# Supplementary material for: Development of a Ferroptosis-Related lncRNA Signature to Predict the Prognosis and Immune Landscape of Bladder Cancer
Source: Hindawi journal article supplement (doi:10.1155/2021/1031906), 2021-06-20
Supplement: f1 [file 1031906.f1.zip]

Supplementary Table S6. GSVA results of different risk subgroups based on frlncRNA signature.

| id                                               | logFC            | AveExpr          | t                | P. Value        | adj. P. Value   | B                |
|--------------------------------------------------|------------------|------------------|------------------|-----------------|-----------------|------------------|
| MODULE_540                                       | 0.0751<br>27249  | 0.0101<br>93773  | 3.6959<br>94365  | 0.000<br>2496   | 0.005<br>740794 | 0.0097<br>58712  |
| GO_4_IRON_4_SULFUR_CLUSTER_BINDING               | -0.058<br>588567 | -0.041<br>018879 | -3.543<br>247002 | 0.000<br>441967 | 0.009<br>723275 | -0.516<br>820374 |
| GO_IRON_SULFUR_CLUSTER_ASSEMBLY                  | -0.076<br>270067 | -0.044<br>337002 | -3.541<br>911235 | 0.000<br>444142 | 0.009<br>723275 | -0.521<br>333478 |
| GO_SEQUESTERING_OF_IRON_ION                      | 0.0934<br>02211  | 0.0380<br>53515  | 3.2914<br>65394  | 0.001<br>085321 | 0.021<br>706428 | -1.339<br>177041 |
| GO_HEME_TRANSPORT                                | -0.065<br>357992 | -0.022<br>27842  | -3.278<br>284755 | 0.001<br>135885 | 0.021<br>706428 | -1.380<br>650903 |
| GO_CELLULAR_IRON_ION_HOMEOSTASIS                 | 0.0368<br>07403  | -0.011<br>087988 | 3.2213<br>10645  | 0.001<br>380614 | 0.024<br>851043 | -1.558<br>110535 |
| GO_MULTICELLULAR_ORGANISMAL_IRON_ION_HOMEOSTASIS | 0.0660<br>63519  | 0.0119<br>21837  | 3.0813<br>60939  | 0.002<br>203319 | 0.037<br>456416 | -1.981<br>469623 |
| GO_IRON_IMPORT_INTO_CELL                         | 0.0642<br>46779  | -0.002<br>682862 | 2.9396<br>50568  | 0.003<br>47676  | 0.055<br>628154 | -2.391<br>883631 |
| GO_IRON_ION_HOMEOSTASIS                          | 0.0312<br>61069  | -0.011<br>953805 | 2.8858<br>89515  | 0.004<br>114907 | 0.061<br>7236   | -2.542<br>748144 |
| GO_RESPONSE_TO_IRON_ION                          | 0.0365<br>78172  | -0.004<br>878373 | 2.8200<br>98674  | 0.005<br>0402   | 0.070<br>562806 | -2.723<br>737518 |
| GO_IRON_ION_BINDING                              | 0.0192<br>91184  | 0.0052<br>0826   | 2.2611<br>97476  | 0.024<br>284398 | 0.315<br>697178 | -4.098<br>465697 |
| GO_HEME_METABOLIC_PROCESS                        | -0.026<br>58728  | -0.019<br>157496 | -2.103<br>657558 | 0.036<br>03324  | 0.432<br>398874 | -4.432<br>808852 |
| HEME_BIOSYNTHETIC_PROCESS                        | -0.036<br>701962 | -0.022<br>044884 | -1.969<br>762915 | 0.049<br>556272 | 0.545<br>118994 | -4.698<br>409857 |
| GO_IRON_ION_TRANSMEMBRANE                        | 0.0422           | -0.033           | 1.9657           | 0.050           | 0.545           | -4.706           |

|                                            |        |        |        |       |       |        |
|--------------------------------------------|--------|--------|--------|-------|-------|--------|
| _TRANSPORTER_ACTIVITY                      | 55932  | 31226  | 67828  | 01794 | 11899 | 071897 |
|                                            |        |        |        | 5     | 4     |        |
| GO_IRON_COORDINATION_ENTI                  | -0.032 | -0.011 | -1.816 | 0.070 | 0.630 | -4.981 |
| TY_TRANSPORT                               | 279771 | 775791 | 511016 | 04163 | 37473 | 381269 |
|                                            |        |        |        | 8     | 8     |        |
| HALLMARK_HEME_METABOLISM                   | 0.0110 | -0.017 | 1.2413 | 0.215 |       | -5.841 |
|                                            | 17288  | 889426 | 98003  | 18747 | 1     | 559741 |
|                                            |        |        |        | 2     |       |        |
| GO_IRON_ION_TRANSPORT                      | 0.0134 | -0.010 | 1.2015 | 0.230 |       | -5.889 |
|                                            | 26759  | 024673 | 20012  | 26166 | 1     | 320919 |
|                                            |        |        |        | 9     |       |        |
| GO_2_IRON_2_SULFUR_CLUSTER_BINDING         | -0.023 | -0.032 | -1.111 | 0.266 |       | -5.990 |
|                                            | 455992 | 958727 | 967974 | 82093 | 1     | 932607 |
| GO_IRON_ION_TRANSMEMBRANE_TRANSPORT        | 0.0180 | -0.022 | 1.0191 | 0.308 |       | -6.087 |
|                                            | 3015   | 367967 | 86425  | 73155 | 1     | 96148  |
|                                            |        |        |        |       |       |        |
| GO_PROTOPORPHYRINOGEN_IX_METABOLIC_PROCESS | -0.014 | -0.029 | -0.779 | 0.436 |       | -6.299 |
|                                            | 0828   | 711937 | 673563 | 04489 | 1     | 552821 |
|                                            |        |        |        | 7     |       |        |
| REACTOME_IRON_UPTAKE_AND_TRANSPORT         | 0.0096 | -0.018 | 0.7508 | 0.453 |       | -6.321 |
|                                            | 98765  | 593467 | 78768  | 16787 | 1     | 209723 |
|                                            |        |        |        |       |       |        |
| GO_REGULATION_OF_IRON_ION_TRANSPORT        | 0.0091 | 0.0112 | 0.3809 | 0.703 |       | -6.527 |
|                                            | 4345   | 22425  | 79275  | 42123 | 1     | 066803 |
|                                            |        |        |        | 3     |       |        |
| GO_CELLULAR_RESPONSE_TO_IRON_ION           | 0.0023 | -0.012 | 0.1276 | 0.898 |       | -6.590 |
|                                            | 433    | 473918 | 9936   | 45118 | 1     | 45922  |

---
