# Supplementary material for: Development of a Ferroptosis-Related lncRNA Signature to Predict the Prognosis and Immune Landscape of Bladder Cancer
Source: Hindawi journal article supplement (doi:10.1155/2021/1031906), 2021-06-20
Supplement: f1 [file 1031906.f1.zip]

Supplementary Table S1. 20 ferroptosis regulators were differentially expressed between BCa and paracarinoma samples.

| gene    | logFC        | logCPM       | PValue   | FDR      |
|---------|--------------|--------------|----------|----------|
| ORAI1   | 0.344829075  | 4.910796787  | 6.29E-02 | 1.04E-01 |
| ATF3    | -3.066643529 | 6.824484612  | 3.40E-33 | 2.82E-31 |
| BAP1    | 0.11734232   | 6.406181595  | 3.28E-01 | 4.16E-01 |
| CD01    | -1.864375412 | 0.766890655  | 1.15E-05 | 5.84E-05 |
| TP53    | 0.413248331  | 6.357973428  | 6.40E-02 | 1.06E-01 |
| ATM     | -0.481319485 | 5.139139396  | 2.21E-03 | 5.92E-03 |
| ZEB1    | -2.849320493 | 4.506179225  | 2.62E-40 | 3.50E-38 |
| DDIT3   | 0.384344005  | 4.574685679  | 9.65E-02 | 1.50E-01 |
| GLS2    | 0.17175121   | -0.407600465 | 6.37E-01 | 7.09E-01 |
| GOT1    | 0.02510147   | 5.530909769  | 8.96E-01 | 9.24E-01 |
| SLC38A1 | 0.968100717  | 7.698942811  | 2.12E-06 | 1.28E-05 |
| ABCC1   | 0.089161974  | 6.558697752  | 7.34E-01 | 7.93E-01 |
| HMOX1   | 1.011111745  | 6.184530634  | 1.11E-02 | 2.37E-02 |
| IREB2   | 0.14527421   | 5.563721158  | 2.81E-01 | 3.65E-01 |
| TF      | 1.774311513  | 4.319840577  | 5.70E-02 | 9.59E-02 |
| TFRC    | 1.210513669  | 7.925259245  | 4.24E-05 | 1.87E-04 |
| LTF     | 1.868429934  | 6.687419556  | 6.50E-02 | 1.07E-01 |
| BRAF    | -0.032863272 | 5.286957098  | 8.23E-01 | 8.66E-01 |
| KRAS    | 0.090580896  | 5.835047139  | 6.40E-01 | 7.12E-01 |
| ACSL4   | -0.138645128 | 5.843206003  | 5.08E-01 | 5.92E-01 |
| ALOX12  | -1.991909239 | 2.949184475  | 1.06E-09 | 1.19E-08 |
| ALOX15B | -2.2071967   | 2.752588354  | 7.80E-09 | 7.59E-08 |
| ALOXE3  | 1.58665713   | 0.973107149  | 5.17E-03 | 1.23E-02 |
| CS      | 0.070748361  | 7.276540997  | 5.45E-01 | 6.26E-01 |
| CSF2    | 2.800483241  | 0.318208061  | 1.31E-04 | 5.07E-04 |
| EPAS1   | -0.232395365 | 8.157678408  | 2.78E-01 | 3.62E-01 |
| HILPDA  | 1.775148938  | 5.773826049  | 1.02E-06 | 6.55E-06 |
| LPCAT3  | 0.389449541  | 4.617519953  | 1.03E-01 | 1.58E-01 |
| MDM2    | 0.89378648   | 7.410517515  | 1.45E-02 | 2.99E-02 |
| PEBP1   | 0.351464135  | 8.799887905  | 1.02E-01 | 1.58E-01 |
| POR     | 0.543167605  | 7.253421256  | 1.16E-03 | 3.39E-03 |
| SAT1    | 0.41021205   | 8.248085639  | 1.02E-01 | 1.58E-01 |
| SQLE    | 1.533239027  | 6.48444592   | 2.31E-08 | 2.06E-07 |
| YAP1    | -0.588496473 | 7.104576134  | 7.77E-03 | 1.75E-02 |
| ATG3    | 0.259920908  | 5.609441001  | 2.48E-02 | 4.72E-02 |
| ATG5    | 0.125137345  | 5.320247659  | 3.64E-01 | 4.54E-01 |
| ATG7    | 0.49126391   | 5.103292891  | 1.39E-03 | 3.99E-03 |
| ATG13   | 0.080020395  | 6.169236597  | 5.54E-01 | 6.35E-01 |
| ATG16L1 | -0.218495942 | 4.803312174  | 4.34E-02 | 7.59E-02 |
| BECN1   | -0.1438908   | 5.808788644  | 2.39E-01 | 3.20E-01 |
| ELAVL1  | 0.40337972   | 6.692891387  | 7.46E-06 | 3.96E-05 |

|          |              |             |          |          |
|----------|--------------|-------------|----------|----------|
| MAP1LC3B | -0.372122753 | 6.217826173 | 1.14E-03 | 3.35E-03 |
| NCOA4    | -0.505110718 | 7.267148811 | 1.98E-04 | 7.25E-04 |
| PINK1    | -0.562152811 | 4.742207667 | 9.76E-05 | 3.90E-04 |
| RAB7A    | 0.326890016  | 8.256005688 | 3.07E-03 | 7.83E-03 |
| SQSTM1   | -0.530185823 | 8.071621249 | 1.25E-03 | 3.63E-03 |
| STAT3    | -0.483006618 | 7.646691398 | 4.00E-04 | 1.35E-03 |
| CTSB     | 0.469897095  | 10.14758604 | 7.69E-02 | 1.24E-01 |
| ULK1     | 0.353613689  | 6.327455695 | 2.73E-02 | 5.12E-02 |
| ULK2     | -0.469777628 | 4.396511561 | 1.01E-02 | 2.19E-02 |
| BBC3     | 1.204867525  | 4.178921265 | 3.44E-07 | 2.45E-06 |
| BID      | 1.300843404  | 5.9546214   | 1.43E-11 | 2.10E-10 |
| VDAC2    | -0.487962115 | 6.144715047 | 5.38E-04 | 1.74E-03 |
| VDAC3    | 0.051108257  | 6.65167087  | 7.43E-01 | 8.01E-01 |
| ACVR1B   | 0.427002371  | 5.638434381 | 2.04E-02 | 4.01E-02 |
| CDKN2A   | 4.097475476  | 5.999591235 | 3.40E-07 | 2.42E-06 |
| EIF2AK2  | 0.495833552  | 6.415571846 | 2.31E-03 | 6.16E-03 |
| KEAP1    | 0.323071415  | 6.717295166 | 1.19E-02 | 2.52E-02 |
| TGFBR1   | -0.310619308 | 5.81931071  | 1.40E-01 | 2.05E-01 |
| CYBB     | 0.208974807  | 5.128160971 | 6.79E-01 | 7.47E-01 |
| DPP4     | 1.048488916  | 3.373443059 | 5.74E-02 | 9.64E-02 |
| HDDC3    | 0.587503621  | 3.488138825 | 5.15E-04 | 1.68E-03 |
| NOX1     | 0.956935067  | 1.843197336 | 2.62E-02 | 4.94E-02 |
| NOX4     | 0.728661904  | 1.804678011 | 4.20E-02 | 7.39E-02 |
| AKR1C1   | 0.403930711  | 6.79297729  | 5.37E-01 | 6.20E-01 |
| AKR1C2   | 0.098618306  | 7.943417552 | 9.38E-01 | 9.57E-01 |
| AKR1C3   | 0.221454211  | 7.468457069 | 7.14E-01 | 7.77E-01 |
| GCH1     | -0.436451265 | 4.359561068 | 1.53E-02 | 3.14E-02 |
| CDH1     | 0.878099842  | 9.037407125 | 6.51E-03 | 1.50E-02 |
| ITGA6    | -0.055414001 | 7.805947338 | 8.09E-01 | 8.55E-01 |
| ITGB4    | 1.065002281  | 9.280348345 | 1.03E-03 | 3.08E-03 |
| NF2      | 0.163120195  | 5.588805953 | 3.20E-01 | 4.07E-01 |
| AIFM2    | 0.267554053  | 4.840548034 | 2.04E-01 | 2.81E-01 |
| COQ2     | 0.407268198  | 3.62480621  | 3.07E-02 | 5.66E-02 |
| CD44     | 0.020261852  | 8.775876049 | 9.90E-01 | 9.95E-01 |
| MUC1     | 1.590159678  | 8.176358799 | 1.86E-03 | 5.11E-03 |
| OTUB1    | 0.680312379  | 7.091222928 | 8.31E-07 | 5.45E-06 |
| SLC3A2   | 0.984103014  | 7.849670098 | 1.93E-05 | 9.31E-05 |
| SLC7A11  | 0.638974341  | 5.166697078 | 3.22E-01 | 4.09E-01 |
| FANCD2   | 1.770481985  | 4.997335953 | 2.21E-15 | 5.10E-14 |
| TFAM     | 0.443463634  | 5.400538393 | 1.54E-03 | 4.36E-03 |
| ATF4     | -0.375262344 | 8.287404312 | 4.77E-03 | 1.15E-02 |
| HSPA5    | 0.695661912  | 9.480086965 | 7.09E-06 | 3.79E-05 |
| GCLC     | -0.153649106 | 6.748551279 | 5.64E-01 | 6.44E-01 |
| CISD1    | -0.288014783 | 4.435463628 | 6.60E-02 | 1.09E-01 |

|          |              |              |             |             |
|----------|--------------|--------------|-------------|-------------|
| CISD2    | 0.687242671  | 5.035506183  | 3.94E-07    | 2.77E-06    |
| FTH1     | 0.173674902  | 8.997736978  | 3.73E-01    | 4.62E-01    |
| FTMT     | 2.735921281  | -3.6376038   | 7.59E-02    | 1.22E-01    |
| HSPB1    | -0.116917774 | 10.56296462  | 6.07E-01    | 6.83E-01    |
| ISCU     | -0.433059183 | 6.24924552   | 7.95E-05    | 3.25E-04    |
| PROM2    | 0.74213003   | 8.037098764  | 5.18E-02    | 8.84E-02    |
| SLC40A1  | -0.398576248 | 5.957651451  | 1.78E-01    | 2.50E-01    |
| ACSL3    | 0.047527883  | 6.552969779  | 8.01E-01    | 8.47E-01    |
| FDFT1    | 0.503808547  | 7.512183198  | 2.12E-02    | 4.14E-02    |
| GPX4     | 0.373964276  | 7.886363424  | 3.57E-02    | 6.43E-02    |
| HIF1A    | 0.15877897   | 7.64067462   | 5.15E-01    | 5.99E-01    |
| PLIN2    | 0.04990445   | 6.595999451  | 9.06E-01    | 9.32E-01    |
| SCD      | 1.90196809   | 8.898506114  | 2.89E-06    | 1.69E-05    |
| TPD52    | 0.447819776  | 6.213272433  | 3.09E-02    | 5.69E-02    |
| VHL      | 0.977137513  | 5.854479495  | 1.23E-07    | 9.55E-07    |
| ARNTL    | -0.168133358 | 2.953944362  | 3.44E-01    | 4.33E-01    |
| CHMP5    | 0.240941238  | 6.379238354  | 8.65E-02    | 1.36E-01    |
| CHMP6    | 0.18559512   | 4.772836803  | 2.36E-01    | 3.16E-01    |
| NEDD4    | -0.188997308 | 4.374552416  | 3.27E-01    | 4.15E-01    |
| MT1G     | 0.831900305  | 2.561283376  | 1.42E-01    | 2.07E-01    |
| NFE2L2   | -0.826287265 | 7.231005935  | 2.10E-08    | 1.89E-07    |
| NQO1     | 0.468613655  | 7.742211889  | 1.99E-01    | 2.75E-01    |
| PRDX1    | 0.341622706  | 8.640331089  | 5.59E-02    | 9.42E-02    |
| PRDX5    | 0.377755427  | 8.137043927  | 4.89E-02    | 8.42E-02    |
| PRDX6    | 0.294331765  | 7.978344354  | 8.31E-02    | 1.32E-01    |
| CAV1     | -1.363577928 | 7.593696333  | 3.39E-05    | 1.54E-04    |
| NOS2     | 0.093792728  | 2.0369378    | 9.49E-01    | 9.65E-01    |
| CBS      | 2.09780915   | 0.452457033  | 4.58E-04    | 1.52E-03    |
| TXN      | 0.413708553  | 8.042888865  | 7.72E-02    | 1.24E-01    |
| MDM4     | 0.160288758  | 5.265727691  | 0.366492012 | 0.456142061 |
| PRKAA1   | 0.044244156  | 6.150973556  | 0.787388847 | 0.836620817 |
| HSP90AA1 | 0.329770164  | 10.39809214  | 0.03509363  | 0.063374557 |
| TMEM173  | -0.28100113  | 5.583237378  | 0.197960676 | 0.273652853 |
| CARS     | 0.255101923  | 6.042863828  | 0.044667129 | 0.077821227 |
| PRR4     | 0.693825849  | -0.415713606 | 0.010484778 | 0.022594186 |
