# Supplementary material for: Development of a Ferroptosis-Related lncRNA Signature to Predict the Prognosis and Immune Landscape of Bladder Cancer
Source: Hindawi journal article supplement (doi:10.1155/2021/1031906), 2021-06-20
Supplement: f1 [file 1031906.f1.zip]

Supplementary Table S10. The prediction of the transcription factors of ZEB1.

| seqname          | source   | feature  | start    | end      | score | strand | frame | attributes                                                            |
|------------------|----------|----------|----------|----------|-------|--------|-------|-----------------------------------------------------------------------|
| ZEB1 NM_01323647 | TF<br>BS | TF<br>BS | 23<br>00 | 23<br>05 | 1     | +      | .     | TF=ZNF354C;class=C2<br>H2 zinc finger<br>factors;sequence=ATC<br>CAC  |
| ZEB1 NM_01323647 | TF<br>BS | TF<br>BS | 10<br>44 | 10<br>49 | 1     | -      | .     | TF=ZNF354C;class=C2<br>H2 zinc finger<br>factors;sequence=ATC<br>CAC  |
| ZEB1 NM_01323647 | TF<br>BS | TF<br>BS | 27<br>6  | 28<br>3  | 1     | -      | .     | TF=HOXB4;class=Homeo domain<br>factors;sequence=ATC<br>ATTAG          |
| ZEB1 NM_01323647 | TF<br>BS | TF<br>BS | 27<br>6  | 28<br>3  | 1     | -      | .     | TF=HOXD4;class=Homeo domain<br>factors;sequence=ATC<br>ATTAG          |
| ZEB1 NM_01323647 | TF<br>BS | TF<br>BS | 21<br>3  | 22<br>1  | 1     | -      | .     | TF=IRF6;class=Tryptophan cluster<br>factors;sequence=ACCGAAACT        |
| ZEB1 NM_01323647 | TF<br>BS | TF<br>BS | 61<br>6  | 62<br>5  | 1     | -      | .     | TF=ZKSCAN1;class=C2H2 zinc finger<br>factors;sequence=ATAGTAGGTG      |
| ZEB1 NM_01128128 | TF<br>BS | TF<br>BS | 23<br>00 | 23<br>05 | 1     | +      | .     | TF=ZNF354C;class=C2<br>H2 zinc finger<br>factors;sequence=ATC<br>CAC  |
| ZEB1 NM_01128128 | TF<br>BS | TF<br>BS | 14<br>77 | 14<br>83 | 1     | +      | .     | TF=NFATC2;class=Rel homology region (RHR)<br>factors;sequence=TTTTCCA |
| ZEB1 NM_01128128 | TF<br>BS | TF<br>BS | 84<br>4  | 85<br>1  | 1     | -      | .     | TF=PITX1;class=Homeo domain<br>factors;sequence=CTAATCCC              |
| ZEB1 NM_01323641 | TF<br>BS | TF<br>BS | 23<br>00 | 23<br>05 | 1     | +      | .     | TF=ZNF354C;class=C2<br>H2 zinc finger<br>factors;sequence=ATC         |

|                  |          |          |          |          |   |   |   |                                                                             |
|------------------|----------|----------|----------|----------|---|---|---|-----------------------------------------------------------------------------|
| ZEB1 NM_01323641 | TF<br>BS | TF<br>BS | 14<br>42 | 14<br>47 | 1 | - | . | CAC<br>TF=ZNF354C;class=C2<br>H2 zinc finger<br>factors;sequence=ATC<br>CAC |
| ZEB1 NM_01323641 | TF<br>BS | TF<br>BS | 75<br>4  | 81<br>1  | 1 | - | . | TF=MEIS1;class=Hom<br>eo domain<br>factors;sequence=TTG<br>ACAG             |
| ZEB1 NM_01323641 | TF<br>BS | TF<br>BS | 67<br>4  | 68<br>1  | 1 | - | . | TF=HOXB4;class=Ho<br>meo domain<br>factors;sequence=ATC<br>ATTAG            |
| ZEB1 NM_01323641 | TF<br>BS | TF<br>BS | 67<br>4  | 68<br>1  | 1 | - | . | TF=HOXD4;class=Ho<br>meo domain<br>factors;sequence=ATC<br>ATTAG            |
| ZEB1 NM_01323641 | TF<br>BS | TF<br>BS | 61<br>1  | 61<br>9  | 1 | - | . | TF=IRF6;class=Tryptop<br>han cluster<br>factors;sequence=ACC<br>GAAACT      |
| ZEB1 NM_01323641 | TF<br>BS | TF<br>BS | 10<br>14 | 10<br>23 | 1 | - | . | TF=ZKSCAN1;class=C<br>2H2 zinc finger<br>factors;sequence=ATA<br>GTAGGTG    |
| ZEB1 NM_01323638 | TF<br>BS | TF<br>BS | 23<br>00 | 23<br>05 | 1 | + | . | TF=ZNF354C;class=C2<br>H2 zinc finger<br>factors;sequence=ATC<br>CAC        |
| ZEB1 NM_01323638 | TF<br>BS | TF<br>BS | 38<br>8  | 39<br>3  | 1 | - | . | TF=ZNF354C;class=C2<br>H2 zinc finger<br>factors;sequence=ATC<br>CAC        |
| ZEB1 NM_01323638 | TF<br>BS | TF<br>BS | 18<br>43 | 18<br>48 | 1 | - | . | TF=ZNF354C;class=C2<br>H2 zinc finger<br>factors;sequence=ATC<br>CAC        |
| ZEB1 NM_01323638 | TF<br>BS | TF<br>BS | 47<br>6  | 48<br>2  | 1 | - | . | TF=MEIS1;class=Hom<br>eo domain<br>factors;sequence=TTG<br>ACAG             |
| ZEB1 NM_01323638 | TF<br>BS | TF<br>BS | 31<br>0  | 32<br>1  | 1 | + | . | TF=ZNF384;class=C2H<br>2 zinc finger<br>factors;sequence=TTTA               |

|                  |          |          |          |          |   |   |   |                                                                    |
|------------------|----------|----------|----------|----------|---|---|---|--------------------------------------------------------------------|
|                  |          |          |          |          |   |   |   | AAAAAAAAA                                                          |
| ZEB1 NM_01323638 | TF<br>BS | TF<br>BS | 85<br>75 | 92<br>82 | 1 | + | . | TF=GATA3;class=Other C4 zinc finger-type factors;sequence=AGATAAGA |
| ZEB1 NM_01323638 | TF<br>BS | TF<br>BS | 10<br>75 | 10<br>82 | 1 | - | . | TF=HOXB4;class=Homeo domain factors;sequence=ATCATTAG              |
| ZEB1 NM_01323638 | TF<br>BS | TF<br>BS | 39<br>5  | 40<br>2  | 1 | - | . | TF=HOXC4;class=Homeo domain factors;sequence=GTCATTAA              |
| ZEB1 NM_01323638 | TF<br>BS | TF<br>BS | 10<br>75 | 10<br>82 | 1 | - | . | TF=HOXD4;class=Homeo domain factors;sequence=ATCATTAG              |
| ZEB1 NM_01323638 | TF<br>BS | TF<br>BS | 10<br>12 | 10<br>20 | 1 | - | . | TF=IRF6;class=Tryptophan cluster factors;sequence=ACCGAAACT        |
| ZEB1 NM_01323638 | TF<br>BS | TF<br>BS | 14<br>15 | 14<br>24 | 1 | - | . | TF=ZKSCAN1;class=C2H2 zinc finger factors;sequence=ATAGTAGGTG      |
| ZEB1 NM_01323644 | TF<br>BS | TF<br>BS | 23<br>00 | 23<br>05 | 1 | + | . | TF=ZNF354C;class=C2H2 zinc finger factors;sequence=ATCCAC          |
| ZEB1 NM_01323644 | TF<br>BS | TF<br>BS | 14<br>42 | 14<br>47 | 1 | - | . | TF=ZNF354C;class=C2H2 zinc finger factors;sequence=ATCCAC          |
| ZEB1 NM_01323644 | TF<br>BS | TF<br>BS | 75       | 81       | 1 | - | . | TF=MEIS1;class=Homeo domain factors;sequence=TTGACAG               |
| ZEB1 NM_01323644 | TF<br>BS | TF<br>BS | 67<br>4  | 68<br>1  | 1 | - | . | TF=HOXB4;class=Homeo domain factors;sequence=ATCATTAG              |
| ZEB1 NM_01323644 | TF<br>BS | TF<br>BS | 67<br>4  | 68<br>1  | 1 | - | . | TF=HOXD4;class=Homeo domain factors;sequence=ATC                   |

|                  |          |          |          |          |   |   |   |                                                                         |
|------------------|----------|----------|----------|----------|---|---|---|-------------------------------------------------------------------------|
| ZEB1 NM_01323644 | TF<br>BS | TF<br>BS | 61<br>1  | 61<br>9  | 1 | - | . | ATTAG<br>TF=IRF6;class=Tryptophan cluster<br>factors;sequence=ACCGAAACT |
| ZEB1 NM_01323644 | TF<br>BS | TF<br>BS | 10<br>14 | 10<br>23 | 1 | - | . | TF=ZKSCAN1;class=C2H2 zinc finger<br>factors;sequence=ATAGTAGGTG        |
| ZEB1 NM_01323643 | TF<br>BS | TF<br>BS | 23<br>00 | 23<br>05 | 1 | + | . | TF=ZNF354C;class=C2H2 zinc finger<br>factors;sequence=ATCACAC           |
| ZEB1 NM_01323643 | TF<br>BS | TF<br>BS | 38<br>8  | 39<br>3  | 1 | - | . | TF=ZNF354C;class=C2H2 zinc finger<br>factors;sequence=ATCACAC           |
| ZEB1 NM_01323643 | TF<br>BS | TF<br>BS | 18<br>43 | 18<br>48 | 1 | - | . | TF=ZNF354C;class=C2H2 zinc finger<br>factors;sequence=ATCACAC           |
| ZEB1 NM_01323643 | TF<br>BS | TF<br>BS | 47<br>6  | 48<br>2  | 1 | - | . | TF=MEIS1;class=Homeo domain<br>factors;sequence=TTGACAG                 |
| ZEB1 NM_01323643 | TF<br>BS | TF<br>BS | 31<br>0  | 32<br>1  | 1 | + | . | TF=ZNF384;class=C2H2 zinc finger<br>factors;sequence=TTTAAAAA           |
| ZEB1 NM_01323643 | TF<br>BS | TF<br>BS | 85       | 92       | 1 | + | . | TF=GATA3;class=Other C4 zinc finger-type<br>factors;sequence=AGATAAGA   |
| ZEB1 NM_01323643 | TF<br>BS | TF<br>BS | 10<br>75 | 10<br>82 | 1 | - | . | TF=HOXB4;class=Homeo domain<br>factors;sequence=ATCATTAG                |
| ZEB1 NM_01323643 | TF<br>BS | TF<br>BS | 39<br>5  | 40<br>2  | 1 | - | . | TF=HOXC4;class=Homeo domain<br>factors;sequence=GTCATTAA                |
| ZEB1 NM_01323643 | TF<br>BS | TF<br>BS | 10<br>75 | 10<br>82 | 1 | - | . | TF=HOXD4;class=Homeo domain<br>factors;sequence=ATC                     |

|                  |          |          |          |          |   |   |   |                                                                         |
|------------------|----------|----------|----------|----------|---|---|---|-------------------------------------------------------------------------|
| ZEB1 NM_01323643 | TF<br>BS | TF<br>BS | 10<br>12 | 10<br>20 | 1 | - | . | ATTAG<br>TF=IRF6;class=Tryptophan cluster<br>factors;sequence=ACCGAAACT |
| ZEB1 NM_01323643 | TF<br>BS | TF<br>BS | 14<br>15 | 14<br>24 | 1 | - | . | TF=ZKSCAN1;class=C2H2 zinc finger<br>factors;sequence=ATAGTAGGTG        |
| ZEB1 NM_01323674 | TF<br>BS | TF<br>BS | 23<br>00 | 23<br>05 | 1 | + | . | TF=ZNF354C;class=C2H2 zinc finger<br>factors;sequence=ATCACAC           |
| ZEB1 NM_01323674 | TF<br>BS | TF<br>BS | 10<br>44 | 10<br>49 | 1 | - | . | TF=ZNF354C;class=C2H2 zinc finger<br>factors;sequence=ATCACAC           |
| ZEB1 NM_01323674 | TF<br>BS | TF<br>BS | 27<br>6  | 28<br>3  | 1 | - | . | TF=HOXB4;class=Homeo domain<br>factors;sequence=ATCATTAG                |
| ZEB1 NM_01323674 | TF<br>BS | TF<br>BS | 27<br>6  | 28<br>3  | 1 | - | . | TF=HOXD4;class=Homeo domain<br>factors;sequence=ATCATTAG                |
| ZEB1 NM_01323674 | TF<br>BS | TF<br>BS | 21<br>3  | 22<br>1  | 1 | - | . | TF=IRF6;class=Tryptophan cluster<br>factors;sequence=ACCGAAACT          |
| ZEB1 NM_01323674 | TF<br>BS | TF<br>BS | 61<br>6  | 62<br>5  | 1 | - | . | TF=ZKSCAN1;class=C2H2 zinc finger<br>factors;sequence=ATAGTAGGTG        |
| ZEB1 NM_01323673 | TF<br>BS | TF<br>BS | 23<br>00 | 23<br>05 | 1 | + | . | TF=ZNF354C;class=C2H2 zinc finger<br>factors;sequence=ATCACAC           |
| ZEB1 NM_01323673 | TF<br>BS | TF<br>BS | 10<br>18 | 10<br>24 | 1 | + | . | TF=NFATC2;class=Rel homology region (RHR)<br>factors;sequence=TTTCCA    |
| ZEB1 NM_01323673 | TF<br>BS | TF<br>BS | 38<br>5  | 39<br>2  | 1 | - | . | TF=PITX1;class=Homeo domain                                             |

|                  |          |          |          |          |   |   |   |                                                                                                       |
|------------------|----------|----------|----------|----------|---|---|---|-------------------------------------------------------------------------------------------------------|
| ZEB1 NM_01323658 | TF<br>BS | TF<br>BS | 23<br>00 | 23<br>05 | 1 | + | . | factors;sequence=CTA<br>ATCCC<br>TF=ZNF354C;class=C2<br>H2 zinc finger<br>factors;sequence=ATC<br>CAC |
| ZEB1 NM_01323658 | TF<br>BS | TF<br>BS | 49<br>2  | 49<br>7  | 1 | - | . | TF=ZNF354C;class=C2<br>H2 zinc finger<br>factors;sequence=ATC<br>CAC                                  |
| ZEB1 NM_01323658 | TF<br>BS | TF<br>BS | 64       | 73       | 1 | - | . | TF=ZKSCAN1;class=C<br>2H2 zinc finger<br>factors;sequence=ATA<br>GTAGGTG                              |
| ZEB1 NM_01323657 | TF<br>BS | TF<br>BS | 23<br>00 | 23<br>05 | 1 | + | . | TF=ZNF354C;class=C2<br>H2 zinc finger<br>factors;sequence=ATC<br>CAC                                  |
| ZEB1 NM_01323657 | TF<br>BS | TF<br>BS | 49<br>2  | 49<br>7  | 1 | - | . | TF=ZNF354C;class=C2<br>H2 zinc finger<br>factors;sequence=ATC<br>CAC                                  |
| ZEB1 NM_01323657 | TF<br>BS | TF<br>BS | 64       | 73       | 1 | - | . | TF=ZKSCAN1;class=C<br>2H2 zinc finger<br>factors;sequence=ATA<br>GTAGGTG                              |
| ZEB1 NM_01323650 | TF<br>BS | TF<br>BS | 23<br>00 | 23<br>05 | 1 | + | . | TF=ZNF354C;class=C2<br>H2 zinc finger<br>factors;sequence=ATC<br>CAC                                  |
| ZEB1 NM_01323650 | TF<br>BS | TF<br>BS | 10<br>44 | 10<br>49 | 1 | - | . | TF=ZNF354C;class=C2<br>H2 zinc finger<br>factors;sequence=ATC<br>CAC                                  |
| ZEB1 NM_01323650 | TF<br>BS | TF<br>BS | 27<br>6  | 28<br>3  | 1 | - | . | TF=HOXB4;class=Ho<br>meo domain<br>factors;sequence=ATC<br>ATTAG                                      |
| ZEB1 NM_01323650 | TF<br>BS | TF<br>BS | 27<br>6  | 28<br>3  | 1 | - | . | TF=HOXD4;class=Ho<br>meo domain<br>factors;sequence=ATC<br>ATTAG                                      |
| ZEB1 NM_01323650 | TF<br>BS | TF<br>BS | 21<br>3  | 22<br>1  | 1 | - | . | TF=IRF6;class=Tryptop<br>han cluster                                                                  |

|                  |          |          |          |          |   |   |   |                                                                          |
|------------------|----------|----------|----------|----------|---|---|---|--------------------------------------------------------------------------|
| ZEB1 NM_01323650 | TF<br>BS | TF<br>BS | 61<br>6  | 62<br>5  | 1 | - | . | factors;sequence=ACC<br>GAAACT<br>TF=ZKSCAN1;class=C<br>2H2 zinc finger  |
| ZEB1 NM_01323648 | TF<br>BS | TF<br>BS | 23<br>00 | 23<br>05 | 1 | + | . | factors;sequence=ATA<br>GTAGGTG<br>TF=ZNF354C;class=C2<br>H2 zinc finger |
| ZEB1 NM_01323648 | TF<br>BS | TF<br>BS | 10<br>44 | 10<br>49 | 1 | - | . | factors;sequence=ATC<br>CAC<br>TF=ZNF354C;class=C2<br>H2 zinc finger     |
| ZEB1 NM_01323648 | TF<br>BS | TF<br>BS | 27<br>6  | 28<br>3  | 1 | - | . | factors;sequence=ATC<br>CAC<br>TF=HOXB4;class=Ho<br>meo domain           |
| ZEB1 NM_01323648 | TF<br>BS | TF<br>BS | 27<br>6  | 28<br>3  | 1 | - | . | factors;sequence=ATC<br>ATTAG<br>TF=HOXD4;class=Ho<br>meo domain         |
| ZEB1 NM_01323648 | TF<br>BS | TF<br>BS | 21<br>3  | 22<br>1  | 1 | - | . | factors;sequence=ATC<br>ATTAG<br>TF=IRF6;class=Tryptop<br>han cluster    |
| ZEB1 NM_01323648 | TF<br>BS | TF<br>BS | 61<br>6  | 62<br>5  | 1 | - | . | factors;sequence=ACC<br>GAAACT<br>TF=ZKSCAN1;class=C<br>2H2 zinc finger  |
| ZEB1 NM_01174095 | TF<br>BS | TF<br>BS | 23<br>00 | 23<br>05 | 1 | + | . | factors;sequence=ATA<br>GTAGGTG<br>TF=ZNF354C;class=C2<br>H2 zinc finger |
| ZEB1 NM_01174095 | TF<br>BS | TF<br>BS | 10<br>44 | 10<br>49 | 1 | - | . | factors;sequence=ATC<br>CAC<br>TF=ZNF354C;class=C2<br>H2 zinc finger     |
| ZEB1 NM_01174095 | TF<br>BS | TF<br>BS | 27<br>6  | 28<br>3  | 1 | - | . | factors;sequence=ATC<br>CAC<br>TF=HOXB4;class=Ho<br>meo domain           |
| ZEB1 NM_01174095 | TF<br>BS | TF<br>BS | 27<br>6  | 28<br>3  | 1 | - | . | factors;sequence=ATC<br>ATTAG<br>TF=HOXD4;class=Ho<br>meo domain         |

|                   |          |          |          |          |   |   |   |                                                                                                         |
|-------------------|----------|----------|----------|----------|---|---|---|---------------------------------------------------------------------------------------------------------|
| ZEB1 NM_001174095 | TF<br>BS | TF<br>BS | 21<br>3  | 22<br>1  | 1 | - | . | factors;sequence=ATC<br>ATTAG<br>TF=IRF6;class=Tryptop<br>han cluster<br>factors;sequence=ACC<br>GAAACT |
| ZEB1 NM_001174095 | TF<br>BS | TF<br>BS | 61<br>6  | 62<br>5  | 1 | - | . | TF=ZKSCAN1;class=C<br>2H2 zinc finger<br>factors;sequence=ATA<br>GTAGGTG                                |
| ZEB1 NM_001323646 | TF<br>BS | TF<br>BS | 23<br>00 | 23<br>05 | 1 | + | . | TF=ZNF354C;class=C2<br>H2 zinc finger<br>factors;sequence=ATC<br>CAC                                    |
| ZEB1 NM_001323646 | TF<br>BS | TF<br>BS | 14<br>42 | 14<br>47 | 1 | - | . | TF=ZNF354C;class=C2<br>H2 zinc finger<br>factors;sequence=ATC<br>CAC                                    |
| ZEB1 NM_001323646 | TF<br>BS | TF<br>BS | 75       | 81       | 1 | - | . | TF=MEIS1;class=Hom<br>eo domain<br>factors;sequence=TTG<br>ACAG                                         |
| ZEB1 NM_001323646 | TF<br>BS | TF<br>BS | 67<br>4  | 68<br>1  | 1 | - | . | TF=HOXB4;class=Ho<br>meo domain<br>factors;sequence=ATC<br>ATTAG                                        |
| ZEB1 NM_001323646 | TF<br>BS | TF<br>BS | 67<br>4  | 68<br>1  | 1 | - | . | TF=HOXD4;class=Ho<br>meo domain<br>factors;sequence=ATC<br>ATTAG                                        |
| ZEB1 NM_001323646 | TF<br>BS | TF<br>BS | 61<br>1  | 61<br>9  | 1 | - | . | TF=IRF6;class=Tryptop<br>han cluster<br>factors;sequence=ACC<br>GAAACT                                  |
| ZEB1 NM_001323646 | TF<br>BS | TF<br>BS | 10<br>14 | 10<br>23 | 1 | - | . | TF=ZKSCAN1;class=C<br>2H2 zinc finger<br>factors;sequence=ATA<br>GTAGGTG                                |
| ZEB1 NM_001323645 | TF<br>BS | TF<br>BS | 23<br>00 | 23<br>05 | 1 | + | . | TF=ZNF354C;class=C2<br>H2 zinc finger<br>factors;sequence=ATC<br>CAC                                    |
| ZEB1 NM_001323645 | TF<br>BS | TF<br>BS | 14<br>42 | 14<br>47 | 1 | - | . | TF=ZNF354C;class=C2<br>H2 zinc finger                                                                   |



|                       |          |          |          |          |     |   |  |                                                                          |
|-----------------------|----------|----------|----------|----------|-----|---|--|--------------------------------------------------------------------------|
|                       |          |          |          |          |     |   |  | factors;sequence=ATC<br>CAC                                              |
| ZEB1 NM_0<br>01323645 | TF<br>BS | TF<br>BS | 75<br>81 |          | 1 - | . |  | TF=MEIS1;class=Homo<br>meo domain<br>factors;sequence=TTG<br>ACAG        |
| ZEB1 NM_0<br>01323645 | TF<br>BS | TF<br>BS | 67<br>4  | 68<br>1  | 1 - | . |  | TF=HOXB4;class=Homo<br>meo domain<br>factors;sequence=ATC<br>ATTAG       |
| ZEB1 NM_0<br>01323645 | TF<br>BS | TF<br>BS | 67<br>4  | 68<br>1  | 1 - | . |  | TF=HOXD4;class=Homo<br>meo domain<br>factors;sequence=ATC<br>ATTAG       |
| ZEB1 NM_0<br>01323645 | TF<br>BS | TF<br>BS | 61<br>1  | 61<br>9  | 1 - | . |  | TF=IRF6;class=Tryptop<br>han cluster<br>factors;sequence=ACC<br>GAAACT   |
| ZEB1 NM_0<br>01323645 | TF<br>BS | TF<br>BS | 10<br>14 | 10<br>23 | 1 - | . |  | TF=ZKSCAN1;class=C<br>2H2 zinc finger<br>factors;sequence=ATA<br>GTAGGTG |
| ZEB1 NM_0<br>01174093 | TF<br>BS | TF<br>BS | 23<br>00 | 23<br>05 | 1 + | . |  | TF=ZNF354C;class=C2<br>H2 zinc finger<br>factors;sequence=ATC<br>CAC     |
| ZEB1 NM_0<br>01174093 | TF<br>BS | TF<br>BS | 10<br>44 | 10<br>49 | 1 - | . |  | TF=ZNF354C;class=C2<br>H2 zinc finger<br>factors;sequence=ATC<br>CAC     |
| ZEB1 NM_0<br>01174093 | TF<br>BS | TF<br>BS | 27<br>6  | 28<br>3  | 1 - | . |  | TF=HOXB4;class=Homo<br>meo domain<br>factors;sequence=ATC<br>ATTAG       |
| ZEB1 NM_0<br>01174093 | TF<br>BS | TF<br>BS | 27<br>6  | 28<br>3  | 1 - | . |  | TF=HOXD4;class=Homo<br>meo domain<br>factors;sequence=ATC<br>ATTAG       |
| ZEB1 NM_0<br>01174093 | TF<br>BS | TF<br>BS | 21<br>3  | 22<br>1  | 1 - | . |  | TF=IRF6;class=Tryptop<br>han cluster<br>factors;sequence=ACC<br>GAAACT   |
| ZEB1 NM_0<br>01174093 | TF<br>BS | TF<br>BS | 61<br>6  | 62<br>5  | 1 - | . |  | TF=ZKSCAN1;class=C<br>2H2 zinc finger                                    |

|                  |          |          |          |          |   |   |   |                                                                                                         |
|------------------|----------|----------|----------|----------|---|---|---|---------------------------------------------------------------------------------------------------------|
| ZEB1 NM_01323656 | TF<br>BS | TF<br>BS | 23<br>00 | 23<br>05 | 1 | + | . | factors;sequence=ATA<br>GTAGGTG<br>TF=ZNF354C;class=C2<br>H2 zinc finger<br>factors;sequence=ATC<br>CAC |
| ZEB1 NM_01323656 | TF<br>BS | TF<br>BS | 49<br>2  | 49<br>7  | 1 | - | . | TF=ZNF354C;class=C2<br>H2 zinc finger<br>factors;sequence=ATC<br>CAC                                    |
| ZEB1 NM_01323656 | TF<br>BS | TF<br>BS | 64       | 73       | 1 | - | . | TF=ZKSCAN1;class=C<br>2H2 zinc finger<br>factors;sequence=ATA<br>GTAGGTG                                |
| ZEB1 NM_01323655 | TF<br>BS | TF<br>BS | 23<br>00 | 23<br>05 | 1 | + | . | TF=ZNF354C;class=C2<br>H2 zinc finger<br>factors;sequence=ATC<br>CAC                                    |
| ZEB1 NM_01323655 | TF<br>BS | TF<br>BS | 10<br>44 | 10<br>49 | 1 | - | . | TF=ZNF354C;class=C2<br>H2 zinc finger<br>factors;sequence=ATC<br>CAC                                    |
| ZEB1 NM_01323655 | TF<br>BS | TF<br>BS | 27<br>6  | 28<br>3  | 1 | - | . | TF=HOXB4;class=Ho<br>meo domain<br>factors;sequence=ATC<br>ATTAG                                        |
| ZEB1 NM_01323655 | TF<br>BS | TF<br>BS | 27<br>6  | 28<br>3  | 1 | - | . | TF=HOXD4;class=Ho<br>meo domain<br>factors;sequence=ATC<br>ATTAG                                        |
| ZEB1 NM_01323655 | TF<br>BS | TF<br>BS | 21<br>3  | 22<br>1  | 1 | - | . | TF=IRF6;class=Tryptop<br>han cluster<br>factors;sequence=ACC<br>GAAACT                                  |
| ZEB1 NM_01323655 | TF<br>BS | TF<br>BS | 61<br>6  | 62<br>5  | 1 | - | . | TF=ZKSCAN1;class=C<br>2H2 zinc finger<br>factors;sequence=ATA<br>GTAGGTG                                |
| ZEB1 NM_01323654 | TF<br>BS | TF<br>BS | 23<br>00 | 23<br>05 | 1 | + | . | TF=ZNF354C;class=C2<br>H2 zinc finger<br>factors;sequence=ATC<br>CAC                                    |
| ZEB1 NM_01323654 | TF<br>BS | TF<br>BS | 10<br>44 | 10<br>49 | 1 | - | . | TF=ZNF354C;class=C2<br>H2 zinc finger                                                                   |

|                       |          |          |          |          |   |   |   |                                                                          |
|-----------------------|----------|----------|----------|----------|---|---|---|--------------------------------------------------------------------------|
|                       |          |          |          |          |   |   |   | factors;sequence=ATC<br>CAC                                              |
| ZEB1 NM_0<br>01323654 | TF<br>BS | TF<br>BS | 27<br>6  | 28<br>3  | 1 | - | . | TF=HOXB4;class=Ho<br>meo domain<br>factors;sequence=ATC<br>ATTAG         |
| ZEB1 NM_0<br>01323654 | TF<br>BS | TF<br>BS | 27<br>6  | 28<br>3  | 1 | - | . | TF=HOXD4;class=Ho<br>meo domain<br>factors;sequence=ATC<br>ATTAG         |
| ZEB1 NM_0<br>01323654 | TF<br>BS | TF<br>BS | 21<br>3  | 22<br>1  | 1 | - | . | TF=IRF6;class=Tryptop<br>han cluster<br>factors;sequence=ACC<br>GAAACT   |
| ZEB1 NM_0<br>01323654 | TF<br>BS | TF<br>BS | 61<br>6  | 62<br>5  | 1 | - | . | TF=ZKSCAN1;class=C<br>2H2 zinc finger<br>factors;sequence=ATA<br>GTAGGTG |
| ZEB1 NM_0<br>01323653 | TF<br>BS | TF<br>BS | 23<br>00 | 23<br>05 | 1 | + | . | TF=ZNF354C;class=C2<br>H2 zinc finger<br>factors;sequence=ATC<br>CAC     |
| ZEB1 NM_0<br>01323653 | TF<br>BS | TF<br>BS | 10<br>44 | 10<br>49 | 1 | - | . | TF=ZNF354C;class=C2<br>H2 zinc finger<br>factors;sequence=ATC<br>CAC     |
| ZEB1 NM_0<br>01323653 | TF<br>BS | TF<br>BS | 27<br>6  | 28<br>3  | 1 | - | . | TF=HOXB4;class=Ho<br>meo domain<br>factors;sequence=ATC<br>ATTAG         |
| ZEB1 NM_0<br>01323653 | TF<br>BS | TF<br>BS | 27<br>6  | 28<br>3  | 1 | - | . | TF=HOXD4;class=Ho<br>meo domain<br>factors;sequence=ATC<br>ATTAG         |
| ZEB1 NM_0<br>01323653 | TF<br>BS | TF<br>BS | 21<br>3  | 22<br>1  | 1 | - | . | TF=IRF6;class=Tryptop<br>han cluster<br>factors;sequence=ACC<br>GAAACT   |
| ZEB1 NM_0<br>01323653 | TF<br>BS | TF<br>BS | 61<br>6  | 62<br>5  | 1 | - | . | TF=ZKSCAN1;class=C<br>2H2 zinc finger<br>factors;sequence=ATA<br>GTAGGTG |
| ZEB1 NM_0<br>01323652 | TF<br>BS | TF<br>BS | 23<br>00 | 23<br>05 | 1 | + | . | TF=ZNF354C;class=C2<br>H2 zinc finger                                    |

|                       |          |          |          |          |   |   |                                                                               |
|-----------------------|----------|----------|----------|----------|---|---|-------------------------------------------------------------------------------|
|                       |          |          |          |          |   |   | factors;sequence=ATC<br>CAC                                                   |
| ZEB1 NM_0<br>01323652 | TF<br>BS | TF<br>BS | 10<br>44 | 10<br>49 | 1 | - | .<br>TF=ZNF354C;class=C2<br>H2 zinc finger<br>factors;sequence=ATC<br>CAC     |
| ZEB1 NM_0<br>01323652 | TF<br>BS | TF<br>BS | 27<br>6  | 28<br>3  | 1 | - | .<br>TF=HOXB4;class=Ho<br>meo domain<br>factors;sequence=ATC<br>ATTAG         |
| ZEB1 NM_0<br>01323652 | TF<br>BS | TF<br>BS | 27<br>6  | 28<br>3  | 1 | - | .<br>TF=HOXD4;class=Ho<br>meo domain<br>factors;sequence=ATC<br>ATTAG         |
| ZEB1 NM_0<br>01323652 | TF<br>BS | TF<br>BS | 21<br>3  | 22<br>1  | 1 | - | .<br>TF=IRF6;class=Tryptop<br>han cluster<br>factors;sequence=ACC<br>GAAACT   |
| ZEB1 NM_0<br>01323652 | TF<br>BS | TF<br>BS | 61<br>6  | 62<br>5  | 1 | - | .<br>TF=ZKSCAN1;class=C<br>2H2 zinc finger<br>factors;sequence=ATA<br>GTAGGTG |
| ZEB1 NM_0<br>01323651 | TF<br>BS | TF<br>BS | 23<br>00 | 23<br>05 | 1 | + | .<br>TF=ZNF354C;class=C2<br>H2 zinc finger<br>factors;sequence=ATC<br>CAC     |
| ZEB1 NM_0<br>01323651 | TF<br>BS | TF<br>BS | 10<br>44 | 10<br>49 | 1 | - | .<br>TF=ZNF354C;class=C2<br>H2 zinc finger<br>factors;sequence=ATC<br>CAC     |
| ZEB1 NM_0<br>01323651 | TF<br>BS | TF<br>BS | 27<br>6  | 28<br>3  | 1 | - | .<br>TF=HOXB4;class=Ho<br>meo domain<br>factors;sequence=ATC<br>ATTAG         |
| ZEB1 NM_0<br>01323651 | TF<br>BS | TF<br>BS | 27<br>6  | 28<br>3  | 1 | - | .<br>TF=HOXD4;class=Ho<br>meo domain<br>factors;sequence=ATC<br>ATTAG         |
| ZEB1 NM_0<br>01323651 | TF<br>BS | TF<br>BS | 21<br>3  | 22<br>1  | 1 | - | .<br>TF=IRF6;class=Tryptop<br>han cluster<br>factors;sequence=ACC<br>GAAACT   |
| ZEB1 NM_0<br>01323651 | TF<br>BS | TF<br>BS | 61<br>6  | 62<br>5  | 1 | - | .<br>TF=ZKSCAN1;class=C<br>2H2 zinc finger                                    |

|                  |          |          |          |          |   |   |   |                                                                                             |
|------------------|----------|----------|----------|----------|---|---|---|---------------------------------------------------------------------------------------------|
| ZEB1 NM_01323678 | TF<br>BS | TF<br>BS | 23<br>00 | 23<br>05 | 1 | + | . | factors;sequence=ATAGGTG<br>TF=ZNF354C;class=C2<br>H2 zinc finger<br>factors;sequence=ATCAC |
| ZEB1 NM_01323678 | TF<br>BS | TF<br>BS | 14<br>77 | 14<br>83 | 1 | + | . | TF=NFATC2;class=Rel<br>homology region<br>(RHR)<br>factors;sequence=TTTTCCA                 |
| ZEB1 NM_01323678 | TF<br>BS | TF<br>BS | 84<br>4  | 85<br>1  | 1 | - | . | TF=PITX1;class=Home<br>o domain<br>factors;sequence=CTAATCCC                                |
| ZEB1 NM_01323677 | TF<br>BS | TF<br>BS | 23<br>00 | 23<br>05 | 1 | + | . | TF=ZNF354C;class=C2<br>H2 zinc finger<br>factors;sequence=ATCAC                             |
| ZEB1 NM_01323677 | TF<br>BS | TF<br>BS | 10<br>18 | 10<br>24 | 1 | + | . | TF=NFATC2;class=Rel<br>homology region<br>(RHR)<br>factors;sequence=TTTTCCA                 |
| ZEB1 NM_01323677 | TF<br>BS | TF<br>BS | 38<br>5  | 39<br>2  | 1 | - | . | TF=PITX1;class=Home<br>o domain<br>factors;sequence=CTAATCCC                                |
| ZEB1 NM_01323676 | TF<br>BS | TF<br>BS | 23<br>00 | 23<br>05 | 1 | + | . | TF=ZNF354C;class=C2<br>H2 zinc finger<br>factors;sequence=ATCAC                             |
| ZEB1 NM_01323676 | TF<br>BS | TF<br>BS | 10<br>18 | 10<br>24 | 1 | + | . | TF=NFATC2;class=Rel<br>homology region<br>(RHR)<br>factors;sequence=TTTTCCA                 |
| ZEB1 NM_01323676 | TF<br>BS | TF<br>BS | 38<br>5  | 39<br>2  | 1 | - | . | TF=PITX1;class=Home<br>o domain<br>factors;sequence=CTAATCCC                                |
| ZEB1 NM_01323649 | TF<br>BS | TF<br>BS | 23<br>00 | 23<br>05 | 1 | + | . | TF=ZNF354C;class=C2<br>H2 zinc finger<br>factors;sequence=ATC                               |

|                  |          |          |          |          |   |   |   |                                                                                 |
|------------------|----------|----------|----------|----------|---|---|---|---------------------------------------------------------------------------------|
| ZEB1 NM_01323649 | TF<br>BS | TF<br>BS | 10<br>44 | 10<br>49 | 1 | - | . | CAC<br>TF=ZNF354C;class=C2<br>H2 zinc finger<br>factors;sequence=ATC<br>CAC     |
| ZEB1 NM_01323649 | TF<br>BS | TF<br>BS | 27<br>6  | 28<br>3  | 1 | - | . | TF=HOXB4;class=Ho<br>meo domain<br>factors;sequence=ATC<br>ATTAG                |
| ZEB1 NM_01323649 | TF<br>BS | TF<br>BS | 27<br>6  | 28<br>3  | 1 | - | . | TF=HOXD4;class=Ho<br>meo domain<br>factors;sequence=ATC<br>ATTAG                |
| ZEB1 NM_01323649 | TF<br>BS | TF<br>BS | 21<br>3  | 22<br>1  | 1 | - | . | TF=IRF6;class=Tryptop<br>han cluster<br>factors;sequence=ACC<br>GAAACT          |
| ZEB1 NM_01323649 | TF<br>BS | TF<br>BS | 61<br>6  | 62<br>5  | 1 | - | . | TF=ZKSCAN1;class=C<br>2H2 zinc finger<br>factors;sequence=ATA<br>GTAGGTG        |
| ZEB1 NM_01323675 | TF<br>BS | TF<br>BS | 23<br>00 | 23<br>05 | 1 | + | . | TF=ZNF354C;class=C2<br>H2 zinc finger<br>factors;sequence=ATC<br>CAC            |
| ZEB1 NM_01323675 | TF<br>BS | TF<br>BS | 10<br>18 | 10<br>24 | 1 | + | . | TF=NFATC2;class=Rel<br>homology region<br>(RHR)<br>factors;sequence=TTTT<br>CCA |
| ZEB1 NM_01323675 | TF<br>BS | TF<br>BS | 38<br>5  | 39<br>2  | 1 | - | . | TF=PITX1;class=Home<br>o domain<br>factors;sequence=CTA<br>ATCCC                |
| ZEB1 NM_01323672 | TF<br>BS | TF<br>BS | 23<br>00 | 23<br>05 | 1 | + | . | TF=ZNF354C;class=C2<br>H2 zinc finger<br>factors;sequence=ATC<br>CAC            |
| ZEB1 NM_01323672 | TF<br>BS | TF<br>BS | 10<br>18 | 10<br>24 | 1 | + | . | TF=NFATC2;class=Rel<br>homology region<br>(RHR)<br>factors;sequence=TTTT<br>CCA |
| ZEB1 NM_01323672 | TF<br>BS | TF<br>BS | 38<br>5  | 39<br>2  | 1 | - | . | TF=PITX1;class=Home                                                             |

|                       |          |          |          |          |   |   |   |                                                                                 |
|-----------------------|----------|----------|----------|----------|---|---|---|---------------------------------------------------------------------------------|
| 01323672              | BS       | BS       | 5        | 2        |   |   |   | o domain<br>factors;sequence=CTA<br>ATCCC                                       |
| ZEB1 NM_0<br>01323671 | TF<br>BS | TF<br>BS | 23<br>00 | 23<br>05 | 1 | + | . | TF=ZNF354C;class=C2<br>H2 zinc finger<br>factors;sequence=ATC<br>CAC            |
| ZEB1 NM_0<br>01323671 | TF<br>BS | TF<br>BS | 10<br>18 | 10<br>24 | 1 | + | . | TF=NFATC2;class=Rel<br>homology region<br>(RHR)<br>factors;sequence=TTTT<br>CCA |
| ZEB1 NM_0<br>01323671 | TF<br>BS | TF<br>BS | 38<br>5  | 39<br>2  | 1 | - | . | TF=PITX1;class=Home<br>o domain<br>factors;sequence=CTA<br>ATCCC                |
| ZEB1 NM_0<br>01323666 | TF<br>BS | TF<br>BS | 23<br>00 | 23<br>05 | 1 | + | . | TF=ZNF354C;class=C2<br>H2 zinc finger<br>factors;sequence=ATC<br>CAC            |
| ZEB1 NM_0<br>01323666 | TF<br>BS | TF<br>BS | 14<br>77 | 14<br>83 | 1 | + | . | TF=NFATC2;class=Rel<br>homology region<br>(RHR)<br>factors;sequence=TTTT<br>CCA |
| ZEB1 NM_0<br>01323666 | TF<br>BS | TF<br>BS | 84<br>4  | 85<br>1  | 1 | - | . | TF=PITX1;class=Home<br>o domain<br>factors;sequence=CTA<br>ATCCC                |
| ZEB1 NM_0<br>01323642 | TF<br>BS | TF<br>BS | 23<br>00 | 23<br>05 | 1 | + | . | TF=ZNF354C;class=C2<br>H2 zinc finger<br>factors;sequence=ATC<br>CAC            |
| ZEB1 NM_0<br>01323642 | TF<br>BS | TF<br>BS | 14<br>42 | 14<br>47 | 1 | - | . | TF=ZNF354C;class=C2<br>H2 zinc finger<br>factors;sequence=ATC<br>CAC            |
| ZEB1 NM_0<br>01323642 | TF<br>BS | TF<br>BS | 75       | 81       | 1 | - | . | TF=MEIS1;class=Hom<br>eo domain<br>factors;sequence=TTG<br>ACAG                 |
| ZEB1 NM_0<br>01323642 | TF<br>BS | TF<br>BS | 67<br>4  | 68<br>1  | 1 | - | . | TF=HOXB4;class=Ho<br>meo domain<br>factors;sequence=ATC                         |

|                  |          |          |          |          |   |   |   |                                                                       |
|------------------|----------|----------|----------|----------|---|---|---|-----------------------------------------------------------------------|
| ZEB1 NM_01323642 | TF<br>BS | TF<br>BS | 67<br>4  | 68<br>1  | 1 | - | . | ATTAG<br>TF=HOXD4;class=Homeo domain<br>factors;sequence=ATC<br>ATTAG |
| ZEB1 NM_01323642 | TF<br>BS | TF<br>BS | 61<br>1  | 61<br>9  | 1 | - | . | TF=IRF6;class=Tryptophan cluster<br>factors;sequence=ACCGAAACT        |
| ZEB1 NM_01323642 | TF<br>BS | TF<br>BS | 10<br>14 | 10<br>23 | 1 | - | . | TF=ZKSCAN1;class=C2H2 zinc finger<br>factors;sequence=ATAGTAGGTG      |
| ZEB1 NM_01174096 | TF<br>BS | TF<br>BS | 23<br>00 | 23<br>05 | 1 | + | . | TF=ZNF354C;class=C2H2 zinc finger<br>factors;sequence=ATCCAC          |
| ZEB1 NM_01174096 | TF<br>BS | TF<br>BS | 10<br>44 | 10<br>49 | 1 | - | . | TF=ZNF354C;class=C2H2 zinc finger<br>factors;sequence=ATCCAC          |
| ZEB1 NM_01174096 | TF<br>BS | TF<br>BS | 27<br>6  | 28<br>3  | 1 | - | . | TF=HOXB4;class=Homeo domain<br>factors;sequence=ATC<br>ATTAG          |
| ZEB1 NM_01174096 | TF<br>BS | TF<br>BS | 27<br>6  | 28<br>3  | 1 | - | . | TF=HOXD4;class=Homeo domain<br>factors;sequence=ATC<br>ATTAG          |
| ZEB1 NM_01174096 | TF<br>BS | TF<br>BS | 21<br>3  | 22<br>1  | 1 | - | . | TF=IRF6;class=Tryptophan cluster<br>factors;sequence=ACCGAAACT        |
| ZEB1 NM_01174096 | TF<br>BS | TF<br>BS | 61<br>6  | 62<br>5  | 1 | - | . | TF=ZKSCAN1;class=C2H2 zinc finger<br>factors;sequence=ATAGTAGGTG      |
| ZEB1 NM_030751   | TF<br>BS | TF<br>BS | 23<br>00 | 23<br>05 | 1 | + | . | TF=ZNF354C;class=C2H2 zinc finger<br>factors;sequence=ATCCAC          |
| ZEB1 NM_030751   | TF<br>BS | TF<br>BS | 10<br>44 | 10<br>49 | 1 | - | . | TF=ZNF354C;class=C2H2 zinc finger<br>factors;sequence=ATC             |



|                  |          |          |          |          |   |   |   |                                                                      |
|------------------|----------|----------|----------|----------|---|---|---|----------------------------------------------------------------------|
|                  |          |          |          |          |   |   |   | CAC                                                                  |
| ZEB1 NM_030751   | TF<br>BS | TF<br>BS | 27<br>6  | 28<br>3  | 1 | - | . | TF=HOXB4;class=Homeo domain<br>factors;sequence=ATC<br>ATTAG         |
| ZEB1 NM_030751   | TF<br>BS | TF<br>BS | 27<br>6  | 28<br>3  | 1 | - | . | TF=HOXD4;class=Homeo domain<br>factors;sequence=ATC<br>ATTAG         |
| ZEB1 NM_030751   | TF<br>BS | TF<br>BS | 21<br>3  | 22<br>1  | 1 | - | . | TF=IRF6;class=Tryptophan cluster<br>factors;sequence=ACCGAAACT       |
| ZEB1 NM_030751   | TF<br>BS | TF<br>BS | 61<br>6  | 62<br>5  | 1 | - | . | TF=ZKSCAN1;class=C2H2 zinc finger<br>factors;sequence=ATAGTAGGTG     |
| ZEB1 NM_01323665 | TF<br>BS | TF<br>BS | 23<br>00 | 23<br>05 | 1 | + | . | TF=ZNF354C;class=C2H2 zinc finger<br>factors;sequence=ATCCAC         |
| ZEB1 NM_01323665 | TF<br>BS | TF<br>BS | 14<br>77 | 14<br>83 | 1 | + | . | TF=NFATC2;class=Rel homology region (RHR)<br>factors;sequence=TTTCCA |
| ZEB1 NM_01323665 | TF<br>BS | TF<br>BS | 84<br>4  | 85<br>1  | 1 | - | . | TF=PITX1;class=Homeo domain<br>factors;sequence=CTAATCCC             |
| ZEB1 NM_01323664 | TF<br>BS | TF<br>BS | 23<br>00 | 23<br>05 | 1 | + | . | TF=ZNF354C;class=C2H2 zinc finger<br>factors;sequence=ATCCAC         |
| ZEB1 NM_01323664 | TF<br>BS | TF<br>BS | 14<br>77 | 14<br>83 | 1 | + | . | TF=NFATC2;class=Rel homology region (RHR)<br>factors;sequence=TTTCCA |
| ZEB1 NM_01323664 | TF<br>BS | TF<br>BS | 84<br>4  | 85<br>1  | 1 | - | . | TF=PITX1;class=Homeo domain<br>factors;sequence=CTAATCCC             |
| ZEB1 NM_01323664 | TF<br>BS | TF<br>BS | 23<br>00 | 23<br>05 | 1 | + | . | TF=ZNF354C;class=C2H2 zinc finger                                    |

|                       |          |          |          |          |   |   |   |                                                                                 |
|-----------------------|----------|----------|----------|----------|---|---|---|---------------------------------------------------------------------------------|
| 01323663              | BS       | BS       | 00       | 05       |   |   |   | H2 zinc finger<br>factors;sequence=ATC<br>CAC                                   |
| ZEB1 NM_0<br>01323663 | TF<br>BS | TF<br>BS | 14<br>77 | 14<br>83 | 1 | + | . | TF=NFATC2;class=Rel<br>homology region<br>(RHR)<br>factors;sequence=TTTT<br>CCA |
| ZEB1 NM_0<br>01323663 | TF<br>BS | TF<br>BS | 84<br>4  | 85<br>1  | 1 | - | . | TF=PITX1;class=Home<br>o domain<br>factors;sequence=CTA<br>ATCCC                |
| ZEB1 NM_0<br>01323662 | TF<br>BS | TF<br>BS | 23<br>00 | 23<br>05 | 1 | + | . | TF=ZNF354C;class=C2<br>H2 zinc finger<br>factors;sequence=ATC<br>CAC            |
| ZEB1 NM_0<br>01323662 | TF<br>BS | TF<br>BS | 14<br>77 | 14<br>83 | 1 | + | . | TF=NFATC2;class=Rel<br>homology region<br>(RHR)<br>factors;sequence=TTTT<br>CCA |
| ZEB1 NM_0<br>01323662 | TF<br>BS | TF<br>BS | 84<br>4  | 85<br>1  | 1 | - | . | TF=PITX1;class=Home<br>o domain<br>factors;sequence=CTA<br>ATCCC                |
| ZEB1 NM_0<br>01323661 | TF<br>BS | TF<br>BS | 23<br>00 | 23<br>05 | 1 | + | . | TF=ZNF354C;class=C2<br>H2 zinc finger<br>factors;sequence=ATC<br>CAC            |
| ZEB1 NM_0<br>01323661 | TF<br>BS | TF<br>BS | 19<br>97 | 20<br>07 | 1 | - | . | TF=CDX4;class=Home<br>o domain<br>factors;sequence=GGC<br>AATAAAAC              |
| ZEB1 NM_0<br>01323661 | TF<br>BS | TF<br>BS | 19<br>97 | 20<br>06 | 1 | - | . | TF=HOXD9;class=Ho<br>meo domain<br>factors;sequence=GCA<br>ATAAAAC              |
| ZEB1 NM_0<br>01323661 | TF<br>BS | TF<br>BS | 14<br>91 | 14<br>98 | 1 | - | . | TF=PITX1;class=Home<br>o domain<br>factors;sequence=CTA<br>ATCCC                |
| ZEB1 NM_0<br>01323660 | TF<br>BS | TF<br>BS | 23<br>00 | 23<br>05 | 1 | + | . | TF=ZNF354C;class=C2<br>H2 zinc finger<br>factors;sequence=ATC                   |

|                  |          |          |          |          |                 |   |   |                                                                                 |
|------------------|----------|----------|----------|----------|-----------------|---|---|---------------------------------------------------------------------------------|
|                  |          |          |          |          |                 |   |   | CAC                                                                             |
| ZEB1 NM_01323660 | TF<br>BS | TF<br>BS | 19<br>97 | 20<br>07 | 1               | - | . | TF=CDX4;class=Home<br>o domain<br>factors;sequence=GGC<br>AATAAAAC              |
| ZEB1 NM_01323660 | TF<br>BS | TF<br>BS | 19<br>97 | 20<br>06 | 1               | - | . | TF=HOXD9;class=Ho<br>meo domain<br>factors;sequence=GCA<br>ATAAAAC              |
| ZEB1 NM_01323660 | TF<br>BS | TF<br>BS | 14<br>91 | 14<br>98 | 1               | - | . | TF=PITX1;class=Home<br>o domain<br>factors;sequence=CTA<br>ATCCC                |
| ZEB1 NM_01323659 | TF<br>BS | TF<br>BS | 23<br>00 | 23<br>05 | 1               | + | . | TF=ZNF354C;class=C2<br>H2 zinc finger<br>factors;sequence=ATC<br>CAC            |
| ZEB1 NM_01323659 | TF<br>BS | TF<br>BS | 19<br>97 | 20<br>07 | 1               | - | . | TF=CDX4;class=Home<br>o domain<br>factors;sequence=GGC<br>AATAAAAC              |
| ZEB1 NM_01323659 | TF<br>BS | TF<br>BS | 19<br>97 | 20<br>06 | 1               | - | . | TF=HOXD9;class=Ho<br>meo domain<br>factors;sequence=GCA<br>ATAAAAC              |
| ZEB1 NM_01323659 | TF<br>BS | TF<br>BS | 14<br>91 | 14<br>98 | 1               | - | . | TF=PITX1;class=Home<br>o domain<br>factors;sequence=CTA<br>ATCCC                |
| ZEB1 NM_01174094 | TF<br>BS | TF<br>BS | 23<br>00 | 23<br>05 | 1               | + | . | TF=ZNF354C;class=C2<br>H2 zinc finger<br>factors;sequence=ATC<br>CAC            |
| ZEB1 NM_01174094 | TF<br>BS | TF<br>BS | 14<br>77 | 14<br>83 | 1               | + | . | TF=NFATC2;class=Rel<br>homology region<br>(RHR)<br>factors;sequence=TTTT<br>CCA |
| ZEB1 NM_01174094 | TF<br>BS | TF<br>BS | 84<br>4  | 85<br>1  | 1               | - | . | TF=PITX1;class=Home<br>o domain<br>factors;sequence=CTA<br>ATCCC                |
| ZEB1 NM_01128128 | TF<br>BS | TF<br>BS | 19<br>09 | 19<br>18 | 0.9997<br>42203 | + | . | TF=KLF5;class=C2H2<br>zinc finger                                               |

|                       |          |          |          |          |                 |   |   |                                                                      |
|-----------------------|----------|----------|----------|----------|-----------------|---|---|----------------------------------------------------------------------|
|                       |          |          |          |          |                 |   |   | factors;sequence=GCC<br>CCACCCC                                      |
| ZEB1 NM_0<br>01323673 | TF<br>BS | TF<br>BS | 14<br>50 | 14<br>59 | 0.9997<br>42203 | + | . | TF=KLF5;class=C2H2<br>zinc finger<br>factors;sequence=GCC<br>CCACCCC |
| ZEB1 NM_0<br>01323678 | TF<br>BS | TF<br>BS | 19<br>09 | 19<br>18 | 0.9997<br>42203 | + | . | TF=KLF5;class=C2H2<br>zinc finger<br>factors;sequence=GCC<br>CCACCCC |
| ZEB1 NM_0<br>01323677 | TF<br>BS | TF<br>BS | 14<br>50 | 14<br>59 | 0.9997<br>42203 | + | . | TF=KLF5;class=C2H2<br>zinc finger<br>factors;sequence=GCC<br>CCACCCC |
| ZEB1 NM_0<br>01323676 | TF<br>BS | TF<br>BS | 14<br>50 | 14<br>59 | 0.9997<br>42203 | + | . | TF=KLF5;class=C2H2<br>zinc finger<br>factors;sequence=GCC<br>CCACCCC |
| ZEB1 NM_0<br>01323675 | TF<br>BS | TF<br>BS | 14<br>50 | 14<br>59 | 0.9997<br>42203 | + | . | TF=KLF5;class=C2H2<br>zinc finger<br>factors;sequence=GCC<br>CCACCCC |
| ZEB1 NM_0<br>01323672 | TF<br>BS | TF<br>BS | 14<br>50 | 14<br>59 | 0.9997<br>42203 | + | . | TF=KLF5;class=C2H2<br>zinc finger<br>factors;sequence=GCC<br>CCACCCC |
| ZEB1 NM_0<br>01323671 | TF<br>BS | TF<br>BS | 14<br>50 | 14<br>59 | 0.9997<br>42203 | + | . | TF=KLF5;class=C2H2<br>zinc finger<br>factors;sequence=GCC<br>CCACCCC |
| ZEB1 NM_0<br>01323666 | TF<br>BS | TF<br>BS | 19<br>09 | 19<br>18 | 0.9997<br>42203 | + | . | TF=KLF5;class=C2H2<br>zinc finger<br>factors;sequence=GCC<br>CCACCCC |
| ZEB1 NM_0<br>01323665 | TF<br>BS | TF<br>BS | 19<br>09 | 19<br>18 | 0.9997<br>42203 | + | . | TF=KLF5;class=C2H2<br>zinc finger<br>factors;sequence=GCC<br>CCACCCC |
| ZEB1 NM_0<br>01323664 | TF<br>BS | TF<br>BS | 19<br>09 | 19<br>18 | 0.9997<br>42203 | + | . | TF=KLF5;class=C2H2<br>zinc finger<br>factors;sequence=GCC<br>CCACCCC |
| ZEB1 NM_0<br>01323663 | TF<br>BS | TF<br>BS | 19<br>09 | 19<br>18 | 0.9997<br>42203 | + | . | TF=KLF5;class=C2H2<br>zinc finger                                    |

|                       |          |          |          |          |                 |   |   |                                                                      |
|-----------------------|----------|----------|----------|----------|-----------------|---|---|----------------------------------------------------------------------|
|                       |          |          |          |          |                 |   |   | factors;sequence=GCC<br>CCACCCC                                      |
| ZEB1 NM_0<br>01323662 | TF<br>BS | TF<br>BS | 19<br>09 | 19<br>18 | 0.9997<br>42203 | + | . | TF=KLF5;class=C2H2<br>zinc finger<br>factors;sequence=GCC<br>CCACCCC |
| ZEB1 NM_0<br>01174094 | TF<br>BS | TF<br>BS | 19<br>09 | 19<br>18 | 0.9997<br>42203 | + | . | TF=KLF5;class=C2H2<br>zinc finger<br>factors;sequence=GCC<br>CCACCCC |
| ZEB1 NM_0<br>01323647 | TF<br>BS | TF<br>BS | 19<br>26 | 19<br>36 | 0.9997<br>38076 | - | . | TF=MAZ;class=C2H2<br>zinc finger<br>factors;sequence=CCC<br>CCCTCCCC |
| ZEB1 NM_0<br>01323674 | TF<br>BS | TF<br>BS | 19<br>26 | 19<br>36 | 0.9997<br>38076 | - | . | TF=MAZ;class=C2H2<br>zinc finger<br>factors;sequence=CCC<br>CCCTCCCC |
| ZEB1 NM_0<br>01323658 | TF<br>BS | TF<br>BS | 13<br>74 | 13<br>84 | 0.9997<br>38076 | - | . | TF=MAZ;class=C2H2<br>zinc finger<br>factors;sequence=CCC<br>CCCTCCCC |
| ZEB1 NM_0<br>01323657 | TF<br>BS | TF<br>BS | 13<br>74 | 13<br>84 | 0.9997<br>38076 | - | . | TF=MAZ;class=C2H2<br>zinc finger<br>factors;sequence=CCC<br>CCCTCCCC |
| ZEB1 NM_0<br>01323650 | TF<br>BS | TF<br>BS | 19<br>26 | 19<br>36 | 0.9997<br>38076 | - | . | TF=MAZ;class=C2H2<br>zinc finger<br>factors;sequence=CCC<br>CCCTCCCC |
| ZEB1 NM_0<br>01323648 | TF<br>BS | TF<br>BS | 19<br>26 | 19<br>36 | 0.9997<br>38076 | - | . | TF=MAZ;class=C2H2<br>zinc finger<br>factors;sequence=CCC<br>CCCTCCCC |
| ZEB1 NM_0<br>01174095 | TF<br>BS | TF<br>BS | 19<br>26 | 19<br>36 | 0.9997<br>38076 | - | . | TF=MAZ;class=C2H2<br>zinc finger<br>factors;sequence=CCC<br>CCCTCCCC |
| ZEB1 NM_0<br>01174093 | TF<br>BS | TF<br>BS | 19<br>26 | 19<br>36 | 0.9997<br>38076 | - | . | TF=MAZ;class=C2H2<br>zinc finger<br>factors;sequence=CCC<br>CCCTCCCC |
| ZEB1 NM_0<br>01323656 | TF<br>BS | TF<br>BS | 13<br>74 | 13<br>84 | 0.9997<br>38076 | - | . | TF=MAZ;class=C2H2<br>zinc finger                                     |

|                       |          |          |          |          |                 |   |   |                                                                      |
|-----------------------|----------|----------|----------|----------|-----------------|---|---|----------------------------------------------------------------------|
|                       |          |          |          |          |                 |   |   | factors;sequence=CCC<br>CCCTCCCC                                     |
| ZEB1 NM_0<br>01323655 | TF<br>BS | TF<br>BS | 19<br>26 | 19<br>36 | 0.9997<br>38076 | - | . | TF=MAZ;class=C2H2<br>zinc finger<br>factors;sequence=CCC<br>CCCTCCCC |
| ZEB1 NM_0<br>01323654 | TF<br>BS | TF<br>BS | 19<br>26 | 19<br>36 | 0.9997<br>38076 | - | . | TF=MAZ;class=C2H2<br>zinc finger<br>factors;sequence=CCC<br>CCCTCCCC |
| ZEB1 NM_0<br>01323653 | TF<br>BS | TF<br>BS | 19<br>26 | 19<br>36 | 0.9997<br>38076 | - | . | TF=MAZ;class=C2H2<br>zinc finger<br>factors;sequence=CCC<br>CCCTCCCC |
| ZEB1 NM_0<br>01323652 | TF<br>BS | TF<br>BS | 19<br>26 | 19<br>36 | 0.9997<br>38076 | - | . | TF=MAZ;class=C2H2<br>zinc finger<br>factors;sequence=CCC<br>CCCTCCCC |
| ZEB1 NM_0<br>01323651 | TF<br>BS | TF<br>BS | 19<br>26 | 19<br>36 | 0.9997<br>38076 | - | . | TF=MAZ;class=C2H2<br>zinc finger<br>factors;sequence=CCC<br>CCCTCCCC |
| ZEB1 NM_0<br>01323649 | TF<br>BS | TF<br>BS | 19<br>26 | 19<br>36 | 0.9997<br>38076 | - | . | TF=MAZ;class=C2H2<br>zinc finger<br>factors;sequence=CCC<br>CCCTCCCC |
| ZEB1 NM_0<br>01174096 | TF<br>BS | TF<br>BS | 19<br>26 | 19<br>36 | 0.9997<br>38076 | - | . | TF=MAZ;class=C2H2<br>zinc finger<br>factors;sequence=CCC<br>CCCTCCCC |
| ZEB1 NM_0<br>30751    | TF<br>BS | TF<br>BS | 19<br>26 | 19<br>36 | 0.9997<br>38076 | - | . | TF=MAZ;class=C2H2<br>zinc finger<br>factors;sequence=CCC<br>CCCTCCCC |
| ZEB1 NM_0<br>01323661 | TF<br>BS | TF<br>BS | 58<br>8  | 59<br>8  | 0.9997<br>38076 | - | . | TF=MAZ;class=C2H2<br>zinc finger<br>factors;sequence=CCC<br>CCCTCCCC |
| ZEB1 NM_0<br>01323660 | TF<br>BS | TF<br>BS | 58<br>8  | 59<br>8  | 0.9997<br>38076 | - | . | TF=MAZ;class=C2H2<br>zinc finger<br>factors;sequence=CCC<br>CCCTCCCC |
| ZEB1 NM_0<br>01323659 | TF<br>BS | TF<br>BS | 58<br>8  | 59<br>8  | 0.9997<br>38076 | - | . | TF=MAZ;class=C2H2<br>zinc finger                                     |

|                       |          |          |          |          |                 |   |   |                                                                  |
|-----------------------|----------|----------|----------|----------|-----------------|---|---|------------------------------------------------------------------|
|                       |          |          |          |          |                 |   |   | factors;sequence=CCC<br>CCCTCCCC                                 |
| ZEB1 NM_0<br>01323647 | TF<br>BS | TF<br>BS | 26<br>6  | 27<br>3  | 0.9995<br>65985 | + | . | TF=HOXC4;class=Ho<br>meo domain<br>factors;sequence=ATC<br>ATTAA |
| ZEB1 NM_0<br>01323641 | TF<br>BS | TF<br>BS | 66<br>4  | 67<br>1  | 0.9995<br>65985 | + | . | TF=HOXC4;class=Ho<br>meo domain<br>factors;sequence=ATC<br>ATTAA |
| ZEB1 NM_0<br>01323638 | TF<br>BS | TF<br>BS | 10<br>65 | 10<br>72 | 0.9995<br>65985 | + | . | TF=HOXC4;class=Ho<br>meo domain<br>factors;sequence=ATC<br>ATTAA |
| ZEB1 NM_0<br>01323644 | TF<br>BS | TF<br>BS | 66<br>4  | 67<br>1  | 0.9995<br>65985 | + | . | TF=HOXC4;class=Ho<br>meo domain<br>factors;sequence=ATC<br>ATTAA |
| ZEB1 NM_0<br>01323643 | TF<br>BS | TF<br>BS | 10<br>65 | 10<br>72 | 0.9995<br>65985 | + | . | TF=HOXC4;class=Ho<br>meo domain<br>factors;sequence=ATC<br>ATTAA |
| ZEB1 NM_0<br>01323674 | TF<br>BS | TF<br>BS | 26<br>6  | 27<br>3  | 0.9995<br>65985 | + | . | TF=HOXC4;class=Ho<br>meo domain<br>factors;sequence=ATC<br>ATTAA |
| ZEB1 NM_0<br>01323673 | TF<br>BS | TF<br>BS | 16<br>40 | 16<br>47 | 0.9995<br>65985 | + | . | TF=HOXC4;class=Ho<br>meo domain<br>factors;sequence=ATC<br>ATTAA |
| ZEB1 NM_0<br>01323650 | TF<br>BS | TF<br>BS | 26<br>6  | 27<br>3  | 0.9995<br>65985 | + | . | TF=HOXC4;class=Ho<br>meo domain<br>factors;sequence=ATC<br>ATTAA |
| ZEB1 NM_0<br>01323648 | TF<br>BS | TF<br>BS | 26<br>6  | 27<br>3  | 0.9995<br>65985 | + | . | TF=HOXC4;class=Ho<br>meo domain<br>factors;sequence=ATC<br>ATTAA |
| ZEB1 NM_0<br>01174095 | TF<br>BS | TF<br>BS | 26<br>6  | 27<br>3  | 0.9995<br>65985 | + | . | TF=HOXC4;class=Ho<br>meo domain<br>factors;sequence=ATC<br>ATTAA |
| ZEB1 NM_0<br>01323646 | TF<br>BS | TF<br>BS | 66<br>4  | 67<br>1  | 0.9995<br>65985 | + | . | TF=HOXC4;class=Ho<br>meo domain                                  |

|                       |          |          |          |          |                 |   |   |                                                                  |
|-----------------------|----------|----------|----------|----------|-----------------|---|---|------------------------------------------------------------------|
|                       |          |          |          |          |                 |   |   | factors;sequence=ATC<br>ATTAA                                    |
| ZEB1 NM_0<br>01323645 | TF<br>BS | TF<br>BS | 66<br>4  | 67<br>1  | 0.9995<br>65985 | + | . | TF=HOXC4;class=Ho<br>meo domain<br>factors;sequence=ATC<br>ATTAA |
| ZEB1 NM_0<br>01174093 | TF<br>BS | TF<br>BS | 26<br>6  | 27<br>3  | 0.9995<br>65985 | + | . | TF=HOXC4;class=Ho<br>meo domain<br>factors;sequence=ATC<br>ATTAA |
| ZEB1 NM_0<br>01323655 | TF<br>BS | TF<br>BS | 26<br>6  | 27<br>3  | 0.9995<br>65985 | + | . | TF=HOXC4;class=Ho<br>meo domain<br>factors;sequence=ATC<br>ATTAA |
| ZEB1 NM_0<br>01323654 | TF<br>BS | TF<br>BS | 26<br>6  | 27<br>3  | 0.9995<br>65985 | + | . | TF=HOXC4;class=Ho<br>meo domain<br>factors;sequence=ATC<br>ATTAA |
| ZEB1 NM_0<br>01323653 | TF<br>BS | TF<br>BS | 26<br>6  | 27<br>3  | 0.9995<br>65985 | + | . | TF=HOXC4;class=Ho<br>meo domain<br>factors;sequence=ATC<br>ATTAA |
| ZEB1 NM_0<br>01323652 | TF<br>BS | TF<br>BS | 26<br>6  | 27<br>3  | 0.9995<br>65985 | + | . | TF=HOXC4;class=Ho<br>meo domain<br>factors;sequence=ATC<br>ATTAA |
| ZEB1 NM_0<br>01323651 | TF<br>BS | TF<br>BS | 26<br>6  | 27<br>3  | 0.9995<br>65985 | + | . | TF=HOXC4;class=Ho<br>meo domain<br>factors;sequence=ATC<br>ATTAA |
| ZEB1 NM_0<br>01323677 | TF<br>BS | TF<br>BS | 16<br>40 | 16<br>47 | 0.9995<br>65985 | + | . | TF=HOXC4;class=Ho<br>meo domain<br>factors;sequence=ATC<br>ATTAA |
| ZEB1 NM_0<br>01323676 | TF<br>BS | TF<br>BS | 16<br>40 | 16<br>47 | 0.9995<br>65985 | + | . | TF=HOXC4;class=Ho<br>meo domain<br>factors;sequence=ATC<br>ATTAA |
| ZEB1 NM_0<br>01323649 | TF<br>BS | TF<br>BS | 26<br>6  | 27<br>3  | 0.9995<br>65985 | + | . | TF=HOXC4;class=Ho<br>meo domain<br>factors;sequence=ATC<br>ATTAA |
| ZEB1 NM_0<br>01323675 | TF<br>BS | TF<br>BS | 16<br>40 | 16<br>47 | 0.9995<br>65985 | + | . | TF=HOXC4;class=Ho<br>meo domain                                  |



|                       |          |          |          |          |                 |   |   |                                                                                              |
|-----------------------|----------|----------|----------|----------|-----------------|---|---|----------------------------------------------------------------------------------------------|
|                       |          |          |          |          |                 |   |   | factors;sequence=ATC<br>ATTAA                                                                |
| ZEB1 NM_0<br>01323672 | TF<br>BS | TF<br>BS | 16<br>40 | 16<br>47 | 0.9995<br>65985 | + | . | TF=HOXC4;class=Ho<br>meo domain<br>factors;sequence=ATC<br>ATTAA                             |
| ZEB1 NM_0<br>01323671 | TF<br>BS | TF<br>BS | 16<br>40 | 16<br>47 | 0.9995<br>65985 | + | . | TF=HOXC4;class=Ho<br>meo domain<br>factors;sequence=ATC<br>ATTAA                             |
| ZEB1 NM_0<br>01323642 | TF<br>BS | TF<br>BS | 66<br>4  | 67<br>1  | 0.9995<br>65985 | + | . | TF=HOXC4;class=Ho<br>meo domain<br>factors;sequence=ATC<br>ATTAA                             |
| ZEB1 NM_0<br>01174096 | TF<br>BS | TF<br>BS | 26<br>6  | 27<br>3  | 0.9995<br>65985 | + | . | TF=HOXC4;class=Ho<br>meo domain<br>factors;sequence=ATC<br>ATTAA                             |
| ZEB1 NM_0<br>30751    | TF<br>BS | TF<br>BS | 26<br>6  | 27<br>3  | 0.9995<br>65985 | + | . | TF=HOXC4;class=Ho<br>meo domain<br>factors;sequence=ATC<br>ATTAA                             |
| ZEB1 NM_0<br>01323641 | TF<br>BS | TF<br>BS | 96       | 10<br>3  | 0.9994<br>17997 | + | . | TF=NR2C2(var.2);class<br>=Nuclear receptors with<br>C4 zinc<br>fingers;sequence=AAG<br>GTCAA |
| ZEB1 NM_0<br>01323638 | TF<br>BS | TF<br>BS | 49<br>7  | 50<br>4  | 0.9994<br>17997 | + | . | TF=NR2C2(var.2);class<br>=Nuclear receptors with<br>C4 zinc<br>fingers;sequence=AAG<br>GTCAA |
| ZEB1 NM_0<br>01323644 | TF<br>BS | TF<br>BS | 96       | 10<br>3  | 0.9994<br>17997 | + | . | TF=NR2C2(var.2);class<br>=Nuclear receptors with<br>C4 zinc<br>fingers;sequence=AAG<br>GTCAA |
| ZEB1 NM_0<br>01323643 | TF<br>BS | TF<br>BS | 49<br>7  | 50<br>4  | 0.9994<br>17997 | + | . | TF=NR2C2(var.2);class<br>=Nuclear receptors with<br>C4 zinc<br>fingers;sequence=AAG<br>GTCAA |
| ZEB1 NM_0<br>01323646 | TF<br>BS | TF<br>BS | 96       | 10<br>3  | 0.9994<br>17997 | + | . | TF=NR2C2(var.2);class<br>=Nuclear receptors with                                             |

|                       |          |          |          |          |                 |   |   |                                                                                              |
|-----------------------|----------|----------|----------|----------|-----------------|---|---|----------------------------------------------------------------------------------------------|
|                       |          |          |          |          |                 |   |   | C4 zinc<br>fingers;sequence=AAG<br>GTCAA                                                     |
| ZEB1 NM_0<br>01323645 | TF<br>BS | TF<br>BS | 96       | 10<br>3  | 0.9994<br>17997 | + | . | TF=NR2C2(var.2);class<br>=Nuclear receptors with<br>C4 zinc<br>fingers;sequence=AAG<br>GTCAA |
| ZEB1 NM_0<br>01323642 | TF<br>BS | TF<br>BS | 96       | 10<br>3  | 0.9994<br>17997 | + | . | TF=NR2C2(var.2);class<br>=Nuclear receptors with<br>C4 zinc<br>fingers;sequence=AAG<br>GTCAA |
| ZEB1 NM_0<br>01323647 | TF<br>BS | TF<br>BS | 26<br>6  | 27<br>3  | 0.9993<br>31142 | + | . | TF=HOXD4;class=Ho<br>meo domain<br>factors;sequence=ATC<br>ATTAA                             |
| ZEB1 NM_0<br>01323641 | TF<br>BS | TF<br>BS | 66<br>4  | 67<br>1  | 0.9993<br>31142 | + | . | TF=HOXD4;class=Ho<br>meo domain<br>factors;sequence=ATC<br>ATTAA                             |
| ZEB1 NM_0<br>01323638 | TF<br>BS | TF<br>BS | 10<br>65 | 10<br>72 | 0.9993<br>31142 | + | . | TF=HOXD4;class=Ho<br>meo domain<br>factors;sequence=ATC<br>ATTAA                             |
| ZEB1 NM_0<br>01323644 | TF<br>BS | TF<br>BS | 66<br>4  | 67<br>1  | 0.9993<br>31142 | + | . | TF=HOXD4;class=Ho<br>meo domain<br>factors;sequence=ATC<br>ATTAA                             |
| ZEB1 NM_0<br>01323643 | TF<br>BS | TF<br>BS | 10<br>65 | 10<br>72 | 0.9993<br>31142 | + | . | TF=HOXD4;class=Ho<br>meo domain<br>factors;sequence=ATC<br>ATTAA                             |
| ZEB1 NM_0<br>01323674 | TF<br>BS | TF<br>BS | 26<br>6  | 27<br>3  | 0.9993<br>31142 | + | . | TF=HOXD4;class=Ho<br>meo domain<br>factors;sequence=ATC<br>ATTAA                             |
| ZEB1 NM_0<br>01323673 | TF<br>BS | TF<br>BS | 16<br>40 | 16<br>47 | 0.9993<br>31142 | + | . | TF=HOXD4;class=Ho<br>meo domain<br>factors;sequence=ATC<br>ATTAA                             |
| ZEB1 NM_0<br>01323650 | TF<br>BS | TF<br>BS | 26<br>6  | 27<br>3  | 0.9993<br>31142 | + | . | TF=HOXD4;class=Ho<br>meo domain<br>factors;sequence=ATC                                      |

|                  |          |          |          |          |                 |   |   |                                                              |
|------------------|----------|----------|----------|----------|-----------------|---|---|--------------------------------------------------------------|
|                  |          |          |          |          |                 |   |   | ATTAA                                                        |
| ZEB1 NM_01323648 | TF<br>BS | TF<br>BS | 26<br>6  | 27<br>3  | 0.9993<br>31142 | + | . | TF=HOXD4;class=Homeo domain<br>factors;sequence=ATC<br>ATTAA |
| ZEB1 NM_01174095 | TF<br>BS | TF<br>BS | 26<br>6  | 27<br>3  | 0.9993<br>31142 | + | . | TF=HOXD4;class=Homeo domain<br>factors;sequence=ATC<br>ATTAA |
| ZEB1 NM_01323646 | TF<br>BS | TF<br>BS | 66<br>4  | 67<br>1  | 0.9993<br>31142 | + | . | TF=HOXD4;class=Homeo domain<br>factors;sequence=ATC<br>ATTAA |
| ZEB1 NM_01323645 | TF<br>BS | TF<br>BS | 66<br>4  | 67<br>1  | 0.9993<br>31142 | + | . | TF=HOXD4;class=Homeo domain<br>factors;sequence=ATC<br>ATTAA |
| ZEB1 NM_01174093 | TF<br>BS | TF<br>BS | 26<br>6  | 27<br>3  | 0.9993<br>31142 | + | . | TF=HOXD4;class=Homeo domain<br>factors;sequence=ATC<br>ATTAA |
| ZEB1 NM_01323655 | TF<br>BS | TF<br>BS | 26<br>6  | 27<br>3  | 0.9993<br>31142 | + | . | TF=HOXD4;class=Homeo domain<br>factors;sequence=ATC<br>ATTAA |
| ZEB1 NM_01323654 | TF<br>BS | TF<br>BS | 26<br>6  | 27<br>3  | 0.9993<br>31142 | + | . | TF=HOXD4;class=Homeo domain<br>factors;sequence=ATC<br>ATTAA |
| ZEB1 NM_01323653 | TF<br>BS | TF<br>BS | 26<br>6  | 27<br>3  | 0.9993<br>31142 | + | . | TF=HOXD4;class=Homeo domain<br>factors;sequence=ATC<br>ATTAA |
| ZEB1 NM_01323652 | TF<br>BS | TF<br>BS | 26<br>6  | 27<br>3  | 0.9993<br>31142 | + | . | TF=HOXD4;class=Homeo domain<br>factors;sequence=ATC<br>ATTAA |
| ZEB1 NM_01323651 | TF<br>BS | TF<br>BS | 26<br>6  | 27<br>3  | 0.9993<br>31142 | + | . | TF=HOXD4;class=Homeo domain<br>factors;sequence=ATC<br>ATTAA |
| ZEB1 NM_01323677 | TF<br>BS | TF<br>BS | 16<br>40 | 16<br>47 | 0.9993<br>31142 | + | . | TF=HOXD4;class=Homeo domain<br>factors;sequence=ATC          |

|                  |          |          |          |          |                 |   |   |                                                              |
|------------------|----------|----------|----------|----------|-----------------|---|---|--------------------------------------------------------------|
|                  |          |          |          |          |                 |   |   | ATTAA                                                        |
| ZEB1 NM_01323676 | TF<br>BS | TF<br>BS | 16<br>40 | 16<br>47 | 0.9993<br>31142 | + | . | TF=HOXD4;class=Homeo domain<br>factors;sequence=ATC<br>ATTAA |
| ZEB1 NM_01323649 | TF<br>BS | TF<br>BS | 26<br>6  | 27<br>3  | 0.9993<br>31142 | + | . | TF=HOXD4;class=Homeo domain<br>factors;sequence=ATC<br>ATTAA |
| ZEB1 NM_01323675 | TF<br>BS | TF<br>BS | 16<br>40 | 16<br>47 | 0.9993<br>31142 | + | . | TF=HOXD4;class=Homeo domain<br>factors;sequence=ATC<br>ATTAA |
| ZEB1 NM_01323672 | TF<br>BS | TF<br>BS | 16<br>40 | 16<br>47 | 0.9993<br>31142 | + | . | TF=HOXD4;class=Homeo domain<br>factors;sequence=ATC<br>ATTAA |
| ZEB1 NM_01323671 | TF<br>BS | TF<br>BS | 16<br>40 | 16<br>47 | 0.9993<br>31142 | + | . | TF=HOXD4;class=Homeo domain<br>factors;sequence=ATC<br>ATTAA |
| ZEB1 NM_01323642 | TF<br>BS | TF<br>BS | 66<br>4  | 67<br>1  | 0.9993<br>31142 | + | . | TF=HOXD4;class=Homeo domain<br>factors;sequence=ATC<br>ATTAA |
| ZEB1 NM_01174096 | TF<br>BS | TF<br>BS | 26<br>6  | 27<br>3  | 0.9993<br>31142 | + | . | TF=HOXD4;class=Homeo domain<br>factors;sequence=ATC<br>ATTAA |
| ZEB1 NM_030751   | TF<br>BS | TF<br>BS | 26<br>6  | 27<br>3  | 0.9993<br>31142 | + | . | TF=HOXD4;class=Homeo domain<br>factors;sequence=ATC<br>ATTAA |
| ZEB1 NM_01323647 | TF<br>BS | TF<br>BS | 27<br>6  | 28<br>3  | 0.9992<br>12186 | - | . | TF=HOXC4;class=Homeo domain<br>factors;sequence=ATC<br>ATTAG |
| ZEB1 NM_01323641 | TF<br>BS | TF<br>BS | 67<br>4  | 68<br>1  | 0.9992<br>12186 | - | . | TF=HOXC4;class=Homeo domain<br>factors;sequence=ATC<br>ATTAG |
| ZEB1 NM_01323638 | TF<br>BS | TF<br>BS | 10<br>75 | 10<br>82 | 0.9992<br>12186 | - | . | TF=HOXC4;class=Homeo domain<br>factors;sequence=ATC          |

|                  |          |          |          |          |                 |   |   |                                                              |
|------------------|----------|----------|----------|----------|-----------------|---|---|--------------------------------------------------------------|
|                  |          |          |          |          |                 |   |   | ATTAG                                                        |
| ZEB1 NM_01323644 | TF<br>BS | TF<br>BS | 67<br>4  | 68<br>1  | 0.9992<br>12186 | - | . | TF=HOXC4;class=Homeo domain<br>factors;sequence=ATC<br>ATTAG |
| ZEB1 NM_01323643 | TF<br>BS | TF<br>BS | 10<br>75 | 10<br>82 | 0.9992<br>12186 | - | . | TF=HOXC4;class=Homeo domain<br>factors;sequence=ATC<br>ATTAG |
| ZEB1 NM_01323674 | TF<br>BS | TF<br>BS | 27<br>6  | 28<br>3  | 0.9992<br>12186 | - | . | TF=HOXC4;class=Homeo domain<br>factors;sequence=ATC<br>ATTAG |
| ZEB1 NM_01323650 | TF<br>BS | TF<br>BS | 27<br>6  | 28<br>3  | 0.9992<br>12186 | - | . | TF=HOXC4;class=Homeo domain<br>factors;sequence=ATC<br>ATTAG |
| ZEB1 NM_01323648 | TF<br>BS | TF<br>BS | 27<br>6  | 28<br>3  | 0.9992<br>12186 | - | . | TF=HOXC4;class=Homeo domain<br>factors;sequence=ATC<br>ATTAG |
| ZEB1 NM_01174095 | TF<br>BS | TF<br>BS | 27<br>6  | 28<br>3  | 0.9992<br>12186 | - | . | TF=HOXC4;class=Homeo domain<br>factors;sequence=ATC<br>ATTAG |
| ZEB1 NM_01323646 | TF<br>BS | TF<br>BS | 67<br>4  | 68<br>1  | 0.9992<br>12186 | - | . | TF=HOXC4;class=Homeo domain<br>factors;sequence=ATC<br>ATTAG |
| ZEB1 NM_01323645 | TF<br>BS | TF<br>BS | 67<br>4  | 68<br>1  | 0.9992<br>12186 | - | . | TF=HOXC4;class=Homeo domain<br>factors;sequence=ATC<br>ATTAG |
| ZEB1 NM_01174093 | TF<br>BS | TF<br>BS | 27<br>6  | 28<br>3  | 0.9992<br>12186 | - | . | TF=HOXC4;class=Homeo domain<br>factors;sequence=ATC<br>ATTAG |
| ZEB1 NM_01323655 | TF<br>BS | TF<br>BS | 27<br>6  | 28<br>3  | 0.9992<br>12186 | - | . | TF=HOXC4;class=Homeo domain<br>factors;sequence=ATC<br>ATTAG |
| ZEB1 NM_01323654 | TF<br>BS | TF<br>BS | 27<br>6  | 28<br>3  | 0.9992<br>12186 | - | . | TF=HOXC4;class=Homeo domain<br>factors;sequence=ATC          |

|                  |          |          |         |         |                 |   |   |                                                              |
|------------------|----------|----------|---------|---------|-----------------|---|---|--------------------------------------------------------------|
|                  |          |          |         |         |                 |   |   | ATTAG                                                        |
| ZEB1 NM_01323653 | TF<br>BS | TF<br>BS | 27<br>6 | 28<br>3 | 0.9992<br>12186 | - | . | TF=HOXC4;class=Homeo domain<br>factors;sequence=ATC<br>ATTAG |
| ZEB1 NM_01323652 | TF<br>BS | TF<br>BS | 27<br>6 | 28<br>3 | 0.9992<br>12186 | - | . | TF=HOXC4;class=Homeo domain<br>factors;sequence=ATC<br>ATTAG |
| ZEB1 NM_01323651 | TF<br>BS | TF<br>BS | 27<br>6 | 28<br>3 | 0.9992<br>12186 | - | . | TF=HOXC4;class=Homeo domain<br>factors;sequence=ATC<br>ATTAG |
| ZEB1 NM_01323649 | TF<br>BS | TF<br>BS | 27<br>6 | 28<br>3 | 0.9992<br>12186 | - | . | TF=HOXC4;class=Homeo domain<br>factors;sequence=ATC<br>ATTAG |
| ZEB1 NM_01323642 | TF<br>BS | TF<br>BS | 67<br>4 | 68<br>1 | 0.9992<br>12186 | - | . | TF=HOXC4;class=Homeo domain<br>factors;sequence=ATC<br>ATTAG |
| ZEB1 NM_01174096 | TF<br>BS | TF<br>BS | 27<br>6 | 28<br>3 | 0.9992<br>12186 | - | . | TF=HOXC4;class=Homeo domain<br>factors;sequence=ATC<br>ATTAG |
| ZEB1 NM_30751    | TF<br>BS | TF<br>BS | 27<br>6 | 28<br>3 | 0.9992<br>12186 | - | . | TF=HOXC4;class=Homeo domain<br>factors;sequence=ATC<br>ATTAG |
| ZEB1 NM_01323638 | TF<br>BS | TF<br>BS | 39<br>8 | 40<br>4 | 0.9991<br>27731 | + | . | TF=MEIS1;class=Homeo domain<br>factors;sequence=ATG<br>ACAG  |
| ZEB1 NM_01323643 | TF<br>BS | TF<br>BS | 39<br>8 | 40<br>4 | 0.9991<br>27731 | + | . | TF=MEIS1;class=Homeo domain<br>factors;sequence=ATG<br>ACAG  |
| ZEB1 NM_01323647 | TF<br>BS | TF<br>BS | 26<br>6 | 27<br>3 | 0.9990<br>53421 | + | . | TF=HOXB4;class=Homeo domain<br>factors;sequence=ATC<br>ATTAA |
| ZEB1 NM_01323641 | TF<br>BS | TF<br>BS | 66<br>4 | 67<br>1 | 0.9990<br>53421 | + | . | TF=HOXB4;class=Homeo domain<br>factors;sequence=ATC          |

|                  |          |          |          |          |                 |   |   |                                                                       |
|------------------|----------|----------|----------|----------|-----------------|---|---|-----------------------------------------------------------------------|
| ZEB1 NM_01323638 | TF<br>BS | TF<br>BS | 10<br>65 | 10<br>72 | 0.9990<br>53421 | + | . | ATTAA<br>TF=HOXB4;class=Homeo domain<br>factors;sequence=ATC<br>ATTAA |
| ZEB1 NM_01323644 | TF<br>BS | TF<br>BS | 66<br>4  | 67<br>1  | 0.9990<br>53421 | + | . | TF=HOXB4;class=Homeo domain<br>factors;sequence=ATC<br>ATTAA          |
| ZEB1 NM_01323643 | TF<br>BS | TF<br>BS | 10<br>65 | 10<br>72 | 0.9990<br>53421 | + | . | TF=HOXB4;class=Homeo domain<br>factors;sequence=ATC<br>ATTAA          |
| ZEB1 NM_01323674 | TF<br>BS | TF<br>BS | 26<br>6  | 27<br>3  | 0.9990<br>53421 | + | . | TF=HOXB4;class=Homeo domain<br>factors;sequence=ATC<br>ATTAA          |
| ZEB1 NM_01323673 | TF<br>BS | TF<br>BS | 16<br>40 | 16<br>47 | 0.9990<br>53421 | + | . | TF=HOXB4;class=Homeo domain<br>factors;sequence=ATC<br>ATTAA          |
| ZEB1 NM_01323650 | TF<br>BS | TF<br>BS | 26<br>6  | 27<br>3  | 0.9990<br>53421 | + | . | TF=HOXB4;class=Homeo domain<br>factors;sequence=ATC<br>ATTAA          |
| ZEB1 NM_01323648 | TF<br>BS | TF<br>BS | 26<br>6  | 27<br>3  | 0.9990<br>53421 | + | . | TF=HOXB4;class=Homeo domain<br>factors;sequence=ATC<br>ATTAA          |
| ZEB1 NM_01174095 | TF<br>BS | TF<br>BS | 26<br>6  | 27<br>3  | 0.9990<br>53421 | + | . | TF=HOXB4;class=Homeo domain<br>factors;sequence=ATC<br>ATTAA          |
| ZEB1 NM_01323646 | TF<br>BS | TF<br>BS | 66<br>4  | 67<br>1  | 0.9990<br>53421 | + | . | TF=HOXB4;class=Homeo domain<br>factors;sequence=ATC<br>ATTAA          |
| ZEB1 NM_01323645 | TF<br>BS | TF<br>BS | 66<br>4  | 67<br>1  | 0.9990<br>53421 | + | . | TF=HOXB4;class=Homeo domain<br>factors;sequence=ATC<br>ATTAA          |
| ZEB1 NM_01174093 | TF<br>BS | TF<br>BS | 26<br>6  | 27<br>3  | 0.9990<br>53421 | + | . | TF=HOXB4;class=Homeo domain<br>factors;sequence=ATC                   |

|                  |          |          |          |          |                 |   |   |                                                                       |
|------------------|----------|----------|----------|----------|-----------------|---|---|-----------------------------------------------------------------------|
| ZEB1 NM_01323655 | TF<br>BS | TF<br>BS | 26<br>6  | 27<br>3  | 0.9990<br>53421 | + | . | ATTAA<br>TF=HOXB4;class=Homeo domain<br>factors;sequence=ATC<br>ATTAA |
| ZEB1 NM_01323654 | TF<br>BS | TF<br>BS | 26<br>6  | 27<br>3  | 0.9990<br>53421 | + | . | TF=HOXB4;class=Homeo domain<br>factors;sequence=ATC<br>ATTAA          |
| ZEB1 NM_01323653 | TF<br>BS | TF<br>BS | 26<br>6  | 27<br>3  | 0.9990<br>53421 | + | . | TF=HOXB4;class=Homeo domain<br>factors;sequence=ATC<br>ATTAA          |
| ZEB1 NM_01323652 | TF<br>BS | TF<br>BS | 26<br>6  | 27<br>3  | 0.9990<br>53421 | + | . | TF=HOXB4;class=Homeo domain<br>factors;sequence=ATC<br>ATTAA          |
| ZEB1 NM_01323651 | TF<br>BS | TF<br>BS | 26<br>6  | 27<br>3  | 0.9990<br>53421 | + | . | TF=HOXB4;class=Homeo domain<br>factors;sequence=ATC<br>ATTAA          |
| ZEB1 NM_01323677 | TF<br>BS | TF<br>BS | 16<br>40 | 16<br>47 | 0.9990<br>53421 | + | . | TF=HOXB4;class=Homeo domain<br>factors;sequence=ATC<br>ATTAA          |
| ZEB1 NM_01323676 | TF<br>BS | TF<br>BS | 16<br>40 | 16<br>47 | 0.9990<br>53421 | + | . | TF=HOXB4;class=Homeo domain<br>factors;sequence=ATC<br>ATTAA          |
| ZEB1 NM_01323649 | TF<br>BS | TF<br>BS | 26<br>6  | 27<br>3  | 0.9990<br>53421 | + | . | TF=HOXB4;class=Homeo domain<br>factors;sequence=ATC<br>ATTAA          |
| ZEB1 NM_01323675 | TF<br>BS | TF<br>BS | 16<br>40 | 16<br>47 | 0.9990<br>53421 | + | . | TF=HOXB4;class=Homeo domain<br>factors;sequence=ATC<br>ATTAA          |
| ZEB1 NM_01323672 | TF<br>BS | TF<br>BS | 16<br>40 | 16<br>47 | 0.9990<br>53421 | + | . | TF=HOXB4;class=Homeo domain<br>factors;sequence=ATC<br>ATTAA          |
| ZEB1 NM_01323671 | TF<br>BS | TF<br>BS | 16<br>40 | 16<br>47 | 0.9990<br>53421 | + | . | TF=HOXB4;class=Homeo domain<br>factors;sequence=ATC                   |



|                  |          |          |         |         |                 |   |   |                                                              |
|------------------|----------|----------|---------|---------|-----------------|---|---|--------------------------------------------------------------|
| ZEB1 NM_01323642 | TF<br>BS | TF<br>BS | 66<br>4 | 67<br>1 | 0.9990<br>53421 | + | . | ATTAA<br>TF=HOXB4;class=Homeo domain<br>factors;sequence=ATC |
| ZEB1 NM_01174096 | TF<br>BS | TF<br>BS | 26<br>6 | 27<br>3 | 0.9990<br>53421 | + | . | ATTAA<br>TF=HOXB4;class=Homeo domain<br>factors;sequence=ATC |
| ZEB1 NM_030751   | TF<br>BS | TF<br>BS | 26<br>6 | 27<br>3 | 0.9990<br>53421 | + | . | ATTAA<br>TF=HOXB4;class=Homeo domain<br>factors;sequence=ATC |
| ZEB1 NM_01323638 | TF<br>BS | TF<br>BS | 39<br>5 | 40<br>2 | 0.9988<br>88511 | - | . | ATTAA<br>TF=HOXD4;class=Homeo domain<br>factors;sequence=GTC |
| ZEB1 NM_01323643 | TF<br>BS | TF<br>BS | 39<br>5 | 40<br>2 | 0.9988<br>88511 | - | . | ATTAA<br>TF=HOXD4;class=Homeo domain<br>factors;sequence=GTC |
| ZEB1 NM_01128128 | TF<br>BS | TF<br>BS | 84<br>4 | 85<br>1 | 0.9984<br>78909 | - | . | ATTAA<br>TF=PITX2;class=Homeo domain<br>factors;sequence=CTA |
| ZEB1 NM_01323673 | TF<br>BS | TF<br>BS | 38<br>5 | 39<br>2 | 0.9984<br>78909 | - | . | ATCCC<br>TF=PITX2;class=Homeo domain<br>factors;sequence=CTA |
| ZEB1 NM_01323678 | TF<br>BS | TF<br>BS | 84<br>4 | 85<br>1 | 0.9984<br>78909 | - | . | ATCCC<br>TF=PITX2;class=Homeo domain<br>factors;sequence=CTA |
| ZEB1 NM_01323677 | TF<br>BS | TF<br>BS | 38<br>5 | 39<br>2 | 0.9984<br>78909 | - | . | ATCCC<br>TF=PITX2;class=Homeo domain<br>factors;sequence=CTA |
| ZEB1 NM_01323676 | TF<br>BS | TF<br>BS | 38<br>5 | 39<br>2 | 0.9984<br>78909 | - | . | ATCCC<br>TF=PITX2;class=Homeo domain<br>factors;sequence=CTA |
| ZEB1 NM_01323675 | TF<br>BS | TF<br>BS | 38<br>5 | 39<br>2 | 0.9984<br>78909 | - | . | ATCCC<br>TF=PITX2;class=Homeo domain<br>factors;sequence=CTA |

|                  |          |          |          |          |                 |   |   |  |                                                                  |
|------------------|----------|----------|----------|----------|-----------------|---|---|--|------------------------------------------------------------------|
|                  |          |          |          |          |                 |   |   |  | ATCCC                                                            |
| ZEB1 NM_01323672 | TF<br>BS | TF<br>BS | 38<br>5  | 39<br>2  | 0.9984<br>78909 | - | . |  | TF=PITX2;class=Home<br>o domain<br>factors;sequence=CTA<br>ATCCC |
| ZEB1 NM_01323671 | TF<br>BS | TF<br>BS | 38<br>5  | 39<br>2  | 0.9984<br>78909 | - | . |  | TF=PITX2;class=Home<br>o domain<br>factors;sequence=CTA<br>ATCCC |
| ZEB1 NM_01323666 | TF<br>BS | TF<br>BS | 84<br>4  | 85<br>1  | 0.9984<br>78909 | - | . |  | TF=PITX2;class=Home<br>o domain<br>factors;sequence=CTA<br>ATCCC |
| ZEB1 NM_01323665 | TF<br>BS | TF<br>BS | 84<br>4  | 85<br>1  | 0.9984<br>78909 | - | . |  | TF=PITX2;class=Home<br>o domain<br>factors;sequence=CTA<br>ATCCC |
| ZEB1 NM_01323664 | TF<br>BS | TF<br>BS | 84<br>4  | 85<br>1  | 0.9984<br>78909 | - | . |  | TF=PITX2;class=Home<br>o domain<br>factors;sequence=CTA<br>ATCCC |
| ZEB1 NM_01323663 | TF<br>BS | TF<br>BS | 84<br>4  | 85<br>1  | 0.9984<br>78909 | - | . |  | TF=PITX2;class=Home<br>o domain<br>factors;sequence=CTA<br>ATCCC |
| ZEB1 NM_01323662 | TF<br>BS | TF<br>BS | 84<br>4  | 85<br>1  | 0.9984<br>78909 | - | . |  | TF=PITX2;class=Home<br>o domain<br>factors;sequence=CTA<br>ATCCC |
| ZEB1 NM_01323661 | TF<br>BS | TF<br>BS | 14<br>91 | 14<br>98 | 0.9984<br>78909 | - | . |  | TF=PITX2;class=Home<br>o domain<br>factors;sequence=CTA<br>ATCCC |
| ZEB1 NM_01323660 | TF<br>BS | TF<br>BS | 14<br>91 | 14<br>98 | 0.9984<br>78909 | - | . |  | TF=PITX2;class=Home<br>o domain<br>factors;sequence=CTA<br>ATCCC |
| ZEB1 NM_01323659 | TF<br>BS | TF<br>BS | 14<br>91 | 14<br>98 | 0.9984<br>78909 | - | . |  | TF=PITX2;class=Home<br>o domain<br>factors;sequence=CTA<br>ATCCC |
| ZEB1 NM_01174094 | TF<br>BS | TF<br>BS | 84<br>4  | 85<br>1  | 0.9984<br>78909 | - | . |  | TF=PITX2;class=Home<br>o domain<br>factors;sequence=CTA          |

|                  |          |          |          |          |                 |   |   |                                                                       |
|------------------|----------|----------|----------|----------|-----------------|---|---|-----------------------------------------------------------------------|
|                  |          |          |          |          |                 |   |   | ATCCC                                                                 |
| ZEB1 NM_01323638 | TF<br>BS | TF<br>BS | 83       | 93       | 0.9984<br>57723 | - | . | TF=GATA2;class=Other C4 zinc finger-type factors;sequence=TTCTTATCTCT |
| ZEB1 NM_01323643 | TF<br>BS | TF<br>BS | 83       | 93       | 0.9984<br>57723 | - | . | TF=GATA2;class=Other C4 zinc finger-type factors;sequence=TTCTTATCTCT |
| ZEB1 NM_01323638 | TF<br>BS | TF<br>BS | 39<br>5  | 40<br>2  | 0.9981<br>06843 | - | . | TF=HOXB4;class=Homeo domain factors;sequence=GTCATTAA                 |
| ZEB1 NM_01323643 | TF<br>BS | TF<br>BS | 39<br>5  | 40<br>2  | 0.9981<br>06843 | - | . | TF=HOXB4;class=Homeo domain factors;sequence=GTCATTAA                 |
| ZEB1 NM_01323647 | TF<br>BS | TF<br>BS | 19<br>07 | 19<br>16 | 0.9973<br>17418 | + | . | TF=HOXA9;class=Homeo domain factors;sequence=GTCGTAAACC               |
| ZEB1 NM_01323674 | TF<br>BS | TF<br>BS | 19<br>07 | 19<br>16 | 0.9973<br>17418 | + | . | TF=HOXA9;class=Homeo domain factors;sequence=GTCGTAAACC               |
| ZEB1 NM_01323658 | TF<br>BS | TF<br>BS | 13<br>55 | 13<br>64 | 0.9973<br>17418 | + | . | TF=HOXA9;class=Homeo domain factors;sequence=GTCGTAAACC               |
| ZEB1 NM_01323657 | TF<br>BS | TF<br>BS | 13<br>55 | 13<br>64 | 0.9973<br>17418 | + | . | TF=HOXA9;class=Homeo domain factors;sequence=GTCGTAAACC               |
| ZEB1 NM_01323650 | TF<br>BS | TF<br>BS | 19<br>07 | 19<br>16 | 0.9973<br>17418 | + | . | TF=HOXA9;class=Homeo domain factors;sequence=GTCGTAAACC               |
| ZEB1 NM_01323648 | TF<br>BS | TF<br>BS | 19<br>07 | 19<br>16 | 0.9973<br>17418 | + | . | TF=HOXA9;class=Homeo domain factors;sequence=GTCGTAAACC               |
| ZEB1 NM_01174095 | TF<br>BS | TF<br>BS | 19<br>07 | 19<br>16 | 0.9973<br>17418 | + | . | TF=HOXA9;class=Homeo domain factors;sequence=GTC                      |

|                   |          |          |          |          |                 |   |   |  |                                                                |
|-------------------|----------|----------|----------|----------|-----------------|---|---|--|----------------------------------------------------------------|
|                   |          |          |          |          |                 |   |   |  | GTAAACC                                                        |
| ZEB1 NM_001174093 | TF<br>BS | TF<br>BS | 19<br>07 | 19<br>16 | 0.9973<br>17418 | + | . |  | TF=HOXA9;class=Homeo domain<br>factors;sequence=GTC<br>GTAAACC |
| ZEB1 NM_001323656 | TF<br>BS | TF<br>BS | 13<br>55 | 13<br>64 | 0.9973<br>17418 | + | . |  | TF=HOXA9;class=Homeo domain<br>factors;sequence=GTC<br>GTAAACC |
| ZEB1 NM_001323655 | TF<br>BS | TF<br>BS | 19<br>07 | 19<br>16 | 0.9973<br>17418 | + | . |  | TF=HOXA9;class=Homeo domain<br>factors;sequence=GTC<br>GTAAACC |
| ZEB1 NM_001323654 | TF<br>BS | TF<br>BS | 19<br>07 | 19<br>16 | 0.9973<br>17418 | + | . |  | TF=HOXA9;class=Homeo domain<br>factors;sequence=GTC<br>GTAAACC |
| ZEB1 NM_001323653 | TF<br>BS | TF<br>BS | 19<br>07 | 19<br>16 | 0.9973<br>17418 | + | . |  | TF=HOXA9;class=Homeo domain<br>factors;sequence=GTC<br>GTAAACC |
| ZEB1 NM_001323652 | TF<br>BS | TF<br>BS | 19<br>07 | 19<br>16 | 0.9973<br>17418 | + | . |  | TF=HOXA9;class=Homeo domain<br>factors;sequence=GTC<br>GTAAACC |
| ZEB1 NM_001323651 | TF<br>BS | TF<br>BS | 19<br>07 | 19<br>16 | 0.9973<br>17418 | + | . |  | TF=HOXA9;class=Homeo domain<br>factors;sequence=GTC<br>GTAAACC |
| ZEB1 NM_001323649 | TF<br>BS | TF<br>BS | 19<br>07 | 19<br>16 | 0.9973<br>17418 | + | . |  | TF=HOXA9;class=Homeo domain<br>factors;sequence=GTC<br>GTAAACC |
| ZEB1 NM_001174096 | TF<br>BS | TF<br>BS | 19<br>07 | 19<br>16 | 0.9973<br>17418 | + | . |  | TF=HOXA9;class=Homeo domain<br>factors;sequence=GTC<br>GTAAACC |
| ZEB1 NM_030751    | TF<br>BS | TF<br>BS | 19<br>07 | 19<br>16 | 0.9973<br>17418 | + | . |  | TF=HOXA9;class=Homeo domain<br>factors;sequence=GTC<br>GTAAACC |
| ZEB1 NM_001323661 | TF<br>BS | TF<br>BS | 56<br>9  | 57<br>8  | 0.9973<br>17418 | + | . |  | TF=HOXA9;class=Homeo domain<br>factors;sequence=GTC            |

|                  |          |          |          |          |                 |   |   |                                                                           |
|------------------|----------|----------|----------|----------|-----------------|---|---|---------------------------------------------------------------------------|
| ZEB1 NM_01323660 | TF<br>BS | TF<br>BS | 56<br>9  | 57<br>8  | 0.9973<br>17418 | + | . | GTAAACC<br>TF=HOXA9;class=Homeo domain<br>factors;sequence=GTC<br>GTAAACC |
| ZEB1 NM_01323659 | TF<br>BS | TF<br>BS | 56<br>9  | 57<br>8  | 0.9973<br>17418 | + | . | TF=HOXA9;class=Homeo domain<br>factors;sequence=GTC<br>GTAAACC            |
| ZEB1 NM_01128128 | TF<br>BS | TF<br>BS | 12<br>90 | 13<br>00 | 0.9969<br>87594 | - | . | TF=MAZ;class=C2H2 zinc finger<br>factors;sequence=GCC<br>CCCTCCCC         |
| ZEB1 NM_01323673 | TF<br>BS | TF<br>BS | 83<br>1  | 84<br>1  | 0.9969<br>87594 | - | . | TF=MAZ;class=C2H2 zinc finger<br>factors;sequence=GCC<br>CCCTCCCC         |
| ZEB1 NM_01323678 | TF<br>BS | TF<br>BS | 12<br>90 | 13<br>00 | 0.9969<br>87594 | - | . | TF=MAZ;class=C2H2 zinc finger<br>factors;sequence=GCC<br>CCCTCCCC         |
| ZEB1 NM_01323677 | TF<br>BS | TF<br>BS | 83<br>1  | 84<br>1  | 0.9969<br>87594 | - | . | TF=MAZ;class=C2H2 zinc finger<br>factors;sequence=GCC<br>CCCTCCCC         |
| ZEB1 NM_01323676 | TF<br>BS | TF<br>BS | 83<br>1  | 84<br>1  | 0.9969<br>87594 | - | . | TF=MAZ;class=C2H2 zinc finger<br>factors;sequence=GCC<br>CCCTCCCC         |
| ZEB1 NM_01323675 | TF<br>BS | TF<br>BS | 83<br>1  | 84<br>1  | 0.9969<br>87594 | - | . | TF=MAZ;class=C2H2 zinc finger<br>factors;sequence=GCC<br>CCCTCCCC         |
| ZEB1 NM_01323672 | TF<br>BS | TF<br>BS | 83<br>1  | 84<br>1  | 0.9969<br>87594 | - | . | TF=MAZ;class=C2H2 zinc finger<br>factors;sequence=GCC<br>CCCTCCCC         |
| ZEB1 NM_01323671 | TF<br>BS | TF<br>BS | 83<br>1  | 84<br>1  | 0.9969<br>87594 | - | . | TF=MAZ;class=C2H2 zinc finger<br>factors;sequence=GCC<br>CCCTCCCC         |
| ZEB1 NM_01323666 | TF<br>BS | TF<br>BS | 12<br>90 | 13<br>00 | 0.9969<br>87594 | - | . | TF=MAZ;class=C2H2 zinc finger<br>factors;sequence=GCC                     |

|                  |          |          |          |          |                 |   |   |                                                                                              |
|------------------|----------|----------|----------|----------|-----------------|---|---|----------------------------------------------------------------------------------------------|
|                  |          |          |          |          |                 |   |   | CCCTCCCC                                                                                     |
| ZEB1 NM_01323665 | TF<br>BS | TF<br>BS | 12<br>90 | 13<br>00 | 0.9969<br>87594 | - | . | TF=MAZ;class=C2H2<br>zinc finger<br>factors;sequence=GCC<br>CCCTCCCC                         |
| ZEB1 NM_01323664 | TF<br>BS | TF<br>BS | 12<br>90 | 13<br>00 | 0.9969<br>87594 | - | . | TF=MAZ;class=C2H2<br>zinc finger<br>factors;sequence=GCC<br>CCCTCCCC                         |
| ZEB1 NM_01323663 | TF<br>BS | TF<br>BS | 12<br>90 | 13<br>00 | 0.9969<br>87594 | - | . | TF=MAZ;class=C2H2<br>zinc finger<br>factors;sequence=GCC<br>CCCTCCCC                         |
| ZEB1 NM_01323662 | TF<br>BS | TF<br>BS | 12<br>90 | 13<br>00 | 0.9969<br>87594 | - | . | TF=MAZ;class=C2H2<br>zinc finger<br>factors;sequence=GCC<br>CCCTCCCC                         |
| ZEB1 NM_01323661 | TF<br>BS | TF<br>BS | 19<br>37 | 19<br>47 | 0.9969<br>87594 | - | . | TF=MAZ;class=C2H2<br>zinc finger<br>factors;sequence=GCC<br>CCCTCCCC                         |
| ZEB1 NM_01323660 | TF<br>BS | TF<br>BS | 19<br>37 | 19<br>47 | 0.9969<br>87594 | - | . | TF=MAZ;class=C2H2<br>zinc finger<br>factors;sequence=GCC<br>CCCTCCCC                         |
| ZEB1 NM_01323659 | TF<br>BS | TF<br>BS | 19<br>37 | 19<br>47 | 0.9969<br>87594 | - | . | TF=MAZ;class=C2H2<br>zinc finger<br>factors;sequence=GCC<br>CCCTCCCC                         |
| ZEB1 NM_01174094 | TF<br>BS | TF<br>BS | 12<br>90 | 13<br>00 | 0.9969<br>87594 | - | . | TF=MAZ;class=C2H2<br>zinc finger<br>factors;sequence=GCC<br>CCCTCCCC                         |
| ZEB1 NM_01323647 | TF<br>BS | TF<br>BS | 86       | 93       | 0.9969<br>78314 | + | . | TF=NR2C2(var.2);class<br>=Nuclear receptors with<br>C4 zinc<br>fingers;sequence=GGG<br>GTCAA |
| ZEB1 NM_01323641 | TF<br>BS | TF<br>BS | 48<br>4  | 49<br>1  | 0.9969<br>78314 | + | . | TF=NR2C2(var.2);class<br>=Nuclear receptors with<br>C4 zinc<br>fingers;sequence=GGG<br>GTCAA |
| ZEB1 NM_0        | TF       | TF       | 88       | 89       | 0.9969          | + | . | TF=NR2C2(var.2);class                                                                        |

|                  |          |          |         |         |                 |   |   |                                                                                  |
|------------------|----------|----------|---------|---------|-----------------|---|---|----------------------------------------------------------------------------------|
| 01323638         | BS       | BS       | 5       | 2       | 78314           |   |   | =Nuclear receptors with C4 zinc fingers;sequence=GGG GTCAA                       |
| ZEB1 NM_01323644 | TF<br>BS | TF<br>BS | 48<br>4 | 49<br>1 | 0.9969<br>78314 | + | . | TF=NR2C2(var.2);class =Nuclear receptors with C4 zinc fingers;sequence=GGG GTCAA |
| ZEB1 NM_01323643 | TF<br>BS | TF<br>BS | 88<br>5 | 89<br>2 | 0.9969<br>78314 | + | . | TF=NR2C2(var.2);class =Nuclear receptors with C4 zinc fingers;sequence=GGG GTCAA |
| ZEB1 NM_01323674 | TF<br>BS | TF<br>BS | 86      | 93      | 0.9969<br>78314 | + | . | TF=NR2C2(var.2);class =Nuclear receptors with C4 zinc fingers;sequence=GGG GTCAA |
| ZEB1 NM_01323650 | TF<br>BS | TF<br>BS | 86      | 93      | 0.9969<br>78314 | + | . | TF=NR2C2(var.2);class =Nuclear receptors with C4 zinc fingers;sequence=GGG GTCAA |
| ZEB1 NM_01323648 | TF<br>BS | TF<br>BS | 86      | 93      | 0.9969<br>78314 | + | . | TF=NR2C2(var.2);class =Nuclear receptors with C4 zinc fingers;sequence=GGG GTCAA |
| ZEB1 NM_01174095 | TF<br>BS | TF<br>BS | 86      | 93      | 0.9969<br>78314 | + | . | TF=NR2C2(var.2);class =Nuclear receptors with C4 zinc fingers;sequence=GGG GTCAA |
| ZEB1 NM_01323646 | TF<br>BS | TF<br>BS | 48<br>4 | 49<br>1 | 0.9969<br>78314 | + | . | TF=NR2C2(var.2);class =Nuclear receptors with C4 zinc fingers;sequence=GGG GTCAA |
| ZEB1 NM_01323645 | TF<br>BS | TF<br>BS | 48<br>4 | 49<br>1 | 0.9969<br>78314 | + | . | TF=NR2C2(var.2);class =Nuclear receptors with C4 zinc fingers;sequence=GGG GTCAA |

|                   |          |          |         |         |                 |   |   |                                                                                              |
|-------------------|----------|----------|---------|---------|-----------------|---|---|----------------------------------------------------------------------------------------------|
| ZEB1 NM_001174093 | TF<br>BS | TF<br>BS | 86      | 93      | 0.9969<br>78314 | + | . | TF=NR2C2(var.2);class<br>=Nuclear receptors with<br>C4 zinc<br>fingers;sequence=GGG<br>GTCAA |
| ZEB1 NM_001323655 | TF<br>BS | TF<br>BS | 86      | 93      | 0.9969<br>78314 | + | . | TF=NR2C2(var.2);class<br>=Nuclear receptors with<br>C4 zinc<br>fingers;sequence=GGG<br>GTCAA |
| ZEB1 NM_001323654 | TF<br>BS | TF<br>BS | 86      | 93      | 0.9969<br>78314 | + | . | TF=NR2C2(var.2);class<br>=Nuclear receptors with<br>C4 zinc<br>fingers;sequence=GGG<br>GTCAA |
| ZEB1 NM_001323653 | TF<br>BS | TF<br>BS | 86      | 93      | 0.9969<br>78314 | + | . | TF=NR2C2(var.2);class<br>=Nuclear receptors with<br>C4 zinc<br>fingers;sequence=GGG<br>GTCAA |
| ZEB1 NM_001323652 | TF<br>BS | TF<br>BS | 86      | 93      | 0.9969<br>78314 | + | . | TF=NR2C2(var.2);class<br>=Nuclear receptors with<br>C4 zinc<br>fingers;sequence=GGG<br>GTCAA |
| ZEB1 NM_001323651 | TF<br>BS | TF<br>BS | 86      | 93      | 0.9969<br>78314 | + | . | TF=NR2C2(var.2);class<br>=Nuclear receptors with<br>C4 zinc<br>fingers;sequence=GGG<br>GTCAA |
| ZEB1 NM_001323649 | TF<br>BS | TF<br>BS | 86      | 93      | 0.9969<br>78314 | + | . | TF=NR2C2(var.2);class<br>=Nuclear receptors with<br>C4 zinc<br>fingers;sequence=GGG<br>GTCAA |
| ZEB1 NM_001323642 | TF<br>BS | TF<br>BS | 48<br>4 | 49<br>1 | 0.9969<br>78314 | + | . | TF=NR2C2(var.2);class<br>=Nuclear receptors with<br>C4 zinc<br>fingers;sequence=GGG<br>GTCAA |
| ZEB1 NM_001174096 | TF<br>BS | TF<br>BS | 86      | 93      | 0.9969<br>78314 | + | . | TF=NR2C2(var.2);class<br>=Nuclear receptors with<br>C4 zinc<br>fingers;sequence=GGG          |



|                  |          |          |         |         |                 |   |   |                                                                                                       |
|------------------|----------|----------|---------|---------|-----------------|---|---|-------------------------------------------------------------------------------------------------------|
| ZEB1 NM_030751   | TF<br>BS | TF<br>BS | 86      | 93      | 0.9969<br>78314 | + | . | GTCAA<br>TF=NR2C2(var.2);class<br>=Nuclear receptors with<br>C4 zinc<br>fingers;sequence=GGG<br>GTCAA |
| ZEB1 NM_01128128 | TF<br>BS | TF<br>BS | 84<br>4 | 85<br>1 | 0.9969<br>68423 | - | . | TF=RHOXF1;class=Ho<br>meo domain<br>factors;sequence=CTA<br>ATCCC                                     |
| ZEB1 NM_01323673 | TF<br>BS | TF<br>BS | 38<br>5 | 39<br>2 | 0.9969<br>68423 | - | . | TF=RHOXF1;class=Ho<br>meo domain<br>factors;sequence=CTA<br>ATCCC                                     |
| ZEB1 NM_01323678 | TF<br>BS | TF<br>BS | 84<br>4 | 85<br>1 | 0.9969<br>68423 | - | . | TF=RHOXF1;class=Ho<br>meo domain<br>factors;sequence=CTA<br>ATCCC                                     |
| ZEB1 NM_01323677 | TF<br>BS | TF<br>BS | 38<br>5 | 39<br>2 | 0.9969<br>68423 | - | . | TF=RHOXF1;class=Ho<br>meo domain<br>factors;sequence=CTA<br>ATCCC                                     |
| ZEB1 NM_01323676 | TF<br>BS | TF<br>BS | 38<br>5 | 39<br>2 | 0.9969<br>68423 | - | . | TF=RHOXF1;class=Ho<br>meo domain<br>factors;sequence=CTA<br>ATCCC                                     |
| ZEB1 NM_01323675 | TF<br>BS | TF<br>BS | 38<br>5 | 39<br>2 | 0.9969<br>68423 | - | . | TF=RHOXF1;class=Ho<br>meo domain<br>factors;sequence=CTA<br>ATCCC                                     |
| ZEB1 NM_01323672 | TF<br>BS | TF<br>BS | 38<br>5 | 39<br>2 | 0.9969<br>68423 | - | . | TF=RHOXF1;class=Ho<br>meo domain<br>factors;sequence=CTA<br>ATCCC                                     |
| ZEB1 NM_01323671 | TF<br>BS | TF<br>BS | 38<br>5 | 39<br>2 | 0.9969<br>68423 | - | . | TF=RHOXF1;class=Ho<br>meo domain<br>factors;sequence=CTA<br>ATCCC                                     |
| ZEB1 NM_01323666 | TF<br>BS | TF<br>BS | 84<br>4 | 85<br>1 | 0.9969<br>68423 | - | . | TF=RHOXF1;class=Ho<br>meo domain<br>factors;sequence=CTA<br>ATCCC                                     |
| ZEB1 NM_01323665 | TF<br>BS | TF<br>BS | 84<br>4 | 85<br>1 | 0.9969<br>68423 | - | . | TF=RHOXF1;class=Ho<br>meo domain                                                                      |

|                       |          |          |          |          |                 |   |   |                                                                                                 |
|-----------------------|----------|----------|----------|----------|-----------------|---|---|-------------------------------------------------------------------------------------------------|
|                       |          |          |          |          |                 |   |   | factors;sequence=CTA<br>ATCCC                                                                   |
| ZEB1 NM_0<br>01323664 | TF<br>BS | TF<br>BS | 84<br>4  | 85<br>1  | 0.9969<br>68423 | - | . | TF=RHOXF1;class=Ho<br>meo domain<br>factors;sequence=CTA<br>ATCCC                               |
| ZEB1 NM_0<br>01323663 | TF<br>BS | TF<br>BS | 84<br>4  | 85<br>1  | 0.9969<br>68423 | - | . | TF=RHOXF1;class=Ho<br>meo domain<br>factors;sequence=CTA<br>ATCCC                               |
| ZEB1 NM_0<br>01323662 | TF<br>BS | TF<br>BS | 84<br>4  | 85<br>1  | 0.9969<br>68423 | - | . | TF=RHOXF1;class=Ho<br>meo domain<br>factors;sequence=CTA<br>ATCCC                               |
| ZEB1 NM_0<br>01323661 | TF<br>BS | TF<br>BS | 14<br>91 | 14<br>98 | 0.9969<br>68423 | - | . | TF=RHOXF1;class=Ho<br>meo domain<br>factors;sequence=CTA<br>ATCCC                               |
| ZEB1 NM_0<br>01323660 | TF<br>BS | TF<br>BS | 14<br>91 | 14<br>98 | 0.9969<br>68423 | - | . | TF=RHOXF1;class=Ho<br>meo domain<br>factors;sequence=CTA<br>ATCCC                               |
| ZEB1 NM_0<br>01323659 | TF<br>BS | TF<br>BS | 14<br>91 | 14<br>98 | 0.9969<br>68423 | - | . | TF=RHOXF1;class=Ho<br>meo domain<br>factors;sequence=CTA<br>ATCCC                               |
| ZEB1 NM_0<br>01174094 | TF<br>BS | TF<br>BS | 84<br>4  | 85<br>1  | 0.9969<br>68423 | - | . | TF=RHOXF1;class=Ho<br>meo domain<br>factors;sequence=CTA<br>ATCCC                               |
| ZEB1 NM_0<br>01128128 | TF<br>BS | TF<br>BS | 13<br>38 | 13<br>47 | 0.9964<br>48102 | - | . | TF=BHLHE22(var.2);cl<br>ass=Basic<br>helix-loop-helix factors<br>(bHLH);sequence=TGC<br>AGCTGCG |
| ZEB1 NM_0<br>01323673 | TF<br>BS | TF<br>BS | 87<br>9  | 88<br>8  | 0.9964<br>48102 | - | . | TF=BHLHE22(var.2);cl<br>ass=Basic<br>helix-loop-helix factors<br>(bHLH);sequence=TGC<br>AGCTGCG |
| ZEB1 NM_0<br>01323678 | TF<br>BS | TF<br>BS | 13<br>38 | 13<br>47 | 0.9964<br>48102 | - | . | TF=BHLHE22(var.2);cl<br>ass=Basic<br>helix-loop-helix factors<br>(bHLH);sequence=TGC            |

|                  |          |          |          |          |                 |   |   |  |                                                                                          |
|------------------|----------|----------|----------|----------|-----------------|---|---|--|------------------------------------------------------------------------------------------|
|                  |          |          |          |          |                 |   |   |  | AGCTGCG                                                                                  |
| ZEB1 NM_01323677 | TF<br>BS | TF<br>BS | 87<br>9  | 88<br>8  | 0.9964<br>48102 | - | . |  | TF=BHLHE22(var.2);class=Basic<br>helix-loop-helix factors (bHLH);sequence=TGC<br>AGCTGCG |
| ZEB1 NM_01323676 | TF<br>BS | TF<br>BS | 87<br>9  | 88<br>8  | 0.9964<br>48102 | - | . |  | TF=BHLHE22(var.2);class=Basic<br>helix-loop-helix factors (bHLH);sequence=TGC<br>AGCTGCG |
| ZEB1 NM_01323675 | TF<br>BS | TF<br>BS | 87<br>9  | 88<br>8  | 0.9964<br>48102 | - | . |  | TF=BHLHE22(var.2);class=Basic<br>helix-loop-helix factors (bHLH);sequence=TGC<br>AGCTGCG |
| ZEB1 NM_01323672 | TF<br>BS | TF<br>BS | 87<br>9  | 88<br>8  | 0.9964<br>48102 | - | . |  | TF=BHLHE22(var.2);class=Basic<br>helix-loop-helix factors (bHLH);sequence=TGC<br>AGCTGCG |
| ZEB1 NM_01323671 | TF<br>BS | TF<br>BS | 87<br>9  | 88<br>8  | 0.9964<br>48102 | - | . |  | TF=BHLHE22(var.2);class=Basic<br>helix-loop-helix factors (bHLH);sequence=TGC<br>AGCTGCG |
| ZEB1 NM_01323666 | TF<br>BS | TF<br>BS | 13<br>38 | 13<br>47 | 0.9964<br>48102 | - | . |  | TF=BHLHE22(var.2);class=Basic<br>helix-loop-helix factors (bHLH);sequence=TGC<br>AGCTGCG |
| ZEB1 NM_01323665 | TF<br>BS | TF<br>BS | 13<br>38 | 13<br>47 | 0.9964<br>48102 | - | . |  | TF=BHLHE22(var.2);class=Basic<br>helix-loop-helix factors (bHLH);sequence=TGC<br>AGCTGCG |
| ZEB1 NM_01323664 | TF<br>BS | TF<br>BS | 13<br>38 | 13<br>47 | 0.9964<br>48102 | - | . |  | TF=BHLHE22(var.2);class=Basic<br>helix-loop-helix factors (bHLH);sequence=TGC<br>AGCTGCG |
| ZEB1 NM_01323663 | TF<br>BS | TF<br>BS | 13<br>38 | 13<br>47 | 0.9964<br>48102 | - | . |  | TF=BHLHE22(var.2);class=Basic<br>helix-loop-helix factors                                |

|                  |          |          |          |          |                 |   |   |                                                                                                                                   |
|------------------|----------|----------|----------|----------|-----------------|---|---|-----------------------------------------------------------------------------------------------------------------------------------|
| ZEB1 NM_01323662 | TF<br>BS | TF<br>BS | 13<br>38 | 13<br>47 | 0.9964<br>48102 | - | . | (bHLH);sequence=TGC<br>AGCTGCG<br>TF=BHLHE22(var.2);cl<br>ass=Basic<br>helix-loop-helix factors<br>(bHLH);sequence=TGC<br>AGCTGCG |
| ZEB1 NM_01323661 | TF<br>BS | TF<br>BS | 19<br>85 | 19<br>94 | 0.9964<br>48102 | - | . | TF=BHLHE22(var.2);cl<br>ass=Basic<br>helix-loop-helix factors<br>(bHLH);sequence=TGC<br>AGCTGCG                                   |
| ZEB1 NM_01323660 | TF<br>BS | TF<br>BS | 19<br>85 | 19<br>94 | 0.9964<br>48102 | - | . | TF=BHLHE22(var.2);cl<br>ass=Basic<br>helix-loop-helix factors<br>(bHLH);sequence=TGC<br>AGCTGCG                                   |
| ZEB1 NM_01323659 | TF<br>BS | TF<br>BS | 19<br>85 | 19<br>94 | 0.9964<br>48102 | - | . | TF=BHLHE22(var.2);cl<br>ass=Basic<br>helix-loop-helix factors<br>(bHLH);sequence=TGC<br>AGCTGCG                                   |
| ZEB1 NM_01174094 | TF<br>BS | TF<br>BS | 13<br>38 | 13<br>47 | 0.9964<br>48102 | - | . | TF=BHLHE22(var.2);cl<br>ass=Basic<br>helix-loop-helix factors<br>(bHLH);sequence=TGC<br>AGCTGCG                                   |
| ZEB1 NM_01128128 | TF<br>BS | TF<br>BS | 13<br>38 | 13<br>47 | 0.9964<br>24556 | + | . | TF=BHLHE22(var.2);cl<br>ass=Basic<br>helix-loop-helix factors<br>(bHLH);sequence=CGC<br>AGCTGCA                                   |
| ZEB1 NM_01323673 | TF<br>BS | TF<br>BS | 87<br>9  | 88<br>8  | 0.9964<br>24556 | + | . | TF=BHLHE22(var.2);cl<br>ass=Basic<br>helix-loop-helix factors<br>(bHLH);sequence=CGC<br>AGCTGCA                                   |
| ZEB1 NM_01323678 | TF<br>BS | TF<br>BS | 13<br>38 | 13<br>47 | 0.9964<br>24556 | + | . | TF=BHLHE22(var.2);cl<br>ass=Basic<br>helix-loop-helix factors<br>(bHLH);sequence=CGC<br>AGCTGCA                                   |
| ZEB1 NM_01323677 | TF<br>BS | TF<br>BS | 87<br>9  | 88<br>8  | 0.9964<br>24556 | + | . | TF=BHLHE22(var.2);cl<br>ass=Basic                                                                                                 |

|                       |          |          |          |          |                 |   |   |                                                            |
|-----------------------|----------|----------|----------|----------|-----------------|---|---|------------------------------------------------------------|
|                       |          |          |          |          |                 |   |   | helix-loop-helix factors<br>(bHLH);sequence=CGC<br>AGCTGCA |
| ZEB1 NM_0<br>01323676 | TF<br>BS | TF<br>BS | 87<br>9  | 88<br>8  | 0.9964<br>24556 | + | . | TF=BHLHE22(var.2);cl<br>ass=Basic                          |
|                       |          |          |          |          |                 |   |   | helix-loop-helix factors<br>(bHLH);sequence=CGC<br>AGCTGCA |
| ZEB1 NM_0<br>01323675 | TF<br>BS | TF<br>BS | 87<br>9  | 88<br>8  | 0.9964<br>24556 | + | . | TF=BHLHE22(var.2);cl<br>ass=Basic                          |
|                       |          |          |          |          |                 |   |   | helix-loop-helix factors<br>(bHLH);sequence=CGC<br>AGCTGCA |
| ZEB1 NM_0<br>01323672 | TF<br>BS | TF<br>BS | 87<br>9  | 88<br>8  | 0.9964<br>24556 | + | . | TF=BHLHE22(var.2);cl<br>ass=Basic                          |
|                       |          |          |          |          |                 |   |   | helix-loop-helix factors<br>(bHLH);sequence=CGC<br>AGCTGCA |
| ZEB1 NM_0<br>01323671 | TF<br>BS | TF<br>BS | 87<br>9  | 88<br>8  | 0.9964<br>24556 | + | . | TF=BHLHE22(var.2);cl<br>ass=Basic                          |
|                       |          |          |          |          |                 |   |   | helix-loop-helix factors<br>(bHLH);sequence=CGC<br>AGCTGCA |
| ZEB1 NM_0<br>01323666 | TF<br>BS | TF<br>BS | 13<br>38 | 13<br>47 | 0.9964<br>24556 | + | . | TF=BHLHE22(var.2);cl<br>ass=Basic                          |
|                       |          |          |          |          |                 |   |   | helix-loop-helix factors<br>(bHLH);sequence=CGC<br>AGCTGCA |
| ZEB1 NM_0<br>01323665 | TF<br>BS | TF<br>BS | 13<br>38 | 13<br>47 | 0.9964<br>24556 | + | . | TF=BHLHE22(var.2);cl<br>ass=Basic                          |
|                       |          |          |          |          |                 |   |   | helix-loop-helix factors<br>(bHLH);sequence=CGC<br>AGCTGCA |
| ZEB1 NM_0<br>01323664 | TF<br>BS | TF<br>BS | 13<br>38 | 13<br>47 | 0.9964<br>24556 | + | . | TF=BHLHE22(var.2);cl<br>ass=Basic                          |
|                       |          |          |          |          |                 |   |   | helix-loop-helix factors<br>(bHLH);sequence=CGC<br>AGCTGCA |
| ZEB1 NM_0<br>01323663 | TF<br>BS | TF<br>BS | 13<br>38 | 13<br>47 | 0.9964<br>24556 | + | . | TF=BHLHE22(var.2);cl<br>ass=Basic                          |
|                       |          |          |          |          |                 |   |   | helix-loop-helix factors<br>(bHLH);sequence=CGC<br>AGCTGCA |
| ZEB1 NM_0             | TF       | TF       | 13       | 13       | 0.9964          | + | . | TF=BHLHE22(var.2);cl                                       |

|                       |          |          |          |          |                 |   |   |                                                                                                 |
|-----------------------|----------|----------|----------|----------|-----------------|---|---|-------------------------------------------------------------------------------------------------|
| 01323662              | BS       | BS       | 38       | 47       | 24556           |   |   | ass=Basic<br>helix-loop-helix factors<br>(bHLH);sequence=CGC<br>AGCTGCA                         |
| ZEB1 NM_0<br>01323661 | TF<br>BS | TF<br>BS | 19<br>85 | 19<br>94 | 0.9964<br>24556 | + | . | TF=BHLHE22(var.2);cl<br>ass=Basic<br>helix-loop-helix factors<br>(bHLH);sequence=CGC<br>AGCTGCA |
| ZEB1 NM_0<br>01323660 | TF<br>BS | TF<br>BS | 19<br>85 | 19<br>94 | 0.9964<br>24556 | + | . | TF=BHLHE22(var.2);cl<br>ass=Basic<br>helix-loop-helix factors<br>(bHLH);sequence=CGC<br>AGCTGCA |
| ZEB1 NM_0<br>01323659 | TF<br>BS | TF<br>BS | 19<br>85 | 19<br>94 | 0.9964<br>24556 | + | . | TF=BHLHE22(var.2);cl<br>ass=Basic<br>helix-loop-helix factors<br>(bHLH);sequence=CGC<br>AGCTGCA |
| ZEB1 NM_0<br>01174094 | TF<br>BS | TF<br>BS | 13<br>38 | 13<br>47 | 0.9964<br>24556 | + | . | TF=BHLHE22(var.2);cl<br>ass=Basic<br>helix-loop-helix factors<br>(bHLH);sequence=CGC<br>AGCTGCA |
| ZEB1 NM_0<br>01323647 | TF<br>BS | TF<br>BS | 22<br>41 | 22<br>47 | 0.9963<br>05873 | + | . | TF=FOXL1;class=Fork<br>head / winged helix<br>factors;sequence=ATA<br>AACA                      |
| ZEB1 NM_0<br>01128128 | TF<br>BS | TF<br>BS | 22<br>41 | 22<br>47 | 0.9963<br>05873 | + | . | TF=FOXL1;class=Fork<br>head / winged helix<br>factors;sequence=ATA<br>AACA                      |
| ZEB1 NM_0<br>01128128 | TF<br>BS | TF<br>BS | 13<br>49 | 13<br>55 | 0.9963<br>05873 | - | . | TF=FOXL1;class=Fork<br>head / winged helix<br>factors;sequence=ATA<br>AACA                      |
| ZEB1 NM_0<br>01323641 | TF<br>BS | TF<br>BS | 22<br>41 | 22<br>47 | 0.9963<br>05873 | + | . | TF=FOXL1;class=Fork<br>head / winged helix<br>factors;sequence=ATA<br>AACA                      |
| ZEB1 NM_0<br>01323641 | TF<br>BS | TF<br>BS | 12<br>2  | 12<br>8  | 0.9963<br>05873 | - | . | TF=FOXL1;class=Fork<br>head / winged helix<br>factors;sequence=ATA<br>AACA                      |

|                  |          |          |          |          |                 |   |   |                                                                   |
|------------------|----------|----------|----------|----------|-----------------|---|---|-------------------------------------------------------------------|
| ZEB1 NM_01323638 | TF<br>BS | TF<br>BS | 22<br>41 | 22<br>47 | 0.9963<br>05873 | + | . | TF=FOXL1;class=Fork head / winged helix factors;sequence=ATA AACA |
| ZEB1 NM_01323638 | TF<br>BS | TF<br>BS | 52<br>3  | 52<br>9  | 0.9963<br>05873 | - | . | TF=FOXL1;class=Fork head / winged helix factors;sequence=ATA AACA |
| ZEB1 NM_01323644 | TF<br>BS | TF<br>BS | 22<br>41 | 22<br>47 | 0.9963<br>05873 | + | . | TF=FOXL1;class=Fork head / winged helix factors;sequence=ATA AACA |
| ZEB1 NM_01323644 | TF<br>BS | TF<br>BS | 12<br>2  | 12<br>8  | 0.9963<br>05873 | - | . | TF=FOXL1;class=Fork head / winged helix factors;sequence=ATA AACA |
| ZEB1 NM_01323643 | TF<br>BS | TF<br>BS | 22<br>41 | 22<br>47 | 0.9963<br>05873 | + | . | TF=FOXL1;class=Fork head / winged helix factors;sequence=ATA AACA |
| ZEB1 NM_01323643 | TF<br>BS | TF<br>BS | 52<br>3  | 52<br>9  | 0.9963<br>05873 | - | . | TF=FOXL1;class=Fork head / winged helix factors;sequence=ATA AACA |
| ZEB1 NM_01323674 | TF<br>BS | TF<br>BS | 22<br>41 | 22<br>47 | 0.9963<br>05873 | + | . | TF=FOXL1;class=Fork head / winged helix factors;sequence=ATA AACA |
| ZEB1 NM_01323673 | TF<br>BS | TF<br>BS | 16<br>79 | 16<br>85 | 0.9963<br>05873 | + | . | TF=FOXL1;class=Fork head / winged helix factors;sequence=ATA AACA |
| ZEB1 NM_01323673 | TF<br>BS | TF<br>BS | 22<br>41 | 22<br>47 | 0.9963<br>05873 | + | . | TF=FOXL1;class=Fork head / winged helix factors;sequence=ATA AACA |
| ZEB1 NM_01323673 | TF<br>BS | TF<br>BS | 89<br>0  | 89<br>6  | 0.9963<br>05873 | - | . | TF=FOXL1;class=Fork head / winged helix factors;sequence=ATA AACA |
| ZEB1 NM_01323658 | TF<br>BS | TF<br>BS | 22<br>41 | 22<br>47 | 0.9963<br>05873 | + | . | TF=FOXL1;class=Fork head / winged helix factors;sequence=ATA AACA |

|                  |          |          |          |          |                 |   |   |                                                                   |
|------------------|----------|----------|----------|----------|-----------------|---|---|-------------------------------------------------------------------|
| ZEB1 NM_01323657 | TF<br>BS | TF<br>BS | 22<br>41 | 22<br>47 | 0.9963<br>05873 | + | . | TF=FOXL1;class=Fork head / winged helix factors;sequence=ATA AACA |
| ZEB1 NM_01323650 | TF<br>BS | TF<br>BS | 22<br>41 | 22<br>47 | 0.9963<br>05873 | + | . | TF=FOXL1;class=Fork head / winged helix factors;sequence=ATA AACA |
| ZEB1 NM_01323648 | TF<br>BS | TF<br>BS | 22<br>41 | 22<br>47 | 0.9963<br>05873 | + | . | TF=FOXL1;class=Fork head / winged helix factors;sequence=ATA AACA |
| ZEB1 NM_01174095 | TF<br>BS | TF<br>BS | 22<br>41 | 22<br>47 | 0.9963<br>05873 | + | . | TF=FOXL1;class=Fork head / winged helix factors;sequence=ATA AACA |
| ZEB1 NM_01323646 | TF<br>BS | TF<br>BS | 22<br>41 | 22<br>47 | 0.9963<br>05873 | + | . | TF=FOXL1;class=Fork head / winged helix factors;sequence=ATA AACA |
| ZEB1 NM_01323646 | TF<br>BS | TF<br>BS | 12<br>2  | 12<br>8  | 0.9963<br>05873 | - | . | TF=FOXL1;class=Fork head / winged helix factors;sequence=ATA AACA |
| ZEB1 NM_01323645 | TF<br>BS | TF<br>BS | 22<br>41 | 22<br>47 | 0.9963<br>05873 | + | . | TF=FOXL1;class=Fork head / winged helix factors;sequence=ATA AACA |
| ZEB1 NM_01323645 | TF<br>BS | TF<br>BS | 12<br>2  | 12<br>8  | 0.9963<br>05873 | - | . | TF=FOXL1;class=Fork head / winged helix factors;sequence=ATA AACA |
| ZEB1 NM_01174093 | TF<br>BS | TF<br>BS | 22<br>41 | 22<br>47 | 0.9963<br>05873 | + | . | TF=FOXL1;class=Fork head / winged helix factors;sequence=ATA AACA |
| ZEB1 NM_01323656 | TF<br>BS | TF<br>BS | 22<br>41 | 22<br>47 | 0.9963<br>05873 | + | . | TF=FOXL1;class=Fork head / winged helix factors;sequence=ATA AACA |
| ZEB1 NM_01323655 | TF<br>BS | TF<br>BS | 22<br>41 | 22<br>47 | 0.9963<br>05873 | + | . | TF=FOXL1;class=Fork head / winged helix factors;sequence=ATA AACA |



|                  |          |          |          |          |                 |   |   |                                                                   |
|------------------|----------|----------|----------|----------|-----------------|---|---|-------------------------------------------------------------------|
| ZEB1 NM_01323654 | TF<br>BS | TF<br>BS | 22<br>41 | 22<br>47 | 0.9963<br>05873 | + | . | TF=FOXL1;class=Fork head / winged helix factors;sequence=ATA AACA |
| ZEB1 NM_01323653 | TF<br>BS | TF<br>BS | 22<br>41 | 22<br>47 | 0.9963<br>05873 | + | . | TF=FOXL1;class=Fork head / winged helix factors;sequence=ATA AACA |
| ZEB1 NM_01323652 | TF<br>BS | TF<br>BS | 22<br>41 | 22<br>47 | 0.9963<br>05873 | + | . | TF=FOXL1;class=Fork head / winged helix factors;sequence=ATA AACA |
| ZEB1 NM_01323651 | TF<br>BS | TF<br>BS | 22<br>41 | 22<br>47 | 0.9963<br>05873 | + | . | TF=FOXL1;class=Fork head / winged helix factors;sequence=ATA AACA |
| ZEB1 NM_01323678 | TF<br>BS | TF<br>BS | 22<br>41 | 22<br>47 | 0.9963<br>05873 | + | . | TF=FOXL1;class=Fork head / winged helix factors;sequence=ATA AACA |
| ZEB1 NM_01323678 | TF<br>BS | TF<br>BS | 13<br>49 | 13<br>55 | 0.9963<br>05873 | - | . | TF=FOXL1;class=Fork head / winged helix factors;sequence=ATA AACA |
| ZEB1 NM_01323677 | TF<br>BS | TF<br>BS | 16<br>79 | 16<br>85 | 0.9963<br>05873 | + | . | TF=FOXL1;class=Fork head / winged helix factors;sequence=ATA AACA |
| ZEB1 NM_01323677 | TF<br>BS | TF<br>BS | 22<br>41 | 22<br>47 | 0.9963<br>05873 | + | . | TF=FOXL1;class=Fork head / winged helix factors;sequence=ATA AACA |
| ZEB1 NM_01323677 | TF<br>BS | TF<br>BS | 89<br>0  | 89<br>6  | 0.9963<br>05873 | - | . | TF=FOXL1;class=Fork head / winged helix factors;sequence=ATA AACA |
| ZEB1 NM_01323676 | TF<br>BS | TF<br>BS | 16<br>79 | 16<br>85 | 0.9963<br>05873 | + | . | TF=FOXL1;class=Fork head / winged helix factors;sequence=ATA AACA |
| ZEB1 NM_01323676 | TF<br>BS | TF<br>BS | 22<br>41 | 22<br>47 | 0.9963<br>05873 | + | . | TF=FOXL1;class=Fork head / winged helix factors;sequence=ATA AACA |

|                  |          |          |          |          |                 |   |   |                                                                   |
|------------------|----------|----------|----------|----------|-----------------|---|---|-------------------------------------------------------------------|
| ZEB1 NM_01323676 | TF<br>BS | TF<br>BS | 89<br>0  | 89<br>6  | 0.9963<br>05873 | - | . | TF=FOXL1;class=Fork head / winged helix factors;sequence=ATA AACA |
| ZEB1 NM_01323649 | TF<br>BS | TF<br>BS | 22<br>41 | 22<br>47 | 0.9963<br>05873 | + | . | TF=FOXL1;class=Fork head / winged helix factors;sequence=ATA AACA |
| ZEB1 NM_01323675 | TF<br>BS | TF<br>BS | 16<br>79 | 16<br>85 | 0.9963<br>05873 | + | . | TF=FOXL1;class=Fork head / winged helix factors;sequence=ATA AACA |
| ZEB1 NM_01323675 | TF<br>BS | TF<br>BS | 22<br>41 | 22<br>47 | 0.9963<br>05873 | + | . | TF=FOXL1;class=Fork head / winged helix factors;sequence=ATA AACA |
| ZEB1 NM_01323675 | TF<br>BS | TF<br>BS | 89<br>0  | 89<br>6  | 0.9963<br>05873 | - | . | TF=FOXL1;class=Fork head / winged helix factors;sequence=ATA AACA |
| ZEB1 NM_01323672 | TF<br>BS | TF<br>BS | 16<br>79 | 16<br>85 | 0.9963<br>05873 | + | . | TF=FOXL1;class=Fork head / winged helix factors;sequence=ATA AACA |
| ZEB1 NM_01323672 | TF<br>BS | TF<br>BS | 22<br>41 | 22<br>47 | 0.9963<br>05873 | + | . | TF=FOXL1;class=Fork head / winged helix factors;sequence=ATA AACA |
| ZEB1 NM_01323672 | TF<br>BS | TF<br>BS | 89<br>0  | 89<br>6  | 0.9963<br>05873 | - | . | TF=FOXL1;class=Fork head / winged helix factors;sequence=ATA AACA |
| ZEB1 NM_01323671 | TF<br>BS | TF<br>BS | 16<br>79 | 16<br>85 | 0.9963<br>05873 | + | . | TF=FOXL1;class=Fork head / winged helix factors;sequence=ATA AACA |
| ZEB1 NM_01323671 | TF<br>BS | TF<br>BS | 22<br>41 | 22<br>47 | 0.9963<br>05873 | + | . | TF=FOXL1;class=Fork head / winged helix factors;sequence=ATA AACA |
| ZEB1 NM_01323671 | TF<br>BS | TF<br>BS | 89<br>0  | 89<br>6  | 0.9963<br>05873 | - | . | TF=FOXL1;class=Fork head / winged helix factors;sequence=ATA AACA |

|                  |          |          |          |          |                 |   |   |                                                                   |
|------------------|----------|----------|----------|----------|-----------------|---|---|-------------------------------------------------------------------|
| ZEB1 NM_01323666 | TF<br>BS | TF<br>BS | 22<br>41 | 22<br>47 | 0.9963<br>05873 | + | . | TF=FOXL1;class=Fork head / winged helix factors;sequence=ATA AACA |
| ZEB1 NM_01323666 | TF<br>BS | TF<br>BS | 13<br>49 | 13<br>55 | 0.9963<br>05873 | - | . | TF=FOXL1;class=Fork head / winged helix factors;sequence=ATA AACA |
| ZEB1 NM_01323642 | TF<br>BS | TF<br>BS | 22<br>41 | 22<br>47 | 0.9963<br>05873 | + | . | TF=FOXL1;class=Fork head / winged helix factors;sequence=ATA AACA |
| ZEB1 NM_01323642 | TF<br>BS | TF<br>BS | 12<br>2  | 12<br>8  | 0.9963<br>05873 | - | . | TF=FOXL1;class=Fork head / winged helix factors;sequence=ATA AACA |
| ZEB1 NM_01174096 | TF<br>BS | TF<br>BS | 22<br>41 | 22<br>47 | 0.9963<br>05873 | + | . | TF=FOXL1;class=Fork head / winged helix factors;sequence=ATA AACA |
| ZEB1 NM_030751   | TF<br>BS | TF<br>BS | 22<br>41 | 22<br>47 | 0.9963<br>05873 | + | . | TF=FOXL1;class=Fork head / winged helix factors;sequence=ATA AACA |
| ZEB1 NM_01323665 | TF<br>BS | TF<br>BS | 22<br>41 | 22<br>47 | 0.9963<br>05873 | + | . | TF=FOXL1;class=Fork head / winged helix factors;sequence=ATA AACA |
| ZEB1 NM_01323665 | TF<br>BS | TF<br>BS | 13<br>49 | 13<br>55 | 0.9963<br>05873 | - | . | TF=FOXL1;class=Fork head / winged helix factors;sequence=ATA AACA |
| ZEB1 NM_01323664 | TF<br>BS | TF<br>BS | 22<br>41 | 22<br>47 | 0.9963<br>05873 | + | . | TF=FOXL1;class=Fork head / winged helix factors;sequence=ATA AACA |
| ZEB1 NM_01323664 | TF<br>BS | TF<br>BS | 13<br>49 | 13<br>55 | 0.9963<br>05873 | - | . | TF=FOXL1;class=Fork head / winged helix factors;sequence=ATA AACA |
| ZEB1 NM_01323663 | TF<br>BS | TF<br>BS | 22<br>41 | 22<br>47 | 0.9963<br>05873 | + | . | TF=FOXL1;class=Fork head / winged helix factors;sequence=ATA AACA |

|                  |          |          |          |          |                 |   |   |                                                                   |
|------------------|----------|----------|----------|----------|-----------------|---|---|-------------------------------------------------------------------|
| ZEB1 NM_01323663 | TF<br>BS | TF<br>BS | 13<br>49 | 13<br>55 | 0.9963<br>05873 | - | . | TF=FOXL1;class=Fork head / winged helix factors;sequence=ATA AACA |
| ZEB1 NM_01323662 | TF<br>BS | TF<br>BS | 22<br>41 | 22<br>47 | 0.9963<br>05873 | + | . | TF=FOXL1;class=Fork head / winged helix factors;sequence=ATA AACA |
| ZEB1 NM_01323662 | TF<br>BS | TF<br>BS | 13<br>49 | 13<br>55 | 0.9963<br>05873 | - | . | TF=FOXL1;class=Fork head / winged helix factors;sequence=ATA AACA |
| ZEB1 NM_01323661 | TF<br>BS | TF<br>BS | 22<br>41 | 22<br>47 | 0.9963<br>05873 | + | . | TF=FOXL1;class=Fork head / winged helix factors;sequence=ATA AACA |
| ZEB1 NM_01323660 | TF<br>BS | TF<br>BS | 22<br>41 | 22<br>47 | 0.9963<br>05873 | + | . | TF=FOXL1;class=Fork head / winged helix factors;sequence=ATA AACA |
| ZEB1 NM_01323659 | TF<br>BS | TF<br>BS | 22<br>41 | 22<br>47 | 0.9963<br>05873 | + | . | TF=FOXL1;class=Fork head / winged helix factors;sequence=ATA AACA |
| ZEB1 NM_01174094 | TF<br>BS | TF<br>BS | 22<br>41 | 22<br>47 | 0.9963<br>05873 | + | . | TF=FOXL1;class=Fork head / winged helix factors;sequence=ATA AACA |
| ZEB1 NM_01174094 | TF<br>BS | TF<br>BS | 13<br>49 | 13<br>55 | 0.9963<br>05873 | - | . | TF=FOXL1;class=Fork head / winged helix factors;sequence=ATA AACA |
| ZEB1 NM_01323647 | TF<br>BS | TF<br>BS | 27<br>6  | 28<br>3  | 0.9962<br>0351  | - | . | TF=HOXA4;class=Homeo domain factors;sequence=ATC ATTAG            |
| ZEB1 NM_01323641 | TF<br>BS | TF<br>BS | 67<br>4  | 68<br>1  | 0.9962<br>0351  | - | . | TF=HOXA4;class=Homeo domain factors;sequence=ATC ATTAG            |
| ZEB1 NM_01323638 | TF<br>BS | TF<br>BS | 10<br>75 | 10<br>82 | 0.9962<br>0351  | - | . | TF=HOXA4;class=Homeo domain factors;sequence=ATC ATTAG            |

|                  |          |          |          |          |                |   |   |                                                             |
|------------------|----------|----------|----------|----------|----------------|---|---|-------------------------------------------------------------|
| ZEB1 NM_01323644 | TF<br>BS | TF<br>BS | 67<br>4  | 68<br>1  | 0.9962<br>0351 | - | . | TF=HOXA4;class=Homo domain<br>factors;sequence=ATC<br>ATTAG |
| ZEB1 NM_01323643 | TF<br>BS | TF<br>BS | 10<br>75 | 10<br>82 | 0.9962<br>0351 | - | . | TF=HOXA4;class=Homo domain<br>factors;sequence=ATC<br>ATTAG |
| ZEB1 NM_01323674 | TF<br>BS | TF<br>BS | 27<br>6  | 28<br>3  | 0.9962<br>0351 | - | . | TF=HOXA4;class=Homo domain<br>factors;sequence=ATC<br>ATTAG |
| ZEB1 NM_01323650 | TF<br>BS | TF<br>BS | 27<br>6  | 28<br>3  | 0.9962<br>0351 | - | . | TF=HOXA4;class=Homo domain<br>factors;sequence=ATC<br>ATTAG |
| ZEB1 NM_01323648 | TF<br>BS | TF<br>BS | 27<br>6  | 28<br>3  | 0.9962<br>0351 | - | . | TF=HOXA4;class=Homo domain<br>factors;sequence=ATC<br>ATTAG |
| ZEB1 NM_01174095 | TF<br>BS | TF<br>BS | 27<br>6  | 28<br>3  | 0.9962<br>0351 | - | . | TF=HOXA4;class=Homo domain<br>factors;sequence=ATC<br>ATTAG |
| ZEB1 NM_01323646 | TF<br>BS | TF<br>BS | 67<br>4  | 68<br>1  | 0.9962<br>0351 | - | . | TF=HOXA4;class=Homo domain<br>factors;sequence=ATC<br>ATTAG |
| ZEB1 NM_01323645 | TF<br>BS | TF<br>BS | 67<br>4  | 68<br>1  | 0.9962<br>0351 | - | . | TF=HOXA4;class=Homo domain<br>factors;sequence=ATC<br>ATTAG |
| ZEB1 NM_01174093 | TF<br>BS | TF<br>BS | 27<br>6  | 28<br>3  | 0.9962<br>0351 | - | . | TF=HOXA4;class=Homo domain<br>factors;sequence=ATC<br>ATTAG |
| ZEB1 NM_01323655 | TF<br>BS | TF<br>BS | 27<br>6  | 28<br>3  | 0.9962<br>0351 | - | . | TF=HOXA4;class=Homo domain<br>factors;sequence=ATC<br>ATTAG |
| ZEB1 NM_01323654 | TF<br>BS | TF<br>BS | 27<br>6  | 28<br>3  | 0.9962<br>0351 | - | . | TF=HOXA4;class=Homo domain<br>factors;sequence=ATC<br>ATTAG |

|                  |          |          |          |          |                 |   |   |                                                             |
|------------------|----------|----------|----------|----------|-----------------|---|---|-------------------------------------------------------------|
| ZEB1 NM_01323653 | TF<br>BS | TF<br>BS | 27<br>6  | 28<br>3  | 0.9962<br>0351  | - | . | TF=HOXA4;class=Homo domain<br>factors;sequence=ATC<br>ATTAG |
| ZEB1 NM_01323652 | TF<br>BS | TF<br>BS | 27<br>6  | 28<br>3  | 0.9962<br>0351  | - | . | TF=HOXA4;class=Homo domain<br>factors;sequence=ATC<br>ATTAG |
| ZEB1 NM_01323651 | TF<br>BS | TF<br>BS | 27<br>6  | 28<br>3  | 0.9962<br>0351  | - | . | TF=HOXA4;class=Homo domain<br>factors;sequence=ATC<br>ATTAG |
| ZEB1 NM_01323649 | TF<br>BS | TF<br>BS | 27<br>6  | 28<br>3  | 0.9962<br>0351  | - | . | TF=HOXA4;class=Homo domain<br>factors;sequence=ATC<br>ATTAG |
| ZEB1 NM_01323642 | TF<br>BS | TF<br>BS | 67<br>4  | 68<br>1  | 0.9962<br>0351  | - | . | TF=HOXA4;class=Homo domain<br>factors;sequence=ATC<br>ATTAG |
| ZEB1 NM_01174096 | TF<br>BS | TF<br>BS | 27<br>6  | 28<br>3  | 0.9962<br>0351  | - | . | TF=HOXA4;class=Homo domain<br>factors;sequence=ATC<br>ATTAG |
| ZEB1 NM_030751   | TF<br>BS | TF<br>BS | 27<br>6  | 28<br>3  | 0.9962<br>0351  | - | . | TF=HOXA4;class=Homo domain<br>factors;sequence=ATC<br>ATTAG |
| ZEB1 NM_01323673 | TF<br>BS | TF<br>BS | 16<br>67 | 16<br>74 | 0.9961<br>79597 | - | . | TF=HOXD4;class=Homo domain<br>factors;sequence=ATA<br>ATTAA |
| ZEB1 NM_01323677 | TF<br>BS | TF<br>BS | 16<br>67 | 16<br>74 | 0.9961<br>79597 | - | . | TF=HOXD4;class=Homo domain<br>factors;sequence=ATA<br>ATTAA |
| ZEB1 NM_01323676 | TF<br>BS | TF<br>BS | 16<br>67 | 16<br>74 | 0.9961<br>79597 | - | . | TF=HOXD4;class=Homo domain<br>factors;sequence=ATA<br>ATTAA |
| ZEB1 NM_01323675 | TF<br>BS | TF<br>BS | 16<br>67 | 16<br>74 | 0.9961<br>79597 | - | . | TF=HOXD4;class=Homo domain<br>factors;sequence=ATA<br>ATTAA |

|                  |          |          |          |          |                 |   |   |                                                             |
|------------------|----------|----------|----------|----------|-----------------|---|---|-------------------------------------------------------------|
| ZEB1 NM_01323672 | TF<br>BS | TF<br>BS | 16<br>67 | 16<br>74 | 0.9961<br>79597 | - | . | TF=HOXD4;class=Homo domain<br>factors;sequence=ATAATTAA     |
| ZEB1 NM_01323671 | TF<br>BS | TF<br>BS | 16<br>67 | 16<br>74 | 0.9961<br>79597 | - | . | TF=HOXD4;class=Homo domain<br>factors;sequence=ATAATTAA     |
| ZEB1 NM_01128128 | TF<br>BS | TF<br>BS | 19<br>97 | 20<br>07 | 0.9960<br>93368 | - | . | TF=HOXA10;class=Homo domain<br>factors;sequence=GGCAATAAAAA |
| ZEB1 NM_01323678 | TF<br>BS | TF<br>BS | 19<br>97 | 20<br>07 | 0.9960<br>93368 | - | . | TF=HOXA10;class=Homo domain<br>factors;sequence=GGCAATAAAAA |
| ZEB1 NM_01323666 | TF<br>BS | TF<br>BS | 19<br>97 | 20<br>07 | 0.9960<br>93368 | - | . | TF=HOXA10;class=Homo domain<br>factors;sequence=GGCAATAAAAA |
| ZEB1 NM_01323665 | TF<br>BS | TF<br>BS | 19<br>97 | 20<br>07 | 0.9960<br>93368 | - | . | TF=HOXA10;class=Homo domain<br>factors;sequence=GGCAATAAAAA |
| ZEB1 NM_01323664 | TF<br>BS | TF<br>BS | 19<br>97 | 20<br>07 | 0.9960<br>93368 | - | . | TF=HOXA10;class=Homo domain<br>factors;sequence=GGCAATAAAAA |
| ZEB1 NM_01323663 | TF<br>BS | TF<br>BS | 19<br>97 | 20<br>07 | 0.9960<br>93368 | - | . | TF=HOXA10;class=Homo domain<br>factors;sequence=GGCAATAAAAA |
| ZEB1 NM_01323662 | TF<br>BS | TF<br>BS | 19<br>97 | 20<br>07 | 0.9960<br>93368 | - | . | TF=HOXA10;class=Homo domain<br>factors;sequence=GGCAATAAAAA |
| ZEB1 NM_01174094 | TF<br>BS | TF<br>BS | 19<br>97 | 20<br>07 | 0.9960<br>93368 | - | . | TF=HOXA10;class=Homo domain<br>factors;sequence=GGCAATAAAAA |
| ZEB1 NM_01323647 | TF<br>BS | TF<br>BS | 19<br>97 | 20<br>06 | 0.9957<br>77597 | - | . | TF=HOXD9;class=Homo domain<br>factors;sequence=GCAATAAAAT   |

|                  |          |          |          |          |                 |   |   |                                                            |
|------------------|----------|----------|----------|----------|-----------------|---|---|------------------------------------------------------------|
| ZEB1 NM_01323674 | TF<br>BS | TF<br>BS | 19<br>97 | 20<br>06 | 0.9957<br>77597 | - | . | TF=HOXD9;class=Homeo domain<br>factors;sequence=GCAATAAAAT |
| ZEB1 NM_01323650 | TF<br>BS | TF<br>BS | 19<br>97 | 20<br>06 | 0.9957<br>77597 | - | . | TF=HOXD9;class=Homeo domain<br>factors;sequence=GCAATAAAAT |
| ZEB1 NM_01323648 | TF<br>BS | TF<br>BS | 19<br>97 | 20<br>06 | 0.9957<br>77597 | - | . | TF=HOXD9;class=Homeo domain<br>factors;sequence=GCAATAAAAT |
| ZEB1 NM_01174095 | TF<br>BS | TF<br>BS | 19<br>97 | 20<br>06 | 0.9957<br>77597 | - | . | TF=HOXD9;class=Homeo domain<br>factors;sequence=GCAATAAAAT |
| ZEB1 NM_01174093 | TF<br>BS | TF<br>BS | 19<br>97 | 20<br>06 | 0.9957<br>77597 | - | . | TF=HOXD9;class=Homeo domain<br>factors;sequence=GCAATAAAAT |
| ZEB1 NM_01323655 | TF<br>BS | TF<br>BS | 19<br>97 | 20<br>06 | 0.9957<br>77597 | - | . | TF=HOXD9;class=Homeo domain<br>factors;sequence=GCAATAAAAT |
| ZEB1 NM_01323654 | TF<br>BS | TF<br>BS | 19<br>97 | 20<br>06 | 0.9957<br>77597 | - | . | TF=HOXD9;class=Homeo domain<br>factors;sequence=GCAATAAAAT |
| ZEB1 NM_01323653 | TF<br>BS | TF<br>BS | 19<br>97 | 20<br>06 | 0.9957<br>77597 | - | . | TF=HOXD9;class=Homeo domain<br>factors;sequence=GCAATAAAAT |
| ZEB1 NM_01323652 | TF<br>BS | TF<br>BS | 19<br>97 | 20<br>06 | 0.9957<br>77597 | - | . | TF=HOXD9;class=Homeo domain<br>factors;sequence=GCAATAAAAT |
| ZEB1 NM_01323651 | TF<br>BS | TF<br>BS | 19<br>97 | 20<br>06 | 0.9957<br>77597 | - | . | TF=HOXD9;class=Homeo domain<br>factors;sequence=GCAATAAAAT |
| ZEB1 NM_01323649 | TF<br>BS | TF<br>BS | 19<br>97 | 20<br>06 | 0.9957<br>77597 | - | . | TF=HOXD9;class=Homeo domain<br>factors;sequence=GCAATAAAAT |



|                   |          |          |          |          |                 |   |   |                                                                    |
|-------------------|----------|----------|----------|----------|-----------------|---|---|--------------------------------------------------------------------|
| ZEB1 NM_001174096 | TF<br>BS | TF<br>BS | 19<br>97 | 20<br>06 | 0.9957<br>77597 | - | . | TF=HOXD9;class=Homeo domain<br>factors;sequence=GCAATAAAAAT        |
| ZEB1 NM_0030751   | TF<br>BS | TF<br>BS | 19<br>97 | 20<br>06 | 0.9957<br>77597 | - | . | TF=HOXD9;class=Homeo domain<br>factors;sequence=GCAATAAAAAT        |
| ZEB1 NM_001128128 | TF<br>BS | TF<br>BS | 19<br>97 | 20<br>06 | 0.9954<br>82444 | - | . | TF=HOXD9;class=Homeo domain<br>factors;sequence=GCAATAAAAA         |
| ZEB1 NM_001323678 | TF<br>BS | TF<br>BS | 19<br>97 | 20<br>06 | 0.9954<br>82444 | - | . | TF=HOXD9;class=Homeo domain<br>factors;sequence=GCAATAAAAA         |
| ZEB1 NM_001323666 | TF<br>BS | TF<br>BS | 19<br>97 | 20<br>06 | 0.9954<br>82444 | - | . | TF=HOXD9;class=Homeo domain<br>factors;sequence=GCAATAAAAA         |
| ZEB1 NM_001323665 | TF<br>BS | TF<br>BS | 19<br>97 | 20<br>06 | 0.9954<br>82444 | - | . | TF=HOXD9;class=Homeo domain<br>factors;sequence=GCAATAAAAA         |
| ZEB1 NM_001323664 | TF<br>BS | TF<br>BS | 19<br>97 | 20<br>06 | 0.9954<br>82444 | - | . | TF=HOXD9;class=Homeo domain<br>factors;sequence=GCAATAAAAA         |
| ZEB1 NM_001323663 | TF<br>BS | TF<br>BS | 19<br>97 | 20<br>06 | 0.9954<br>82444 | - | . | TF=HOXD9;class=Homeo domain<br>factors;sequence=GCAATAAAAA         |
| ZEB1 NM_001323662 | TF<br>BS | TF<br>BS | 19<br>97 | 20<br>06 | 0.9954<br>82444 | - | . | TF=HOXD9;class=Homeo domain<br>factors;sequence=GCAATAAAAA         |
| ZEB1 NM_001174094 | TF<br>BS | TF<br>BS | 19<br>97 | 20<br>06 | 0.9954<br>82444 | - | . | TF=HOXD9;class=Homeo domain<br>factors;sequence=GCAATAAAAA         |
| ZEB1 NM_001128128 | TF<br>BS | TF<br>BS | 13<br>69 | 13<br>77 | 0.9953<br>88085 | + | . | TF=NFIX;class=SMAD/NF-1 DNA-binding domain<br>factors;sequence=TGT |

|                  |          |          |          |          |                 |   |   |                                                                                               |
|------------------|----------|----------|----------|----------|-----------------|---|---|-----------------------------------------------------------------------------------------------|
| ZEB1 NM_01323673 | TF<br>BS | TF<br>BS | 91<br>0  | 91<br>8  | 0.9953<br>88085 | + | . | GCCAAG<br>TF=NFIX;class=SMAD<br>/NF-1 DNA-binding<br>domain<br>factors;sequence=TGT<br>GCCAAG |
| ZEB1 NM_01323678 | TF<br>BS | TF<br>BS | 13<br>69 | 13<br>77 | 0.9953<br>88085 | + | . | TF=NFIX;class=SMAD<br>/NF-1 DNA-binding<br>domain<br>factors;sequence=TGT<br>GCCAAG           |
| ZEB1 NM_01323677 | TF<br>BS | TF<br>BS | 91<br>0  | 91<br>8  | 0.9953<br>88085 | + | . | TF=NFIX;class=SMAD<br>/NF-1 DNA-binding<br>domain<br>factors;sequence=TGT<br>GCCAAG           |
| ZEB1 NM_01323676 | TF<br>BS | TF<br>BS | 91<br>0  | 91<br>8  | 0.9953<br>88085 | + | . | TF=NFIX;class=SMAD<br>/NF-1 DNA-binding<br>domain<br>factors;sequence=TGT<br>GCCAAG           |
| ZEB1 NM_01323675 | TF<br>BS | TF<br>BS | 91<br>0  | 91<br>8  | 0.9953<br>88085 | + | . | TF=NFIX;class=SMAD<br>/NF-1 DNA-binding<br>domain<br>factors;sequence=TGT<br>GCCAAG           |
| ZEB1 NM_01323672 | TF<br>BS | TF<br>BS | 91<br>0  | 91<br>8  | 0.9953<br>88085 | + | . | TF=NFIX;class=SMAD<br>/NF-1 DNA-binding<br>domain<br>factors;sequence=TGT<br>GCCAAG           |
| ZEB1 NM_01323671 | TF<br>BS | TF<br>BS | 91<br>0  | 91<br>8  | 0.9953<br>88085 | + | . | TF=NFIX;class=SMAD<br>/NF-1 DNA-binding<br>domain<br>factors;sequence=TGT<br>GCCAAG           |
| ZEB1 NM_01323666 | TF<br>BS | TF<br>BS | 13<br>69 | 13<br>77 | 0.9953<br>88085 | + | . | TF=NFIX;class=SMAD<br>/NF-1 DNA-binding<br>domain<br>factors;sequence=TGT<br>GCCAAG           |
| ZEB1 NM_01323665 | TF<br>BS | TF<br>BS | 13<br>69 | 13<br>77 | 0.9953<br>88085 | + | . | TF=NFIX;class=SMAD<br>/NF-1 DNA-binding<br>domain                                             |

|                  |          |          |          |          |                 |   |   |                                                                                                                       |
|------------------|----------|----------|----------|----------|-----------------|---|---|-----------------------------------------------------------------------------------------------------------------------|
| ZEB1 NM_01323664 | TF<br>BS | TF<br>BS | 13<br>69 | 13<br>77 | 0.9953<br>88085 | + | . | factors;sequence=TGT<br>GCCAAG<br>TF=NFIX;class=SMAD<br>/NF-1 DNA-binding<br>domain<br>factors;sequence=TGT<br>GCCAAG |
| ZEB1 NM_01323663 | TF<br>BS | TF<br>BS | 13<br>69 | 13<br>77 | 0.9953<br>88085 | + | . | TF=NFIX;class=SMAD<br>/NF-1 DNA-binding<br>domain<br>factors;sequence=TGT<br>GCCAAG                                   |
| ZEB1 NM_01323662 | TF<br>BS | TF<br>BS | 13<br>69 | 13<br>77 | 0.9953<br>88085 | + | . | TF=NFIX;class=SMAD<br>/NF-1 DNA-binding<br>domain<br>factors;sequence=TGT<br>GCCAAG                                   |
| ZEB1 NM_01174094 | TF<br>BS | TF<br>BS | 13<br>69 | 13<br>77 | 0.9953<br>88085 | + | . | TF=NFIX;class=SMAD<br>/NF-1 DNA-binding<br>domain<br>factors;sequence=TGT<br>GCCAAG                                   |
| ZEB1 NM_01323638 | TF<br>BS | TF<br>BS | 39<br>5  | 40<br>2  | 0.9953<br>249   | - | . | TF=HOXA4;class=Ho<br>meo domain<br>factors;sequence=GTC<br>ATTAA                                                      |
| ZEB1 NM_01323643 | TF<br>BS | TF<br>BS | 39<br>5  | 40<br>2  | 0.9953<br>249   | - | . | TF=HOXA4;class=Ho<br>meo domain<br>factors;sequence=GTC<br>ATTAA                                                      |
| ZEB1 NM_01323647 | TF<br>BS | TF<br>BS | 97<br>1  | 97<br>7  | 0.9949<br>89704 | - | . | TF=MEIS1;class=Hom<br>eo domain<br>factors;sequence=CTG<br>ACAG                                                       |
| ZEB1 NM_01323641 | TF<br>BS | TF<br>BS | 13<br>69 | 13<br>75 | 0.9949<br>89704 | - | . | TF=MEIS1;class=Hom<br>eo domain<br>factors;sequence=CTG<br>ACAG                                                       |
| ZEB1 NM_01323638 | TF<br>BS | TF<br>BS | 17<br>70 | 17<br>76 | 0.9949<br>89704 | - | . | TF=MEIS1;class=Hom<br>eo domain<br>factors;sequence=CTG<br>ACAG                                                       |
| ZEB1 NM_01323644 | TF<br>BS | TF<br>BS | 13<br>69 | 13<br>75 | 0.9949<br>89704 | - | . | TF=MEIS1;class=Hom<br>eo domain                                                                                       |

|                       |          |          |          |          |                 |   |   |                                                                 |
|-----------------------|----------|----------|----------|----------|-----------------|---|---|-----------------------------------------------------------------|
|                       |          |          |          |          |                 |   |   | factors;sequence=CTG<br>ACAG                                    |
| ZEB1 NM_0<br>01323643 | TF<br>BS | TF<br>BS | 17<br>70 | 17<br>76 | 0.9949<br>89704 | - | . | TF=MEIS1;class=Hom<br>eo domain<br>factors;sequence=CTG<br>ACAG |
| ZEB1 NM_0<br>01323674 | TF<br>BS | TF<br>BS | 97<br>1  | 97<br>7  | 0.9949<br>89704 | - | . | TF=MEIS1;class=Hom<br>eo domain<br>factors;sequence=CTG<br>ACAG |
| ZEB1 NM_0<br>01323658 | TF<br>BS | TF<br>BS | 41<br>9  | 42<br>5  | 0.9949<br>89704 | - | . | TF=MEIS1;class=Hom<br>eo domain<br>factors;sequence=CTG<br>ACAG |
| ZEB1 NM_0<br>01323657 | TF<br>BS | TF<br>BS | 41<br>9  | 42<br>5  | 0.9949<br>89704 | - | . | TF=MEIS1;class=Hom<br>eo domain<br>factors;sequence=CTG<br>ACAG |
| ZEB1 NM_0<br>01323650 | TF<br>BS | TF<br>BS | 97<br>1  | 97<br>7  | 0.9949<br>89704 | - | . | TF=MEIS1;class=Hom<br>eo domain<br>factors;sequence=CTG<br>ACAG |
| ZEB1 NM_0<br>01323648 | TF<br>BS | TF<br>BS | 97<br>1  | 97<br>7  | 0.9949<br>89704 | - | . | TF=MEIS1;class=Hom<br>eo domain<br>factors;sequence=CTG<br>ACAG |
| ZEB1 NM_0<br>01174095 | TF<br>BS | TF<br>BS | 97<br>1  | 97<br>7  | 0.9949<br>89704 | - | . | TF=MEIS1;class=Hom<br>eo domain<br>factors;sequence=CTG<br>ACAG |
| ZEB1 NM_0<br>01323646 | TF<br>BS | TF<br>BS | 13<br>69 | 13<br>75 | 0.9949<br>89704 | - | . | TF=MEIS1;class=Hom<br>eo domain<br>factors;sequence=CTG<br>ACAG |
| ZEB1 NM_0<br>01323645 | TF<br>BS | TF<br>BS | 13<br>69 | 13<br>75 | 0.9949<br>89704 | - | . | TF=MEIS1;class=Hom<br>eo domain<br>factors;sequence=CTG<br>ACAG |
| ZEB1 NM_0<br>01174093 | TF<br>BS | TF<br>BS | 97<br>1  | 97<br>7  | 0.9949<br>89704 | - | . | TF=MEIS1;class=Hom<br>eo domain<br>factors;sequence=CTG<br>ACAG |
| ZEB1 NM_0<br>01323656 | TF<br>BS | TF<br>BS | 41<br>9  | 42<br>5  | 0.9949<br>89704 | - | . | TF=MEIS1;class=Hom<br>eo domain                                 |

|                       |          |          |          |          |                 |   |   |  |                                                                    |
|-----------------------|----------|----------|----------|----------|-----------------|---|---|--|--------------------------------------------------------------------|
|                       |          |          |          |          |                 |   |   |  | factors;sequence=CTG<br>ACAG                                       |
| ZEB1 NM_0<br>01323655 | TF<br>BS | TF<br>BS | 97<br>1  | 97<br>7  | 0.9949<br>89704 | - | . |  | TF=MEIS1;class=Hom<br>eo domain<br>factors;sequence=CTG<br>ACAG    |
| ZEB1 NM_0<br>01323654 | TF<br>BS | TF<br>BS | 97<br>1  | 97<br>7  | 0.9949<br>89704 | - | . |  | TF=MEIS1;class=Hom<br>eo domain<br>factors;sequence=CTG<br>ACAG    |
| ZEB1 NM_0<br>01323653 | TF<br>BS | TF<br>BS | 97<br>1  | 97<br>7  | 0.9949<br>89704 | - | . |  | TF=MEIS1;class=Hom<br>eo domain<br>factors;sequence=CTG<br>ACAG    |
| ZEB1 NM_0<br>01323652 | TF<br>BS | TF<br>BS | 97<br>1  | 97<br>7  | 0.9949<br>89704 | - | . |  | TF=MEIS1;class=Hom<br>eo domain<br>factors;sequence=CTG<br>ACAG    |
| ZEB1 NM_0<br>01323651 | TF<br>BS | TF<br>BS | 97<br>1  | 97<br>7  | 0.9949<br>89704 | - | . |  | TF=MEIS1;class=Hom<br>eo domain<br>factors;sequence=CTG<br>ACAG    |
| ZEB1 NM_0<br>01323649 | TF<br>BS | TF<br>BS | 97<br>1  | 97<br>7  | 0.9949<br>89704 | - | . |  | TF=MEIS1;class=Hom<br>eo domain<br>factors;sequence=CTG<br>ACAG    |
| ZEB1 NM_0<br>01323642 | TF<br>BS | TF<br>BS | 13<br>69 | 13<br>75 | 0.9949<br>89704 | - | . |  | TF=MEIS1;class=Hom<br>eo domain<br>factors;sequence=CTG<br>ACAG    |
| ZEB1 NM_0<br>01174096 | TF<br>BS | TF<br>BS | 97<br>1  | 97<br>7  | 0.9949<br>89704 | - | . |  | TF=MEIS1;class=Hom<br>eo domain<br>factors;sequence=CTG<br>ACAG    |
| ZEB1 NM_0<br>30751    | TF<br>BS | TF<br>BS | 97<br>1  | 97<br>7  | 0.9949<br>89704 | - | . |  | TF=MEIS1;class=Hom<br>eo domain<br>factors;sequence=CTG<br>ACAG    |
| ZEB1 NM_0<br>01323661 | TF<br>BS | TF<br>BS | 19<br>97 | 20<br>07 | 0.9949<br>04316 | - | . |  | TF=CDX1;class=Home<br>o domain<br>factors;sequence=GGC<br>AATAAAAC |
| ZEB1 NM_0<br>01323660 | TF<br>BS | TF<br>BS | 19<br>97 | 20<br>07 | 0.9949<br>04316 | - | . |  | TF=CDX1;class=Home<br>o domain                                     |

|                  |          |          |          |          |                 |   |   |                                                                                                        |
|------------------|----------|----------|----------|----------|-----------------|---|---|--------------------------------------------------------------------------------------------------------|
| ZEB1 NM_01323659 | TF<br>BS | TF<br>BS | 19<br>97 | 20<br>07 | 0.9949<br>04316 | - | . | factors;sequence=GGC<br>AATAAAAC<br>TF=CDX1;class=Home<br>o domain<br>factors;sequence=GGC<br>AATAAAAC |
| ZEB1 NM_01323673 | TF<br>BS | TF<br>BS | 16<br>67 | 16<br>74 | 0.9940<br>71307 | - | . | TF=HOXC4;class=Ho<br>meo domain<br>factors;sequence=ATA<br>ATTAA                                       |
| ZEB1 NM_01323677 | TF<br>BS | TF<br>BS | 16<br>67 | 16<br>74 | 0.9940<br>71307 | - | . | TF=HOXC4;class=Ho<br>meo domain<br>factors;sequence=ATA<br>ATTAA                                       |
| ZEB1 NM_01323676 | TF<br>BS | TF<br>BS | 16<br>67 | 16<br>74 | 0.9940<br>71307 | - | . | TF=HOXC4;class=Ho<br>meo domain<br>factors;sequence=ATA<br>ATTAA                                       |
| ZEB1 NM_01323675 | TF<br>BS | TF<br>BS | 16<br>67 | 16<br>74 | 0.9940<br>71307 | - | . | TF=HOXC4;class=Ho<br>meo domain<br>factors;sequence=ATA<br>ATTAA                                       |
| ZEB1 NM_01323672 | TF<br>BS | TF<br>BS | 16<br>67 | 16<br>74 | 0.9940<br>71307 | - | . | TF=HOXC4;class=Ho<br>meo domain<br>factors;sequence=ATA<br>ATTAA                                       |
| ZEB1 NM_01323671 | TF<br>BS | TF<br>BS | 16<br>67 | 16<br>74 | 0.9940<br>71307 | - | . | TF=HOXC4;class=Ho<br>meo domain<br>factors;sequence=ATA<br>ATTAA                                       |
| ZEB1 NM_01323647 | TF<br>BS | TF<br>BS | 19<br>41 | 19<br>46 | 0.9940<br>48003 | - | . | TF=ZNF354C;class=C2<br>H2 zinc finger<br>factors;sequence=CTC<br>CAC                                   |
| ZEB1 NM_01128128 | TF<br>BS | TF<br>BS | 20<br>9  | 21<br>4  | 0.9940<br>48003 | - | . | TF=ZNF354C;class=C2<br>H2 zinc finger<br>factors;sequence=CTC<br>CAC                                   |
| ZEB1 NM_01128128 | TF<br>BS | TF<br>BS | 44<br>5  | 45<br>0  | 0.9940<br>48003 | - | . | TF=ZNF354C;class=C2<br>H2 zinc finger<br>factors;sequence=CTC<br>CAC                                   |
| ZEB1 NM_01323641 | TF<br>BS | TF<br>BS | 15<br>3  | 15<br>8  | 0.9940<br>48003 | + | . | TF=ZNF354C;class=C2<br>H2 zinc finger                                                                  |

|                       |          |          |          |          |                 |   |   |                                                                      |
|-----------------------|----------|----------|----------|----------|-----------------|---|---|----------------------------------------------------------------------|
|                       |          |          |          |          |                 |   |   | factors;sequence=CTC<br>CAC                                          |
| ZEB1 NM_0<br>01323638 | TF<br>BS | TF<br>BS | 55<br>4  | 55<br>9  | 0.9940<br>48003 | + | . | TF=ZNF354C;class=C2<br>H2 zinc finger<br>factors;sequence=CTC<br>CAC |
| ZEB1 NM_0<br>01323644 | TF<br>BS | TF<br>BS | 15<br>3  | 15<br>8  | 0.9940<br>48003 | + | . | TF=ZNF354C;class=C2<br>H2 zinc finger<br>factors;sequence=CTC<br>CAC |
| ZEB1 NM_0<br>01323643 | TF<br>BS | TF<br>BS | 55<br>4  | 55<br>9  | 0.9940<br>48003 | + | . | TF=ZNF354C;class=C2<br>H2 zinc finger<br>factors;sequence=CTC<br>CAC |
| ZEB1 NM_0<br>01323674 | TF<br>BS | TF<br>BS | 19<br>41 | 19<br>46 | 0.9940<br>48003 | - | . | TF=ZNF354C;class=C2<br>H2 zinc finger<br>factors;sequence=CTC<br>CAC |
| ZEB1 NM_0<br>01323673 | TF<br>BS | TF<br>BS | 17<br>43 | 17<br>48 | 0.9940<br>48003 | - | . | TF=ZNF354C;class=C2<br>H2 zinc finger<br>factors;sequence=CTC<br>CAC |
| ZEB1 NM_0<br>01323673 | TF<br>BS | TF<br>BS | 17<br>71 | 17<br>76 | 0.9940<br>48003 | - | . | TF=ZNF354C;class=C2<br>H2 zinc finger<br>factors;sequence=CTC<br>CAC |
| ZEB1 NM_0<br>01323658 | TF<br>BS | TF<br>BS | 13<br>89 | 13<br>94 | 0.9940<br>48003 | - | . | TF=ZNF354C;class=C2<br>H2 zinc finger<br>factors;sequence=CTC<br>CAC |
| ZEB1 NM_0<br>01323658 | TF<br>BS | TF<br>BS | 16<br>42 | 16<br>47 | 0.9940<br>48003 | - | . | TF=ZNF354C;class=C2<br>H2 zinc finger<br>factors;sequence=CTC<br>CAC |
| ZEB1 NM_0<br>01323658 | TF<br>BS | TF<br>BS | 18<br>78 | 18<br>83 | 0.9940<br>48003 | - | . | TF=ZNF354C;class=C2<br>H2 zinc finger<br>factors;sequence=CTC<br>CAC |
| ZEB1 NM_0<br>01323657 | TF<br>BS | TF<br>BS | 13<br>89 | 13<br>94 | 0.9940<br>48003 | - | . | TF=ZNF354C;class=C2<br>H2 zinc finger<br>factors;sequence=CTC<br>CAC |
| ZEB1 NM_0<br>01323657 | TF<br>BS | TF<br>BS | 16<br>42 | 16<br>47 | 0.9940<br>48003 | - | . | TF=ZNF354C;class=C2<br>H2 zinc finger                                |

|                       |          |          |          |          |                 |   |   |                                                                      |
|-----------------------|----------|----------|----------|----------|-----------------|---|---|----------------------------------------------------------------------|
|                       |          |          |          |          |                 |   |   | factors;sequence=CTC<br>CAC                                          |
| ZEB1 NM_0<br>01323657 | TF<br>BS | TF<br>BS | 18<br>78 | 18<br>83 | 0.9940<br>48003 | - | . | TF=ZNF354C;class=C2<br>H2 zinc finger<br>factors;sequence=CTC<br>CAC |
| ZEB1 NM_0<br>01323650 | TF<br>BS | TF<br>BS | 19<br>41 | 19<br>46 | 0.9940<br>48003 | - | . | TF=ZNF354C;class=C2<br>H2 zinc finger<br>factors;sequence=CTC<br>CAC |
| ZEB1 NM_0<br>01323648 | TF<br>BS | TF<br>BS | 19<br>41 | 19<br>46 | 0.9940<br>48003 | - | . | TF=ZNF354C;class=C2<br>H2 zinc finger<br>factors;sequence=CTC<br>CAC |
| ZEB1 NM_0<br>01174095 | TF<br>BS | TF<br>BS | 19<br>41 | 19<br>46 | 0.9940<br>48003 | - | . | TF=ZNF354C;class=C2<br>H2 zinc finger<br>factors;sequence=CTC<br>CAC |
| ZEB1 NM_0<br>01323646 | TF<br>BS | TF<br>BS | 15<br>3  | 15<br>8  | 0.9940<br>48003 | + | . | TF=ZNF354C;class=C2<br>H2 zinc finger<br>factors;sequence=CTC<br>CAC |
| ZEB1 NM_0<br>01323645 | TF<br>BS | TF<br>BS | 15<br>3  | 15<br>8  | 0.9940<br>48003 | + | . | TF=ZNF354C;class=C2<br>H2 zinc finger<br>factors;sequence=CTC<br>CAC |
| ZEB1 NM_0<br>01174093 | TF<br>BS | TF<br>BS | 19<br>41 | 19<br>46 | 0.9940<br>48003 | - | . | TF=ZNF354C;class=C2<br>H2 zinc finger<br>factors;sequence=CTC<br>CAC |
| ZEB1 NM_0<br>01323656 | TF<br>BS | TF<br>BS | 13<br>89 | 13<br>94 | 0.9940<br>48003 | - | . | TF=ZNF354C;class=C2<br>H2 zinc finger<br>factors;sequence=CTC<br>CAC |
| ZEB1 NM_0<br>01323656 | TF<br>BS | TF<br>BS | 16<br>42 | 16<br>47 | 0.9940<br>48003 | - | . | TF=ZNF354C;class=C2<br>H2 zinc finger<br>factors;sequence=CTC<br>CAC |
| ZEB1 NM_0<br>01323656 | TF<br>BS | TF<br>BS | 18<br>78 | 18<br>83 | 0.9940<br>48003 | - | . | TF=ZNF354C;class=C2<br>H2 zinc finger<br>factors;sequence=CTC<br>CAC |
| ZEB1 NM_0<br>01323655 | TF<br>BS | TF<br>BS | 19<br>41 | 19<br>46 | 0.9940<br>48003 | - | . | TF=ZNF354C;class=C2<br>H2 zinc finger                                |



|                       |          |          |          |          |                 |   |   |                                                                      |
|-----------------------|----------|----------|----------|----------|-----------------|---|---|----------------------------------------------------------------------|
|                       |          |          |          |          |                 |   |   | factors;sequence=CTC<br>CAC                                          |
| ZEB1 NM_0<br>01323654 | TF<br>BS | TF<br>BS | 19<br>41 | 19<br>46 | 0.9940<br>48003 | - | . | TF=ZNF354C;class=C2<br>H2 zinc finger<br>factors;sequence=CTC<br>CAC |
| ZEB1 NM_0<br>01323653 | TF<br>BS | TF<br>BS | 19<br>41 | 19<br>46 | 0.9940<br>48003 | - | . | TF=ZNF354C;class=C2<br>H2 zinc finger<br>factors;sequence=CTC<br>CAC |
| ZEB1 NM_0<br>01323652 | TF<br>BS | TF<br>BS | 19<br>41 | 19<br>46 | 0.9940<br>48003 | - | . | TF=ZNF354C;class=C2<br>H2 zinc finger<br>factors;sequence=CTC<br>CAC |
| ZEB1 NM_0<br>01323651 | TF<br>BS | TF<br>BS | 19<br>41 | 19<br>46 | 0.9940<br>48003 | - | . | TF=ZNF354C;class=C2<br>H2 zinc finger<br>factors;sequence=CTC<br>CAC |
| ZEB1 NM_0<br>01323678 | TF<br>BS | TF<br>BS | 20<br>9  | 21<br>4  | 0.9940<br>48003 | - | . | TF=ZNF354C;class=C2<br>H2 zinc finger<br>factors;sequence=CTC<br>CAC |
| ZEB1 NM_0<br>01323678 | TF<br>BS | TF<br>BS | 44<br>5  | 45<br>0  | 0.9940<br>48003 | - | . | TF=ZNF354C;class=C2<br>H2 zinc finger<br>factors;sequence=CTC<br>CAC |
| ZEB1 NM_0<br>01323677 | TF<br>BS | TF<br>BS | 17<br>43 | 17<br>48 | 0.9940<br>48003 | - | . | TF=ZNF354C;class=C2<br>H2 zinc finger<br>factors;sequence=CTC<br>CAC |
| ZEB1 NM_0<br>01323677 | TF<br>BS | TF<br>BS | 17<br>71 | 17<br>76 | 0.9940<br>48003 | - | . | TF=ZNF354C;class=C2<br>H2 zinc finger<br>factors;sequence=CTC<br>CAC |
| ZEB1 NM_0<br>01323676 | TF<br>BS | TF<br>BS | 17<br>43 | 17<br>48 | 0.9940<br>48003 | - | . | TF=ZNF354C;class=C2<br>H2 zinc finger<br>factors;sequence=CTC<br>CAC |
| ZEB1 NM_0<br>01323676 | TF<br>BS | TF<br>BS | 17<br>71 | 17<br>76 | 0.9940<br>48003 | - | . | TF=ZNF354C;class=C2<br>H2 zinc finger<br>factors;sequence=CTC<br>CAC |
| ZEB1 NM_0<br>01323649 | TF<br>BS | TF<br>BS | 19<br>41 | 19<br>46 | 0.9940<br>48003 | - | . | TF=ZNF354C;class=C2<br>H2 zinc finger                                |

|                       |          |          |          |          |                 |   |   |                                                                      |
|-----------------------|----------|----------|----------|----------|-----------------|---|---|----------------------------------------------------------------------|
|                       |          |          |          |          |                 |   |   | factors;sequence=CTC<br>CAC                                          |
| ZEB1 NM_0<br>01323675 | TF<br>BS | TF<br>BS | 17<br>43 | 17<br>48 | 0.9940<br>48003 | - | . | TF=ZNF354C;class=C2<br>H2 zinc finger<br>factors;sequence=CTC<br>CAC |
| ZEB1 NM_0<br>01323675 | TF<br>BS | TF<br>BS | 17<br>71 | 17<br>76 | 0.9940<br>48003 | - | . | TF=ZNF354C;class=C2<br>H2 zinc finger<br>factors;sequence=CTC<br>CAC |
| ZEB1 NM_0<br>01323672 | TF<br>BS | TF<br>BS | 17<br>43 | 17<br>48 | 0.9940<br>48003 | - | . | TF=ZNF354C;class=C2<br>H2 zinc finger<br>factors;sequence=CTC<br>CAC |
| ZEB1 NM_0<br>01323672 | TF<br>BS | TF<br>BS | 17<br>71 | 17<br>76 | 0.9940<br>48003 | - | . | TF=ZNF354C;class=C2<br>H2 zinc finger<br>factors;sequence=CTC<br>CAC |
| ZEB1 NM_0<br>01323671 | TF<br>BS | TF<br>BS | 17<br>43 | 17<br>48 | 0.9940<br>48003 | - | . | TF=ZNF354C;class=C2<br>H2 zinc finger<br>factors;sequence=CTC<br>CAC |
| ZEB1 NM_0<br>01323671 | TF<br>BS | TF<br>BS | 17<br>71 | 17<br>76 | 0.9940<br>48003 | - | . | TF=ZNF354C;class=C2<br>H2 zinc finger<br>factors;sequence=CTC<br>CAC |
| ZEB1 NM_0<br>01323666 | TF<br>BS | TF<br>BS | 20<br>9  | 21<br>4  | 0.9940<br>48003 | - | . | TF=ZNF354C;class=C2<br>H2 zinc finger<br>factors;sequence=CTC<br>CAC |
| ZEB1 NM_0<br>01323666 | TF<br>BS | TF<br>BS | 44<br>5  | 45<br>0  | 0.9940<br>48003 | - | . | TF=ZNF354C;class=C2<br>H2 zinc finger<br>factors;sequence=CTC<br>CAC |
| ZEB1 NM_0<br>01323642 | TF<br>BS | TF<br>BS | 15<br>3  | 15<br>8  | 0.9940<br>48003 | + | . | TF=ZNF354C;class=C2<br>H2 zinc finger<br>factors;sequence=CTC<br>CAC |
| ZEB1 NM_0<br>01174096 | TF<br>BS | TF<br>BS | 19<br>41 | 19<br>46 | 0.9940<br>48003 | - | . | TF=ZNF354C;class=C2<br>H2 zinc finger<br>factors;sequence=CTC<br>CAC |
| ZEB1 NM_0<br>30751    | TF<br>BS | TF<br>BS | 19<br>41 | 19<br>46 | 0.9940<br>48003 | - | . | TF=ZNF354C;class=C2<br>H2 zinc finger                                |

|                       |          |          |          |          |                 |   |   |                                                                      |
|-----------------------|----------|----------|----------|----------|-----------------|---|---|----------------------------------------------------------------------|
|                       |          |          |          |          |                 |   |   | factors;sequence=CTC<br>CAC                                          |
| ZEB1 NM_0<br>01323665 | TF<br>BS | TF<br>BS | 20<br>9  | 21<br>4  | 0.9940<br>48003 | - | . | TF=ZNF354C;class=C2<br>H2 zinc finger<br>factors;sequence=CTC<br>CAC |
| ZEB1 NM_0<br>01323665 | TF<br>BS | TF<br>BS | 44<br>5  | 45<br>0  | 0.9940<br>48003 | - | . | TF=ZNF354C;class=C2<br>H2 zinc finger<br>factors;sequence=CTC<br>CAC |
| ZEB1 NM_0<br>01323664 | TF<br>BS | TF<br>BS | 20<br>9  | 21<br>4  | 0.9940<br>48003 | - | . | TF=ZNF354C;class=C2<br>H2 zinc finger<br>factors;sequence=CTC<br>CAC |
| ZEB1 NM_0<br>01323664 | TF<br>BS | TF<br>BS | 44<br>5  | 45<br>0  | 0.9940<br>48003 | - | . | TF=ZNF354C;class=C2<br>H2 zinc finger<br>factors;sequence=CTC<br>CAC |
| ZEB1 NM_0<br>01323663 | TF<br>BS | TF<br>BS | 20<br>9  | 21<br>4  | 0.9940<br>48003 | - | . | TF=ZNF354C;class=C2<br>H2 zinc finger<br>factors;sequence=CTC<br>CAC |
| ZEB1 NM_0<br>01323663 | TF<br>BS | TF<br>BS | 44<br>5  | 45<br>0  | 0.9940<br>48003 | - | . | TF=ZNF354C;class=C2<br>H2 zinc finger<br>factors;sequence=CTC<br>CAC |
| ZEB1 NM_0<br>01323662 | TF<br>BS | TF<br>BS | 20<br>9  | 21<br>4  | 0.9940<br>48003 | - | . | TF=ZNF354C;class=C2<br>H2 zinc finger<br>factors;sequence=CTC<br>CAC |
| ZEB1 NM_0<br>01323662 | TF<br>BS | TF<br>BS | 44<br>5  | 45<br>0  | 0.9940<br>48003 | - | . | TF=ZNF354C;class=C2<br>H2 zinc finger<br>factors;sequence=CTC<br>CAC |
| ZEB1 NM_0<br>01323661 | TF<br>BS | TF<br>BS | 60<br>3  | 60<br>8  | 0.9940<br>48003 | - | . | TF=ZNF354C;class=C2<br>H2 zinc finger<br>factors;sequence=CTC<br>CAC |
| ZEB1 NM_0<br>01323661 | TF<br>BS | TF<br>BS | 85<br>6  | 86<br>1  | 0.9940<br>48003 | - | . | TF=ZNF354C;class=C2<br>H2 zinc finger<br>factors;sequence=CTC<br>CAC |
| ZEB1 NM_0<br>01323661 | TF<br>BS | TF<br>BS | 10<br>92 | 10<br>97 | 0.9940<br>48003 | - | . | TF=ZNF354C;class=C2<br>H2 zinc finger                                |

|                       |          |          |          |          |                 |   |   |                                                                      |
|-----------------------|----------|----------|----------|----------|-----------------|---|---|----------------------------------------------------------------------|
|                       |          |          |          |          |                 |   |   | factors;sequence=CTC<br>CAC                                          |
| ZEB1 NM_0<br>01323660 | TF<br>BS | TF<br>BS | 60<br>3  | 60<br>8  | 0.9940<br>48003 | - | . | TF=ZNF354C;class=C2<br>H2 zinc finger<br>factors;sequence=CTC<br>CAC |
| ZEB1 NM_0<br>01323660 | TF<br>BS | TF<br>BS | 85<br>6  | 86<br>1  | 0.9940<br>48003 | - | . | TF=ZNF354C;class=C2<br>H2 zinc finger<br>factors;sequence=CTC<br>CAC |
| ZEB1 NM_0<br>01323660 | TF<br>BS | TF<br>BS | 10<br>92 | 10<br>97 | 0.9940<br>48003 | - | . | TF=ZNF354C;class=C2<br>H2 zinc finger<br>factors;sequence=CTC<br>CAC |
| ZEB1 NM_0<br>01323659 | TF<br>BS | TF<br>BS | 60<br>3  | 60<br>8  | 0.9940<br>48003 | - | . | TF=ZNF354C;class=C2<br>H2 zinc finger<br>factors;sequence=CTC<br>CAC |
| ZEB1 NM_0<br>01323659 | TF<br>BS | TF<br>BS | 85<br>6  | 86<br>1  | 0.9940<br>48003 | - | . | TF=ZNF354C;class=C2<br>H2 zinc finger<br>factors;sequence=CTC<br>CAC |
| ZEB1 NM_0<br>01323659 | TF<br>BS | TF<br>BS | 10<br>92 | 10<br>97 | 0.9940<br>48003 | - | . | TF=ZNF354C;class=C2<br>H2 zinc finger<br>factors;sequence=CTC<br>CAC |
| ZEB1 NM_0<br>01174094 | TF<br>BS | TF<br>BS | 20<br>9  | 21<br>4  | 0.9940<br>48003 | - | . | TF=ZNF354C;class=C2<br>H2 zinc finger<br>factors;sequence=CTC<br>CAC |
| ZEB1 NM_0<br>01174094 | TF<br>BS | TF<br>BS | 44<br>5  | 45<br>0  | 0.9940<br>48003 | - | . | TF=ZNF354C;class=C2<br>H2 zinc finger<br>factors;sequence=CTC<br>CAC |
| ZEB1 NM_0<br>01323661 | TF<br>BS | TF<br>BS | 19<br>97 | 20<br>07 | 0.9939<br>47523 | - | . | TF=HOXD13;class=Ho<br>meo domain<br>factors;sequence=GGC<br>AATAAAAC |
| ZEB1 NM_0<br>01323660 | TF<br>BS | TF<br>BS | 19<br>97 | 20<br>07 | 0.9939<br>47523 | - | . | TF=HOXD13;class=Ho<br>meo domain<br>factors;sequence=GGC<br>AATAAAAC |
| ZEB1 NM_0<br>01323659 | TF<br>BS | TF<br>BS | 19<br>97 | 20<br>07 | 0.9939<br>47523 | - | . | TF=HOXD13;class=Ho<br>meo domain                                     |

|                   |          |          |          |          |                 |   |   |                                                                                                               |
|-------------------|----------|----------|----------|----------|-----------------|---|---|---------------------------------------------------------------------------------------------------------------|
| ZEB1 NM_001128128 | TF<br>BS | TF<br>BS | 29<br>6  | 30<br>8  | 0.9935<br>09177 | + | . | factors;sequence=GGC<br>AATAAAAC<br>TF=OVOL2;class=C2H<br>2 zinc finger<br>factors;sequence=GAA<br>CCGTTATGTC |
| ZEB1 NM_001323658 | TF<br>BS | TF<br>BS | 17<br>29 | 17<br>41 | 0.9935<br>09177 | + | . | TF=OVOL2;class=C2H<br>2 zinc finger<br>factors;sequence=GAA<br>CCGTTATGTC                                     |
| ZEB1 NM_001323657 | TF<br>BS | TF<br>BS | 17<br>29 | 17<br>41 | 0.9935<br>09177 | + | . | TF=OVOL2;class=C2H<br>2 zinc finger<br>factors;sequence=GAA<br>CCGTTATGTC                                     |
| ZEB1 NM_001323656 | TF<br>BS | TF<br>BS | 17<br>29 | 17<br>41 | 0.9935<br>09177 | + | . | TF=OVOL2;class=C2H<br>2 zinc finger<br>factors;sequence=GAA<br>CCGTTATGTC                                     |
| ZEB1 NM_001323678 | TF<br>BS | TF<br>BS | 29<br>6  | 30<br>8  | 0.9935<br>09177 | + | . | TF=OVOL2;class=C2H<br>2 zinc finger<br>factors;sequence=GAA<br>CCGTTATGTC                                     |
| ZEB1 NM_001323666 | TF<br>BS | TF<br>BS | 29<br>6  | 30<br>8  | 0.9935<br>09177 | + | . | TF=OVOL2;class=C2H<br>2 zinc finger<br>factors;sequence=GAA<br>CCGTTATGTC                                     |
| ZEB1 NM_001323665 | TF<br>BS | TF<br>BS | 29<br>6  | 30<br>8  | 0.9935<br>09177 | + | . | TF=OVOL2;class=C2H<br>2 zinc finger<br>factors;sequence=GAA<br>CCGTTATGTC                                     |
| ZEB1 NM_001323664 | TF<br>BS | TF<br>BS | 29<br>6  | 30<br>8  | 0.9935<br>09177 | + | . | TF=OVOL2;class=C2H<br>2 zinc finger<br>factors;sequence=GAA<br>CCGTTATGTC                                     |
| ZEB1 NM_001323663 | TF<br>BS | TF<br>BS | 29<br>6  | 30<br>8  | 0.9935<br>09177 | + | . | TF=OVOL2;class=C2H<br>2 zinc finger<br>factors;sequence=GAA<br>CCGTTATGTC                                     |
| ZEB1 NM_001323662 | TF<br>BS | TF<br>BS | 29<br>6  | 30<br>8  | 0.9935<br>09177 | + | . | TF=OVOL2;class=C2H<br>2 zinc finger<br>factors;sequence=GAA<br>CCGTTATGTC                                     |
| ZEB1 NM_001323661 | TF<br>BS | TF<br>BS | 94<br>3  | 95<br>5  | 0.9935<br>09177 | + | . | TF=OVOL2;class=C2H<br>2 zinc finger                                                                           |

|                  |          |          |          |          |                 |   |   |                                                                                                                         |
|------------------|----------|----------|----------|----------|-----------------|---|---|-------------------------------------------------------------------------------------------------------------------------|
| ZEB1 NM_01323660 | TF<br>BS | TF<br>BS | 94<br>3  | 95<br>5  | 0.9935<br>09177 | + | . | factors;sequence=GAA<br>CCGTTATGTC<br>TF=OVOL2;class=C2H<br>2 zinc finger                                               |
| ZEB1 NM_01323659 | TF<br>BS | TF<br>BS | 94<br>3  | 95<br>5  | 0.9935<br>09177 | + | . | factors;sequence=GAA<br>CCGTTATGTC<br>TF=OVOL2;class=C2H<br>2 zinc finger                                               |
| ZEB1 NM_01174094 | TF<br>BS | TF<br>BS | 29<br>6  | 30<br>8  | 0.9935<br>09177 | + | . | factors;sequence=GAA<br>CCGTTATGTC<br>TF=OVOL2;class=C2H<br>2 zinc finger                                               |
| ZEB1 NM_01323673 | TF<br>BS | TF<br>BS | 19<br>59 | 19<br>68 | 0.9929<br>58964 | - | . | factors;sequence=GAA<br>CCGTTATGTC<br>TF=MXI1;class=Basic<br>helix-loop-helix factors<br>(bHLH);sequence=CAC<br>ACATGTC |
| ZEB1 NM_01323677 | TF<br>BS | TF<br>BS | 19<br>59 | 19<br>68 | 0.9929<br>58964 | - | . | TF=MXI1;class=Basic<br>helix-loop-helix factors<br>(bHLH);sequence=CAC<br>ACATGTC                                       |
| ZEB1 NM_01323676 | TF<br>BS | TF<br>BS | 19<br>59 | 19<br>68 | 0.9929<br>58964 | - | . | TF=MXI1;class=Basic<br>helix-loop-helix factors<br>(bHLH);sequence=CAC<br>ACATGTC                                       |
| ZEB1 NM_01323675 | TF<br>BS | TF<br>BS | 19<br>59 | 19<br>68 | 0.9929<br>58964 | - | . | TF=MXI1;class=Basic<br>helix-loop-helix factors<br>(bHLH);sequence=CAC<br>ACATGTC                                       |
| ZEB1 NM_01323672 | TF<br>BS | TF<br>BS | 19<br>59 | 19<br>68 | 0.9929<br>58964 | - | . | TF=MXI1;class=Basic<br>helix-loop-helix factors<br>(bHLH);sequence=CAC<br>ACATGTC                                       |
| ZEB1 NM_01323671 | TF<br>BS | TF<br>BS | 19<br>59 | 19<br>68 | 0.9929<br>58964 | - | . | TF=MXI1;class=Basic<br>helix-loop-helix factors<br>(bHLH);sequence=CAC<br>ACATGTC                                       |
| ZEB1 NM_01323638 | TF<br>BS | TF<br>BS | 39<br>5  | 40<br>2  | 0.9928<br>97745 | + | . | TF=HOXB6;class=Ho<br>meo domain<br>factors;sequence=TTA<br>ATGAC                                                        |
| ZEB1 NM_01323643 | TF<br>BS | TF<br>BS | 39<br>5  | 40<br>2  | 0.9928<br>97745 | + | . | TF=HOXB6;class=Ho<br>meo domain                                                                                         |

|                       |          |          |          |          |                 |   |   |                                                                                   |
|-----------------------|----------|----------|----------|----------|-----------------|---|---|-----------------------------------------------------------------------------------|
|                       |          |          |          |          |                 |   |   | factors;sequence=TTA<br>ATGAC                                                     |
| ZEB1 NM_0<br>01323673 | TF<br>BS | TF<br>BS | 16<br>67 | 16<br>74 | 0.9928<br>87021 | - | . | TF=HOXB4;class=Ho<br>meo domain<br>factors;sequence=ATA<br>ATTAA                  |
| ZEB1 NM_0<br>01323677 | TF<br>BS | TF<br>BS | 16<br>67 | 16<br>74 | 0.9928<br>87021 | - | . | TF=HOXB4;class=Ho<br>meo domain<br>factors;sequence=ATA<br>ATTAA                  |
| ZEB1 NM_0<br>01323676 | TF<br>BS | TF<br>BS | 16<br>67 | 16<br>74 | 0.9928<br>87021 | - | . | TF=HOXB4;class=Ho<br>meo domain<br>factors;sequence=ATA<br>ATTAA                  |
| ZEB1 NM_0<br>01323675 | TF<br>BS | TF<br>BS | 16<br>67 | 16<br>74 | 0.9928<br>87021 | - | . | TF=HOXB4;class=Ho<br>meo domain<br>factors;sequence=ATA<br>ATTAA                  |
| ZEB1 NM_0<br>01323672 | TF<br>BS | TF<br>BS | 16<br>67 | 16<br>74 | 0.9928<br>87021 | - | . | TF=HOXB4;class=Ho<br>meo domain<br>factors;sequence=ATA<br>ATTAA                  |
| ZEB1 NM_0<br>01323671 | TF<br>BS | TF<br>BS | 16<br>67 | 16<br>74 | 0.9928<br>87021 | - | . | TF=HOXB4;class=Ho<br>meo domain<br>factors;sequence=ATA<br>ATTAA                  |
| ZEB1 NM_0<br>01128128 | TF<br>BS | TF<br>BS | 14<br>49 | 14<br>58 | 0.9925<br>53464 | - | . | TF=MXI1;class=Basic<br>helix-loop-helix factors<br>(bHLH);sequence=ACC<br>ACATGTT |
| ZEB1 NM_0<br>01323673 | TF<br>BS | TF<br>BS | 99<br>0  | 99<br>9  | 0.9925<br>53464 | - | . | TF=MXI1;class=Basic<br>helix-loop-helix factors<br>(bHLH);sequence=ACC<br>ACATGTT |
| ZEB1 NM_0<br>01323678 | TF<br>BS | TF<br>BS | 14<br>49 | 14<br>58 | 0.9925<br>53464 | - | . | TF=MXI1;class=Basic<br>helix-loop-helix factors<br>(bHLH);sequence=ACC<br>ACATGTT |
| ZEB1 NM_0<br>01323677 | TF<br>BS | TF<br>BS | 99<br>0  | 99<br>9  | 0.9925<br>53464 | - | . | TF=MXI1;class=Basic<br>helix-loop-helix factors<br>(bHLH);sequence=ACC<br>ACATGTT |
| ZEB1 NM_0<br>01323676 | TF<br>BS | TF<br>BS | 99<br>0  | 99<br>9  | 0.9925<br>53464 | - | . | TF=MXI1;class=Basic<br>helix-loop-helix factors                                   |

|                  |          |          |          |          |                 |   |   |                                                                                                                     |
|------------------|----------|----------|----------|----------|-----------------|---|---|---------------------------------------------------------------------------------------------------------------------|
| ZEB1 NM_01323675 | TF<br>BS | TF<br>BS | 99<br>0  | 99<br>9  | 0.9925<br>53464 | - | . | (bHLH);sequence=ACC<br>ACATGTT<br>TF=MXI1;class=Basic<br>helix-loop-helix factors<br>(bHLH);sequence=ACC<br>ACATGTT |
| ZEB1 NM_01323672 | TF<br>BS | TF<br>BS | 99<br>0  | 99<br>9  | 0.9925<br>53464 | - | . | TF=MXI1;class=Basic<br>helix-loop-helix factors<br>(bHLH);sequence=ACC<br>ACATGTT                                   |
| ZEB1 NM_01323671 | TF<br>BS | TF<br>BS | 99<br>0  | 99<br>9  | 0.9925<br>53464 | - | . | TF=MXI1;class=Basic<br>helix-loop-helix factors<br>(bHLH);sequence=ACC<br>ACATGTT                                   |
| ZEB1 NM_01323666 | TF<br>BS | TF<br>BS | 14<br>49 | 14<br>58 | 0.9925<br>53464 | - | . | TF=MXI1;class=Basic<br>helix-loop-helix factors<br>(bHLH);sequence=ACC<br>ACATGTT                                   |
| ZEB1 NM_01323665 | TF<br>BS | TF<br>BS | 14<br>49 | 14<br>58 | 0.9925<br>53464 | - | . | TF=MXI1;class=Basic<br>helix-loop-helix factors<br>(bHLH);sequence=ACC<br>ACATGTT                                   |
| ZEB1 NM_01323664 | TF<br>BS | TF<br>BS | 14<br>49 | 14<br>58 | 0.9925<br>53464 | - | . | TF=MXI1;class=Basic<br>helix-loop-helix factors<br>(bHLH);sequence=ACC<br>ACATGTT                                   |
| ZEB1 NM_01323663 | TF<br>BS | TF<br>BS | 14<br>49 | 14<br>58 | 0.9925<br>53464 | - | . | TF=MXI1;class=Basic<br>helix-loop-helix factors<br>(bHLH);sequence=ACC<br>ACATGTT                                   |
| ZEB1 NM_01323662 | TF<br>BS | TF<br>BS | 14<br>49 | 14<br>58 | 0.9925<br>53464 | - | . | TF=MXI1;class=Basic<br>helix-loop-helix factors<br>(bHLH);sequence=ACC<br>ACATGTT                                   |
| ZEB1 NM_01174094 | TF<br>BS | TF<br>BS | 14<br>49 | 14<br>58 | 0.9925<br>53464 | - | . | TF=MXI1;class=Basic<br>helix-loop-helix factors<br>(bHLH);sequence=ACC<br>ACATGTT                                   |
| ZEB1 NM_01323647 | TF<br>BS | TF<br>BS | 85       | 93       | 0.9923<br>68199 | + | . | TF=NR2C1;class=Nucl<br>ear receptors with C4<br>zinc<br>fingers;sequence=TGG<br>GGTCAA                              |
| ZEB1 NM_0        | TF       | TF       | 48       | 49       | 0.9923          | + | . | TF=NR2C1;class=Nucl                                                                                                 |



|                       |          |          |         |         |                 |   |   |                                                                                        |
|-----------------------|----------|----------|---------|---------|-----------------|---|---|----------------------------------------------------------------------------------------|
| 01323641              | BS       | BS       | 3       | 1       | 68199           |   |   | ear receptors with C4<br>zinc<br>fingers;sequence=TGG<br>GGTCAA                        |
| ZEB1 NM_0<br>01323638 | TF<br>BS | TF<br>BS | 88<br>4 | 89<br>2 | 0.9923<br>68199 | + | . | TF=NR2C1;class=Nucl<br>ear receptors with C4<br>zinc<br>fingers;sequence=TGG<br>GGTCAA |
| ZEB1 NM_0<br>01323644 | TF<br>BS | TF<br>BS | 48<br>3 | 49<br>1 | 0.9923<br>68199 | + | . | TF=NR2C1;class=Nucl<br>ear receptors with C4<br>zinc<br>fingers;sequence=TGG<br>GGTCAA |
| ZEB1 NM_0<br>01323643 | TF<br>BS | TF<br>BS | 88<br>4 | 89<br>2 | 0.9923<br>68199 | + | . | TF=NR2C1;class=Nucl<br>ear receptors with C4<br>zinc<br>fingers;sequence=TGG<br>GGTCAA |
| ZEB1 NM_0<br>01323674 | TF<br>BS | TF<br>BS | 85      | 93      | 0.9923<br>68199 | + | . | TF=NR2C1;class=Nucl<br>ear receptors with C4<br>zinc<br>fingers;sequence=TGG<br>GGTCAA |
| ZEB1 NM_0<br>01323650 | TF<br>BS | TF<br>BS | 85      | 93      | 0.9923<br>68199 | + | . | TF=NR2C1;class=Nucl<br>ear receptors with C4<br>zinc<br>fingers;sequence=TGG<br>GGTCAA |
| ZEB1 NM_0<br>01323648 | TF<br>BS | TF<br>BS | 85      | 93      | 0.9923<br>68199 | + | . | TF=NR2C1;class=Nucl<br>ear receptors with C4<br>zinc<br>fingers;sequence=TGG<br>GGTCAA |
| ZEB1 NM_0<br>01174095 | TF<br>BS | TF<br>BS | 85      | 93      | 0.9923<br>68199 | + | . | TF=NR2C1;class=Nucl<br>ear receptors with C4<br>zinc<br>fingers;sequence=TGG<br>GGTCAA |
| ZEB1 NM_0<br>01323646 | TF<br>BS | TF<br>BS | 48<br>3 | 49<br>1 | 0.9923<br>68199 | + | . | TF=NR2C1;class=Nucl<br>ear receptors with C4<br>zinc<br>fingers;sequence=TGG<br>GGTCAA |

|                  |          |          |         |         |                 |   |   |                                                                         |
|------------------|----------|----------|---------|---------|-----------------|---|---|-------------------------------------------------------------------------|
| ZEB1 NM_01323645 | TF<br>BS | TF<br>BS | 48<br>3 | 49<br>1 | 0.9923<br>68199 | + | . | TF=NR2C1;class=Nuclear receptors with C4 zinc fingers;sequence=TGGGTCAA |
| ZEB1 NM_01174093 | TF<br>BS | TF<br>BS | 85      | 93      | 0.9923<br>68199 | + | . | TF=NR2C1;class=Nuclear receptors with C4 zinc fingers;sequence=TGGGTCAA |
| ZEB1 NM_01323655 | TF<br>BS | TF<br>BS | 85      | 93      | 0.9923<br>68199 | + | . | TF=NR2C1;class=Nuclear receptors with C4 zinc fingers;sequence=TGGGTCAA |
| ZEB1 NM_01323654 | TF<br>BS | TF<br>BS | 85      | 93      | 0.9923<br>68199 | + | . | TF=NR2C1;class=Nuclear receptors with C4 zinc fingers;sequence=TGGGTCAA |
| ZEB1 NM_01323653 | TF<br>BS | TF<br>BS | 85      | 93      | 0.9923<br>68199 | + | . | TF=NR2C1;class=Nuclear receptors with C4 zinc fingers;sequence=TGGGTCAA |
| ZEB1 NM_01323652 | TF<br>BS | TF<br>BS | 85      | 93      | 0.9923<br>68199 | + | . | TF=NR2C1;class=Nuclear receptors with C4 zinc fingers;sequence=TGGGTCAA |
| ZEB1 NM_01323651 | TF<br>BS | TF<br>BS | 85      | 93      | 0.9923<br>68199 | + | . | TF=NR2C1;class=Nuclear receptors with C4 zinc fingers;sequence=TGGGTCAA |
| ZEB1 NM_01323649 | TF<br>BS | TF<br>BS | 85      | 93      | 0.9923<br>68199 | + | . | TF=NR2C1;class=Nuclear receptors with C4 zinc fingers;sequence=TGGGTCAA |
| ZEB1 NM_01323642 | TF<br>BS | TF<br>BS | 48<br>3 | 49<br>1 | 0.9923<br>68199 | + | . | TF=NR2C1;class=Nuclear receptors with C4 zinc fingers;sequence=TGG      |

|                  |          |          |          |          |                 |   |   |                                                                                        |
|------------------|----------|----------|----------|----------|-----------------|---|---|----------------------------------------------------------------------------------------|
|                  |          |          |          |          |                 |   |   | GGTCAA                                                                                 |
| ZEB1 NM_01174096 | TF<br>BS | TF<br>BS | 85       | 93       | 0.9923<br>68199 | + | . | TF=NR2C1;class=Nucl<br>ear receptors with C4<br>zinc<br>fingers;sequence=TGG<br>GGTCAA |
| ZEB1 NM_030751   | TF<br>BS | TF<br>BS | 85       | 93       | 0.9923<br>68199 | + | . | TF=NR2C1;class=Nucl<br>ear receptors with C4<br>zinc<br>fingers;sequence=TGG<br>GGTCAA |
| ZEB1 NM_01128128 | TF<br>BS | TF<br>BS | 29       | 36       | 0.9920<br>88812 | - | . | TF=RHOXF1;class=Ho<br>meo domain<br>factors;sequence=ATG<br>ATCCT                      |
| ZEB1 NM_01323658 | TF<br>BS | TF<br>BS | 14<br>62 | 14<br>69 | 0.9920<br>88812 | - | . | TF=RHOXF1;class=Ho<br>meo domain<br>factors;sequence=ATG<br>ATCCT                      |
| ZEB1 NM_01323657 | TF<br>BS | TF<br>BS | 14<br>62 | 14<br>69 | 0.9920<br>88812 | - | . | TF=RHOXF1;class=Ho<br>meo domain<br>factors;sequence=ATG<br>ATCCT                      |
| ZEB1 NM_01323656 | TF<br>BS | TF<br>BS | 14<br>62 | 14<br>69 | 0.9920<br>88812 | - | . | TF=RHOXF1;class=Ho<br>meo domain<br>factors;sequence=ATG<br>ATCCT                      |
| ZEB1 NM_01323678 | TF<br>BS | TF<br>BS | 29       | 36       | 0.9920<br>88812 | - | . | TF=RHOXF1;class=Ho<br>meo domain<br>factors;sequence=ATG<br>ATCCT                      |
| ZEB1 NM_01323666 | TF<br>BS | TF<br>BS | 29       | 36       | 0.9920<br>88812 | - | . | TF=RHOXF1;class=Ho<br>meo domain<br>factors;sequence=ATG<br>ATCCT                      |
| ZEB1 NM_01323665 | TF<br>BS | TF<br>BS | 29       | 36       | 0.9920<br>88812 | - | . | TF=RHOXF1;class=Ho<br>meo domain<br>factors;sequence=ATG<br>ATCCT                      |
| ZEB1 NM_01323664 | TF<br>BS | TF<br>BS | 29       | 36       | 0.9920<br>88812 | - | . | TF=RHOXF1;class=Ho<br>meo domain<br>factors;sequence=ATG<br>ATCCT                      |
| ZEB1 NM_0        | TF       | TF       | 29       | 36       | 0.9920          | - | . | TF=RHOXF1;class=Ho                                                                     |

|                       |          |          |          |          |                 |   |   |                                                                     |
|-----------------------|----------|----------|----------|----------|-----------------|---|---|---------------------------------------------------------------------|
| 01323663              | BS       | BS       |          |          | 88812           |   |   | meo domain<br>factors;sequence=ATG<br>ATCCT                         |
| ZEB1 NM_0<br>01323662 | TF<br>BS | TF<br>BS | 29<br>6  | 36<br>3  | 0.9920<br>88812 | - | . | TF=RHOXF1;class=Ho<br>meo domain<br>factors;sequence=ATG<br>ATCCT   |
| ZEB1 NM_0<br>01323661 | TF<br>BS | TF<br>BS | 67<br>6  | 68<br>3  | 0.9920<br>88812 | - | . | TF=RHOXF1;class=Ho<br>meo domain<br>factors;sequence=ATG<br>ATCCT   |
| ZEB1 NM_0<br>01323660 | TF<br>BS | TF<br>BS | 67<br>6  | 68<br>3  | 0.9920<br>88812 | - | . | TF=RHOXF1;class=Ho<br>meo domain<br>factors;sequence=ATG<br>ATCCT   |
| ZEB1 NM_0<br>01323659 | TF<br>BS | TF<br>BS | 67<br>6  | 68<br>3  | 0.9920<br>88812 | - | . | TF=RHOXF1;class=Ho<br>meo domain<br>factors;sequence=ATG<br>ATCCT   |
| ZEB1 NM_0<br>01174094 | TF<br>BS | TF<br>BS | 29<br>6  | 36<br>3  | 0.9920<br>88812 | - | . | TF=RHOXF1;class=Ho<br>meo domain<br>factors;sequence=ATG<br>ATCCT   |
| ZEB1 NM_0<br>01128128 | TF<br>BS | TF<br>BS | 19<br>97 | 20<br>08 | 0.9920<br>60007 | - | . | TF=CDX2;class=Home<br>o domain<br>factors;sequence=AGG<br>CAATAAAAA |
| ZEB1 NM_0<br>01323678 | TF<br>BS | TF<br>BS | 19<br>97 | 20<br>08 | 0.9920<br>60007 | - | . | TF=CDX2;class=Home<br>o domain<br>factors;sequence=AGG<br>CAATAAAAA |
| ZEB1 NM_0<br>01323666 | TF<br>BS | TF<br>BS | 19<br>97 | 20<br>08 | 0.9920<br>60007 | - | . | TF=CDX2;class=Home<br>o domain<br>factors;sequence=AGG<br>CAATAAAAA |
| ZEB1 NM_0<br>01323665 | TF<br>BS | TF<br>BS | 19<br>97 | 20<br>08 | 0.9920<br>60007 | - | . | TF=CDX2;class=Home<br>o domain<br>factors;sequence=AGG<br>CAATAAAAA |
| ZEB1 NM_0<br>01323664 | TF<br>BS | TF<br>BS | 19<br>97 | 20<br>08 | 0.9920<br>60007 | - | . | TF=CDX2;class=Home<br>o domain<br>factors;sequence=AGG<br>CAATAAAAA |
| ZEB1 NM_0             | TF       | TF       | 19       | 20       | 0.9920          | - | . | TF=CDX2;class=Home                                                  |

|                       |          |          |          |          |                 |   |   |                                                                                              |
|-----------------------|----------|----------|----------|----------|-----------------|---|---|----------------------------------------------------------------------------------------------|
| 01323663              | BS       | BS       | 97       | 08       | 60007           |   |   | o domain<br>factors;sequence=AGG<br>CAATAAAAA                                                |
| ZEB1 NM_0<br>01323662 | TF<br>BS | TF<br>BS | 19<br>97 | 20<br>08 | 0.9920<br>60007 | - | . | TF=CDX2;class=Home<br>o domain<br>factors;sequence=AGG<br>CAATAAAAA                          |
| ZEB1 NM_0<br>01174094 | TF<br>BS | TF<br>BS | 19<br>97 | 20<br>08 | 0.9920<br>60007 | - | . | TF=CDX2;class=Home<br>o domain<br>factors;sequence=AGG<br>CAATAAAAA                          |
| ZEB1 NM_0<br>01323641 | TF<br>BS | TF<br>BS | 86       | 93       | 0.9919<br>57077 | + | . | TF=NR2C2(var.2);class<br>=Nuclear receptors with<br>C4 zinc<br>fingers;sequence=AGG<br>GTCAG |
| ZEB1 NM_0<br>01323638 | TF<br>BS | TF<br>BS | 48<br>7  | 49<br>4  | 0.9919<br>57077 | + | . | TF=NR2C2(var.2);class<br>=Nuclear receptors with<br>C4 zinc<br>fingers;sequence=AGG<br>GTCAG |
| ZEB1 NM_0<br>01323644 | TF<br>BS | TF<br>BS | 86       | 93       | 0.9919<br>57077 | + | . | TF=NR2C2(var.2);class<br>=Nuclear receptors with<br>C4 zinc<br>fingers;sequence=AGG<br>GTCAG |
| ZEB1 NM_0<br>01323643 | TF<br>BS | TF<br>BS | 48<br>7  | 49<br>4  | 0.9919<br>57077 | + | . | TF=NR2C2(var.2);class<br>=Nuclear receptors with<br>C4 zinc<br>fingers;sequence=AGG<br>GTCAG |
| ZEB1 NM_0<br>01323646 | TF<br>BS | TF<br>BS | 86       | 93       | 0.9919<br>57077 | + | . | TF=NR2C2(var.2);class<br>=Nuclear receptors with<br>C4 zinc<br>fingers;sequence=AGG<br>GTCAG |
| ZEB1 NM_0<br>01323645 | TF<br>BS | TF<br>BS | 86       | 93       | 0.9919<br>57077 | + | . | TF=NR2C2(var.2);class<br>=Nuclear receptors with<br>C4 zinc<br>fingers;sequence=AGG<br>GTCAG |
| ZEB1 NM_0<br>01323642 | TF<br>BS | TF<br>BS | 86       | 93       | 0.9919<br>57077 | + | . | TF=NR2C2(var.2);class<br>=Nuclear receptors with<br>C4 zinc                                  |

|                       |          |          |          |          |                |   |   |                                                                    |
|-----------------------|----------|----------|----------|----------|----------------|---|---|--------------------------------------------------------------------|
|                       |          |          |          |          |                |   |   | fingers;sequence=AGG<br>GTCAG                                      |
| ZEB1 NM_0<br>01323647 | TF<br>BS | TF<br>BS | 19<br>97 | 20<br>07 | 0.9918<br>7081 | - | . | TF=CDX4;class=Home<br>o domain<br>factors;sequence=GGC<br>AATAAAAT |
| ZEB1 NM_0<br>01323674 | TF<br>BS | TF<br>BS | 19<br>97 | 20<br>07 | 0.9918<br>7081 | - | . | TF=CDX4;class=Home<br>o domain<br>factors;sequence=GGC<br>AATAAAAT |
| ZEB1 NM_0<br>01323650 | TF<br>BS | TF<br>BS | 19<br>97 | 20<br>07 | 0.9918<br>7081 | - | . | TF=CDX4;class=Home<br>o domain<br>factors;sequence=GGC<br>AATAAAAT |
| ZEB1 NM_0<br>01323648 | TF<br>BS | TF<br>BS | 19<br>97 | 20<br>07 | 0.9918<br>7081 | - | . | TF=CDX4;class=Home<br>o domain<br>factors;sequence=GGC<br>AATAAAAT |
| ZEB1 NM_0<br>01174095 | TF<br>BS | TF<br>BS | 19<br>97 | 20<br>07 | 0.9918<br>7081 | - | . | TF=CDX4;class=Home<br>o domain<br>factors;sequence=GGC<br>AATAAAAT |
| ZEB1 NM_0<br>01174093 | TF<br>BS | TF<br>BS | 19<br>97 | 20<br>07 | 0.9918<br>7081 | - | . | TF=CDX4;class=Home<br>o domain<br>factors;sequence=GGC<br>AATAAAAT |
| ZEB1 NM_0<br>01323655 | TF<br>BS | TF<br>BS | 19<br>97 | 20<br>07 | 0.9918<br>7081 | - | . | TF=CDX4;class=Home<br>o domain<br>factors;sequence=GGC<br>AATAAAAT |
| ZEB1 NM_0<br>01323654 | TF<br>BS | TF<br>BS | 19<br>97 | 20<br>07 | 0.9918<br>7081 | - | . | TF=CDX4;class=Home<br>o domain<br>factors;sequence=GGC<br>AATAAAAT |
| ZEB1 NM_0<br>01323653 | TF<br>BS | TF<br>BS | 19<br>97 | 20<br>07 | 0.9918<br>7081 | - | . | TF=CDX4;class=Home<br>o domain<br>factors;sequence=GGC<br>AATAAAAT |
| ZEB1 NM_0<br>01323652 | TF<br>BS | TF<br>BS | 19<br>97 | 20<br>07 | 0.9918<br>7081 | - | . | TF=CDX4;class=Home<br>o domain<br>factors;sequence=GGC<br>AATAAAAT |
| ZEB1 NM_0<br>01323651 | TF<br>BS | TF<br>BS | 19<br>97 | 20<br>07 | 0.9918<br>7081 | - | . | TF=CDX4;class=Home<br>o domain                                     |

|                  |          |          |          |          |                 |   |   |                                                                                                                                                                                                                |
|------------------|----------|----------|----------|----------|-----------------|---|---|----------------------------------------------------------------------------------------------------------------------------------------------------------------------------------------------------------------|
| ZEB1 NM_01323649 | TF<br>BS | TF<br>BS | 19<br>97 | 20<br>07 | 0.9918<br>7081  | - | . | factors;sequence=GGC<br>AATAAAAT<br>TF=CDX4;class=Home<br>o domain<br>factors;sequence=GGC<br>AATAAAAT<br>TF=CDX4;class=Home<br>o domain<br>factors;sequence=GGC<br>AATAAAAT<br>TF=CDX4;class=Home<br>o domain |
| ZEB1 NM_01174096 | TF<br>BS | TF<br>BS | 19<br>97 | 20<br>07 | 0.9918<br>7081  | - | . | factors;sequence=GGC<br>AATAAAAT<br>TF=CDX4;class=Home<br>o domain<br>factors;sequence=GGC<br>AATAAAAT<br>TF=CDX4;class=Home<br>o domain                                                                       |
| ZEB1 NM_030751   | TF<br>BS | TF<br>BS | 19<br>97 | 20<br>07 | 0.9918<br>7081  | - | . | factors;sequence=GGC<br>AATAAAAT<br>TF=CDX4;class=Home<br>o domain<br>factors;sequence=GGC<br>AATAAAAT<br>TF=CDX4;class=Home<br>o domain                                                                       |
| ZEB1 NM_01323647 | TF<br>BS | TF<br>BS | 26<br>6  | 27<br>3  | 0.9915<br>28411 | + | . | factors;sequence=GGC<br>AATAAAAT<br>TF=HOXA4;class=Ho<br>meo domain<br>factors;sequence=ATC<br>ATTAA<br>TF=HOXA4;class=Ho<br>meo domain<br>factors;sequence=ATC<br>ATTAA                                       |
| ZEB1 NM_01323641 | TF<br>BS | TF<br>BS | 66<br>4  | 67<br>1  | 0.9915<br>28411 | + | . | factors;sequence=ATC<br>ATTAA<br>TF=HOXA4;class=Ho<br>meo domain<br>factors;sequence=ATC<br>ATTAA<br>TF=HOXA4;class=Ho<br>meo domain                                                                           |
| ZEB1 NM_01323638 | TF<br>BS | TF<br>BS | 10<br>65 | 10<br>72 | 0.9915<br>28411 | + | . | factors;sequence=ATC<br>ATTAA<br>TF=HOXA4;class=Ho<br>meo domain<br>factors;sequence=ATC<br>ATTAA<br>TF=HOXA4;class=Ho<br>meo domain                                                                           |
| ZEB1 NM_01323644 | TF<br>BS | TF<br>BS | 66<br>4  | 67<br>1  | 0.9915<br>28411 | + | . | factors;sequence=ATC<br>ATTAA<br>TF=HOXA4;class=Ho<br>meo domain<br>factors;sequence=ATC<br>ATTAA<br>TF=HOXA4;class=Ho<br>meo domain                                                                           |
| ZEB1 NM_01323643 | TF<br>BS | TF<br>BS | 10<br>65 | 10<br>72 | 0.9915<br>28411 | + | . | factors;sequence=ATC<br>ATTAA<br>TF=HOXA4;class=Ho<br>meo domain<br>factors;sequence=ATC<br>ATTAA<br>TF=HOXA4;class=Ho<br>meo domain                                                                           |
| ZEB1 NM_01323674 | TF<br>BS | TF<br>BS | 26<br>6  | 27<br>3  | 0.9915<br>28411 | + | . | factors;sequence=ATC<br>ATTAA<br>TF=HOXA4;class=Ho<br>meo domain<br>factors;sequence=ATC<br>ATTAA<br>TF=HOXA4;class=Ho<br>meo domain                                                                           |
| ZEB1 NM_01323673 | TF<br>BS | TF<br>BS | 16<br>40 | 16<br>47 | 0.9915<br>28411 | + | . | factors;sequence=ATC<br>ATTAA<br>TF=HOXA4;class=Ho<br>meo domain<br>factors;sequence=ATC<br>ATTAA<br>TF=HOXA4;class=Ho<br>meo domain                                                                           |
| ZEB1 NM_01323650 | TF<br>BS | TF<br>BS | 26<br>6  | 27<br>3  | 0.9915<br>28411 | + | . | factors;sequence=ATC<br>ATTAA<br>TF=HOXA4;class=Ho<br>meo domain                                                                                                                                               |

|                       |          |          |          |          |                 |   |   |                                                                  |
|-----------------------|----------|----------|----------|----------|-----------------|---|---|------------------------------------------------------------------|
|                       |          |          |          |          |                 |   |   | factors;sequence=ATC<br>ATTAA                                    |
| ZEB1 NM_0<br>01323648 | TF<br>BS | TF<br>BS | 26<br>6  | 27<br>3  | 0.9915<br>28411 | + | . | TF=HOXA4;class=Ho<br>meo domain<br>factors;sequence=ATC<br>ATTAA |
| ZEB1 NM_0<br>01174095 | TF<br>BS | TF<br>BS | 26<br>6  | 27<br>3  | 0.9915<br>28411 | + | . | TF=HOXA4;class=Ho<br>meo domain<br>factors;sequence=ATC<br>ATTAA |
| ZEB1 NM_0<br>01323646 | TF<br>BS | TF<br>BS | 66<br>4  | 67<br>1  | 0.9915<br>28411 | + | . | TF=HOXA4;class=Ho<br>meo domain<br>factors;sequence=ATC<br>ATTAA |
| ZEB1 NM_0<br>01323645 | TF<br>BS | TF<br>BS | 66<br>4  | 67<br>1  | 0.9915<br>28411 | + | . | TF=HOXA4;class=Ho<br>meo domain<br>factors;sequence=ATC<br>ATTAA |
| ZEB1 NM_0<br>01174093 | TF<br>BS | TF<br>BS | 26<br>6  | 27<br>3  | 0.9915<br>28411 | + | . | TF=HOXA4;class=Ho<br>meo domain<br>factors;sequence=ATC<br>ATTAA |
| ZEB1 NM_0<br>01323655 | TF<br>BS | TF<br>BS | 26<br>6  | 27<br>3  | 0.9915<br>28411 | + | . | TF=HOXA4;class=Ho<br>meo domain<br>factors;sequence=ATC<br>ATTAA |
| ZEB1 NM_0<br>01323654 | TF<br>BS | TF<br>BS | 26<br>6  | 27<br>3  | 0.9915<br>28411 | + | . | TF=HOXA4;class=Ho<br>meo domain<br>factors;sequence=ATC<br>ATTAA |
| ZEB1 NM_0<br>01323653 | TF<br>BS | TF<br>BS | 26<br>6  | 27<br>3  | 0.9915<br>28411 | + | . | TF=HOXA4;class=Ho<br>meo domain<br>factors;sequence=ATC<br>ATTAA |
| ZEB1 NM_0<br>01323652 | TF<br>BS | TF<br>BS | 26<br>6  | 27<br>3  | 0.9915<br>28411 | + | . | TF=HOXA4;class=Ho<br>meo domain<br>factors;sequence=ATC<br>ATTAA |
| ZEB1 NM_0<br>01323651 | TF<br>BS | TF<br>BS | 26<br>6  | 27<br>3  | 0.9915<br>28411 | + | . | TF=HOXA4;class=Ho<br>meo domain<br>factors;sequence=ATC<br>ATTAA |
| ZEB1 NM_0<br>01323677 | TF<br>BS | TF<br>BS | 16<br>40 | 16<br>47 | 0.9915<br>28411 | + | . | TF=HOXA4;class=Ho<br>meo domain                                  |



|                       |          |          |          |          |                 |   |   |                                                                  |
|-----------------------|----------|----------|----------|----------|-----------------|---|---|------------------------------------------------------------------|
|                       |          |          |          |          |                 |   |   | factors;sequence=ATC<br>ATTAA                                    |
| ZEB1 NM_0<br>01323676 | TF<br>BS | TF<br>BS | 16<br>40 | 16<br>47 | 0.9915<br>28411 | + | . | TF=HOXA4;class=Ho<br>meo domain<br>factors;sequence=ATC<br>ATTAA |
| ZEB1 NM_0<br>01323649 | TF<br>BS | TF<br>BS | 26<br>6  | 27<br>3  | 0.9915<br>28411 | + | . | TF=HOXA4;class=Ho<br>meo domain<br>factors;sequence=ATC<br>ATTAA |
| ZEB1 NM_0<br>01323675 | TF<br>BS | TF<br>BS | 16<br>40 | 16<br>47 | 0.9915<br>28411 | + | . | TF=HOXA4;class=Ho<br>meo domain<br>factors;sequence=ATC<br>ATTAA |
| ZEB1 NM_0<br>01323672 | TF<br>BS | TF<br>BS | 16<br>40 | 16<br>47 | 0.9915<br>28411 | + | . | TF=HOXA4;class=Ho<br>meo domain<br>factors;sequence=ATC<br>ATTAA |
| ZEB1 NM_0<br>01323671 | TF<br>BS | TF<br>BS | 16<br>40 | 16<br>47 | 0.9915<br>28411 | + | . | TF=HOXA4;class=Ho<br>meo domain<br>factors;sequence=ATC<br>ATTAA |
| ZEB1 NM_0<br>01323642 | TF<br>BS | TF<br>BS | 66<br>4  | 67<br>1  | 0.9915<br>28411 | + | . | TF=HOXA4;class=Ho<br>meo domain<br>factors;sequence=ATC<br>ATTAA |
| ZEB1 NM_0<br>01174096 | TF<br>BS | TF<br>BS | 26<br>6  | 27<br>3  | 0.9915<br>28411 | + | . | TF=HOXA4;class=Ho<br>meo domain<br>factors;sequence=ATC<br>ATTAA |
| ZEB1 NM_0<br>30751    | TF<br>BS | TF<br>BS | 26<br>6  | 27<br>3  | 0.9915<br>28411 | + | . | TF=HOXA4;class=Ho<br>meo domain<br>factors;sequence=ATC<br>ATTAA |
| ZEB1 NM_0<br>01323638 | TF<br>BS | TF<br>BS | 39<br>5  | 40<br>2  | 0.9915<br>24102 | - | . | TF=GSX2;class=Home<br>o domain<br>factors;sequence=GTC<br>ATTAA  |
| ZEB1 NM_0<br>01323643 | TF<br>BS | TF<br>BS | 39<br>5  | 40<br>2  | 0.9915<br>24102 | - | . | TF=GSX2;class=Home<br>o domain<br>factors;sequence=GTC<br>ATTAA  |
| ZEB1 NM_0<br>01323647 | TF<br>BS | TF<br>BS | 23<br>25 | 23<br>33 | 0.9914<br>88497 | - | . | TF=THAP1;class=C2C<br>H THAP-type zinc                           |

|                       |          |          |          |          |                 |   |   |  |                                                                                    |
|-----------------------|----------|----------|----------|----------|-----------------|---|---|--|------------------------------------------------------------------------------------|
|                       |          |          |          |          |                 |   |   |  | finger<br>factors;sequence=CTG<br>CCCTCA                                           |
| ZEB1 NM_0<br>01128128 | TF<br>BS | TF<br>BS | 23<br>25 | 23<br>33 | 0.9914<br>88497 | - | . |  | TF=THAP1;class=C2C<br>H THAP-type zinc<br>finger<br>factors;sequence=CTG<br>CCCTCA |
| ZEB1 NM_0<br>01323641 | TF<br>BS | TF<br>BS | 23<br>25 | 23<br>33 | 0.9914<br>88497 | - | . |  | TF=THAP1;class=C2C<br>H THAP-type zinc<br>finger<br>factors;sequence=CTG<br>CCCTCA |
| ZEB1 NM_0<br>01323638 | TF<br>BS | TF<br>BS | 23<br>25 | 23<br>33 | 0.9914<br>88497 | - | . |  | TF=THAP1;class=C2C<br>H THAP-type zinc<br>finger<br>factors;sequence=CTG<br>CCCTCA |
| ZEB1 NM_0<br>01323644 | TF<br>BS | TF<br>BS | 23<br>25 | 23<br>33 | 0.9914<br>88497 | - | . |  | TF=THAP1;class=C2C<br>H THAP-type zinc<br>finger<br>factors;sequence=CTG<br>CCCTCA |
| ZEB1 NM_0<br>01323643 | TF<br>BS | TF<br>BS | 23<br>25 | 23<br>33 | 0.9914<br>88497 | - | . |  | TF=THAP1;class=C2C<br>H THAP-type zinc<br>finger<br>factors;sequence=CTG<br>CCCTCA |
| ZEB1 NM_0<br>01323674 | TF<br>BS | TF<br>BS | 23<br>25 | 23<br>33 | 0.9914<br>88497 | - | . |  | TF=THAP1;class=C2C<br>H THAP-type zinc<br>finger<br>factors;sequence=CTG<br>CCCTCA |
| ZEB1 NM_0<br>01323673 | TF<br>BS | TF<br>BS | 23<br>25 | 23<br>33 | 0.9914<br>88497 | - | . |  | TF=THAP1;class=C2C<br>H THAP-type zinc<br>finger<br>factors;sequence=CTG<br>CCCTCA |
| ZEB1 NM_0<br>01323658 | TF<br>BS | TF<br>BS | 23<br>25 | 23<br>33 | 0.9914<br>88497 | - | . |  | TF=THAP1;class=C2C<br>H THAP-type zinc<br>finger<br>factors;sequence=CTG<br>CCCTCA |
| ZEB1 NM_0             | TF       | TF       | 23       | 23       | 0.9914          | - | . |  | TF=THAP1;class=C2C                                                                 |

|                       |          |          |          |          |                 |   |   |  |                                                                                    |
|-----------------------|----------|----------|----------|----------|-----------------|---|---|--|------------------------------------------------------------------------------------|
| 01323657              | BS       | BS       | 25       | 33       | 88497           |   |   |  | H THAP-type zinc<br>finger<br>factors;sequence=CTG<br>CCCTCA                       |
| ZEB1 NM_0<br>01323650 | TF<br>BS | TF<br>BS | 23<br>25 | 23<br>33 | 0.9914<br>88497 | - | . |  | TF=THAP1;class=C2C<br>H THAP-type zinc<br>finger<br>factors;sequence=CTG<br>CCCTCA |
| ZEB1 NM_0<br>01323648 | TF<br>BS | TF<br>BS | 23<br>25 | 23<br>33 | 0.9914<br>88497 | - | . |  | TF=THAP1;class=C2C<br>H THAP-type zinc<br>finger<br>factors;sequence=CTG<br>CCCTCA |
| ZEB1 NM_0<br>01174095 | TF<br>BS | TF<br>BS | 23<br>25 | 23<br>33 | 0.9914<br>88497 | - | . |  | TF=THAP1;class=C2C<br>H THAP-type zinc<br>finger<br>factors;sequence=CTG<br>CCCTCA |
| ZEB1 NM_0<br>01323646 | TF<br>BS | TF<br>BS | 23<br>25 | 23<br>33 | 0.9914<br>88497 | - | . |  | TF=THAP1;class=C2C<br>H THAP-type zinc<br>finger<br>factors;sequence=CTG<br>CCCTCA |
| ZEB1 NM_0<br>01323645 | TF<br>BS | TF<br>BS | 23<br>25 | 23<br>33 | 0.9914<br>88497 | - | . |  | TF=THAP1;class=C2C<br>H THAP-type zinc<br>finger<br>factors;sequence=CTG<br>CCCTCA |
| ZEB1 NM_0<br>01174093 | TF<br>BS | TF<br>BS | 23<br>25 | 23<br>33 | 0.9914<br>88497 | - | . |  | TF=THAP1;class=C2C<br>H THAP-type zinc<br>finger<br>factors;sequence=CTG<br>CCCTCA |
| ZEB1 NM_0<br>01323656 | TF<br>BS | TF<br>BS | 23<br>25 | 23<br>33 | 0.9914<br>88497 | - | . |  | TF=THAP1;class=C2C<br>H THAP-type zinc<br>finger<br>factors;sequence=CTG<br>CCCTCA |
| ZEB1 NM_0<br>01323655 | TF<br>BS | TF<br>BS | 23<br>25 | 23<br>33 | 0.9914<br>88497 | - | . |  | TF=THAP1;class=C2C<br>H THAP-type zinc<br>finger<br>factors;sequence=CTG<br>CCCTCA |

|                  |          |          |          |          |                 |   |   |                                                                                    |
|------------------|----------|----------|----------|----------|-----------------|---|---|------------------------------------------------------------------------------------|
| ZEB1 NM_01323654 | TF<br>BS | TF<br>BS | 23<br>25 | 23<br>33 | 0.9914<br>88497 | - | . | TF=THAP1;class=C2C<br>H THAP-type zinc<br>finger<br>factors;sequence=CTG<br>CCCTCA |
| ZEB1 NM_01323653 | TF<br>BS | TF<br>BS | 23<br>25 | 23<br>33 | 0.9914<br>88497 | - | . | TF=THAP1;class=C2C<br>H THAP-type zinc<br>finger<br>factors;sequence=CTG<br>CCCTCA |
| ZEB1 NM_01323652 | TF<br>BS | TF<br>BS | 23<br>25 | 23<br>33 | 0.9914<br>88497 | - | . | TF=THAP1;class=C2C<br>H THAP-type zinc<br>finger<br>factors;sequence=CTG<br>CCCTCA |
| ZEB1 NM_01323651 | TF<br>BS | TF<br>BS | 23<br>25 | 23<br>33 | 0.9914<br>88497 | - | . | TF=THAP1;class=C2C<br>H THAP-type zinc<br>finger<br>factors;sequence=CTG<br>CCCTCA |
| ZEB1 NM_01323678 | TF<br>BS | TF<br>BS | 23<br>25 | 23<br>33 | 0.9914<br>88497 | - | . | TF=THAP1;class=C2C<br>H THAP-type zinc<br>finger<br>factors;sequence=CTG<br>CCCTCA |
| ZEB1 NM_01323677 | TF<br>BS | TF<br>BS | 23<br>25 | 23<br>33 | 0.9914<br>88497 | - | . | TF=THAP1;class=C2C<br>H THAP-type zinc<br>finger<br>factors;sequence=CTG<br>CCCTCA |
| ZEB1 NM_01323676 | TF<br>BS | TF<br>BS | 23<br>25 | 23<br>33 | 0.9914<br>88497 | - | . | TF=THAP1;class=C2C<br>H THAP-type zinc<br>finger<br>factors;sequence=CTG<br>CCCTCA |
| ZEB1 NM_01323649 | TF<br>BS | TF<br>BS | 23<br>25 | 23<br>33 | 0.9914<br>88497 | - | . | TF=THAP1;class=C2C<br>H THAP-type zinc<br>finger<br>factors;sequence=CTG<br>CCCTCA |
| ZEB1 NM_01323675 | TF<br>BS | TF<br>BS | 23<br>25 | 23<br>33 | 0.9914<br>88497 | - | . | TF=THAP1;class=C2C<br>H THAP-type zinc<br>finger<br>factors;sequence=CTG           |

|                  |          |          |          |          |                 |   |   |  |                                                                                    |
|------------------|----------|----------|----------|----------|-----------------|---|---|--|------------------------------------------------------------------------------------|
|                  |          |          |          |          |                 |   |   |  | CCCTCA                                                                             |
| ZEB1 NM_01323672 | TF<br>BS | TF<br>BS | 23<br>25 | 23<br>33 | 0.9914<br>88497 | - | . |  | TF=THAP1;class=C2C<br>H THAP-type zinc<br>finger<br>factors;sequence=CTG<br>CCCTCA |
| ZEB1 NM_01323671 | TF<br>BS | TF<br>BS | 23<br>25 | 23<br>33 | 0.9914<br>88497 | - | . |  | TF=THAP1;class=C2C<br>H THAP-type zinc<br>finger<br>factors;sequence=CTG<br>CCCTCA |
| ZEB1 NM_01323666 | TF<br>BS | TF<br>BS | 23<br>25 | 23<br>33 | 0.9914<br>88497 | - | . |  | TF=THAP1;class=C2C<br>H THAP-type zinc<br>finger<br>factors;sequence=CTG<br>CCCTCA |
| ZEB1 NM_01323642 | TF<br>BS | TF<br>BS | 23<br>25 | 23<br>33 | 0.9914<br>88497 | - | . |  | TF=THAP1;class=C2C<br>H THAP-type zinc<br>finger<br>factors;sequence=CTG<br>CCCTCA |
| ZEB1 NM_01174096 | TF<br>BS | TF<br>BS | 23<br>25 | 23<br>33 | 0.9914<br>88497 | - | . |  | TF=THAP1;class=C2C<br>H THAP-type zinc<br>finger<br>factors;sequence=CTG<br>CCCTCA |
| ZEB1 NM_30751    | TF<br>BS | TF<br>BS | 23<br>25 | 23<br>33 | 0.9914<br>88497 | - | . |  | TF=THAP1;class=C2C<br>H THAP-type zinc<br>finger<br>factors;sequence=CTG<br>CCCTCA |
| ZEB1 NM_01323665 | TF<br>BS | TF<br>BS | 23<br>25 | 23<br>33 | 0.9914<br>88497 | - | . |  | TF=THAP1;class=C2C<br>H THAP-type zinc<br>finger<br>factors;sequence=CTG<br>CCCTCA |
| ZEB1 NM_01323664 | TF<br>BS | TF<br>BS | 23<br>25 | 23<br>33 | 0.9914<br>88497 | - | . |  | TF=THAP1;class=C2C<br>H THAP-type zinc<br>finger<br>factors;sequence=CTG<br>CCCTCA |
| ZEB1 NM_01323663 | TF<br>BS | TF<br>BS | 23<br>25 | 23<br>33 | 0.9914<br>88497 | - | . |  | TF=THAP1;class=C2C<br>H THAP-type zinc<br>finger                                   |

|                       |          |          |          |          |                 |   |   |                                                                                    |
|-----------------------|----------|----------|----------|----------|-----------------|---|---|------------------------------------------------------------------------------------|
|                       |          |          |          |          |                 |   |   | factors;sequence=CTG<br>CCCTCA                                                     |
| ZEB1 NM_0<br>01323662 | TF<br>BS | TF<br>BS | 23<br>25 | 23<br>33 | 0.9914<br>88497 | - | . | TF=THAP1;class=C2C<br>H THAP-type zinc<br>finger<br>factors;sequence=CTG<br>CCCTCA |
| ZEB1 NM_0<br>01323661 | TF<br>BS | TF<br>BS | 23<br>25 | 23<br>33 | 0.9914<br>88497 | - | . | TF=THAP1;class=C2C<br>H THAP-type zinc<br>finger<br>factors;sequence=CTG<br>CCCTCA |
| ZEB1 NM_0<br>01323660 | TF<br>BS | TF<br>BS | 23<br>25 | 23<br>33 | 0.9914<br>88497 | - | . | TF=THAP1;class=C2C<br>H THAP-type zinc<br>finger<br>factors;sequence=CTG<br>CCCTCA |
| ZEB1 NM_0<br>01323659 | TF<br>BS | TF<br>BS | 23<br>25 | 23<br>33 | 0.9914<br>88497 | - | . | TF=THAP1;class=C2C<br>H THAP-type zinc<br>finger<br>factors;sequence=CTG<br>CCCTCA |
| ZEB1 NM_0<br>01174094 | TF<br>BS | TF<br>BS | 23<br>25 | 23<br>33 | 0.9914<br>88497 | - | . | TF=THAP1;class=C2C<br>H THAP-type zinc<br>finger<br>factors;sequence=CTG<br>CCCTCA |
| ZEB1 NM_0<br>01323673 | TF<br>BS | TF<br>BS | 16<br>66 | 16<br>75 | 0.9911<br>27936 | - | . | TF=MNX1;class=Home<br>o domain<br>factors;sequence=AAT<br>AATTAAA                  |
| ZEB1 NM_0<br>01323677 | TF<br>BS | TF<br>BS | 16<br>66 | 16<br>75 | 0.9911<br>27936 | - | . | TF=MNX1;class=Home<br>o domain<br>factors;sequence=AAT<br>AATTAAA                  |
| ZEB1 NM_0<br>01323676 | TF<br>BS | TF<br>BS | 16<br>66 | 16<br>75 | 0.9911<br>27936 | - | . | TF=MNX1;class=Home<br>o domain<br>factors;sequence=AAT<br>AATTAAA                  |
| ZEB1 NM_0<br>01323675 | TF<br>BS | TF<br>BS | 16<br>66 | 16<br>75 | 0.9911<br>27936 | - | . | TF=MNX1;class=Home<br>o domain<br>factors;sequence=AAT<br>AATTAAA                  |
| ZEB1 NM_0             | TF       | TF       | 16       | 16       | 0.9911          | - | . | TF=MNX1;class=Home                                                                 |

|                       |          |          |          |          |                 |   |   |                                                                                      |
|-----------------------|----------|----------|----------|----------|-----------------|---|---|--------------------------------------------------------------------------------------|
| 01323672              | BS       | BS       | 66       | 75       | 27936           |   |   | o domain<br>factors;sequence=AAT<br>AATTAAA                                          |
| ZEB1 NM_0<br>01323671 | TF<br>BS | TF<br>BS | 16<br>66 | 16<br>75 | 0.9911<br>27936 | - | . | TF=MNX1;class=Home<br>o domain<br>factors;sequence=AAT<br>AATTAAA                    |
| ZEB1 NM_0<br>01128128 | TF<br>BS | TF<br>BS | 13<br>69 | 13<br>78 | 0.9906<br>813   | + | . | TF=NFIA;class=SMAD<br>/NF-1 DNA-binding<br>domain<br>factors;sequence=TGT<br>GCCAAGG |
| ZEB1 NM_0<br>01323673 | TF<br>BS | TF<br>BS | 91<br>0  | 91<br>9  | 0.9906<br>813   | + | . | TF=NFIA;class=SMAD<br>/NF-1 DNA-binding<br>domain<br>factors;sequence=TGT<br>GCCAAGG |
| ZEB1 NM_0<br>01323678 | TF<br>BS | TF<br>BS | 13<br>69 | 13<br>78 | 0.9906<br>813   | + | . | TF=NFIA;class=SMAD<br>/NF-1 DNA-binding<br>domain<br>factors;sequence=TGT<br>GCCAAGG |
| ZEB1 NM_0<br>01323677 | TF<br>BS | TF<br>BS | 91<br>0  | 91<br>9  | 0.9906<br>813   | + | . | TF=NFIA;class=SMAD<br>/NF-1 DNA-binding<br>domain<br>factors;sequence=TGT<br>GCCAAGG |
| ZEB1 NM_0<br>01323676 | TF<br>BS | TF<br>BS | 91<br>0  | 91<br>9  | 0.9906<br>813   | + | . | TF=NFIA;class=SMAD<br>/NF-1 DNA-binding<br>domain<br>factors;sequence=TGT<br>GCCAAGG |
| ZEB1 NM_0<br>01323675 | TF<br>BS | TF<br>BS | 91<br>0  | 91<br>9  | 0.9906<br>813   | + | . | TF=NFIA;class=SMAD<br>/NF-1 DNA-binding<br>domain<br>factors;sequence=TGT<br>GCCAAGG |
| ZEB1 NM_0<br>01323672 | TF<br>BS | TF<br>BS | 91<br>0  | 91<br>9  | 0.9906<br>813   | + | . | TF=NFIA;class=SMAD<br>/NF-1 DNA-binding<br>domain<br>factors;sequence=TGT<br>GCCAAGG |
| ZEB1 NM_0<br>01323671 | TF<br>BS | TF<br>BS | 91<br>0  | 91<br>9  | 0.9906<br>813   | + | . | TF=NFIA;class=SMAD<br>/NF-1 DNA-binding                                              |

|                       |          |          |          |          |                 |   |   |                                                                                      |
|-----------------------|----------|----------|----------|----------|-----------------|---|---|--------------------------------------------------------------------------------------|
|                       |          |          |          |          |                 |   |   | domain<br>factors;sequence=TGT<br>GCCAAGG                                            |
| ZEB1 NM_0<br>01323666 | TF<br>BS | TF<br>BS | 13<br>69 | 13<br>78 | 0.9906<br>813   | + | . | TF=NFIA;class=SMAD<br>/NF-1 DNA-binding<br>domain<br>factors;sequence=TGT<br>GCCAAGG |
| ZEB1 NM_0<br>01323665 | TF<br>BS | TF<br>BS | 13<br>69 | 13<br>78 | 0.9906<br>813   | + | . | TF=NFIA;class=SMAD<br>/NF-1 DNA-binding<br>domain<br>factors;sequence=TGT<br>GCCAAGG |
| ZEB1 NM_0<br>01323664 | TF<br>BS | TF<br>BS | 13<br>69 | 13<br>78 | 0.9906<br>813   | + | . | TF=NFIA;class=SMAD<br>/NF-1 DNA-binding<br>domain<br>factors;sequence=TGT<br>GCCAAGG |
| ZEB1 NM_0<br>01323663 | TF<br>BS | TF<br>BS | 13<br>69 | 13<br>78 | 0.9906<br>813   | + | . | TF=NFIA;class=SMAD<br>/NF-1 DNA-binding<br>domain<br>factors;sequence=TGT<br>GCCAAGG |
| ZEB1 NM_0<br>01323662 | TF<br>BS | TF<br>BS | 13<br>69 | 13<br>78 | 0.9906<br>813   | + | . | TF=NFIA;class=SMAD<br>/NF-1 DNA-binding<br>domain<br>factors;sequence=TGT<br>GCCAAGG |
| ZEB1 NM_0<br>01174094 | TF<br>BS | TF<br>BS | 13<br>69 | 13<br>78 | 0.9906<br>813   | + | . | TF=NFIA;class=SMAD<br>/NF-1 DNA-binding<br>domain<br>factors;sequence=TGT<br>GCCAAGG |
| ZEB1 NM_0<br>01128128 | TF<br>BS | TF<br>BS | 19<br>08 | 19<br>19 | 0.9904<br>64788 | + | . | TF=KLF4;class=C2H2<br>zinc finger<br>factors;sequence=AGC<br>CCCACCCCC               |
| ZEB1 NM_0<br>01323673 | TF<br>BS | TF<br>BS | 14<br>49 | 14<br>60 | 0.9904<br>64788 | + | . | TF=KLF4;class=C2H2<br>zinc finger<br>factors;sequence=AGC<br>CCCACCCCC               |
| ZEB1 NM_0<br>01323678 | TF<br>BS | TF<br>BS | 19<br>08 | 19<br>19 | 0.9904<br>64788 | + | . | TF=KLF4;class=C2H2<br>zinc finger<br>factors;sequence=AGC                            |



|                  |          |          |          |          |                 |   |   |                                                                                     |
|------------------|----------|----------|----------|----------|-----------------|---|---|-------------------------------------------------------------------------------------|
| ZEB1 NM_01323677 | TF<br>BS | TF<br>BS | 14<br>49 | 14<br>60 | 0.9904<br>64788 | + | . | CCCACCCCC<br>TF=KLF4;class=C2H2<br>zinc finger<br>factors;sequence=AGC<br>CCCACCCCC |
| ZEB1 NM_01323676 | TF<br>BS | TF<br>BS | 14<br>49 | 14<br>60 | 0.9904<br>64788 | + | . | TF=KLF4;class=C2H2<br>zinc finger<br>factors;sequence=AGC<br>CCCACCCCC              |
| ZEB1 NM_01323675 | TF<br>BS | TF<br>BS | 14<br>49 | 14<br>60 | 0.9904<br>64788 | + | . | TF=KLF4;class=C2H2<br>zinc finger<br>factors;sequence=AGC<br>CCCACCCCC              |
| ZEB1 NM_01323672 | TF<br>BS | TF<br>BS | 14<br>49 | 14<br>60 | 0.9904<br>64788 | + | . | TF=KLF4;class=C2H2<br>zinc finger<br>factors;sequence=AGC<br>CCCACCCCC              |
| ZEB1 NM_01323671 | TF<br>BS | TF<br>BS | 14<br>49 | 14<br>60 | 0.9904<br>64788 | + | . | TF=KLF4;class=C2H2<br>zinc finger<br>factors;sequence=AGC<br>CCCACCCCC              |
| ZEB1 NM_01323666 | TF<br>BS | TF<br>BS | 19<br>08 | 19<br>19 | 0.9904<br>64788 | + | . | TF=KLF4;class=C2H2<br>zinc finger<br>factors;sequence=AGC<br>CCCACCCCC              |
| ZEB1 NM_01323665 | TF<br>BS | TF<br>BS | 19<br>08 | 19<br>19 | 0.9904<br>64788 | + | . | TF=KLF4;class=C2H2<br>zinc finger<br>factors;sequence=AGC<br>CCCACCCCC              |
| ZEB1 NM_01323664 | TF<br>BS | TF<br>BS | 19<br>08 | 19<br>19 | 0.9904<br>64788 | + | . | TF=KLF4;class=C2H2<br>zinc finger<br>factors;sequence=AGC<br>CCCACCCCC              |
| ZEB1 NM_01323663 | TF<br>BS | TF<br>BS | 19<br>08 | 19<br>19 | 0.9904<br>64788 | + | . | TF=KLF4;class=C2H2<br>zinc finger<br>factors;sequence=AGC<br>CCCACCCCC              |
| ZEB1 NM_01323662 | TF<br>BS | TF<br>BS | 19<br>08 | 19<br>19 | 0.9904<br>64788 | + | . | TF=KLF4;class=C2H2<br>zinc finger<br>factors;sequence=AGC<br>CCCACCCCC              |
| ZEB1 NM_01174094 | TF<br>BS | TF<br>BS | 19<br>08 | 19<br>19 | 0.9904<br>64788 | + | . | TF=KLF4;class=C2H2<br>zinc finger<br>factors;sequence=AGC                           |

---

CCCACCCC

---
