# Supplementary material for: Development of a Ferroptosis-Related lncRNA Signature to Predict the Prognosis and Immune Landscape of Bladder Cancer
Source: Hindawi journal article supplement (doi:10.1155/2021/1031906), 2021-06-20
Supplement: f1 [file 1031906.f1.zip]

Supplementary Table S8. The prediction of the transcription factors of MAGI2-AS3.

| seqname             | source | feature | start | end  | score | strand | frame | attributes                                                           |
|---------------------|--------|---------|-------|------|-------|--------|-------|----------------------------------------------------------------------|
| MAGI2-AS3 NR_038345 | TFBS   | TFBS    | 1067  | 1072 | 1     | +      | .     | TF=ZNF354C;class=C2H2 zinc finger factors;sequence=ATCCAC            |
| MAGI2-AS3 NR_038345 | TFBS   | TFBS    | 479   | 486  | 1     | -      | .     | TF=GATA3;class=Other C4 zinc finger-type factors;sequence=AGATAAGA   |
| MAGI2-AS3 NR_038345 | TFBS   | TFBS    | 1396  | 1403 | 1     | +      | .     | TF=TFE3;class=Basic helix-loop-helix factors (bHLH);sequence=ACGTGAC |
| MAGI2-AS3 NR_038345 | TFBS   | TFBS    | 358   | 365  | 1     | +      | .     | TF=HOXA4;class=Homeo domain factors;sequence=GTCATTAG                |
| MAGI2-AS3 NR_038346 | TFBS   | TFBS    | 1067  | 1072 | 1     | +      | .     | TF=ZNF354C;class=C2H2 zinc finger factors;sequence=ATCCAC            |
| MAGI2-AS3 NR_038346 | TFBS   | TFBS    | 479   | 486  | 1     | -      | .     | TF=GATA3;class=Other C4 zinc finger-type factors;sequence=AGATAAGA   |
| MAGI2-AS3 NR_038346 | TFBS   | TFBS    | 1396  | 1403 | 1     | +      | .     | TF=TFE3;class=Basic helix-loop-helix factors (bHLH);sequence=ACGTGAC |
| MAGI2-AS3 NR_038346 | TFBS   | TFBS    | 358   | 365  | 1     | +      | .     | TF=HOXA4;class=Homeo domain factors;sequence=GTCATTAG                |
| MAGI2-AS3 NR_038344 | TFBS   | TFBS    | 64    | 69   | 1     | +      | .     | TF=ZNF354C;class=C2H2 zinc finger factors;sequence=ATCCAC            |

|                     |      |      |          |          |                 |   |   |                                                                                           |
|---------------------|------|------|----------|----------|-----------------|---|---|-------------------------------------------------------------------------------------------|
| MAGI2-AS3 NR_038344 | TFBS | TFBS | 111<br>5 | 11<br>22 | 1               | - | . | TF=ARNT::HIF1A;class=Basic<br>helix-loop-helix<br>factors<br>(bHLH);sequence=GG<br>ACGTGC |
| MAGI2-AS3 NR_038344 | TFBS | TFBS | 393      | 40<br>0  | 1               | + | . | TF=TFE3;class=Basic<br>helix-loop-helix<br>factors<br>(bHLH);sequence=CA<br>CGTGAC        |
| MAGI2-AS3 NR_038344 | TFBS | TFBS | 144<br>3 | 14<br>52 | 1               | - | . | TF=PLAGL2;class=C2<br>H2 zinc finger<br>factors;sequence=T<br>GGGCCCCCT                   |
| MAGI2-AS3 NR_038343 | TFBS | TFBS | 64       | 69       | 1               | + | . | TF=ZNF354C;class=C<br>2H2 zinc finger<br>factors;sequence=A<br>TCCAC                      |
| MAGI2-AS3 NR_038343 | TFBS | TFBS | 111<br>5 | 11<br>22 | 1               | - | . | TF=ARNT::HIF1A;class=Basic<br>helix-loop-helix<br>factors<br>(bHLH);sequence=GG<br>ACGTGC |
| MAGI2-AS3 NR_038343 | TFBS | TFBS | 393      | 40<br>0  | 1               | + | . | TF=TFE3;class=Basic<br>helix-loop-helix<br>factors<br>(bHLH);sequence=CA<br>CGTGAC        |
| MAGI2-AS3 NR_038343 | TFBS | TFBS | 144<br>3 | 14<br>52 | 1               | - | . | TF=PLAGL2;class=C2<br>H2 zinc finger<br>factors;sequence=T<br>GGGCCCCCT                   |
| MAGI2-AS3 NR_038345 | TFBS | TFBS | 358      | 36<br>5  | 0.99964<br>62   | + | . | TF=HOXC4;class=Homeo<br>domain<br>factors;sequence=G<br>TCATTAG                           |
| MAGI2-AS3 NR_038346 | TFBS | TFBS | 358      | 36<br>5  | 0.99964<br>62   | + | . | TF=HOXC4;class=Homeo<br>domain<br>factors;sequence=G<br>TCATTAG                           |
| MAGI2-AS3 NR_038345 | TFBS | TFBS | 46       | 53       | 0.99956<br>5985 | - | . | TF=HOXC4;class=Homeo<br>domain                                                            |

|                     |      |      |      |      |             |   |   |                                                                                                       |
|---------------------|------|------|------|------|-------------|---|---|-------------------------------------------------------------------------------------------------------|
| MAGI2-AS3 NR_038346 | TFBS | TFBS | 46   | 53   | 0.999565985 | - | . | factors;sequence=ATCATTAATF=HOXC4;class=Homeo domain                                                  |
| MAGI2-AS3 NR_038345 | TFBS | TFBS | 358  | 365  | 0.999557369 | + | . | factors;sequence=ATCATTAATF=HOXD4;class=Homeo domain                                                  |
| MAGI2-AS3 NR_038346 | TFBS | TFBS | 358  | 365  | 0.999557369 | + | . | factors;sequence=ATCATTAATF=HOXD4;class=Homeo domain                                                  |
| MAGI2-AS3 NR_038345 | TFBS | TFBS | 1394 | 1403 | 0.999495867 | - | . | factors;sequence=ATCATTAATF=ARNT2;class=Basic helix-loop-helix factors (bHLH);sequence=GT             |
| MAGI2-AS3 NR_038346 | TFBS | TFBS | 1394 | 1403 | 0.999495867 | - | . | factors;sequence=GT CACGTGCGTF=ARNT2;class=Basic helix-loop-helix factors (bHLH);sequence=GT CACGTGCG |
| MAGI2-AS3 NR_038344 | TFBS | TFBS | 391  | 400  | 0.999495867 | - | . | factors;sequence=GT CACGTGCGTF=ARNT2;class=Basic helix-loop-helix factors (bHLH);sequence=GT CACGTGCG |
| MAGI2-AS3 NR_038343 | TFBS | TFBS | 391  | 400  | 0.999495867 | - | . | factors;sequence=GT CACGTGCGTF=ARNT2;class=Basic helix-loop-helix factors (bHLH);sequence=GT CACGTGCG |
| MAGI2-AS3 NR_038345 | TFBS | TFBS | 46   | 53   | 0.999331142 | - | . | factors;sequence=ATCATTAATF=HOXD4;class=Homeo domain                                                  |
| MAGI2-AS3 NR_038346 | TFBS | TFBS | 46   | 53   | 0.999331142 | - | . | factors;sequence=ATCATTAATF=HOXD4;class=Homeo domain                                                  |
| MAGI2-AS3 NR_038345 | TFBS | TFBS | 2259 | 2269 | 0.999251668 | + | . | factors;sequence=ATCATTAATF=FOS;class=Basic leucine zipper                                            |

|                         |          |      |          |          |                 |   |   |  |                                                                                    |
|-------------------------|----------|------|----------|----------|-----------------|---|---|--|------------------------------------------------------------------------------------|
|                         |          |      |          |          |                 |   |   |  | factors<br>(bZIP);sequence=TC<br>TGACTCATT<br>TF=FOS;class=Basic<br>leucine zipper |
| MAGI2-AS3 NR<br>_038346 | TFB<br>S | TFBS | 225<br>9 | 22<br>69 | 0.99925<br>1668 | + | . |  | factors<br>(bZIP);sequence=TC<br>TGACTCATT<br>TF=FOS;class=Basic<br>leucine zipper |
| MAGI2-AS3 NR<br>_038344 | TFB<br>S | TFBS | 225<br>9 | 22<br>69 | 0.99925<br>1668 | + | . |  | factors<br>(bZIP);sequence=TC<br>TGACTCATT<br>TF=FOS;class=Basic<br>leucine zipper |
| MAGI2-AS3 NR<br>_038345 | TFB<br>S | TFBS | 358      | 36<br>5  | 0.99905<br>3421 | + | . |  | factors<br>(bZIP);sequence=TC<br>TGACTCATT<br>TF=HOXB4;class=Hom<br>eo domain      |
| MAGI2-AS3 NR<br>_038345 | TFB<br>S | TFBS | 46       | 53       | 0.99905<br>3421 | - | . |  | factors;sequence=G<br>TCATTAG<br>TF=HOXB4;class=Hom<br>eo domain                   |
| MAGI2-AS3 NR<br>_038346 | TFB<br>S | TFBS | 358      | 36<br>5  | 0.99905<br>3421 | + | . |  | factors;sequence=A<br>TCATTAA<br>TF=HOXB4;class=Hom<br>eo domain                   |
| MAGI2-AS3 NR<br>_038346 | TFB<br>S | TFBS | 46       | 53       | 0.99905<br>3421 | - | . |  | factors;sequence=G<br>TCATTAG<br>TF=HOXB4;class=Hom<br>eo domain                   |
| MAGI2-AS3 NR<br>_038345 | TFB<br>S | TFBS | 683      | 68<br>9  | 0.99630<br>5873 | - | . |  | factors;sequence=A<br>TCATTAA<br>TF=FOXL1;class=For<br>k head / winged<br>helix    |
| MAGI2-AS3 NR<br>_038346 | TFB<br>S | TFBS | 683      | 68<br>9  | 0.99630<br>5873 | - | . |  | factors;sequence=A<br>TAAACA<br>TF=FOXL1;class=For<br>k head / winged<br>helix     |
| MAGI2-AS3 NR<br>_038345 | TFB<br>S | TFBS | 358      | 36<br>5  | 0.99621<br>3057 | + | . |  | factors;sequence=A<br>TAAACA<br>TF=GSX2;class=Home<br>o domain                     |
| MAGI2-AS3 NR            | TFB      | TFBS | 358      | 36       | 0.99621         | + | . |  | factors;sequence=G<br>TCATTAG<br>TF=GSX2;class=Home                                |

|                         |          |      |          |          |                 |   |   |                                                                                                 |
|-------------------------|----------|------|----------|----------|-----------------|---|---|-------------------------------------------------------------------------------------------------|
| _038346                 | S        |      |          | 5        | 3057            |   |   | o domain<br>factors;sequence=G<br>TCATTAG<br>TF=KLF5;class=C2H2                                 |
| MAGI2-AS3 NR<br>_038345 | TFB<br>S | TFBS | 187<br>5 | 18<br>84 | 0.99569<br>1748 | + | . | zinc finger<br>factors;sequence=G<br>CCCCTCCCC<br>TF=KLF5;class=C2H2                            |
| MAGI2-AS3 NR<br>_038346 | TFB<br>S | TFBS | 187<br>5 | 18<br>84 | 0.99569<br>1748 | + | . | zinc finger<br>factors;sequence=G<br>CCCCTCCCC<br>TF=KLF5;class=C2H2                            |
| MAGI2-AS3 NR<br>_038344 | TFB<br>S | TFBS | 872      | 88<br>1  | 0.99569<br>1748 | + | . | zinc finger<br>factors;sequence=G<br>CCCCTCCCC<br>TF=KLF5;class=C2H2                            |
| MAGI2-AS3 NR<br>_038343 | TFB<br>S | TFBS | 872      | 88<br>1  | 0.99569<br>1748 | + | . | zinc finger<br>factors;sequence=G<br>CCCCTCCCC<br>TF=NR2C2(var.2);cl<br>ass=Nuclear             |
| MAGI2-AS3 NR<br>_038345 | TFB<br>S | TFBS | 179<br>7 | 18<br>04 | 0.99523<br>7296 | + | . | receptors with C4<br>zinc<br>fingers;sequence=G<br>AGGTCAG<br>TF=NR2C2(var.2);cl<br>ass=Nuclear |
| MAGI2-AS3 NR<br>_038346 | TFB<br>S | TFBS | 179<br>7 | 18<br>04 | 0.99523<br>7296 | + | . | receptors with C4<br>zinc<br>fingers;sequence=G<br>AGGTCAG<br>TF=NR2C2(var.2);cl<br>ass=Nuclear |
| MAGI2-AS3 NR<br>_038344 | TFB<br>S | TFBS | 794      | 80<br>1  | 0.99523<br>7296 | + | . | receptors with C4<br>zinc<br>fingers;sequence=G<br>AGGTCAG<br>TF=NR2C2(var.2);cl<br>ass=Nuclear |
| MAGI2-AS3 NR<br>_038343 | TFB<br>S | TFBS | 794      | 80<br>1  | 0.99523<br>7296 | + | . | receptors with C4<br>zinc<br>fingers;sequence=G<br>AGGTCAG<br>TF=MEIS1;class=Hom                |
| MAGI2-AS3 NR            | TFB      | TFBS | 236      | 23       | 0.99498         | - | . |                                                                                                 |

|                         |          |      |          |          |                 |   |   |                                                                                         |
|-------------------------|----------|------|----------|----------|-----------------|---|---|-----------------------------------------------------------------------------------------|
| _038345                 | S        |      | 4        | 70       | 9704            |   |   | eo domain<br>factors;sequence=C<br>TGACAG<br>TF=MEIS1;class=Hom                         |
| MAGI2-AS3 NR<br>_038346 | TFB<br>S | TFBS | 236<br>4 | 23<br>70 | 0.99498<br>9704 | - | . | eo domain<br>factors;sequence=C<br>TGACAG<br>TF=MEIS1;class=Hom                         |
| MAGI2-AS3 NR<br>_038344 | TFB<br>S | TFBS | 236<br>4 | 23<br>70 | 0.99498<br>9704 | - | . | eo domain<br>factors;sequence=C<br>TGACAG<br>TF=HOXA4;class=Hom                         |
| MAGI2-AS3 NR<br>_038345 | TFB<br>S | TFBS | 786      | 79<br>3  | 0.99414<br>8567 | - | . | eo domain<br>factors;sequence=G<br>TCATTAC<br>TF=HOXA4;class=Hom                        |
| MAGI2-AS3 NR<br>_038346 | TFB<br>S | TFBS | 786      | 79<br>3  | 0.99414<br>8567 | - | . | eo domain<br>factors;sequence=G<br>TCATTAC<br>TF=SOX18;class=Hig                        |
| MAGI2-AS3 NR<br>_038343 | TFB<br>S | TFBS | 243<br>6 | 24<br>43 | 0.99406<br>9584 | + | . | h-mobility group<br>(HMG) domain<br>factors;sequence=G<br>ACAATGC<br>TF=ZNF354C;class=C |
| MAGI2-AS3 NR<br>_038345 | TFB<br>S | TFBS | 73       | 78       | 0.99404<br>8003 | + | . | 2H2 zinc finger<br>factors;sequence=C<br>TCCAC<br>TF=ZNF354C;class=C                    |
| MAGI2-AS3 NR<br>_038346 | TFB<br>S | TFBS | 73       | 78       | 0.99404<br>8003 | + | . | 2H2 zinc finger<br>factors;sequence=C<br>TCCAC<br>TF=NKX6-3;class=Ho                    |
| MAGI2-AS3 NR<br>_038345 | TFB<br>S | TFBS | 216<br>8 | 21<br>76 | 0.99353<br>6806 | + | . | meo domain<br>factors;sequence=C<br>CCATTAAA<br>TF=NKX6-3;class=Ho                      |
| MAGI2-AS3 NR<br>_038346 | TFB<br>S | TFBS | 216<br>8 | 21<br>76 | 0.99353<br>6806 | + | . | meo domain<br>factors;sequence=C<br>CCATTAAA<br>TF=NKX6-3;class=Ho                      |
| MAGI2-AS3 NR<br>_038344 | TFB<br>S | TFBS | 216<br>8 | 21<br>76 | 0.99353<br>6806 | + | . | meo domain<br>factors;sequence=C<br>CCATTAAA                                            |

|                         |          |      |          |          |                 |   |   |                                                                                                |
|-------------------------|----------|------|----------|----------|-----------------|---|---|------------------------------------------------------------------------------------------------|
| MAGI2-AS3 NR<br>_038345 | TFB<br>S | TFBS | 855      | 86<br>3  | 0.99310<br>2439 | + | . | TF=POU3F4;class=Homeo domain<br>factors;sequence=TAGTCTAAT                                     |
| MAGI2-AS3 NR<br>_038346 | TFB<br>S | TFBS | 855      | 86<br>3  | 0.99310<br>2439 | + | . | TF=POU3F4;class=Homeo domain<br>factors;sequence=TAGTCTAAT                                     |
| MAGI2-AS3 NR<br>_038344 | TFB<br>S | TFBS | 181<br>3 | 18<br>22 | 0.99303<br>3649 | - | . | TF=BHLHE22(var.2);<br>class=Basic<br>helix-loop-helix<br>factors<br>(bHLH);sequence=TGCAGCTGCC |
| MAGI2-AS3 NR<br>_038343 | TFB<br>S | TFBS | 181<br>3 | 18<br>22 | 0.99303<br>3649 | - | . | TF=BHLHE22(var.2);<br>class=Basic<br>helix-loop-helix<br>factors<br>(bHLH);sequence=TGCAGCTGCC |
| MAGI2-AS3 NR<br>_038344 | TFB<br>S | TFBS | 181<br>3 | 18<br>22 | 0.99302<br>0439 | + | . | TF=BHLHE22(var.2);<br>class=Basic<br>helix-loop-helix<br>factors<br>(bHLH);sequence=GGCAGCTGCA |
| MAGI2-AS3 NR<br>_038343 | TFB<br>S | TFBS | 181<br>3 | 18<br>22 | 0.99302<br>0439 | + | . | TF=BHLHE22(var.2);<br>class=Basic<br>helix-loop-helix<br>factors<br>(bHLH);sequence=GGCAGCTGCA |
| MAGI2-AS3 NR<br>_038345 | TFB<br>S | TFBS | 187<br>4 | 18<br>84 | 0.99274<br>6735 | + | . | TF=MAZ;class=C2H2<br>zinc finger<br>factors;sequence=TAGCCCTCCCC                               |
| MAGI2-AS3 NR<br>_038346 | TFB<br>S | TFBS | 187<br>4 | 18<br>84 | 0.99274<br>6735 | + | . | TF=MAZ;class=C2H2<br>zinc finger<br>factors;sequence=TAGCCCTCCCC                               |
| MAGI2-AS3 NR<br>_038344 | TFB<br>S | TFBS | 871      | 88<br>1  | 0.99274<br>6735 | + | . | TF=MAZ;class=C2H2<br>zinc finger<br>factors;sequence=TAGCCCTCCCC                               |

|                         |          |      |          |          |                 |   |   |                                                                                             |
|-------------------------|----------|------|----------|----------|-----------------|---|---|---------------------------------------------------------------------------------------------|
| MAGI2-AS3 NR<br>_038343 | TFB<br>S | TFBS | 871      | 88<br>1  | 0.99274<br>6735 | + | . | TF=MAZ;class=C2H2<br>zinc finger<br>factors;sequence=T<br>CCCCCTCCCC                        |
| MAGI2-AS3 NR<br>_038345 | TFB<br>S | TFBS | 143<br>5 | 14<br>45 | 0.99248<br>4811 | - | . | TF=MAZ;class=C2H2<br>zinc finger<br>factors;sequence=T<br>CCCCCTCCCC                        |
| MAGI2-AS3 NR<br>_038346 | TFB<br>S | TFBS | 143<br>5 | 14<br>45 | 0.99248<br>4811 | - | . | TF=MAZ;class=C2H2<br>zinc finger<br>factors;sequence=T<br>CCCCCTCCCC                        |
| MAGI2-AS3 NR<br>_038344 | TFB<br>S | TFBS | 432      | 44<br>2  | 0.99248<br>4811 | - | . | TF=MAZ;class=C2H2<br>zinc finger<br>factors;sequence=T<br>CCCCCTCCCC                        |
| MAGI2-AS3 NR<br>_038343 | TFB<br>S | TFBS | 432      | 44<br>2  | 0.99248<br>4811 | - | . | TF=MAZ;class=C2H2<br>zinc finger<br>factors;sequence=T<br>CCCCCTCCCC                        |
| MAGI2-AS3 NR<br>_038345 | TFB<br>S | TFBS | 786      | 79<br>3  | 0.99225<br>0779 | - | . | TF=HOXC4;class=Hom<br>eo domain<br>factors;sequence=G<br>TCATTAC                            |
| MAGI2-AS3 NR<br>_038346 | TFB<br>S | TFBS | 786      | 79<br>3  | 0.99225<br>0779 | - | . | TF=HOXC4;class=Hom<br>eo domain<br>factors;sequence=G<br>TCATTAC                            |
| MAGI2-AS3 NR<br>_038345 | TFB<br>S | TFBS | 139<br>4 | 14<br>03 | 0.99203<br>9415 | + | . | TF=BHLHE40;class=B<br>asic<br>helix-loop-helix<br>factors<br>(bHLH);sequence=CG<br>CACGTGAC |
| MAGI2-AS3 NR<br>_038346 | TFB<br>S | TFBS | 139<br>4 | 14<br>03 | 0.99203<br>9415 | + | . | TF=BHLHE40;class=B<br>asic<br>helix-loop-helix<br>factors<br>(bHLH);sequence=CG<br>CACGTGAC |
| MAGI2-AS3 NR<br>_038344 | TFB<br>S | TFBS | 391      | 40<br>0  | 0.99203<br>9415 | + | . | TF=BHLHE40;class=B<br>asic<br>helix-loop-helix<br>factors                                   |



|                         |          |      |          |          |                 |   |   |  |                                                                                               |
|-------------------------|----------|------|----------|----------|-----------------|---|---|--|-----------------------------------------------------------------------------------------------|
|                         |          |      |          |          |                 |   |   |  | (bHLH);sequence=CG<br>CACGTGAC<br>TF=BHLHE40;class=Basic<br>helix-loop-helix<br>factors       |
| MAGI2-AS3 NR<br>_038343 | TFB<br>S | TFBS | 391      | 40<br>0  | 0.99203<br>9415 | + | . |  | (bHLH);sequence=CG<br>CACGTGAC<br>TF=HAND2;class=Basic<br>helix-loop-helix<br>factors         |
| MAGI2-AS3 NR<br>_038343 | TFB<br>S | TFBS | 247<br>3 | 24<br>82 | 0.99190<br>4082 | + | . |  | (bHLH);sequence=AA<br>CAGATGCC<br>TF=BARX1;class=Homeo<br>domain<br>factors;sequence=ACAATTAA |
| MAGI2-AS3 NR<br>_038345 | TFB<br>S | TFBS | 238<br>9 | 23<br>96 | 0.99181<br>4605 | + | . |  | TF=BARX1;class=Homeo<br>domain<br>factors;sequence=ACAATTAA                                   |
| MAGI2-AS3 NR<br>_038346 | TFB<br>S | TFBS | 238<br>9 | 23<br>96 | 0.99181<br>4605 | + | . |  | TF=BARX1;class=Homeo<br>domain<br>factors;sequence=ACAATTAA                                   |
| MAGI2-AS3 NR<br>_038344 | TFB<br>S | TFBS | 238<br>9 | 23<br>96 | 0.99181<br>4605 | + | . |  | TF=BARX1;class=Homeo<br>domain<br>factors;sequence=ACAATTAA                                   |
| MAGI2-AS3 NR<br>_038345 | TFB<br>S | TFBS | 46       | 53       | 0.99152<br>8411 | - | . |  | TF=HOXA4;class=Homeo<br>domain<br>factors;sequence=ATCATTA                                    |
| MAGI2-AS3 NR<br>_038346 | TFB<br>S | TFBS | 46       | 53       | 0.99152<br>8411 | - | . |  | TF=HOXA4;class=Homeo<br>domain<br>factors;sequence=ATCATTA                                    |
| MAGI2-AS3 NR<br>_038345 | TFB<br>S | TFBS | 786      | 79<br>3  | 0.99131<br>454  | - | . |  | TF=HOXA7;class=Homeo<br>domain<br>factors;sequence=GTCATTAC                                   |
| MAGI2-AS3 NR<br>_038346 | TFB<br>S | TFBS | 786      | 79<br>3  | 0.99131<br>454  | - | . |  | TF=HOXA7;class=Homeo<br>domain<br>factors;sequence=GTCATTAC                                   |
| MAGI2-AS3 NR<br>_038345 | TFB<br>S | TFBS | 786      | 79<br>3  | 0.99084<br>7565 | - | . |  | TF=HOXD8;class=Homeo<br>domain<br>factors;sequence=G                                          |

|                     |      |      |      |      |             |   |   |                                                                                                                                      |
|---------------------|------|------|------|------|-------------|---|---|--------------------------------------------------------------------------------------------------------------------------------------|
| MAGI2-AS3 NR_038346 | TFBS | TFBS | 786  | 793  | 0.990847565 | - | . | TCATTAC<br>TF=HOXD8;class=Homeo domain factors;sequence=GT<br>TCATTAC                                                                |
| MAGI2-AS3 NR_038345 | TFBS | TFBS | 786  | 793  | 0.99075971  | - | . | TF=HOXB8;class=Homeo domain factors;sequence=GT<br>TCATTAC                                                                           |
| MAGI2-AS3 NR_038346 | TFBS | TFBS | 786  | 793  | 0.99075971  | - | . | TF=HOXB8;class=Homeo domain factors;sequence=GT<br>TCATTAC                                                                           |
| MAGI2-AS3 NR_038345 | TFBS | TFBS | 1394 | 1404 | 0.990521718 | + | . | TF=TFEC;class=Basic helix-loop-helix factors (bHLH);sequence=CG<br>CACGTGACG                                                         |
| MAGI2-AS3 NR_038346 | TFBS | TFBS | 1394 | 1404 | 0.990521718 | + | . | TF=TFEC;class=Basic helix-loop-helix factors (bHLH);sequence=CG<br>CACGTGACG                                                         |
| MAGI2-AS3 NR_038344 | TFBS | TFBS | 391  | 401  | 0.990521718 | + | . | TF=TFEC;class=Basic helix-loop-helix factors (bHLH);sequence=CG<br>CACGTGACG                                                         |
| MAGI2-AS3 NR_038343 | TFBS | TFBS | 391  | 401  | 0.990521718 | + | . | TF=TFEC;class=Basic helix-loop-helix factors (bHLH);sequence=CG<br>CACGTGACG                                                         |
| MAGI2-AS3 NR_038345 | TFBS | TFBS | 682  | 689  | 0.990192875 | - | . | TF=FOXG1;class=Fork head / winged helix factors;sequence=ATAAACA<br>TF=FOXG1;class=Fork head / winged helix factors;sequence=ATAAACA |
| MAGI2-AS3 NR_038346 | TFBS | TFBS | 682  | 689  | 0.990192875 | - | . | TF=FOXG1;class=Fork head / winged helix factors;sequence=ATAAACA                                                                     |
