# Supplementary material for: Development of a Ferroptosis-Related lncRNA Signature to Predict the Prognosis and Immune Landscape of Bladder Cancer
Source: Hindawi journal article supplement (doi:10.1155/2021/1031906), 2021-06-20
Supplement: f1 [file 1031906.f1.zip]

Supplementary Table S2. The Pearson correlation analysis of lncRNAs and ferroptosis regulators.

| Ferroptosis_gene | lncRNA      | pearson.cor | pvalue   |
|------------------|-------------|-------------|----------|
| ORAI1            | MIR4435-2HG | 0.515       | 5.40E-29 |
| ORAI1            | AC147651.3  | 0.518       | 2.26E-29 |
| ORAI1            | CYTOR       | 0.57        | 1.82E-36 |
| ATF3             | AC025259.3  | 0.536       | 1.01E-31 |
| ATM              | SAP30L-AS1  | 0.504       | 9.99E-28 |
| ATM              | BX322557.1  | 0.523       | 5.84E-30 |
| ATM              | AC024075.1  | 0.52        | 1.31E-29 |
| ATM              | ATP1B3-AS1  | 0.501       | 2.32E-27 |
| ATM              | AC118344.1  | 0.527       | 1.38E-30 |
| ATM              | AC067852.6  | 0.543       | 9.90E-33 |
| ATM              | AL161725.1  | 0.511       | 1.75E-28 |
| ATM              | PAXIP1-AS2  | 0.565       | 9.57E-36 |
| ATM              | AC108449.2  | 0.523       | 5.54E-30 |
| ATM              | AC053513.1  | 0.536       | 9.74E-32 |
| ATM              | AL049840.1  | 0.52        | 1.24E-29 |
| ATM              | AL132989.1  | 0.525       | 2.83E-30 |
| ATM              | AP003392.1  | 0.56        | 4.67E-35 |
| ATM              | Z68871.1    | 0.537       | 6.49E-32 |
| ATM              | AP000941.1  | 0.503       | 1.39E-27 |
| ATM              | AC138956.2  | 0.515       | 4.98E-29 |
| ATM              | AC108010.1  | 0.507       | 5.64E-28 |
| ATM              | NPTN-IT1    | 0.565       | 7.82E-36 |
| ATM              | AL133230.1  | 0.516       | 3.86E-29 |
| ATM              | AC000120.1  | 0.509       | 3.02E-28 |
| ATM              | AC012181.3  | 0.506       | 7.39E-28 |
| ATM              | AP000766.1  | 0.515       | 5.06E-29 |
| ATM              | AC253536.3  | 0.505       | 7.66E-28 |
| ATM              | AC004494.1  | 0.586       | 5.80E-39 |
| ZEB1             | AL450003.2  | 0.524       | 4.10E-30 |
| ZEB1             | AP001189.3  | 0.741       | 3.60E-72 |
| ZEB1             | AC087286.2  | 0.541       | 2.38E-32 |
| ZEB1             | AC079313.2  | 0.577       | 1.55E-37 |
| ZEB1             | AC037198.2  | 0.513       | 1.05E-28 |
| ZEB1             | AC135012.3  | 0.569       | 1.91E-36 |
| ZEB1             | AC129507.1  | 0.51        | 2.24E-28 |
| ZEB1             | AC036108.3  | 0.588       | 2.38E-39 |
| ZEB1             | LINC01235   | 0.525       | 3.02E-30 |
| ZEB1             | AC012085.2  | 0.509       | 2.70E-28 |
| ZEB1             | LINC01936   | 0.616       | 4.79E-44 |
| ZEB1             | AC005291.1  | 0.513       | 8.66E-29 |

|      |               |       |          |
|------|---------------|-------|----------|
| ZEB1 | MAGI2-AS3     | 0.72  | 2.85E-66 |
| ZEB1 | CARMN         | 0.62  | 1.02E-44 |
| ZEB1 | AL445423.1    | 0.501 | 2.52E-27 |
| ZEB1 | AC134312.5    | 0.51  | 2.40E-28 |
| ZEB1 | AC027097.2    | 0.51  | 2.35E-28 |
| ZEB1 | AC090825.1    | 0.644 | 3.02E-49 |
| ZEB1 | AL136084.3    | 0.709 | 1.25E-63 |
| ZEB1 | DNM3OS        | 0.61  | 6.50E-43 |
| ZEB1 | ADAMTS9-AS1   | 0.62  | 1.14E-44 |
| ZEB1 | CTD-2270F17.1 | 0.527 | 1.78E-30 |
| ZEB1 | AC005291.2    | 0.575 | 2.41E-37 |
| ZEB1 | MEF2C-AS1     | 0.554 | 3.86E-34 |
| ZEB1 | LINC01778     | 0.529 | 9.49E-31 |
| ZEB1 | AC104083.1    | 0.603 | 8.96E-42 |
| ZEB1 | AF001548.1    | 0.574 | 3.43E-37 |
| ZEB1 | AC002398.2    | 0.543 | 1.03E-32 |
| ZEB1 | AL662860.1    | 0.541 | 1.89E-32 |
| ZEB1 | AC079313.1    | 0.56  | 4.57E-35 |
| ZEB1 | AC108463.2    | 0.62  | 1.07E-44 |
| ZEB1 | AC131097.4    | 0.576 | 2.03E-37 |
| ZEB1 | AC092376.2    | 0.534 | 1.91E-31 |
| ZEB1 | AC053503.4    | 0.604 | 5.75E-42 |
| ZEB1 | AC027449.1    | 0.511 | 1.56E-28 |
| ZEB1 | AP001189.1    | 0.561 | 2.94E-35 |
| ZEB1 | AC005180.1    | 0.674 | 2.96E-55 |
| ZEB1 | MSC-AS1       | 0.58  | 4.79E-38 |
| ZEB1 | LINC01197     | 0.555 | 2.83E-34 |
| ZEB1 | AL109741.1    | 0.612 | 3.31E-43 |
| ZEB1 | FENDRR        | 0.644 | 4.53E-49 |
| ZEB1 | LINC02202     | 0.55  | 1.15E-33 |
| ZEB1 | AL133415.1    | 0.592 | 5.97E-40 |
| ZEB1 | AC116021.2    | 0.501 | 2.36E-27 |
| ZEB1 | C20orf166-AS1 | 0.555 | 2.16E-34 |
| ZEB1 | AP003071.4    | 0.698 | 8.67E-61 |
| ZEB1 | AL365214.2    | 0.525 | 2.76E-30 |
| ZEB1 | ADAMTS9-AS2   | 0.666 | 1.34E-53 |
| ZEB1 | AP001107.5    | 0.605 | 4.65E-42 |
| ZEB1 | AC087521.1    | 0.528 | 1.08E-30 |
| ZEB1 | AC093010.3    | 0.546 | 4.87E-33 |
| ZEB1 | AC079789.1    | 0.52  | 1.19E-29 |
| ZEB1 | AC007671.1    | 0.511 | 1.44E-28 |
| ZEB1 | AC013553.3    | 0.544 | 9.25E-33 |
| ZEB1 | LINC01081     | 0.59  | 1.10E-39 |
| ZEB1 | HAND2-AS1     | 0.656 | 1.72E-51 |

|         |             |         |           |
|---------|-------------|---------|-----------|
| ZEB1    | AC005180. 2 | 0. 675  | 1. 39E-55 |
| ZEB1    | AC092535. 4 | 0. 509  | 2. 50E-28 |
| ZEB1    | LINC00702   | 0. 591  | 9. 44E-40 |
| ZEB1    | AC009093. 2 | 0. 574  | 4. 00E-37 |
| ZEB1    | MBNL1-AS1   | 0. 62   | 1. 12E-44 |
| ZEB1    | MEG3        | 0. 532  | 3. 14E-31 |
| ZEB1    | SH3RF3-AS1  | 0. 649  | 3. 60E-50 |
| ZEB1    | AC099560. 1 | 0. 552  | 5. 74E-34 |
| ZEB1    | LINC01614   | 0. 595  | 2. 12E-40 |
| ZEB1    | AC093278. 2 | 0. 585  | 8. 69E-39 |
| ZEB1    | MIR100HG    | 0. 791  | 1. 47E-88 |
| ZEB1    | JAZF1-AS1   | 0. 544  | 9. 60E-33 |
| ZEB1    | AC090559. 1 | 0. 627  | 4. 75E-46 |
| ZEB1    | PCAT19      | 0. 506  | 7. 32E-28 |
| ZEB1    | AL139393. 2 | 0. 523  | 5. 55E-30 |
| ZEB1    | AC022893. 1 | 0. 512  | 1. 12E-28 |
| ZEB1    | AC009093. 1 | 0. 619  | 1. 41E-44 |
| ZEB1    | ACTA2-AS1   | 0. 702  | 8. 19E-62 |
| ZEB1    | AL031651. 2 | 0. 625  | 1. 54E-45 |
| ZEB1    | AP003071. 3 | 0. 55   | 1. 40E-33 |
| ZEB1    | LINC01352   | 0. 626  | 1. 03E-45 |
| ZEB1    | AC134312. 1 | 0. 522  | 7. 22E-30 |
| ZEB1    | AC079298. 3 | 0. 548  | 2. 17E-33 |
| ZEB1    | AC091588. 3 | 0. 51   | 1. 90E-28 |
| ZEB1    | BX322562. 1 | 0. 507  | 5. 63E-28 |
| ZEB1    | HLX-AS1     | 0. 515  | 5. 77E-29 |
| SLC38A1 | AC092611. 2 | 0. 523  | 5. 05E-30 |
| SLC38A1 | CYTOR       | -0. 519 | 1. 77E-29 |
| ABCC1   | TCF4-AS1    | 0. 507  | 4. 95E-28 |
| ABCC1   | LINC00942   | 0. 593  | 3. 52E-40 |
| ABCC1   | AL355303. 1 | 0. 574  | 4. 39E-37 |
| ABCC1   | AL033397. 1 | 0. 626  | 7. 60E-46 |
| ABCC1   | AP003119. 1 | 0. 536  | 1. 18E-31 |
| ABCC1   | AC145207. 8 | 0. 527  | 1. 35E-30 |
| IREB2   | AC024075. 1 | 0. 568  | 3. 39E-36 |
| IREB2   | AC005288. 1 | 0. 629  | 2. 85E-46 |
| IREB2   | AC008764. 2 | 0. 528  | 1. 07E-30 |
| IREB2   | OIP5-AS1    | 0. 634  | 2. 62E-47 |
| IREB2   | AC108449. 2 | 0. 567  | 3. 87E-36 |
| IREB2   | Z68871. 1   | 0. 592  | 6. 20E-40 |
| IREB2   | AC138035. 1 | 0. 51   | 2. 30E-28 |
| IREB2   | AC108010. 1 | 0. 629  | 2. 90E-46 |
| IREB2   | NPTN-IT1    | 0. 519  | 1. 44E-29 |
| IREB2   | AC015849. 3 | 0. 508  | 4. 20E-28 |

|       |             |       |          |
|-------|-------------|-------|----------|
| IREB2 | UBL7-AS1    | 0.6   | 3.44E-41 |
| IREB2 | AC135050.5  | 0.528 | 1.16E-30 |
| IREB2 | AC010834.3  | 0.528 | 1.31E-30 |
| TF    | AC027288.1  | 0.517 | 2.78E-29 |
| TF    | AC016550.3  | 0.504 | 1.20E-27 |
| TF    | AC022017.1  | 0.523 | 5.65E-30 |
| TF    | AC099520.1  | 0.51  | 1.97E-28 |
| TF    | AC083795.2  | 0.503 | 1.55E-27 |
| TF    | ZNF385D-AS2 | 0.505 | 8.98E-28 |
| TF    | LINC01289   | 0.524 | 3.53E-30 |
| TF    | AC083900.1  | 0.507 | 5.28E-28 |
| TF    | AL355674.1  | 0.512 | 1.14E-28 |
| TF    | AL139240.1  | 0.519 | 1.74E-29 |
| TF    | AL512366.1  | 0.534 | 1.90E-31 |
| TF    | AL358176.1  | 0.53  | 6.64E-31 |
| TF    | AP003715.1  | 0.509 | 3.02E-28 |
| TF    | FREM2-AS1   | 0.544 | 9.12E-33 |
| TF    | LINC01209   | 0.534 | 1.89E-31 |
| TF    | AC006150.1  | 0.508 | 3.65E-28 |
| TF    | AC092958.2  | 0.508 | 4.14E-28 |
| TF    | AC108721.1  | 0.507 | 5.38E-28 |
| TF    | AC093893.2  | 0.511 | 1.69E-28 |
| TF    | AC022367.1  | 0.543 | 1.01E-32 |
| TF    | AC004470.1  | 0.51  | 2.10E-28 |
| TF    | AL356022.1  | 0.502 | 2.07E-27 |
| TF    | AP001652.1  | 0.523 | 4.46E-30 |
| TF    | AL445430.1  | 0.52  | 1.07E-29 |
| TF    | AL353597.2  | 0.501 | 2.87E-27 |
| TF    | AL390243.1  | 0.502 | 2.10E-27 |
| TF    | LINC02355   | 0.506 | 7.49E-28 |
| TF    | AL691497.1  | 0.522 | 7.39E-30 |
| TF    | AC003984.1  | 0.505 | 9.53E-28 |
| TF    | AC073218.2  | 0.601 | 2.42E-41 |
| TF    | AL596330.1  | 0.514 | 7.29E-29 |
| TF    | AC099511.1  | 0.509 | 2.85E-28 |
| TF    | AC099520.2  | 0.522 | 6.96E-30 |
| LTF   | LINC00402   | 0.502 | 2.04E-27 |
| LTF   | AC009041.2  | 0.516 | 4.41E-29 |
| LTF   | UNQ6494     | 0.514 | 6.93E-29 |
| LTF   | LINC01781   | 0.55  | 1.07E-33 |
| LTF   | LINC02285   | 0.507 | 5.03E-28 |
| LTF   | LINC02384   | 0.549 | 1.52E-33 |
| LTF   | LINC01857   | 0.557 | 1.43E-34 |
| LTF   | FAM30A      | 0.552 | 6.64E-34 |

|      |             |        |           |
|------|-------------|--------|-----------|
| LTF  | AL365361. 1 | 0. 535 | 1. 31E-31 |
| LTF  | LINC02273   | 0. 504 | 1. 01E-27 |
| LTF  | LINC00861   | 0. 573 | 6. 06E-37 |
| LTF  | AC012645. 3 | 0. 508 | 4. 11E-28 |
| LTF  | PCED1B-AS1  | 0. 522 | 7. 21E-30 |
| LTF  | AC243960. 1 | 0. 566 | 6. 49E-36 |
| LTF  | AC119428. 2 | 0. 505 | 8. 38E-28 |
| LTF  | LINC00426   | 0. 549 | 1. 69E-33 |
| LTF  | LINC00494   | 0. 507 | 5. 42E-28 |
| LTF  | AC006369. 1 | 0. 517 | 3. 35E-29 |
| LTF  | ITGB2-AS1   | 0. 535 | 1. 32E-31 |
| LTF  | LINC02422   | 0. 557 | 1. 47E-34 |
| LTF  | AL928768. 1 | 0. 543 | 1. 07E-32 |
| LTF  | LINC01914   | 0. 507 | 4. 71E-28 |
| BRAF | AC004492. 1 | 0. 517 | 3. 28E-29 |
| BRAF | AC024937. 3 | 0. 53  | 7. 29E-31 |
| BRAF | USP3-AS1    | 0. 57  | 1. 53E-36 |
| BRAF | NADK2-AS1   | 0. 593 | 4. 12E-40 |
| BRAF | AC007622. 2 | 0. 51  | 2. 10E-28 |
| BRAF | MCCC1-AS1   | 0. 578 | 1. 10E-37 |
| BRAF | AC006378. 1 | 0. 503 | 1. 41E-27 |
| BRAF | GTF3C2-AS1  | 0. 549 | 1. 50E-33 |
| BRAF | AC092802. 2 | 0. 523 | 5. 81E-30 |
| BRAF | AP001094. 2 | 0. 501 | 2. 82E-27 |
| BRAF | LINC01873   | 0. 506 | 6. 56E-28 |
| BRAF | AC007390. 2 | 0. 575 | 3. 32E-37 |
| BRAF | AC120114. 2 | 0. 516 | 3. 43E-29 |
| BRAF | AC018682. 1 | 0. 533 | 2. 65E-31 |
| BRAF | AL606489. 1 | 0. 506 | 7. 10E-28 |
| BRAF | NCBP2-AS1   | 0. 532 | 3. 08E-31 |
| BRAF | ITPR1-AS1   | 0. 523 | 5. 05E-30 |
| BRAF | ZBTB40-IT1  | 0. 506 | 6. 86E-28 |
| BRAF | AL365436. 2 | 0. 517 | 2. 91E-29 |
| BRAF | AP001625. 2 | 0. 502 | 2. 13E-27 |
| BRAF | AGAP11      | 0. 509 | 2. 50E-28 |
| BRAF | AC0XL-AS1   | 0. 531 | 4. 76E-31 |
| BRAF | AL590652. 1 | 0. 527 | 1. 68E-30 |
| BRAF | AL135999. 3 | 0. 521 | 9. 15E-30 |
| BRAF | AP003392. 1 | 0. 511 | 1. 67E-28 |
| BRAF | AC009095. 1 | 0. 502 | 2. 13E-27 |
| BRAF | AC002064. 2 | 0. 508 | 3. 39E-28 |
| BRAF | AC008543. 3 | 0. 569 | 2. 14E-36 |
| BRAF | AL731566. 1 | 0. 544 | 7. 19E-33 |
| BRAF | ACAP2-IT1   | 0. 526 | 2. 14E-30 |

|        |             |        |          |
|--------|-------------|--------|----------|
| BRAF   | AC005586.1  | 0.508  | 4.29E-28 |
| BRAF   | AC078795.1  | 0.518  | 2.12E-29 |
| BRAF   | AC005746.1  | 0.512  | 1.18E-28 |
| BRAF   | AC108010.1  | 0.563  | 1.58E-35 |
| BRAF   | MIR4435-2HG | -0.505 | 7.58E-28 |
| BRAF   | AC109460.2  | 0.503  | 1.32E-27 |
| BRAF   | AC073957.3  | 0.512  | 1.16E-28 |
| BRAF   | SEMA6A-AS1  | 0.503  | 1.35E-27 |
| BRAF   | AC008770.4  | 0.522  | 6.67E-30 |
| BRAF   | AL450263.1  | 0.617  | 4.21E-44 |
| BRAF   | AL021068.1  | 0.56   | 4.22E-35 |
| BRAF   | AC002128.1  | 0.518  | 2.12E-29 |
| BRAF   | AC090198.1  | 0.541  | 2.11E-32 |
| BRAF   | AL391834.1  | 0.533  | 2.36E-31 |
| BRAF   | LINC01336   | 0.561  | 3.62E-35 |
| BRAF   | NDUFB2-AS1  | 0.545  | 5.26E-33 |
| BRAF   | AC000120.1  | 0.505  | 7.79E-28 |
| BRAF   | INE1        | 0.503  | 1.50E-27 |
| BRAF   | ZNF436-AS1  | 0.515  | 4.59E-29 |
| BRAF   | AC061975.7  | 0.621  | 6.11E-45 |
| BRAF   | AC098869.2  | 0.514  | 6.59E-29 |
| BRAF   | ZDHHC20-IT1 | 0.523  | 4.56E-30 |
| BRAF   | AC090739.1  | 0.51   | 2.31E-28 |
| BRAF   | AC025917.1  | 0.552  | 6.97E-34 |
| BRAF   | CYTOR       | -0.565 | 8.60E-36 |
| BRAF   | AL359220.1  | 0.549  | 1.83E-33 |
| BRAF   | SPAG5-AS1   | 0.514  | 7.47E-29 |
| BRAF   | AC073333.1  | 0.503  | 1.57E-27 |
| BRAF   | AC005253.1  | 0.504  | 1.27E-27 |
| BRAF   | AP000692.1  | 0.502  | 1.89E-27 |
| BRAF   | AC003681.1  | 0.512  | 1.08E-28 |
| BRAF   | AC104532.2  | 0.511  | 1.53E-28 |
| BRAF   | AC002128.2  | 0.506  | 7.31E-28 |
| BRAF   | AL157838.1  | 0.527  | 1.56E-30 |
| BRAF   | AC011477.3  | 0.541  | 2.16E-32 |
| BRAF   | AC007128.1  | 0.516  | 3.65E-29 |
| BRAF   | AL157786.1  | 0.549  | 1.48E-33 |
| BRAF   | AC093690.1  | 0.506  | 6.16E-28 |
| ALOXE3 | AL034376.2  | 0.509  | 3.25E-28 |
| CS     | AC099850.3  | 0.511  | 1.53E-28 |
| HILPDA | AC010655.2  | 0.668  | 5.43E-54 |
| LPCAT3 | AC005288.1  | 0.565  | 1.00E-35 |
| LPCAT3 | PLBD1-AS1   | 0.51   | 2.21E-28 |
| LPCAT3 | AC092611.2  | 0.52   | 1.23E-29 |

|        |             |         |           |
|--------|-------------|---------|-----------|
| LPCAT3 | AC108010. 1 | 0. 519  | 1. 57E-29 |
| LPCAT3 | AC016876. 2 | -0. 573 | 6. 01E-37 |
| LPCAT3 | AC012510. 1 | -0. 575 | 3. 12E-37 |
| MDM2   | AC025423. 1 | 0. 64   | 2. 03E-48 |
| MDM2   | AP001372. 1 | 0. 613  | 1. 61E-43 |
| PEBP1  | LINC00941   | -0. 503 | 1. 55E-27 |
| PEBP1  | AL158206. 1 | 0. 561  | 3. 58E-35 |
| PEBP1  | MYOSLID     | -0. 563 | 1. 58E-35 |
| PEBP1  | GATA3-AS1   | 0. 525  | 2. 83E-30 |
| PEBP1  | AL161772. 1 | 0. 537  | 7. 54E-32 |
| PEBP1  | AL135999. 3 | 0. 521  | 7. 90E-30 |
| PEBP1  | AC002384. 1 | -0. 519 | 1. 56E-29 |
| PEBP1  | DANCR       | 0. 504  | 1. 29E-27 |
| PEBP1  | CEBPA-AS1   | 0. 513  | 8. 80E-29 |
| PEBP1  | TBX2-AS1    | 0. 574  | 3. 83E-37 |
| PEBP1  | SNHG18      | 0. 523  | 4. 98E-30 |
| PEBP1  | AC061975. 7 | 0. 529  | 8. 63E-31 |
| PEBP1  | AP005432. 2 | 0. 581  | 3. 28E-38 |
| PEBP1  | AC011477. 3 | 0. 51   | 2. 26E-28 |
| PEBP1  | AC026765. 2 | 0. 501  | 2. 91E-27 |
| ATG13  | AC091544. 5 | -0. 504 | 9. 96E-28 |
| BECN1  | AC005288. 1 | 0. 704  | 2. 87E-62 |
| BECN1  | AC016876. 2 | -0. 529 | 8. 58E-31 |
| BECN1  | AC012510. 1 | -0. 52  | 1. 36E-29 |
| STAT3  | SNHG10      | -0. 522 | 7. 16E-30 |
| STAT3  | AL121829. 2 | -0. 514 | 6. 33E-29 |
| STAT3  | AL390294. 1 | -0. 507 | 4. 72E-28 |
| STAT3  | AC073534. 2 | -0. 502 | 1. 83E-27 |
| STAT3  | GATA3-AS1   | -0. 543 | 1. 03E-32 |
| STAT3  | AL450384. 2 | -0. 505 | 8. 23E-28 |
| STAT3  | AP000866. 5 | -0. 501 | 2. 60E-27 |
| STAT3  | HCP5        | 0. 546  | 4. 03E-33 |
| STAT3  | AP003352. 1 | -0. 518 | 2. 49E-29 |
| STAT3  | DANCR       | -0. 518 | 2. 50E-29 |
| STAT3  | SNHG9       | -0. 513 | 1. 01E-28 |
| STAT3  | TBX2-AS1    | -0. 549 | 1. 87E-33 |
| STAT3  | AC016876. 3 | -0. 501 | 2. 96E-27 |
| STAT3  | SNHG7       | -0. 507 | 5. 45E-28 |
| STAT3  | AC005785. 1 | -0. 501 | 2. 70E-27 |
| CTSB   | AC011899. 2 | 0. 554  | 3. 69E-34 |
| CTSB   | IQCH-AS1    | -0. 508 | 3. 65E-28 |
| CTSB   | AL109811. 3 | -0. 558 | 8. 17E-35 |
| CTSB   | LINC01094   | 0. 69   | 5. 68E-59 |
| CTSB   | AC006435. 2 | -0. 533 | 2. 69E-31 |

|      |             |         |           |
|------|-------------|---------|-----------|
| CTSB | AC004982. 1 | -0. 521 | 7. 96E-30 |
| CTSB | AL158206. 1 | -0. 543 | 1. 28E-32 |
| CTSB | AL390294. 1 | -0. 536 | 9. 94E-32 |
| CTSB | AC136475. 2 | 0. 515  | 4. 66E-29 |
| CTSB | PTOV1-AS2   | -0. 53  | 5. 88E-31 |
| CTSB | AC010761. 1 | -0. 512 | 1. 33E-28 |
| CTSB | AL359715. 3 | -0. 525 | 2. 77E-30 |
| CTSB | AC004921. 1 | 0. 556  | 2. 08E-34 |
| CTSB | AL023284. 4 | -0. 509 | 2. 87E-28 |
| CTSB | PAXIP1-AS1  | -0. 506 | 6. 14E-28 |
| CTSB | AL139287. 1 | -0. 52  | 1. 36E-29 |
| CTSB | AL133371. 2 | 0. 532  | 3. 11E-31 |
| CTSB | GATA3-AS1   | -0. 57  | 1. 48E-36 |
| CTSB | AL450384. 2 | -0. 527 | 1. 67E-30 |
| CTSB | AC004148. 2 | -0. 578 | 9. 59E-38 |
| CTSB | AL590652. 1 | -0. 505 | 8. 74E-28 |
| CTSB | SH3BP5-AS1  | -0. 535 | 1. 51E-31 |
| CTSB | AL022322. 1 | -0. 532 | 3. 75E-31 |
| CTSB | LINC01355   | -0. 506 | 6. 95E-28 |
| CTSB | AC099066. 2 | 0. 533  | 2. 43E-31 |
| CTSB | AC074327. 1 | 0. 512  | 1. 24E-28 |
| CTSB | AC017002. 3 | 0. 513  | 9. 70E-29 |
| CTSB | AL691482. 3 | -0. 536 | 1. 05E-31 |
| CTSB | SMIM25      | 0. 695  | 3. 10E-60 |
| CTSB | AC006042. 1 | -0. 567 | 4. 10E-36 |
| CTSB | AL390719. 2 | -0. 596 | 1. 56E-40 |
| CTSB | AL133410. 1 | -0. 52  | 1. 34E-29 |
| CTSB | LINC01943   | 0. 571  | 1. 18E-36 |
| CTSB | MIR4435-2HG | 0. 594  | 3. 16E-40 |
| CTSB | PRKCZ-AS1   | -0. 506 | 6. 41E-28 |
| CTSB | VIM-AS1     | 0. 51   | 1. 97E-28 |
| CTSB | AC147651. 3 | 0. 595  | 1. 75E-40 |
| CTSB | AC108860. 2 | -0. 537 | 8. 13E-32 |
| CTSB | AC108134. 1 | -0. 508 | 3. 76E-28 |
| CTSB | AL671710. 1 | -0. 501 | 2. 30E-27 |
| CTSB | AC016738. 1 | -0. 502 | 1. 96E-27 |
| CTSB | TTC28-AS1   | -0. 507 | 5. 49E-28 |
| CTSB | AL359715. 2 | -0. 538 | 6. 20E-32 |
| CTSB | ZNF436-AS1  | -0. 585 | 7. 83E-39 |
| CTSB | AC073335. 2 | -0. 55  | 1. 06E-33 |
| CTSB | KRT7-AS     | -0. 525 | 2. 89E-30 |
| CTSB | AC061975. 7 | -0. 522 | 7. 55E-30 |
| CTSB | MCF2L-AS1   | -0. 54  | 2. 65E-32 |
| CTSB | AC084125. 2 | -0. 511 | 1. 72E-28 |



|         |             |         |            |
|---------|-------------|---------|------------|
| CTSB    | AC004982. 2 | -0. 521 | 9. 35E-30  |
| CTSB    | CYTOR       | 0. 613  | 2. 12E-43  |
| CTSB    | ZNF32-AS1   | -0. 567 | 3. 90E-36  |
| CTSB    | AC006033. 2 | 0. 532  | 3. 27E-31  |
| CTSB    | AC091544. 5 | -0. 537 | 6. 86E-32  |
| CTSB    | AC090559. 1 | 0. 574  | 3. 84E-37  |
| CTSB    | AC107068. 1 | -0. 523 | 4. 56E-30  |
| CTSB    | GAPLINC     | 0. 515  | 5. 65E-29  |
| CTSB    | AC003070. 1 | -0. 51  | 2. 10E-28  |
| CTSB    | AC011477. 3 | -0. 583 | 1. 37E-38  |
| CTSB    | AC010503. 4 | -0. 519 | 1. 74E-29  |
| CTSB    | TUG1        | -0. 513 | 1. 02E-28  |
| CDKN2A  | CDKN2B-AS1  | 0. 633  | 5. 09E-47  |
| CDKN2A  | LINC00294   | 0. 502  | 1. 76E-27  |
| CDKN2A  | AL449423. 1 | 0. 665  | 1. 97E-53  |
| CDKN2A  | CDKN2A-AS1  | 0. 745  | 2. 05E-73  |
| EIF2AK2 | AC099850. 3 | 0. 509  | 3. 07E-28  |
| EIF2AK2 | SNHG9       | -0. 535 | 1. 25E-31  |
| EIF2AK2 | AP001610. 1 | 0. 567  | 4. 66E-36  |
| EIF2AK2 | AL445490. 1 | 0. 55   | 1. 43E-33  |
| EIF2AK2 | AC009950. 1 | 0. 502  | 1. 97E-27  |
| KEAP1   | AC114271. 1 | 0. 544  | 8. 94E-33  |
| CYBB    | U62317. 5   | 0. 567  | 4. 36E-36  |
| CYBB    | AC034238. 1 | 0. 565  | 9. 33E-36  |
| CYBB    | AL035530. 1 | 0. 509  | 2. 53E-28  |
| CYBB    | AC004865. 2 | 0. 671  | 1. 22E-54  |
| CYBB    | AF127936. 1 | 0. 701  | 1. 27E-61  |
| CYBB    | LINC01684   | 0. 53   | 6. 40E-31  |
| CYBB    | LINC02446   | 0. 617  | 4. 45E-44  |
| CYBB    | AC079921. 2 | 0. 557  | 1. 44E-34  |
| CYBB    | AC034199. 1 | 0. 585  | 6. 63E-39  |
| CYBB    | AC011899. 2 | 0. 806  | 1. 64E-94  |
| CYBB    | AC007569. 1 | 0. 529  | 7. 40E-31  |
| CYBB    | ZEB2-AS1    | 0. 582  | 2. 67E-38  |
| CYBB    | AL133467. 1 | 0. 547  | 3. 16E-33  |
| CYBB    | LINC01094   | 0. 843  | 1. 71E-111 |
| CYBB    | AC021188. 1 | 0. 576  | 2. 33E-37  |
| CYBB    | AC004687. 1 | 0. 542  | 1. 68E-32  |
| CYBB    | LINC02345   | 0. 605  | 3. 80E-42  |
| CYBB    | CARD8-AS1   | 0. 565  | 7. 72E-36  |
| CYBB    | AC136475. 2 | 0. 56   | 5. 20E-35  |
| CYBB    | AL590764. 1 | 0. 73   | 4. 84E-69  |
| CYBB    | AC243960. 3 | 0. 527  | 1. 46E-30  |
| CYBB    | AC004921. 1 | 0. 747  | 6. 71E-74  |

|      |             |        |          |
|------|-------------|--------|----------|
| CYBB | MIR155HG    | 0.693  | 1.10E-59 |
| CYBB | AP003774.4  | 0.508  | 3.26E-28 |
| CYBB | PIK3CD-AS1  | 0.538  | 5.86E-32 |
| CYBB | AC015819.1  | 0.637  | 8.91E-48 |
| CYBB | AC109446.3  | 0.51   | 2.25E-28 |
| CYBB | AL023284.4  | -0.553 | 4.49E-34 |
| CYBB | U62317.2    | 0.526  | 1.87E-30 |
| CYBB | LINC01150   | 0.654  | 3.74E-51 |
| CYBB | LINC02285   | 0.717  | 1.11E-65 |
| CYBB | AC023449.2  | 0.522  | 6.51E-30 |
| CYBB | AC011899.3  | 0.708  | 3.04E-63 |
| CYBB | AC245128.3  | 0.554  | 2.91E-34 |
| CYBB | AL133371.2  | 0.774  | 1.41E-82 |
| CYBB | GATA3-AS1   | -0.52  | 1.38E-29 |
| CYBB | AC012236.1  | 0.517  | 3.32E-29 |
| CYBB | LINC01857   | 0.586  | 6.36E-39 |
| CYBB | AL162414.1  | 0.534  | 1.77E-31 |
| CYBB | AL365361.1  | 0.648  | 7.40E-50 |
| CYBB | AC064805.1  | 0.503  | 1.60E-27 |
| CYBB | AC074327.1  | 0.579  | 5.78E-38 |
| CYBB | AC017002.3  | 0.629  | 2.28E-46 |
| CYBB | LINC00996   | 0.718  | 6.30E-66 |
| CYBB | TMEM51-AS1  | -0.507 | 5.18E-28 |
| CYBB | SMIM25      | 0.81   | 2.67E-96 |
| CYBB | LINC02084   | 0.575  | 2.74E-37 |
| CYBB | LINC00861   | 0.586  | 5.03E-39 |
| CYBB | AP002954.1  | 0.639  | 2.92E-48 |
| CYBB | LINC02362   | 0.516  | 3.41E-29 |
| CYBB | F0393401.1  | 0.542  | 1.35E-32 |
| CYBB | AC004988.1  | 0.589  | 2.09E-39 |
| CYBB | AL390719.2  | -0.563 | 1.79E-35 |
| CYBB | AC145098.1  | 0.577  | 1.52E-37 |
| CYBB | HCP5        | 0.527  | 1.68E-30 |
| CYBB | L3MBTL4-AS1 | 0.673  | 4.54E-55 |
| CYBB | TRG-AS1     | 0.777  | 1.37E-83 |
| CYBB | LINC01678   | 0.603  | 1.06E-41 |
| CYBB | LINC01943   | 0.755  | 2.77E-76 |
| CYBB | MIR4435-2HG | 0.508  | 3.52E-28 |
| CYBB | AL034397.3  | 0.578  | 8.57E-38 |
| CYBB | AC022126.1  | 0.537  | 6.85E-32 |
| CYBB | LINC01506   | 0.554  | 3.31E-34 |
| CYBB | VIM-AS1     | 0.611  | 4.09E-43 |
| CYBB | AC147651.3  | 0.747  | 5.89E-74 |
| CYBB | LINC02325   | 0.575  | 2.58E-37 |

|      |              |        |           |
|------|--------------|--------|-----------|
| CYBB | PCED1B-AS1   | 0.79   | 4.16E-88  |
| CYBB | AC243960.1   | 0.635  | 1.67E-47  |
| CYBB | AC004847.1   | 0.636  | 1.32E-47  |
| CYBB | AC243829.4   | 0.641  | 1.40E-48  |
| CYBB | AC138207.5   | 0.727  | 3.32E-68  |
| CYBB | LINC00528    | 0.55   | 1.22E-33  |
| CYBB | AL354732.1   | 0.537  | 8.37E-32  |
| CYBB | TRBV11-2     | 0.602  | 1.54E-41  |
| CYBB | USP30-AS1    | 0.636  | 1.33E-47  |
| CYBB | LINC01934    | 0.62   | 1.23E-44  |
| CYBB | AC008105.3   | 0.588  | 2.45E-39  |
| CYBB | LINC00426    | 0.689  | 1.23E-58  |
| CYBB | AL161935.3   | 0.624  | 1.99E-45  |
| CYBB | LINC02195    | 0.632  | 6.65E-47  |
| CYBB | AC004585.1   | 0.638  | 5.86E-48  |
| CYBB | PSMB8-AS1    | 0.648  | 6.70E-50  |
| CYBB | AC069209.1   | 0.604  | 5.78E-42  |
| CYBB | AC007728.2   | 0.623  | 2.57E-45  |
| CYBB | AL592164.1   | 0.548  | 2.56E-33  |
| CYBB | AL590648.3   | 0.502  | 2.14E-27  |
| CYBB | C9orf139     | 0.603  | 1.12E-41  |
| CYBB | AC083949.1   | 0.628  | 4.47E-46  |
| CYBB | AC006369.1   | 0.584  | 1.13E-38  |
| CYBB | LINC01614    | 0.519  | 1.63E-29  |
| CYBB | CYTOR        | 0.567  | 4.59E-36  |
| CYBB | ITGB2-AS1    | 0.674  | 2.52E-55  |
| CYBB | MMP2-AS1     | 0.509  | 2.88E-28  |
| CYBB | AC006033.2   | 0.768  | 1.73E-80  |
| CYBB | AL591468.1   | 0.663  | 4.35E-53  |
| CYBB | AC091544.5   | -0.51  | 1.87E-28  |
| CYBB | AC090559.1   | 0.841  | 2.02E-110 |
| CYBB | LINC01914    | 0.53   | 5.84E-31  |
| CYBB | LINC01871    | 0.706  | 6.62E-63  |
| CYBB | AL390036.1   | 0.568  | 3.03E-36  |
| CYBB | LINC02099    | 0.539  | 4.40E-32  |
| CYBB | AL023653.1   | 0.504  | 1.26E-27  |
| CYBB | HLA-DQB1-AS1 | 0.652  | 8.88E-51  |
| CYBB | GAPLINC      | 0.514  | 6.02E-29  |
| CYBB | AC110995.1   | 0.507  | 5.02E-28  |
| CYBB | AC015911.3   | 0.682  | 4.55E-57  |
| CYBB | AC008750.1   | 0.501  | 2.79E-27  |
| CYBB | LINC01281    | 0.58   | 4.75E-38  |
| CYBB | AC010503.4   | -0.506 | 6.16E-28  |
| CYBB | AC109826.1   | 0.678  | 3.01E-56  |

|        |            |       |          |
|--------|------------|-------|----------|
| DPP4   | LINC01094  | 0.517 | 2.85E-29 |
| DPP4   | AC008063.1 | 0.741 | 2.35E-72 |
| HDDC3  | AC068338.2 | 0.577 | 1.46E-37 |
| HDDC3  | AC023509.4 | 0.522 | 6.62E-30 |
| HDDC3  | AC068831.2 | 0.503 | 1.32E-27 |
| NOX4   | LINC01638  | 0.556 | 1.57E-34 |
| NOX4   | AC090125.1 | 0.548 | 2.11E-33 |
| NOX4   | AC027288.3 | 0.559 | 6.91E-35 |
| NOX4   | MAGI2-AS3  | 0.514 | 6.14E-29 |
| NOX4   | AC134312.5 | 0.62  | 1.14E-44 |
| NOX4   | LINC02104  | 0.559 | 6.54E-35 |
| NOX4   | LINC01050  | 0.517 | 2.67E-29 |
| NOX4   | AC104083.1 | 0.508 | 3.46E-28 |
| NOX4   | AC108463.2 | 0.533 | 2.84E-31 |
| NOX4   | AL136129.1 | 0.684 | 1.12E-57 |
| NOX4   | LINC01048  | 0.539 | 4.25E-32 |
| NOX4   | AC090673.1 | 0.545 | 6.66E-33 |
| NOX4   | LINC01943  | 0.53  | 5.56E-31 |
| NOX4   | LINC01705  | 0.571 | 1.08E-36 |
| NOX4   | FNDC1-IT1  | 0.538 | 4.76E-32 |
| NOX4   | AL354732.1 | 0.645 | 2.18E-49 |
| NOX4   | AC009093.2 | 0.634 | 2.47E-47 |
| NOX4   | AC004160.1 | 0.521 | 8.01E-30 |
| NOX4   | AL356417.2 | 0.705 | 1.63E-62 |
| NOX4   | LINC01614  | 0.655 | 2.41E-51 |
| NOX4   | CYTOR      | 0.507 | 5.00E-28 |
| NOX4   | AC007750.1 | 0.629 | 2.16E-46 |
| NOX4   | LINC01561  | 0.579 | 6.51E-38 |
| NOX4   | AC009093.1 | 0.643 | 5.29E-49 |
| NOX4   | GAPLINC    | 0.63  | 1.98E-46 |
| NOX4   | AL031651.2 | 0.518 | 2.37E-29 |
| NOX4   | AL162457.2 | 0.579 | 5.88E-38 |
| NOX4   | AC079298.3 | 0.556 | 1.52E-34 |
| AKR1C1 | TCF4-AS1   | 0.513 | 8.23E-29 |
| AKR1C1 | AL391427.1 | 0.675 | 1.23E-55 |
| AKR1C1 | AL355303.1 | 0.573 | 5.30E-37 |
| AKR1C1 | AL033397.1 | 0.591 | 7.58E-40 |
| AKR1C1 | AC005722.3 | 0.546 | 4.78E-33 |
| AKR1C1 | AP003119.1 | 0.544 | 9.65E-33 |
| AKR1C2 | LINC01564  | 0.576 | 2.01E-37 |
| AKR1C2 | AL391427.1 | 0.749 | 1.28E-74 |
| AKR1C2 | TP53TG1    | 0.527 | 1.73E-30 |
| AKR1C3 | LINC01564  | 0.516 | 3.91E-29 |
| AKR1C3 | COLCA1     | 0.513 | 9.23E-29 |

|        |              |         |           |
|--------|--------------|---------|-----------|
| AKR1C3 | AL391427. 1  | 0. 707  | 4. 13E-63 |
| CDH1   | ZEB2-AS1     | -0. 501 | 2. 47E-27 |
| CDH1   | SPINT1-AS1   | 0. 529  | 8. 35E-31 |
| CDH1   | AL035661. 1  | 0. 566  | 7. 30E-36 |
| CDH1   | AC010503. 4  | 0. 534  | 1. 80E-31 |
| ITGA6  | AC078883. 1  | 0. 548  | 2. 20E-33 |
| ITGB4  | AC245041. 3  | 0. 533  | 2. 72E-31 |
| ITGB4  | MIR205HG     | 0. 562  | 2. 12E-35 |
| CD44   | AL133330. 1  | 0. 663  | 4. 28E-53 |
| CD44   | AC080129. 2  | -0. 53  | 7. 07E-31 |
| CD44   | LINC00941    | 0. 617  | 3. 06E-44 |
| CD44   | AL121829. 2  | -0. 514 | 6. 06E-29 |
| CD44   | AC004982. 1  | -0. 545 | 6. 25E-33 |
| CD44   | AL158206. 1  | -0. 561 | 2. 99E-35 |
| CD44   | AC108112. 1  | -0. 501 | 2. 85E-27 |
| CD44   | AP000866. 2  | -0. 511 | 1. 63E-28 |
| CD44   | AL390294. 1  | -0. 51  | 2. 29E-28 |
| CD44   | MYOSLID      | 0. 606  | 3. 54E-42 |
| CD44   | LINC01833    | -0. 513 | 8. 69E-29 |
| CD44   | PAXIP1-AS1   | -0. 532 | 3. 96E-31 |
| CD44   | FAM83A-AS1   | 0. 501  | 2. 44E-27 |
| CD44   | AC012615. 1  | -0. 525 | 3. 07E-30 |
| CD44   | AC104825. 3  | -0. 508 | 4. 17E-28 |
| CD44   | AL358075. 2  | -0. 504 | 1. 02E-27 |
| CD44   | GATA3-AS1    | -0. 574 | 3. 49E-37 |
| CD44   | LINC01534    | -0. 506 | 7. 03E-28 |
| CD44   | AP000866. 5  | -0. 534 | 1. 72E-31 |
| CD44   | AL135999. 3  | -0. 586 | 5. 50E-39 |
| CD44   | LINC01213    | -0. 518 | 2. 00E-29 |
| CD44   | LINC00460    | 0. 509  | 3. 05E-28 |
| CD44   | AL691482. 3  | -0. 518 | 2. 49E-29 |
| CD44   | Z73429. 1    | -0. 512 | 1. 29E-28 |
| CD44   | AC006042. 1  | -0. 539 | 4. 11E-32 |
| CD44   | AL390719. 2  | -0. 516 | 4. 30E-29 |
| CD44   | AC002384. 1  | 0. 518  | 2. 31E-29 |
| CD44   | CEBPA-AS1    | -0. 528 | 1. 17E-30 |
| CD44   | AC108860. 2  | -0. 575 | 3. 12E-37 |
| CD44   | AC108134. 1  | -0. 503 | 1. 56E-27 |
| CD44   | ELF3-AS1     | -0. 537 | 7. 09E-32 |
| CD44   | TBX2-AS1     | -0. 575 | 3. 31E-37 |
| CD44   | SH3PXD2A-AS1 | 0. 525  | 2. 94E-30 |
| CD44   | AL365356. 5  | 0. 557  | 1. 11E-34 |
| CD44   | SCOC-AS1     | -0. 51  | 1. 87E-28 |
| CD44   | AC061975. 7  | -0. 516 | 3. 81E-29 |

|         |             |        |          |
|---------|-------------|--------|----------|
| CD44    | LINC02081   | 0.53   | 6.49E-31 |
| CD44    | MCF2L-AS1   | -0.577 | 1.51E-37 |
| CD44    | OSER1-AS1   | -0.538 | 6.15E-32 |
| CD44    | AL355353.1  | -0.532 | 3.88E-31 |
| CD44    | AC004982.2  | -0.546 | 5.09E-33 |
| CD44    | AC008738.2  | -0.503 | 1.67E-27 |
| CD44    | AL356215.1  | 0.599  | 4.37E-41 |
| CD44    | AC011477.3  | -0.564 | 1.10E-35 |
| CD44    | CD44-AS1    | 0.715  | 5.37E-65 |
| OTUB1   | AP003068.1  | 0.537  | 8.62E-32 |
| SLC7A11 | AC105177.1  | 0.522  | 7.75E-30 |
| SLC7A11 | AC004990.1  | 0.54   | 2.96E-32 |
| SLC7A11 | AC078845.1  | 0.51   | 1.86E-28 |
| SLC7A11 | TCF4-AS1    | 0.564  | 1.17E-35 |
| SLC7A11 | LINC00536   | 0.508  | 4.09E-28 |
| SLC7A11 | AL596223.1  | 0.656  | 1.82E-51 |
| SLC7A11 | AP001596.1  | 0.574  | 3.96E-37 |
| SLC7A11 | LINC00942   | 0.682  | 5.08E-57 |
| SLC7A11 | AL355303.1  | 0.705  | 1.85E-62 |
| SLC7A11 | AL033397.1  | 0.777  | 1.85E-83 |
| SLC7A11 | SLC7A11-AS1 | 0.558  | 1.05E-34 |
| SLC7A11 | AC089983.1  | 0.501  | 2.74E-27 |
| SLC7A11 | AC005722.3  | 0.587  | 3.91E-39 |
| SLC7A11 | AP003119.1  | 0.65   | 2.48E-50 |
| SLC7A11 | AC145207.8  | 0.602  | 1.45E-41 |
| FANCD2  | AC099850.3  | 0.522  | 7.59E-30 |
| FANCD2  | THUMPD3-AS1 | 0.539  | 4.30E-32 |
| TFAM    | AC005288.1  | 0.516  | 4.09E-29 |
| TFAM    | AL731577.2  | 0.504  | 1.00E-27 |
| HSPA5   | AC010487.2  | -0.545 | 5.70E-33 |
| HSPA5   | AL023284.4  | -0.508 | 3.80E-28 |
| HSPA5   | AL450384.2  | -0.529 | 9.57E-31 |
| HSPA5   | TMEM51-AS1  | -0.514 | 7.87E-29 |
| HSPA5   | AL390719.2  | -0.506 | 6.02E-28 |
| HSPA5   | AC005785.1  | -0.514 | 6.25E-29 |
| HSPA5   | AC013489.1  | -0.504 | 1.05E-27 |
| HSPA5   | AC078880.3  | -0.539 | 4.04E-32 |
| HSPA5   | AC010300.1  | -0.518 | 2.16E-29 |
| GCLC    | AL033397.2  | 0.742  | 1.94E-72 |
| GCLC    | LINC01564   | 0.628  | 3.82E-46 |
| GCLC    | AC145207.8  | 0.531  | 4.16E-31 |
| CISD1   | AL158206.1  | -0.529 | 7.36E-31 |
| CISD1   | AL691482.3  | -0.511 | 1.48E-28 |
| CISD1   | AC108134.1  | -0.512 | 1.25E-28 |

|       |             |         |           |
|-------|-------------|---------|-----------|
| CISD1 | AC010761. 4 | -0. 506 | 5. 87E-28 |
| CISD1 | ZNF436-AS1  | -0. 501 | 2. 43E-27 |
| CISD1 | AC073335. 2 | -0. 531 | 5. 14E-31 |
| CISD1 | KRT7-AS     | -0. 504 | 1. 10E-27 |
| CISD1 | AC003070. 1 | -0. 51  | 2. 29E-28 |
| FTMT  | AL357127. 1 | 0. 505  | 8. 26E-28 |
| FTMT  | AL589642. 1 | 0. 731  | 2. 02E-69 |
| FTMT  | AC116616. 1 | 0. 617  | 4. 40E-44 |
| HSPB1 | TP53TG1     | 0. 511  | 1. 81E-28 |
| PROM2 | AP002761. 4 | 0. 53   | 5. 52E-31 |
| PROM2 | MIR205HG    | 0. 505  | 8. 76E-28 |
| HIF1A | LINC01089   | -0. 501 | 2. 56E-27 |
| HIF1A | AL121829. 2 | -0. 518 | 2. 45E-29 |
| HIF1A | AC108673. 3 | -0. 501 | 2. 27E-27 |
| HIF1A | AC024060. 1 | -0. 573 | 6. 27E-37 |
| HIF1A | GATA3-AS1   | -0. 519 | 1. 67E-29 |
| HIF1A | AP000866. 5 | -0. 508 | 3. 55E-28 |
| HIF1A | HIFX-AS1    | -0. 511 | 1. 56E-28 |
| HIF1A | AC008105. 2 | -0. 551 | 9. 77E-34 |
| HIF1A | AL390719. 2 | -0. 524 | 4. 12E-30 |
| HIF1A | AC015912. 3 | -0. 509 | 2. 91E-28 |
| HIF1A | TBX2-AS1    | -0. 542 | 1. 62E-32 |
| HIF1A | SCOC-AS1    | -0. 512 | 1. 12E-28 |
| HIF1A | AC092849. 1 | -0. 524 | 3. 77E-30 |
| HIF1A | C17orf82    | -0. 515 | 5. 27E-29 |
| HIF1A | OSER1-AS1   | -0. 504 | 1. 04E-27 |
| HIF1A | AL355353. 1 | -0. 533 | 2. 73E-31 |
| HIF1A | KMT2E-AS1   | -0. 502 | 2. 11E-27 |
| HIF1A | AC010331. 1 | -0. 546 | 4. 85E-33 |
| HIF1A | AP000553. 1 | -0. 511 | 1. 42E-28 |
| HIF1A | HIF1A-AS1   | 0. 522  | 7. 36E-30 |
| HIF1A | AC073896. 4 | -0. 515 | 4. 57E-29 |
| HIF1A | AC009065. 4 | -0. 567 | 4. 36E-36 |
| TPD52 | AC009686. 2 | 0. 542  | 1. 55E-32 |
| VHL   | AC005288. 1 | 0. 504  | 1. 03E-27 |
| VHL   | FGD5-AS1    | 0. 707  | 5. 26E-63 |
| VHL   | THUMPD3-AS1 | 0. 58   | 5. 64E-38 |
| VHL   | NORAD       | 0. 511  | 1. 56E-28 |
| VHL   | AC018809. 2 | 0. 562  | 2. 13E-35 |
| VHL   | AC060780. 1 | 0. 514  | 5. 99E-29 |
| VHL   | MAP3K14-AS1 | 0. 503  | 1. 67E-27 |
| VHL   | AC011477. 3 | 0. 516  | 3. 65E-29 |
| CHMP5 | EBLN3P      | 0. 532  | 3. 84E-31 |
| MT1G  | LINC01094   | 0. 514  | 5. 98E-29 |

|       |             |        |          |
|-------|-------------|--------|----------|
| MT1G  | SMIM25      | 0.551  | 9.57E-34 |
| MT1G  | MIR4435-2HG | 0.507  | 5.48E-28 |
| NQO1  | AC092115.3  | 0.539  | 4.33E-32 |
| PRDX6 | TMEM51-AS1  | -0.517 | 2.94E-29 |
| CAV1  | IQCH-AS1    | -0.533 | 2.35E-31 |
| CAV1  | LINC00941   | 0.539  | 3.59E-32 |
| CAV1  | AL121829.2  | -0.506 | 7.45E-28 |
| CAV1  | LINC01094   | 0.503  | 1.43E-27 |
| CAV1  | AL390294.1  | -0.536 | 9.84E-32 |
| CAV1  | RASAL2-AS1  | 0.508  | 3.50E-28 |
| CAV1  | AC012467.2  | -0.505 | 9.90E-28 |
| CAV1  | MYOSLID     | 0.53   | 6.59E-31 |
| CAV1  | AL023284.4  | -0.573 | 5.11E-37 |
| CAV1  | SLC16A1-AS1 | 0.532  | 3.15E-31 |
| CAV1  | SPINT1-AS1  | -0.522 | 7.18E-30 |
| CAV1  | GATA3-AS1   | -0.535 | 1.34E-31 |
| CAV1  | AC002066.1  | 0.537  | 7.11E-32 |
| CAV1  | AC004148.2  | -0.508 | 4.16E-28 |
| CAV1  | AL590428.1  | 0.503  | 1.55E-27 |
| CAV1  | TMEM51-AS1  | -0.546 | 5.14E-33 |
| CAV1  | AL691482.3  | -0.56  | 5.14E-35 |
| CAV1  | AL390719.2  | -0.604 | 6.12E-42 |
| CAV1  | RNF157-AS1  | -0.503 | 1.55E-27 |
| CAV1  | AC020663.2  | -0.507 | 5.50E-28 |
| CAV1  | AC002384.1  | 0.532  | 3.29E-31 |
| CAV1  | MIR4435-2HG | 0.641  | 1.61E-48 |
| CAV1  | DANCR       | -0.528 | 1.25E-30 |
| CAV1  | AC108134.1  | -0.511 | 1.51E-28 |
| CAV1  | AATBC       | -0.534 | 2.10E-31 |
| CAV1  | NKILA       | 0.501  | 2.87E-27 |
| CAV1  | AL161431.1  | 0.577  | 1.45E-37 |
| CAV1  | PICSAR      | 0.556  | 1.75E-34 |
| CAV1  | AC099676.1  | -0.506 | 5.86E-28 |
| CAV1  | LINC01615   | 0.551  | 9.23E-34 |
| CAV1  | MCF2L-AS1   | -0.576 | 1.94E-37 |
| CAV1  | CYTOR       | 0.646  | 1.32E-49 |
| CAV1  | AC007750.1  | 0.51   | 2.09E-28 |
| CAV1  | AL035661.1  | -0.524 | 3.45E-30 |
| CAV1  | AC011477.3  | -0.537 | 7.73E-32 |
| CAV1  | AC010503.4  | -0.542 | 1.37E-32 |
| MDM4  | AC011477.2  | 0.518  | 2.11E-29 |
| MDM4  | AC009107.2  | 0.583  | 1.94E-38 |
| MDM4  | AC016747.3  | 0.59   | 1.31E-39 |
| MDM4  | AC004492.1  | 0.524  | 4.17E-30 |



|      |             |        |           |
|------|-------------|--------|-----------|
| MDM4 | AC093535. 1 | 0. 52  | 1. 32E-29 |
| MDM4 | AP003170. 3 | 0. 526 | 1. 92E-30 |
| MDM4 | AL021878. 2 | 0. 53  | 6. 28E-31 |
| MDM4 | AC008555. 2 | 0. 503 | 1. 35E-27 |
| MDM4 | AL008582. 1 | 0. 509 | 2. 97E-28 |
| MDM4 | AC024937. 3 | 0. 607 | 1. 72E-42 |
| MDM4 | LINC01089   | 0. 508 | 3. 44E-28 |
| MDM4 | AC007216. 4 | 0. 55  | 1. 30E-33 |
| MDM4 | USP3-AS1    | 0. 579 | 6. 59E-38 |
| MDM4 | AC009690. 2 | 0. 529 | 7. 76E-31 |
| MDM4 | AL096870. 2 | 0. 559 | 5. 96E-35 |
| MDM4 | AL031670. 1 | 0. 519 | 1. 70E-29 |
| MDM4 | AC009996. 1 | 0. 531 | 4. 27E-31 |
| MDM4 | AC024361. 1 | 0. 501 | 2. 78E-27 |
| MDM4 | TAPT1-AS1   | 0. 53  | 5. 56E-31 |
| MDM4 | EDRF1-AS1   | 0. 629 | 2. 29E-46 |
| MDM4 | AC008760. 1 | 0. 506 | 6. 70E-28 |
| MDM4 | LINC00893   | 0. 584 | 1. 31E-38 |
| MDM4 | AC007622. 2 | 0. 534 | 1. 81E-31 |
| MDM4 | AL158163. 1 | 0. 611 | 3. 74E-43 |
| MDM4 | MCCC1-AS1   | 0. 576 | 1. 92E-37 |
| MDM4 | AL157392. 3 | 0. 597 | 1. 05E-40 |
| MDM4 | AL109811. 3 | 0. 574 | 4. 45E-37 |
| MDM4 | IGBP1-AS1   | 0. 642 | 8. 28E-49 |
| MDM4 | AC087741. 1 | 0. 521 | 8. 76E-30 |
| MDM4 | AC006435. 2 | 0. 631 | 1. 08E-46 |
| MDM4 | AL031846. 2 | 0. 577 | 1. 32E-37 |
| MDM4 | AL450998. 3 | 0. 58  | 4. 46E-38 |
| MDM4 | AC015813. 1 | 0. 539 | 3. 83E-32 |
| MDM4 | AL512770. 1 | 0. 641 | 1. 24E-48 |
| MDM4 | AL031709. 1 | 0. 578 | 1. 07E-37 |
| MDM4 | AC024075. 1 | 0. 538 | 4. 77E-32 |
| MDM4 | AL353622. 1 | 0. 509 | 2. 51E-28 |
| MDM4 | GMDS-AS1    | 0. 533 | 2. 35E-31 |
| MDM4 | AL158152. 1 | 0. 526 | 1. 85E-30 |
| MDM4 | AC006378. 1 | 0. 525 | 2. 65E-30 |
| MDM4 | SCARNA15    | 0. 614 | 1. 10E-43 |
| MDM4 | AL391684. 1 | 0. 605 | 4. 55E-42 |
| MDM4 | ZNF252P-AS1 | 0. 583 | 1. 90E-38 |
| MDM4 | AL354892. 3 | 0. 647 | 7. 88E-50 |
| MDM4 | AP000866. 6 | 0. 522 | 7. 49E-30 |
| MDM4 | AP000873. 4 | 0. 679 | 2. 37E-56 |
| MDM4 | AC005154. 1 | 0. 61  | 6. 01E-43 |
| MDM4 | AL512791. 1 | 0. 576 | 1. 80E-37 |

|      |            |       |          |
|------|------------|-------|----------|
| MDM4 | NARF-IT1   | 0.551 | 8.51E-34 |
| MDM4 | AC008764.2 | 0.554 | 3.26E-34 |
| MDM4 | PITRM1-AS1 | 0.517 | 2.91E-29 |
| MDM4 | AC096586.2 | 0.619 | 1.94E-44 |
| MDM4 | AC002553.1 | 0.672 | 8.17E-55 |
| MDM4 | AL049780.1 | 0.555 | 2.86E-34 |
| MDM4 | AC092802.2 | 0.603 | 8.89E-42 |
| MDM4 | LINC00894  | 0.55  | 1.07E-33 |
| MDM4 | AC005519.2 | 0.708 | 3.07E-63 |
| MDM4 | AC118344.1 | 0.512 | 1.21E-28 |
| MDM4 | AL031600.1 | 0.53  | 5.88E-31 |
| MDM4 | AC067852.6 | 0.546 | 4.40E-33 |
| MDM4 | AC112907.3 | 0.519 | 1.73E-29 |
| MDM4 | Clorf220   | 0.594 | 2.40E-40 |
| MDM4 | AF129075.1 | 0.604 | 6.14E-42 |
| MDM4 | AL355488.2 | 0.594 | 3.11E-40 |
| MDM4 | LINC00843  | 0.525 | 3.06E-30 |
| MDM4 | AL683813.1 | 0.56  | 5.09E-35 |
| MDM4 | Z98885.3   | 0.53  | 6.12E-31 |
| MDM4 | AC021491.2 | 0.512 | 1.25E-28 |
| MDM4 | AC010201.2 | 0.62  | 9.80E-45 |
| MDM4 | AC016737.1 | 0.535 | 1.35E-31 |
| MDM4 | AL022328.1 | 0.591 | 7.31E-40 |
| MDM4 | AC004893.2 | 0.595 | 2.01E-40 |
| MDM4 | AL022311.1 | 0.565 | 8.55E-36 |
| MDM4 | AC007038.1 | 0.592 | 7.07E-40 |
| MDM4 | AC116914.2 | 0.522 | 6.39E-30 |
| MDM4 | UBOX5-AS1  | 0.566 | 5.59E-36 |
| MDM4 | AC116552.1 | 0.56  | 4.06E-35 |
| MDM4 | PTOV1-AS2  | 0.577 | 1.23E-37 |
| MDM4 | AC010761.1 | 0.564 | 1.15E-35 |
| MDM4 | AC133550.2 | 0.573 | 5.31E-37 |
| MDM4 | CR936218.1 | 0.636 | 1.12E-47 |
| MDM4 | AL021707.3 | 0.524 | 4.08E-30 |
| MDM4 | AC068790.7 | 0.503 | 1.36E-27 |
| MDM4 | AC129510.1 | 0.592 | 6.35E-40 |
| MDM4 | SNHG4      | 0.503 | 1.63E-27 |
| MDM4 | AP002026.1 | 0.523 | 5.19E-30 |
| MDM4 | AC037459.3 | 0.574 | 3.93E-37 |
| MDM4 | RBM5-AS1   | 0.553 | 4.97E-34 |
| MDM4 | AC011462.4 | 0.549 | 1.88E-33 |
| MDM4 | AP002340.1 | 0.545 | 5.46E-33 |
| MDM4 | AC007390.2 | 0.637 | 9.60E-48 |
| MDM4 | AC026362.1 | 0.574 | 3.89E-37 |

|      |            |       |          |
|------|------------|-------|----------|
| MDM4 | SEMA3F-AS1 | 0.666 | 1.30E-53 |
| MDM4 | AL513327.3 | 0.539 | 4.01E-32 |
| MDM4 | AL135999.1 | 0.656 | 1.51E-51 |
| MDM4 | AL359715.3 | 0.57  | 1.40E-36 |
| MDM4 | AC114939.1 | 0.546 | 5.20E-33 |
| MDM4 | AC005104.1 | 0.64  | 1.85E-48 |
| MDM4 | GAS8-AS1   | 0.525 | 2.95E-30 |
| MDM4 | NCBP2-AS1  | 0.58  | 4.58E-38 |
| MDM4 | AL360091.1 | 0.516 | 3.96E-29 |
| MDM4 | AC002519.1 | 0.509 | 2.70E-28 |
| MDM4 | AC013468.1 | 0.507 | 5.10E-28 |
| MDM4 | AC022154.1 | 0.509 | 2.75E-28 |
| MDM4 | AC090589.3 | 0.65  | 2.18E-50 |
| MDM4 | AC025287.3 | 0.585 | 8.75E-39 |
| MDM4 | AC012170.2 | 0.647 | 8.87E-50 |
| MDM4 | AC100778.2 | 0.611 | 4.86E-43 |
| MDM4 | AC245060.6 | 0.563 | 1.86E-35 |
| MDM4 | AC010761.3 | 0.559 | 7.71E-35 |
| MDM4 | AC114490.1 | 0.556 | 1.74E-34 |
| MDM4 | LINC01772  | 0.577 | 1.27E-37 |
| MDM4 | AC066613.1 | 0.662 | 7.11E-53 |
| MDM4 | LINC00106  | 0.539 | 3.65E-32 |
| MDM4 | AL049869.3 | 0.575 | 3.31E-37 |
| MDM4 | AC010168.2 | 0.529 | 8.10E-31 |
| MDM4 | Z83843.1   | 0.702 | 6.92E-62 |
| MDM4 | PSMA3-AS1  | 0.735 | 1.48E-70 |
| MDM4 | AC010976.1 | 0.621 | 6.29E-45 |
| MDM4 | AL606760.2 | 0.516 | 4.02E-29 |
| MDM4 | AC025430.1 | 0.521 | 8.43E-30 |
| MDM4 | AC048382.2 | 0.561 | 3.66E-35 |
| MDM4 | AC024075.2 | 0.596 | 1.15E-40 |
| MDM4 | AP002490.1 | 0.591 | 8.04E-40 |
| MDM4 | AL359921.1 | 0.613 | 2.20E-43 |
| MDM4 | AC124319.2 | 0.605 | 3.80E-42 |
| MDM4 | AC243919.1 | 0.524 | 3.28E-30 |
| MDM4 | AC023510.2 | 0.53  | 5.59E-31 |
| MDM4 | AL669831.5 | 0.548 | 2.32E-33 |
| MDM4 | AC053513.1 | 0.547 | 3.01E-33 |
| MDM4 | AC004908.1 | 0.607 | 1.66E-42 |
| MDM4 | AL049840.1 | 0.615 | 6.86E-44 |
| MDM4 | STAM-AS1   | 0.508 | 3.71E-28 |
| MDM4 | AC091544.6 | 0.528 | 1.15E-30 |
| MDM4 | YEATS2-AS1 | 0.507 | 4.52E-28 |
| MDM4 | AL050343.1 | 0.53  | 5.59E-31 |

|      |             |        |           |
|------|-------------|--------|-----------|
| MDM4 | AC005546. 1 | 0. 518 | 2. 01E-29 |
| MDM4 | AC011461. 1 | 0. 6   | 3. 45E-41 |
| MDM4 | AL031320. 2 | 0. 575 | 2. 84E-37 |
| MDM4 | BCDIN3D-AS1 | 0. 511 | 1. 61E-28 |
| MDM4 | AC005070. 3 | 0. 525 | 2. 48E-30 |
| MDM4 | AC040934. 1 | 0. 538 | 6. 26E-32 |
| MDM4 | Z97832. 2   | 0. 533 | 2. 46E-31 |
| MDM4 | AC008735. 4 | 0. 593 | 4. 70E-40 |
| MDM4 | AC132938. 5 | 0. 543 | 1. 17E-32 |
| MDM4 | LINC01004   | 0. 647 | 7. 92E-50 |
| MDM4 | AC024075. 3 | 0. 505 | 9. 81E-28 |
| MDM4 | AL132989. 1 | 0. 74  | 6. 77E-72 |
| MDM4 | AC093752. 3 | 0. 624 | 1. 78E-45 |
| MDM4 | AC139887. 2 | 0. 545 | 6. 07E-33 |
| MDM4 | AC004148. 2 | 0. 663 | 5. 69E-53 |
| MDM4 | MIR3936HG   | 0. 502 | 2. 22E-27 |
| MDM4 | AC138150. 1 | 0. 534 | 2. 05E-31 |
| MDM4 | AP001001. 1 | 0. 546 | 4. 52E-33 |
| MDM4 | AP4B1-AS1   | 0. 618 | 2. 15E-44 |
| MDM4 | AL513190. 1 | 0. 54  | 2. 60E-32 |
| MDM4 | AP001793. 2 | 0. 555 | 2. 81E-34 |
| MDM4 | AC120053. 1 | 0. 509 | 2. 63E-28 |
| MDM4 | AL731569. 1 | 0. 52  | 1. 09E-29 |
| MDM4 | AC007566. 1 | 0. 569 | 2. 32E-36 |
| MDM4 | AL590652. 1 | 0. 537 | 7. 86E-32 |
| MDM4 | OCIAD1-AS1  | 0. 543 | 1. 07E-32 |
| MDM4 | AC109587. 1 | 0. 53  | 5. 49E-31 |
| MDM4 | AC079322. 1 | 0. 527 | 1. 62E-30 |
| MDM4 | AC018754. 1 | 0. 606 | 2. 95E-42 |
| MDM4 | SH3BP5-AS1  | 0. 628 | 3. 60E-46 |
| MDM4 | AC008894. 2 | 0. 595 | 2. 28E-40 |
| MDM4 | AL442128. 2 | 0. 532 | 3. 98E-31 |
| MDM4 | AC025043. 1 | 0. 542 | 1. 69E-32 |
| MDM4 | AC104964. 3 | 0. 533 | 2. 65E-31 |
| MDM4 | LINC01355   | 0. 669 | 3. 58E-54 |
| MDM4 | AP003392. 1 | 0. 564 | 1. 22E-35 |
| MDM4 | RHOA-IT1    | 0. 526 | 1. 99E-30 |
| MDM4 | PRMT5-AS1   | 0. 576 | 1. 78E-37 |
| MDM4 | AL139349. 1 | 0. 591 | 7. 47E-40 |
| MDM4 | AC139887. 4 | 0. 604 | 5. 33E-42 |
| MDM4 | AC024267. 3 | 0. 558 | 8. 63E-35 |
| MDM4 | AC007619. 1 | 0. 517 | 2. 65E-29 |
| MDM4 | AL355388. 2 | 0. 511 | 1. 51E-28 |
| MDM4 | AC021321. 1 | 0. 502 | 2. 18E-27 |

|      |             |        |           |
|------|-------------|--------|-----------|
| MDM4 | AL139089. 1 | 0. 501 | 2. 50E-27 |
| MDM4 | RUSC1-AS1   | 0. 587 | 4. 09E-39 |
| MDM4 | AC009095. 1 | 0. 612 | 3. 14E-43 |
| MDM4 | AC004076. 2 | 0. 546 | 4. 74E-33 |
| MDM4 | EHMT2-AS1   | 0. 502 | 1. 97E-27 |
| MDM4 | AC005329. 3 | 0. 508 | 3. 71E-28 |
| MDM4 | AL022328. 2 | 0. 648 | 5. 31E-50 |
| MDM4 | AC008741. 2 | 0. 594 | 2. 61E-40 |
| MDM4 | AC104564. 4 | 0. 578 | 9. 67E-38 |
| MDM4 | AC002553. 4 | 0. 571 | 9. 80E-37 |
| MDM4 | AL138921. 1 | 0. 546 | 4. 55E-33 |
| MDM4 | AC025034. 1 | 0. 529 | 9. 17E-31 |
| MDM4 | RAD51-AS1   | 0. 695 | 4. 35E-60 |
| MDM4 | AC139887. 1 | 0. 623 | 2. 71E-45 |
| MDM4 | HM13-IT1    | 0. 572 | 7. 52E-37 |
| MDM4 | AC084018. 2 | 0. 606 | 3. 43E-42 |
| MDM4 | AC095057. 3 | 0. 587 | 3. 76E-39 |
| MDM4 | AP000866. 1 | 0. 554 | 2. 99E-34 |
| MDM4 | AL158163. 2 | 0. 51  | 2. 44E-28 |
| MDM4 | AL353804. 2 | 0. 511 | 1. 47E-28 |
| MDM4 | AC008735. 2 | 0. 6   | 2. 92E-41 |
| MDM4 | DCUN1D2-AS  | 0. 503 | 1. 71E-27 |
| MDM4 | AC008543. 3 | 0. 525 | 2. 75E-30 |
| MDM4 | AC006042. 1 | 0. 613 | 1. 64E-43 |
| MDM4 | AC022400. 1 | 0. 512 | 1. 18E-28 |
| MDM4 | AC022558. 1 | 0. 558 | 9. 50E-35 |
| MDM4 | AC073575. 2 | 0. 58  | 5. 11E-38 |
| MDM4 | AP001107. 4 | 0. 581 | 3. 19E-38 |
| MDM4 | AL031775. 2 | 0. 51  | 2. 36E-28 |
| MDM4 | AC012358. 1 | 0. 606 | 2. 42E-42 |
| MDM4 | AC008124. 1 | 0. 515 | 4. 79E-29 |
| MDM4 | MALAT1      | 0. 628 | 3. 42E-46 |
| MDM4 | AL731566. 1 | 0. 543 | 1. 28E-32 |
| MDM4 | BMS1P4      | 0. 507 | 4. 31E-28 |
| MDM4 | AC010260. 1 | 0. 507 | 4. 39E-28 |
| MDM4 | AC020558. 2 | 0. 539 | 3. 98E-32 |
| MDM4 | AL390208. 1 | 0. 608 | 1. 30E-42 |
| MDM4 | RNF139-AS1  | 0. 524 | 4. 18E-30 |
| MDM4 | AC007038. 2 | 0. 542 | 1. 36E-32 |
| MDM4 | AC138956. 2 | 0. 65  | 2. 56E-50 |
| MDM4 | ACAP2-IT1   | 0. 51  | 2. 04E-28 |
| MDM4 | ZFHX2-AS1   | 0. 596 | 1. 31E-40 |
| MDM4 | AL117209. 1 | 0. 554 | 2. 89E-34 |
| MDM4 | AC138035. 1 | 0. 504 | 1. 29E-27 |

|      |             |        |           |
|------|-------------|--------|-----------|
| MDM4 | AC091185. 1 | 0. 539 | 4. 69E-32 |
| MDM4 | C1orf132    | 0. 617 | 3. 30E-44 |
| MDM4 | AC023355. 1 | 0. 514 | 6. 72E-29 |
| MDM4 | AC110285. 2 | 0. 503 | 1. 58E-27 |
| MDM4 | AL354733. 3 | 0. 549 | 1. 52E-33 |
| MDM4 | CTBP1-AS    | 0. 68  | 1. 00E-56 |
| MDM4 | AL035563. 1 | 0. 534 | 1. 75E-31 |
| MDM4 | AC021078. 1 | 0. 647 | 9. 73E-50 |
| MDM4 | ERVK13-1    | 0. 571 | 1. 09E-36 |
| MDM4 | TH2LCRR     | 0. 562 | 2. 44E-35 |
| MDM4 | AC078795. 1 | 0. 584 | 1. 09E-38 |
| MDM4 | AC087481. 3 | 0. 627 | 5. 16E-46 |
| MDM4 | AC009120. 4 | 0. 594 | 3. 46E-40 |
| MDM4 | AL360181. 2 | 0. 601 | 1. 88E-41 |
| MDM4 | AC211476. 2 | 0. 518 | 2. 04E-29 |
| MDM4 | AC107375. 1 | 0. 519 | 1. 64E-29 |
| MDM4 | AL591848. 4 | 0. 511 | 1. 43E-28 |
| MDM4 | AC114730. 3 | 0. 542 | 1. 67E-32 |
| MDM4 | AL136295. 2 | 0. 531 | 5. 12E-31 |
| MDM4 | AC108010. 1 | 0. 525 | 2. 76E-30 |
| MDM4 | AL139099. 3 | 0. 606 | 3. 03E-42 |
| MDM4 | AC073842. 2 | 0. 532 | 3. 39E-31 |
| MDM4 | PRKCZ-AS1   | 0. 528 | 1. 31E-30 |
| MDM4 | AC245884. 8 | 0. 547 | 3. 26E-33 |
| MDM4 | AC109460. 2 | 0. 605 | 3. 67E-42 |
| MDM4 | AL450384. 1 | 0. 506 | 6. 06E-28 |
| MDM4 | AL157871. 5 | 0. 576 | 2. 07E-37 |
| MDM4 | AL596202. 1 | 0. 533 | 2. 92E-31 |
| MDM4 | AL365330. 1 | 0. 64  | 2. 10E-48 |
| MDM4 | NPTN-IT1    | 0. 508 | 3. 87E-28 |
| MDM4 | AC080162. 1 | 0. 508 | 3. 75E-28 |
| MDM4 | AC027514. 2 | 0. 516 | 4. 31E-29 |
| MDM4 | AL158834. 2 | 0. 587 | 3. 84E-39 |
| MDM4 | AC073957. 3 | 0. 591 | 9. 87E-40 |
| MDM4 | SEMA6A-AS1  | 0. 586 | 6. 32E-39 |
| MDM4 | AL035448. 1 | 0. 512 | 1. 15E-28 |
| MDM4 | AC254562. 3 | 0. 506 | 6. 27E-28 |
| MDM4 | AP003096. 1 | 0. 559 | 5. 57E-35 |
| MDM4 | AC008870. 2 | 0. 545 | 6. 10E-33 |
| MDM4 | AC027601. 1 | 0. 522 | 7. 48E-30 |
| MDM4 | AP001628. 1 | 0. 528 | 1. 14E-30 |
| MDM4 | AC010998. 2 | 0. 559 | 7. 49E-35 |
| MDM4 | AC008522. 1 | 0. 521 | 8. 88E-30 |
| MDM4 | AC008770. 4 | 0. 575 | 2. 64E-37 |

|      |             |       |          |
|------|-------------|-------|----------|
| MDM4 | GABPB1-AS1  | 0.506 | 7.28E-28 |
| MDM4 | LINC00969   | 0.505 | 8.92E-28 |
| MDM4 | AC022558.3  | 0.629 | 2.56E-46 |
| MDM4 | AL450263.1  | 0.506 | 5.79E-28 |
| MDM4 | AL117350.1  | 0.527 | 1.66E-30 |
| MDM4 | AC092301.1  | 0.637 | 8.31E-48 |
| MDM4 | AC090260.1  | 0.509 | 3.10E-28 |
| MDM4 | AC011489.1  | 0.589 | 2.04E-39 |
| MDM4 | AL162274.1  | 0.522 | 6.37E-30 |
| MDM4 | AC079385.1  | 0.521 | 9.08E-30 |
| MDM4 | FAM13A-AS1  | 0.583 | 1.85E-38 |
| MDM4 | WASHC5-AS1  | 0.509 | 2.86E-28 |
| MDM4 | AP002907.1  | 0.504 | 1.13E-27 |
| MDM4 | AL031717.1  | 0.594 | 2.44E-40 |
| MDM4 | AL132989.2  | 0.518 | 2.35E-29 |
| MDM4 | AC012615.6  | 0.694 | 5.37E-60 |
| MDM4 | AL513365.2  | 0.555 | 2.74E-34 |
| MDM4 | AC002128.1  | 0.636 | 1.25E-47 |
| MDM4 | AC018695.4  | 0.552 | 5.66E-34 |
| MDM4 | AC090198.1  | 0.605 | 3.70E-42 |
| MDM4 | AC092338.1  | 0.539 | 3.51E-32 |
| MDM4 | MORF4L2-AS1 | 0.547 | 3.17E-33 |
| MDM4 | AL592430.1  | 0.529 | 9.85E-31 |
| MDM4 | AC132872.3  | 0.505 | 8.67E-28 |
| MDM4 | AC232271.1  | 0.635 | 1.89E-47 |
| MDM4 | AC008731.1  | 0.533 | 2.72E-31 |
| MDM4 | AC006480.2  | 0.509 | 2.52E-28 |
| MDM4 | AL355075.2  | 0.641 | 1.36E-48 |
| MDM4 | AC016738.1  | 0.527 | 1.76E-30 |
| MDM4 | AC138393.3  | 0.55  | 1.39E-33 |
| MDM4 | AL049552.1  | 0.597 | 7.98E-41 |
| MDM4 | AC253536.6  | 0.533 | 2.38E-31 |
| MDM4 | AC015802.4  | 0.521 | 9.22E-30 |
| MDM4 | AC009090.1  | 0.511 | 1.40E-28 |
| MDM4 | Z83844.2    | 0.527 | 1.70E-30 |
| MDM4 | AC000120.1  | 0.565 | 7.54E-36 |
| MDM4 | AC018638.7  | 0.556 | 1.76E-34 |
| MDM4 | MANEA-AS1   | 0.637 | 9.60E-48 |
| MDM4 | KLF3-AS1    | 0.572 | 7.46E-37 |
| MDM4 | INE1        | 0.667 | 7.06E-54 |
| MDM4 | AC008750.5  | 0.576 | 1.90E-37 |
| MDM4 | AC137932.3  | 0.599 | 3.66E-41 |
| MDM4 | AL359715.2  | 0.569 | 2.19E-36 |
| MDM4 | UBE2Q1-AS1  | 0.559 | 6.78E-35 |

|      |                  |        |           |
|------|------------------|--------|-----------|
| MDM4 | AL021707. 4      | 0. 585 | 7. 36E-39 |
| MDM4 | AC084824. 4      | 0. 564 | 1. 09E-35 |
| MDM4 | PLCG1-AS1        | 0. 504 | 1. 04E-27 |
| MDM4 | AC015849. 3      | 0. 624 | 2. 40E-45 |
| MDM4 | AC008735. 1      | 0. 607 | 1. 84E-42 |
| MDM4 | AC055855. 2      | 0. 697 | 1. 68E-60 |
| MDM4 | ZNF436-AS1       | 0. 551 | 8. 59E-34 |
| MDM4 | AC073335. 2      | 0. 57  | 1. 57E-36 |
| MDM4 | PDXDC2P-NPIPB14P | 0. 544 | 7. 27E-33 |
| MDM4 | AC099676. 1      | 0. 566 | 7. 04E-36 |
| MDM4 | DPP9-AS1         | 0. 513 | 8. 27E-29 |
| MDM4 | LENG8-AS1        | 0. 618 | 2. 01E-44 |
| MDM4 | N4BP2L2-IT2      | 0. 647 | 8. 46E-50 |
| MDM4 | AC013356. 2      | 0. 538 | 6. 37E-32 |
| MDM4 | MCM3AP-AS1       | 0. 566 | 6. 21E-36 |
| MDM4 | AL390728. 6      | 0. 565 | 9. 58E-36 |
| MDM4 | AC092794. 1      | 0. 595 | 2. 23E-40 |
| MDM4 | PSPC1-AS2        | 0. 595 | 2. 34E-40 |
| MDM4 | ALG13-AS1        | 0. 642 | 9. 59E-49 |
| MDM4 | AC073487. 1      | 0. 667 | 6. 21E-54 |
| MDM4 | AC098869. 2      | 0. 555 | 2. 82E-34 |
| MDM4 | AC106864. 1      | 0. 562 | 2. 72E-35 |
| MDM4 | ZDHHC20-IT1      | 0. 561 | 3. 25E-35 |
| MDM4 | AC090510. 2      | 0. 518 | 2. 21E-29 |
| MDM4 | AL133406. 2      | 0. 625 | 1. 56E-45 |
| MDM4 | AC090739. 1      | 0. 575 | 3. 33E-37 |
| MDM4 | AC084125. 2      | 0. 55  | 1. 27E-33 |
| MDM4 | AL513327. 1      | 0. 577 | 1. 39E-37 |
| MDM4 | AC127024. 4      | 0. 664 | 2. 73E-53 |
| MDM4 | AC096642. 1      | 0. 596 | 1. 39E-40 |
| MDM4 | AL450306. 1      | 0. 519 | 1. 50E-29 |
| MDM4 | AL354953. 1      | 0. 522 | 7. 08E-30 |
| MDM4 | AC084018. 1      | 0. 636 | 1. 13E-47 |
| MDM4 | AC022400. 5      | 0. 573 | 5. 14E-37 |
| MDM4 | AL139407. 1      | 0. 567 | 3. 94E-36 |
| MDM4 | AL118558. 1      | 0. 538 | 5. 75E-32 |
| MDM4 | AC025917. 1      | 0. 512 | 1. 33E-28 |
| MDM4 | FMR1-IT1         | 0. 57  | 1. 66E-36 |
| MDM4 | ZNF32-AS1        | 0. 538 | 4. 76E-32 |
| MDM4 | AC010201. 1      | 0. 543 | 1. 31E-32 |
| MDM4 | PCBP1-AS1        | 0. 514 | 6. 62E-29 |
| MDM4 | AC011481. 1      | 0. 502 | 2. 22E-27 |
| MDM4 | SPAG5-AS1        | 0. 598 | 6. 14E-41 |
| MDM4 | SSBP3-AS1        | 0. 567 | 4. 99E-36 |



|      |                           |        |           |
|------|---------------------------|--------|-----------|
| MDM4 | AC005387. 2               | 0. 578 | 9. 32E-38 |
| MDM4 | AC011472. 1               | 0. 537 | 7. 47E-32 |
| MDM4 | PSMD6-AS2                 | 0. 555 | 2. 60E-34 |
| MDM4 | ARHGAP27P1-BPTFP1-KPNA2P3 | 0. 508 | 3. 33E-28 |
| MDM4 | AC023908. 3               | 0. 63  | 1. 72E-46 |
| MDM4 | AC138956. 1               | 0. 639 | 3. 57E-48 |
| MDM4 | AC005253. 1               | 0. 596 | 1. 19E-40 |
| MDM4 | AP001107. 1               | 0. 562 | 2. 74E-35 |
| MDM4 | AL928654. 3               | 0. 659 | 2. 93E-52 |
| MDM4 | SNHG20                    | 0. 523 | 5. 17E-30 |
| MDM4 | AC036103. 1               | 0. 527 | 1. 67E-30 |
| MDM4 | AC009120. 2               | 0. 646 | 1. 41E-49 |
| MDM4 | AP000692. 1               | 0. 555 | 2. 13E-34 |
| MDM4 | AC003681. 1               | 0. 51  | 2. 20E-28 |
| MDM4 | LINC00265                 | 0. 591 | 9. 29E-40 |
| MDM4 | AC012170. 3               | 0. 576 | 2. 02E-37 |
| MDM4 | AC015727. 1               | 0. 516 | 3. 64E-29 |
| MDM4 | AC104532. 2               | 0. 556 | 1. 79E-34 |
| MDM4 | AC090607. 1               | 0. 521 | 1. 03E-29 |
| MDM4 | AC087301. 1               | 0. 542 | 1. 54E-32 |
| MDM4 | AL117339. 4               | 0. 506 | 6. 24E-28 |
| MDM4 | AC032044. 1               | 0. 524 | 3. 62E-30 |
| MDM4 | AC079336. 5               | 0. 521 | 8. 04E-30 |
| MDM4 | AC008764. 8               | 0. 632 | 6. 43E-47 |
| MDM4 | AC093788. 1               | 0. 559 | 6. 65E-35 |
| MDM4 | LINC00641                 | 0. 596 | 1. 48E-40 |
| MDM4 | AC004461. 2               | 0. 53  | 5. 91E-31 |
| MDM4 | EXTL3-AS1                 | 0. 553 | 4. 61E-34 |
| MDM4 | AC092119. 2               | 0. 587 | 4. 38E-39 |
| MDM4 | AC005154. 5               | 0. 521 | 9. 73E-30 |
| MDM4 | AC144548. 2               | 0. 6   | 2. 97E-41 |
| MDM4 | ZNF32-AS2                 | 0. 602 | 1. 48E-41 |
| MDM4 | AC025918. 1               | 0. 54  | 3. 09E-32 |
| MDM4 | AC136604. 2               | 0. 508 | 3. 33E-28 |
| MDM4 | TRAPPC12-AS1              | 0. 519 | 1. 86E-29 |
| MDM4 | CAPN10-AS1                | 0. 646 | 1. 35E-49 |
| MDM4 | AC004253. 1               | 0. 553 | 4. 81E-34 |
| MDM4 | AL021368. 3               | 0. 598 | 5. 88E-41 |
| MDM4 | AL157838. 1               | 0. 52  | 1. 06E-29 |
| MDM4 | AC003070. 1               | 0. 552 | 5. 90E-34 |
| MDM4 | AC084824. 3               | 0. 632 | 5. 73E-47 |
| MDM4 | AC135050. 5               | 0. 538 | 5. 02E-32 |
| MDM4 | AL034550. 1               | 0. 519 | 1. 51E-29 |
| MDM4 | AL022328. 3               | 0. 651 | 1. 71E-50 |

|         |               |         |           |
|---------|---------------|---------|-----------|
| MDM4    | AC048341. 2   | 0. 556  | 1. 87E-34 |
| MDM4    | DKFZP434I0714 | 0. 546  | 4. 21E-33 |
| MDM4    | NFYC-AS1      | 0. 545  | 6. 18E-33 |
| MDM4    | AC010618. 2   | 0. 54   | 3. 23E-32 |
| MDM4    | CCDC18-AS1    | 0. 643  | 5. 69E-49 |
| MDM4    | ZNF346-IT1    | 0. 557  | 1. 26E-34 |
| MDM4    | AL136295. 7   | 0. 519  | 1. 53E-29 |
| MDM4    | AC010530. 1   | 0. 52   | 1. 14E-29 |
| MDM4    | AL031714. 1   | 0. 663  | 5. 26E-53 |
| MDM4    | NDUFA6-AS1    | 0. 548  | 2. 31E-33 |
| MDM4    | Z84485. 1     | 0. 512  | 1. 28E-28 |
| MDM4    | AC010834. 3   | 0. 577  | 1. 20E-37 |
| MDM4    | ANKRD10-IT1   | 0. 654  | 3. 06E-51 |
| MDM4    | AC093495. 1   | 0. 611  | 3. 83E-43 |
| MDM4    | AC092123. 2   | 0. 537  | 6. 50E-32 |
| MDM4    | AC010320. 3   | 0. 516  | 3. 90E-29 |
| MDM4    | AC008937. 3   | 0. 507  | 4. 74E-28 |
| PRKAA1  | NNT-AS1       | 0. 553  | 5. 28E-34 |
| PRKAA1  | AC093297. 3   | 0. 557  | 1. 40E-34 |
| PRKAA1  | AC114956. 3   | 0. 558  | 9. 75E-35 |
| TMEM173 | LINC01094     | 0. 505  | 9. 50E-28 |
| TMEM173 | SMIM25        | 0. 528  | 1. 31E-30 |
| TMEM173 | LINC01943     | 0. 516  | 3. 97E-29 |
| TMEM173 | MIR4435-2HG   | 0. 541  | 2. 18E-32 |
| TMEM173 | DANCR         | -0. 509 | 2. 58E-28 |
| TMEM173 | VIM-AS1       | 0. 553  | 5. 47E-34 |
| TMEM173 | AC147651. 3   | 0. 536  | 9. 47E-32 |
| TMEM173 | PCED1B-AS1    | 0. 515  | 5. 91E-29 |
| TMEM173 | AC108860. 2   | -0. 523 | 5. 46E-30 |
| TMEM173 | USP30-AS1     | 0. 529  | 7. 96E-31 |
| TMEM173 | PSMB8-AS1     | 0. 543  | 1. 16E-32 |
| TMEM173 | AC007728. 2   | 0. 503  | 1. 47E-27 |
| TMEM173 | AC061975. 7   | -0. 532 | 3. 78E-31 |
| TMEM173 | CYTOR         | 0. 558  | 1. 04E-34 |
| TMEM173 | AL157394. 1   | 0. 599  | 4. 18E-41 |
| PRR4    | AC006064. 2   | 0. 537  | 8. 65E-32 |
| PRR4    | AC016747. 3   | 0. 64   | 2. 34E-48 |
| PRR4    | LINC01911     | 0. 539  | 3. 46E-32 |
| PRR4    | AC111182. 1   | 0. 518  | 2. 17E-29 |
| PRR4    | AP000897. 1   | 0. 591  | 8. 24E-40 |
| PRR4    | AL139081. 1   | 0. 542  | 1. 43E-32 |
| PRR4    | AC025031. 1   | 0. 567  | 4. 37E-36 |
| PRR4    | SAP30L-AS1    | 0. 564  | 1. 33E-35 |
| PRR4    | AC013714. 1   | 0. 533  | 2. 94E-31 |

|      |            |       |          |
|------|------------|-------|----------|
| PRR4 | USP12-AS1  | 0.567 | 4.05E-36 |
| PRR4 | AP001922.3 | 0.546 | 4.00E-33 |
| PRR4 | AC009248.2 | 0.617 | 3.48E-44 |
| PRR4 | AC073569.1 | 0.546 | 5.08E-33 |
| PRR4 | AC116424.1 | 0.611 | 4.65E-43 |
| PRR4 | AC022778.1 | 0.609 | 1.04E-42 |
| PRR4 | AC106037.2 | 0.648 | 5.79E-50 |
| PRR4 | AL391863.1 | 0.61  | 6.98E-43 |
| PRR4 | AC011825.2 | 0.614 | 1.21E-43 |
| PRR4 | AC020908.3 | 0.506 | 6.57E-28 |
| PRR4 | AP006248.4 | 0.519 | 1.46E-29 |
| PRR4 | DIAPH3-AS2 | 0.548 | 2.16E-33 |
| PRR4 | AL590822.2 | 0.594 | 3.05E-40 |
| PRR4 | AC068473.2 | 0.523 | 5.19E-30 |
| PRR4 | ST7-OT4    | 0.604 | 6.48E-42 |
| PRR4 | LATS2-AS1  | 0.588 | 2.47E-39 |
| PRR4 | MIR133A1HG | 0.613 | 1.97E-43 |
| PRR4 | AC027288.1 | 0.51  | 2.01E-28 |
| PRR4 | AP003086.3 | 0.626 | 1.03E-45 |
| PRR4 | AC024937.3 | 0.562 | 2.07E-35 |
| PRR4 | AC105345.2 | 0.526 | 1.96E-30 |
| PRR4 | AC087286.1 | 0.606 | 3.13E-42 |
| PRR4 | AL157955.2 | 0.556 | 1.56E-34 |
| PRR4 | AL354989.1 | 0.503 | 1.51E-27 |
| PRR4 | USP3-AS1   | 0.507 | 4.39E-28 |
| PRR4 | AC016738.2 | 0.534 | 1.82E-31 |
| PRR4 | AC023855.1 | 0.542 | 1.42E-32 |
| PRR4 | LARS2-AS1  | 0.593 | 4.85E-40 |
| PRR4 | AC104984.6 | 0.585 | 6.61E-39 |
| PRR4 | AC087749.1 | 0.625 | 1.33E-45 |
| PRR4 | AC064852.1 | 0.62  | 8.98E-45 |
| PRR4 | AC023154.1 | 0.51  | 2.35E-28 |
| PRR4 | AC012568.1 | 0.584 | 9.62E-39 |
| PRR4 | AC092620.3 | 0.547 | 3.46E-33 |
| PRR4 | THOC7-AS1  | 0.633 | 4.39E-47 |
| PRR4 | AIRN       | 0.633 | 4.01E-47 |
| PRR4 | AC012301.1 | 0.505 | 7.51E-28 |
| PRR4 | AC015853.3 | 0.528 | 1.25E-30 |
| PRR4 | AC018557.2 | 0.519 | 1.59E-29 |
| PRR4 | AC004039.1 | 0.612 | 2.53E-43 |
| PRR4 | AL162253.1 | 0.564 | 1.12E-35 |
| PRR4 | NADK2-AS1  | 0.549 | 1.75E-33 |
| PRR4 | AC133106.1 | 0.541 | 2.40E-32 |
| PRR4 | AP001439.1 | 0.525 | 2.51E-30 |

|      |              |        |           |
|------|--------------|--------|-----------|
| PRR4 | AC068888. 2  | 0. 585 | 6. 98E-39 |
| PRR4 | AP001350. 1  | 0. 586 | 6. 30E-39 |
| PRR4 | DPYD-AS2     | 0. 512 | 1. 17E-28 |
| PRR4 | AC009996. 1  | 0. 521 | 8. 06E-30 |
| PRR4 | AC083806. 2  | 0. 631 | 1. 11E-46 |
| PRR4 | SMAD1-AS2    | 0. 604 | 6. 63E-42 |
| PRR4 | AC117500. 3  | 0. 643 | 6. 95E-49 |
| PRR4 | EDRF1-AS1    | 0. 591 | 7. 30E-40 |
| PRR4 | AC009318. 1  | 0. 556 | 1. 88E-34 |
| PRR4 | AC110813. 1  | 0. 615 | 6. 88E-44 |
| PRR4 | NAALADL2-AS1 | 0. 55  | 1. 21E-33 |
| PRR4 | AC004223. 2  | 0. 59  | 1. 51E-39 |
| PRR4 | AC008026. 3  | 0. 578 | 8. 25E-38 |
| PRR4 | AL023755. 1  | 0. 517 | 2. 66E-29 |
| PRR4 | AC007622. 2  | 0. 581 | 3. 58E-38 |
| PRR4 | AC010082. 1  | 0. 524 | 3. 79E-30 |
| PRR4 | Z82217. 1    | 0. 648 | 5. 24E-50 |
| PRR4 | AL357552. 2  | 0. 557 | 1. 09E-34 |
| PRR4 | AC244131. 2  | 0. 511 | 1. 76E-28 |
| PRR4 | AL157392. 3  | 0. 501 | 2. 75E-27 |
| PRR4 | AC107464. 2  | 0. 609 | 8. 84E-43 |
| PRR4 | AL162430. 2  | 0. 558 | 9. 09E-35 |
| PRR4 | AC104109. 4  | 0. 554 | 3. 46E-34 |
| PRR4 | TSPAN9-IT1   | 0. 618 | 2. 78E-44 |
| PRR4 | DOCK4-AS1    | 0. 578 | 8. 96E-38 |
| PRR4 | ITPK1-AS1    | 0. 572 | 9. 04E-37 |
| PRR4 | AC017002. 5  | 0. 523 | 4. 51E-30 |
| PRR4 | AC012150. 2  | 0. 601 | 1. 74E-41 |
| PRR4 | AC131182. 1  | 0. 601 | 1. 90E-41 |
| PRR4 | AC019270. 1  | 0. 585 | 7. 32E-39 |
| PRR4 | AC026474. 1  | 0. 508 | 3. 25E-28 |
| PRR4 | AC092828. 1  | 0. 638 | 4. 33E-48 |
| PRR4 | AL096772. 1  | 0. 583 | 1. 93E-38 |
| PRR4 | SALRNA2      | 0. 562 | 2. 11E-35 |
| PRR4 | AC005740. 3  | 0. 546 | 4. 38E-33 |
| PRR4 | AC008871. 1  | 0. 511 | 1. 65E-28 |
| PRR4 | AL359851. 1  | 0. 624 | 2. 22E-45 |
| PRR4 | AC012404. 2  | 0. 508 | 3. 54E-28 |
| PRR4 | AC096564. 2  | 0. 511 | 1. 40E-28 |
| PRR4 | AL450998. 3  | 0. 598 | 5. 35E-41 |
| PRR4 | SALRNA3      | 0. 518 | 2. 40E-29 |
| PRR4 | AP001429. 1  | 0. 554 | 3. 89E-34 |
| PRR4 | AL357874. 2  | 0. 518 | 2. 51E-29 |
| PRR4 | AL360157. 1  | 0. 595 | 1. 90E-40 |

|      |              |        |           |
|------|--------------|--------|-----------|
| PRR4 | AC020661. 5  | 0. 617 | 4. 16E-44 |
| PRR4 | MTOR-AS1     | 0. 629 | 2. 79E-46 |
| PRR4 | AC108449. 1  | 0. 546 | 5. 21E-33 |
| PRR4 | AC027335. 1  | 0. 587 | 4. 25E-39 |
| PRR4 | AC073651. 1  | 0. 664 | 3. 91E-53 |
| PRR4 | AP000266. 1  | 0. 557 | 1. 19E-34 |
| PRR4 | AC108159. 1  | 0. 545 | 6. 76E-33 |
| PRR4 | AF127577. 2  | 0. 581 | 3. 02E-38 |
| PRR4 | Z97652. 1    | 0. 524 | 3. 45E-30 |
| PRR4 | AC009163. 3  | 0. 608 | 1. 30E-42 |
| PRR4 | AC036222. 2  | 0. 512 | 1. 24E-28 |
| PRR4 | AC136424. 2  | 0. 585 | 7. 47E-39 |
| PRR4 | AC015923. 1  | 0. 625 | 1. 23E-45 |
| PRR4 | AL158152. 1  | 0. 627 | 5. 47E-46 |
| PRR4 | AP006259. 1  | 0. 582 | 2. 66E-38 |
| PRR4 | PRICKLE2-AS2 | 0. 534 | 1. 73E-31 |
| PRR4 | Z99289. 1    | 0. 571 | 1. 23E-36 |
| PRR4 | AL022323. 2  | 0. 503 | 1. 62E-27 |
| PRR4 | SCARNA15     | 0. 526 | 2. 28E-30 |
| PRR4 | AL031005. 1  | 0. 615 | 9. 19E-44 |
| PRR4 | EGFLAM-AS2   | 0. 509 | 3. 23E-28 |
| PRR4 | AP000753. 2  | 0. 591 | 9. 34E-40 |
| PRR4 | AP001775. 2  | 0. 51  | 2. 42E-28 |
| PRR4 | AC027514. 1  | 0. 633 | 4. 62E-47 |
| PRR4 | GTF3C2-AS1   | 0. 558 | 1. 03E-34 |
| PRR4 | AL133499. 1  | 0. 54  | 2. 95E-32 |
| PRR4 | AL031668. 1  | 0. 636 | 1. 54E-47 |
| PRR4 | AC022973. 3  | 0. 665 | 2. 11E-53 |
| PRR4 | AL109930. 1  | 0. 502 | 2. 22E-27 |
| PRR4 | AC010261. 2  | 0. 614 | 1. 23E-43 |
| PRR4 | COL18A1-AS2  | 0. 577 | 1. 25E-37 |
| PRR4 | AC107909. 2  | 0. 547 | 3. 73E-33 |
| PRR4 | AC009365. 2  | 0. 625 | 1. 21E-45 |
| PRR4 | AC099811. 4  | 0. 615 | 6. 95E-44 |
| PRR4 | AC110603. 1  | 0. 553 | 4. 53E-34 |
| PRR4 | AP003785. 1  | 0. 603 | 9. 49E-42 |
| PRR4 | AC026782. 1  | 0. 546 | 3. 96E-33 |
| PRR4 | AL035658. 1  | 0. 553 | 4. 96E-34 |
| PRR4 | PITRM1-AS1   | 0. 563 | 1. 65E-35 |
| PRR4 | AL445685. 1  | 0. 509 | 2. 77E-28 |
| PRR4 | AC022960. 1  | 0. 577 | 1. 33E-37 |
| PRR4 | AC092755. 1  | 0. 522 | 6. 98E-30 |
| PRR4 | AC073130. 2  | 0. 507 | 4. 43E-28 |
| PRR4 | AC018511. 1  | 0. 573 | 4. 75E-37 |

|      |               |        |           |
|------|---------------|--------|-----------|
| PRR4 | AC009303. 2   | 0. 58  | 5. 67E-38 |
| PRR4 | AL121900. 1   | 0. 62  | 1. 19E-44 |
| PRR4 | ZBTB20-AS5    | 0. 6   | 2. 91E-41 |
| PRR4 | AC009063. 1   | 0. 535 | 1. 46E-31 |
| PRR4 | AC092802. 2   | 0. 532 | 3. 18E-31 |
| PRR4 | AL512506. 1   | 0. 54  | 3. 38E-32 |
| PRR4 | AC104129. 1   | 0. 548 | 2. 32E-33 |
| PRR4 | AC105206. 1   | 0. 591 | 9. 66E-40 |
| PRR4 | AC110048. 2   | 0. 505 | 8. 16E-28 |
| PRR4 | AC005519. 2   | 0. 524 | 3. 56E-30 |
| PRR4 | PLCE1-AS1     | 0. 512 | 1. 30E-28 |
| PRR4 | AC090518. 1   | 0. 553 | 5. 51E-34 |
| PRR4 | AC018511. 2   | 0. 622 | 5. 25E-45 |
| PRR4 | AC067852. 6   | 0. 526 | 1. 84E-30 |
| PRR4 | AC068790. 5   | 0. 522 | 7. 32E-30 |
| PRR4 | AC013549. 2   | 0. 594 | 2. 84E-40 |
| PRR4 | AL161725. 1   | 0. 622 | 4. 26E-45 |
| PRR4 | AF129075. 1   | 0. 542 | 1. 59E-32 |
| PRR4 | AC012555. 2   | 0. 529 | 7. 52E-31 |
| PRR4 | LINC00843     | 0. 594 | 2. 74E-40 |
| PRR4 | AL360169. 1   | 0. 61  | 6. 76E-43 |
| PRR4 | Z98885. 3     | 0. 614 | 1. 05E-43 |
| PRR4 | AC004943. 1   | 0. 61  | 5. 26E-43 |
| PRR4 | LRP1-AS       | 0. 504 | 1. 18E-27 |
| PRR4 | AL161457. 2   | 0. 557 | 1. 29E-34 |
| PRR4 | AC008277. 1   | 0. 656 | 1. 77E-51 |
| PRR4 | LINC01981     | 0. 508 | 3. 59E-28 |
| PRR4 | AL591242. 1   | 0. 502 | 1. 81E-27 |
| PRR4 | AC106873. 1   | 0. 618 | 2. 36E-44 |
| PRR4 | AC005838. 2   | 0. 527 | 1. 60E-30 |
| PRR4 | CYYR1-AS1     | 0. 528 | 1. 08E-30 |
| PRR4 | AL139022. 1   | 0. 598 | 6. 41E-41 |
| PRR4 | CNOT10-AS1    | 0. 595 | 1. 69E-40 |
| PRR4 | AC083805. 2   | 0. 54  | 3. 09E-32 |
| PRR4 | AL731577. 1   | 0. 594 | 3. 24E-40 |
| PRR4 | AL807761. 4   | 0. 597 | 8. 56E-41 |
| PRR4 | AC009145. 3   | 0. 507 | 4. 36E-28 |
| PRR4 | EGFLAM-AS3    | 0. 586 | 5. 23E-39 |
| PRR4 | AC007038. 1   | 0. 548 | 2. 24E-33 |
| PRR4 | AC097381. 2   | 0. 529 | 9. 08E-31 |
| PRR4 | CTB-113P19. 1 | 0. 549 | 1. 66E-33 |
| PRR4 | AL158832. 1   | 0. 632 | 6. 49E-47 |
| PRR4 | AC021744. 1   | 0. 542 | 1. 35E-32 |
| PRR4 | AL020995. 1   | 0. 615 | 6. 71E-44 |

|      |             |        |           |
|------|-------------|--------|-----------|
| PRR4 | AL022238. 2 | 0. 632 | 8. 23E-47 |
| PRR4 | BRWD1-IT1   | 0. 559 | 6. 13E-35 |
| PRR4 | AC007448. 2 | 0. 605 | 4. 22E-42 |
| PRR4 | AC026401. 1 | 0. 578 | 1. 06E-37 |
| PRR4 | CFLAR-AS1   | 0. 643 | 5. 85E-49 |
| PRR4 | AC004217. 2 | 0. 571 | 1. 11E-36 |
| PRR4 | AP001970. 1 | 0. 586 | 4. 89E-39 |
| PRR4 | AC006355. 2 | 0. 524 | 3. 74E-30 |
| PRR4 | AL354733. 2 | 0. 655 | 2. 42E-51 |
| PRR4 | AL513185. 1 | 0. 569 | 2. 51E-36 |
| PRR4 | AC008395. 1 | 0. 598 | 5. 32E-41 |
| PRR4 | AC102945. 1 | 0. 539 | 4. 19E-32 |
| PRR4 | SND1-IT1    | 0. 628 | 3. 42E-46 |
| PRR4 | AC090559. 2 | 0. 546 | 4. 38E-33 |
| PRR4 | AP003467. 1 | 0. 61  | 5. 60E-43 |
| PRR4 | AC007496. 2 | 0. 561 | 2. 95E-35 |
| PRR4 | AC103702. 1 | 0. 602 | 1. 33E-41 |
| PRR4 | RERG-AS1    | 0. 525 | 2. 93E-30 |
| PRR4 | AL157938. 2 | 0. 645 | 2. 37E-49 |
| PRR4 | CR936218. 1 | 0. 612 | 3. 25E-43 |
| PRR4 | MCM8-AS1    | 0. 588 | 2. 75E-39 |
| PRR4 | AC068790. 7 | 0. 532 | 3. 49E-31 |
| PRR4 | AL512366. 1 | 0. 519 | 1. 83E-29 |
| PRR4 | AC010285. 2 | 0. 51  | 1. 93E-28 |
| PRR4 | AC026124. 1 | 0. 569 | 1. 99E-36 |
| PRR4 | AC129510. 1 | 0. 508 | 4. 30E-28 |
| PRR4 | AC009032. 1 | 0. 573 | 6. 67E-37 |
| PRR4 | RBM5-AS1    | 0. 567 | 4. 32E-36 |
| PRR4 | TXNDC12-AS1 | 0. 506 | 7. 31E-28 |
| PRR4 | AC005828. 2 | 0. 605 | 4. 17E-42 |
| PRR4 | SNHG22      | 0. 538 | 5. 23E-32 |
| PRR4 | FGF12-AS1   | 0. 564 | 1. 24E-35 |
| PRR4 | AL117381. 1 | 0. 522 | 6. 95E-30 |
| PRR4 | CXXC4-AS1   | 0. 556 | 1. 73E-34 |
| PRR4 | AC022613. 3 | 0. 65  | 2. 65E-50 |
| PRR4 | AC005828. 1 | 0. 613 | 2. 08E-43 |
| PRR4 | AC007390. 2 | 0. 61  | 5. 34E-43 |
| PRR4 | AC111194. 2 | 0. 574 | 4. 08E-37 |
| PRR4 | AC090220. 1 | 0. 63  | 1. 82E-46 |
| PRR4 | AL391421. 1 | 0. 546 | 4. 41E-33 |
| PRR4 | AC018761. 3 | 0. 51  | 2. 22E-28 |
| PRR4 | AL139193. 2 | 0. 603 | 8. 27E-42 |
| PRR4 | AC107021. 1 | 0. 536 | 9. 20E-32 |
| PRR4 | SHANK2-AS2  | 0. 513 | 9. 46E-29 |

|      |             |        |           |
|------|-------------|--------|-----------|
| PRR4 | AC016405. 1 | 0. 587 | 4. 02E-39 |
| PRR4 | ITPKB-AS1   | 0. 574 | 4. 06E-37 |
| PRR4 | AC013549. 3 | 0. 558 | 9. 11E-35 |
| PRR4 | AC087501. 3 | 0. 608 | 1. 21E-42 |
| PRR4 | AC092168. 2 | 0. 505 | 8. 09E-28 |
| PRR4 | AC025576. 2 | 0. 532 | 3. 15E-31 |
| PRR4 | AL136311. 1 | 0. 686 | 5. 15E-58 |
| PRR4 | AC092127. 1 | 0. 592 | 5. 43E-40 |
| PRR4 | AL354794. 1 | 0. 54  | 2. 86E-32 |
| PRR4 | AC005104. 1 | 0. 541 | 2. 22E-32 |
| PRR4 | AC027801. 5 | 0. 507 | 4. 88E-28 |
| PRR4 | AC018682. 1 | 0. 548 | 2. 48E-33 |
| PRR4 | AC073964. 1 | 0. 584 | 1. 21E-38 |
| PRR4 | AC004466. 2 | 0. 502 | 1. 79E-27 |
| PRR4 | ITGB5-AS1   | 0. 592 | 5. 66E-40 |
| PRR4 | AC107896. 1 | 0. 563 | 1. 51E-35 |
| PRR4 | AP002892. 1 | 0. 607 | 2. 38E-42 |
| PRR4 | AL360091. 1 | 0. 553 | 4. 40E-34 |
| PRR4 | FP700111. 1 | 0. 519 | 1. 84E-29 |
| PRR4 | AC024475. 1 | 0. 567 | 4. 26E-36 |
| PRR4 | AC110491. 2 | 0. 601 | 2. 22E-41 |
| PRR4 | AC087260. 1 | 0. 529 | 7. 70E-31 |
| PRR4 | AC007731. 4 | 0. 588 | 2. 50E-39 |
| PRR4 | AP003043. 1 | 0. 529 | 7. 58E-31 |
| PRR4 | AC023034. 1 | 0. 54  | 3. 07E-32 |
| PRR4 | AC012379. 1 | 0. 58  | 4. 20E-38 |
| PRR4 | AC008700. 1 | 0. 54  | 2. 73E-32 |
| PRR4 | VWC2L-IT1   | 0. 51  | 2. 43E-28 |
| PRR4 | AL389885. 1 | 0. 523 | 4. 54E-30 |
| PRR4 | AL022322. 2 | 0. 598 | 6. 01E-41 |
| PRR4 | AC009754. 1 | 0. 532 | 3. 02E-31 |
| PRR4 | AC012170. 2 | 0. 531 | 4. 37E-31 |
| PRR4 | AL157938. 3 | 0. 635 | 1. 57E-47 |
| PRR4 | AC007114. 2 | 0. 607 | 2. 04E-42 |
| PRR4 | SPATA13-AS1 | 0. 574 | 3. 52E-37 |
| PRR4 | AC066613. 2 | 0. 582 | 2. 46E-38 |
| PRR4 | AP006333. 2 | 0. 53  | 6. 47E-31 |
| PRR4 | AC092868. 2 | 0. 581 | 3. 92E-38 |
| PRR4 | AL583808. 2 | 0. 545 | 6. 82E-33 |
| PRR4 | AL499616. 1 | 0. 556 | 2. 04E-34 |
| PRR4 | AL355613. 1 | 0. 586 | 6. 31E-39 |
| PRR4 | AC007342. 1 | 0. 559 | 6. 05E-35 |
| PRR4 | AC010761. 3 | 0. 53  | 6. 95E-31 |
| PRR4 | AL592301. 1 | 0. 535 | 1. 31E-31 |



|      |                 |        |           |
|------|-----------------|--------|-----------|
| PRR4 | AL138916. 2     | 0. 521 | 8. 33E-30 |
| PRR4 | AL133284. 1     | 0. 609 | 7. 52E-43 |
| PRR4 | LINC01772       | 0. 587 | 3. 67E-39 |
| PRR4 | AC066613. 1     | 0. 542 | 1. 66E-32 |
| PRR4 | WWC3-AS1        | 0. 518 | 1. 89E-29 |
| PRR4 | AF131216. 1     | 0. 522 | 5. 94E-30 |
| PRR4 | AC120498. 1     | 0. 517 | 2. 53E-29 |
| PRR4 | ASH1L-IT1       | 0. 613 | 1. 62E-43 |
| PRR4 | AL589863. 1     | 0. 633 | 4. 77E-47 |
| PRR4 | AL049869. 3     | 0. 554 | 3. 07E-34 |
| PRR4 | AC113146. 1     | 0. 56  | 4. 26E-35 |
| PRR4 | AC073326. 1     | 0. 509 | 2. 77E-28 |
| PRR4 | GSN-AS1         | 0. 617 | 3. 65E-44 |
| PRR4 | AL669841. 1     | 0. 559 | 7. 00E-35 |
| PRR4 | AL034349. 1     | 0. 527 | 1. 69E-30 |
| PRR4 | Z83843. 1       | 0. 656 | 1. 48E-51 |
| PRR4 | AC096721. 1     | 0. 629 | 2. 54E-46 |
| PRR4 | AC010976. 1     | 0. 705 | 1. 60E-62 |
| PRR4 | AC010401. 2     | 0. 516 | 4. 32E-29 |
| PRR4 | AC090971. 2     | 0. 556 | 1. 71E-34 |
| PRR4 | AL117341. 1     | 0. 623 | 2. 55E-45 |
| PRR4 | AC002558. 3     | 0. 61  | 6. 77E-43 |
| PRR4 | IQCJ-SCHIP1-AS1 | 0. 584 | 9. 68E-39 |
| PRR4 | SEC62-AS1       | 0. 576 | 1. 80E-37 |
| PRR4 | AC025430. 1     | 0. 641 | 1. 52E-48 |
| PRR4 | ARHGAP26-IT1    | 0. 518 | 2. 37E-29 |
| PRR4 | AC104827. 1     | 0. 624 | 1. 87E-45 |
| PRR4 | AL358075. 1     | 0. 557 | 1. 24E-34 |
| PRR4 | AC104316. 1     | 0. 538 | 5. 72E-32 |
| PRR4 | AC105150. 1     | 0. 604 | 5. 82E-42 |
| PRR4 | AP002490. 1     | 0. 55  | 1. 18E-33 |
| PRR4 | AC104964. 2     | 0. 603 | 1. 09E-41 |
| PRR4 | AC087284. 1     | 0. 526 | 2. 12E-30 |
| PRR4 | AC124319. 2     | 0. 563 | 1. 58E-35 |
| PRR4 | AL138808. 1     | 0. 557 | 1. 22E-34 |
| PRR4 | AC022447. 1     | 0. 536 | 1. 11E-31 |
| PRR4 | AC016493. 1     | 0. 626 | 1. 06E-45 |
| PRR4 | AL355483. 3     | 0. 505 | 8. 43E-28 |
| PRR4 | AL357093. 1     | 0. 522 | 6. 56E-30 |
| PRR4 | AL669831. 5     | 0. 514 | 7. 58E-29 |
| PRR4 | AC053513. 1     | 0. 622 | 5. 32E-45 |
| PRR4 | AC105760. 1     | 0. 607 | 2. 27E-42 |
| PRR4 | AL139118. 1     | 0. 528 | 1. 31E-30 |
| PRR4 | AL021937. 3     | 0. 509 | 2. 97E-28 |

|      |              |        |           |
|------|--------------|--------|-----------|
| PRR4 | AC007601. 1  | 0. 529 | 7. 98E-31 |
| PRR4 | CACNA1C-AS3  | 0. 617 | 4. 11E-44 |
| PRR4 | AL049840. 1  | 0. 559 | 7. 09E-35 |
| PRR4 | AL133227. 1  | 0. 54  | 3. 13E-32 |
| PRR4 | AC025038. 1  | 0. 577 | 1. 63E-37 |
| PRR4 | LINC01796    | 0. 531 | 4. 46E-31 |
| PRR4 | LPP-AS1      | 0. 6   | 2. 50E-41 |
| PRR4 | AC007688. 3  | 0. 562 | 2. 13E-35 |
| PRR4 | AC006206. 1  | 0. 539 | 4. 28E-32 |
| PRR4 | AC132192. 1  | 0. 575 | 2. 85E-37 |
| PRR4 | AC016866. 2  | 0. 537 | 8. 34E-32 |
| PRR4 | RNF216-IT1   | 0. 51  | 2. 33E-28 |
| PRR4 | AC087439. 1  | 0. 525 | 2. 43E-30 |
| PRR4 | AC046158. 1  | 0. 615 | 6. 73E-44 |
| PRR4 | AC024270. 5  | 0. 536 | 1. 06E-31 |
| PRR4 | AP000462. 2  | 0. 527 | 1. 38E-30 |
| PRR4 | AL050343. 1  | 0. 535 | 1. 29E-31 |
| PRR4 | AC005546. 1  | 0. 528 | 1. 26E-30 |
| PRR4 | AL031320. 2  | 0. 571 | 1. 29E-36 |
| PRR4 | AC090617. 5  | 0. 55  | 1. 13E-33 |
| PRR4 | AP001020. 3  | 0. 651 | 1. 31E-50 |
| PRR4 | AC074366. 1  | 0. 531 | 4. 75E-31 |
| PRR4 | AC124283. 3  | 0. 538 | 6. 31E-32 |
| PRR4 | AL136982. 3  | 0. 635 | 2. 15E-47 |
| PRR4 | AC099811. 5  | 0. 585 | 7. 05E-39 |
| PRR4 | SMYD3-IT1    | 0. 595 | 1. 83E-40 |
| PRR4 | AC067817. 1  | 0. 556 | 1. 57E-34 |
| PRR4 | POC1B-AS1    | 0. 52  | 1. 38E-29 |
| PRR4 | DOCK9-AS1    | 0. 64  | 2. 25E-48 |
| PRR4 | AC016245. 1  | 0. 586 | 5. 86E-39 |
| PRR4 | RNASEH2B-AS1 | 0. 549 | 1. 61E-33 |
| PRR4 | AL121759. 1  | 0. 537 | 7. 24E-32 |
| PRR4 | AL590729. 1  | 0. 528 | 1. 28E-30 |
| PRR4 | AC092653. 1  | 0. 562 | 2. 35E-35 |
| PRR4 | AC007431. 2  | 0. 624 | 1. 89E-45 |
| PRR4 | AC096741. 2  | 0. 625 | 1. 61E-45 |
| PRR4 | AP003696. 1  | 0. 533 | 2. 89E-31 |
| PRR4 | AL356481. 2  | 0. 579 | 6. 71E-38 |
| PRR4 | ITCH-AS1     | 0. 602 | 1. 36E-41 |
| PRR4 | NFIA-AS1     | 0. 624 | 1. 68E-45 |
| PRR4 | AC005096. 1  | 0. 587 | 3. 36E-39 |
| PRR4 | AL365436. 2  | 0. 55  | 1. 43E-33 |
| PRR4 | AC005070. 3  | 0. 628 | 3. 85E-46 |
| PRR4 | AC040934. 1  | 0. 541 | 2. 11E-32 |

|      |             |        |           |
|------|-------------|--------|-----------|
| PRR4 | AP000897. 2 | 0. 578 | 1. 03E-37 |
| PRR4 | TCF7L1-IT1  | 0. 517 | 2. 93E-29 |
| PRR4 | AL158834. 1 | 0. 625 | 1. 49E-45 |
| PRR4 | AC087749. 2 | 0. 591 | 8. 66E-40 |
| PRR4 | FOXN3-AS2   | 0. 563 | 1. 70E-35 |
| PRR4 | AC138058. 1 | 0. 59  | 1. 06E-39 |
| PRR4 | AC110792. 3 | 0. 62  | 9. 82E-45 |
| PRR4 | AL132989. 1 | 0. 602 | 1. 19E-41 |
| PRR4 | B4GALT4-AS1 | 0. 503 | 1. 45E-27 |
| PRR4 | AC012291. 1 | 0. 575 | 3. 12E-37 |
| PRR4 | AC092800. 1 | 0. 596 | 1. 23E-40 |
| PRR4 | AL158071. 4 | 0. 51  | 2. 32E-28 |
| PRR4 | AC018552. 4 | 0. 523 | 5. 67E-30 |
| PRR4 | AC023794. 1 | 0. 529 | 9. 66E-31 |
| PRR4 | KIZ-AS1     | 0. 574 | 3. 62E-37 |
| PRR4 | TRMT2B-AS1  | 0. 528 | 1. 07E-30 |
| PRR4 | AC111170. 1 | 0. 608 | 1. 48E-42 |
| PRR4 | AC007378. 1 | 0. 564 | 1. 21E-35 |
| PRR4 | AC078962. 3 | 0. 551 | 8. 48E-34 |
| PRR4 | AC138150. 1 | 0. 592 | 6. 02E-40 |
| PRR4 | AC018410. 1 | 0. 568 | 2. 75E-36 |
| PRR4 | AC125793. 1 | 0. 511 | 1. 45E-28 |
| PRR4 | AC009686. 1 | 0. 553 | 4. 01E-34 |
| PRR4 | AL162386. 2 | 0. 554 | 3. 74E-34 |
| PRR4 | FOXP1-AS1   | 0. 564 | 1. 45E-35 |
| PRR4 | AC022173. 1 | 0. 601 | 1. 91E-41 |
| PRR4 | CARS-AS1    | 0. 609 | 9. 68E-43 |
| PRR4 | AL160163. 1 | 0. 54  | 3. 10E-32 |
| PRR4 | AC002558. 2 | 0. 602 | 1. 25E-41 |
| PRR4 | LNK1-AS1    | 0. 565 | 8. 21E-36 |
| PRR4 | AC019130. 1 | 0. 605 | 3. 87E-42 |
| PRR4 | AP005432. 1 | 0. 501 | 2. 60E-27 |
| PRR4 | AF131215. 2 | 0. 582 | 2. 00E-38 |
| PRR4 | AC009480. 1 | 0. 606 | 3. 04E-42 |
| PRR4 | DLEU2L      | 0. 558 | 9. 70E-35 |
| PRR4 | AC100827. 4 | 0. 533 | 2. 92E-31 |
| PRR4 | FAM53B-AS1  | 0. 663 | 5. 37E-53 |
| PRR4 | AC091231. 1 | 0. 614 | 1. 10E-43 |
| PRR4 | AC100774. 1 | 0. 645 | 2. 75E-49 |
| PRR4 | AC139792. 1 | 0. 622 | 4. 69E-45 |
| PRR4 | AC107982. 2 | 0. 511 | 1. 65E-28 |
| PRR4 | AL157392. 1 | 0. 506 | 7. 08E-28 |
| PRR4 | AC017101. 1 | 0. 602 | 1. 46E-41 |
| PRR4 | AL139193. 1 | 0. 577 | 1. 61E-37 |

|      |             |        |           |
|------|-------------|--------|-----------|
| PRR4 | AC002347. 2 | 0. 58  | 5. 23E-38 |
| PRR4 | AL161757. 2 | 0. 576 | 1. 69E-37 |
| PRR4 | AL133243. 3 | 0. 506 | 6. 48E-28 |
| PRR4 | AC007673. 1 | 0. 584 | 9. 60E-39 |
| PRR4 | MAST4-IT1   | 0. 566 | 5. 82E-36 |
| PRR4 | AF178030. 1 | 0. 513 | 9. 79E-29 |
| PRR4 | AL662889. 1 | 0. 565 | 9. 48E-36 |
| PRR4 | PHACTR2-AS1 | 0. 615 | 9. 28E-44 |
| PRR4 | NAV2-AS5    | 0. 538 | 6. 13E-32 |
| PRR4 | AC100830. 2 | 0. 501 | 2. 56E-27 |
| PRR4 | AC021237. 1 | 0. 577 | 1. 19E-37 |
| PRR4 | AC022973. 2 | 0. 613 | 1. 66E-43 |
| PRR4 | FOXP1-IT1   | 0. 627 | 5. 55E-46 |
| PRR4 | AC013356. 3 | 0. 545 | 5. 82E-33 |
| PRR4 | AC092839. 2 | 0. 543 | 1. 26E-32 |
| PRR4 | AC037487. 1 | 0. 568 | 2. 84E-36 |
| PRR4 | AL450226. 1 | 0. 621 | 8. 33E-45 |
| PRR4 | AL118556. 1 | 0. 523 | 4. 69E-30 |
| PRR4 | AP003397. 1 | 0. 603 | 1. 07E-41 |
| PRR4 | LINC01209   | 0. 51  | 2. 23E-28 |
| PRR4 | AC025043. 1 | 0. 572 | 8. 16E-37 |
| PRR4 | AC104984. 3 | 0. 54  | 3. 03E-32 |
| PRR4 | AL360268. 1 | 0. 581 | 3. 49E-38 |
| PRR4 | LZTS1-AS1   | 0. 585 | 8. 44E-39 |
| PRR4 | AC020913. 3 | 0. 526 | 2. 22E-30 |
| PRR4 | AL161909. 2 | 0. 591 | 9. 29E-40 |
| PRR4 | AL354893. 2 | 0. 525 | 2. 84E-30 |
| PRR4 | AC087893. 1 | 0. 526 | 1. 90E-30 |
| PRR4 | AL031428. 1 | 0. 572 | 7. 50E-37 |
| PRR4 | AL356805. 1 | 0. 602 | 1. 30E-41 |
| PRR4 | LINC01355   | 0. 506 | 6. 95E-28 |
| PRR4 | RHOA-IT1    | 0. 587 | 4. 05E-39 |
| PRR4 | AC092669. 1 | 0. 538 | 4. 71E-32 |
| PRR4 | FP325330. 3 | 0. 531 | 4. 90E-31 |
| PRR4 | AC099313. 1 | 0. 528 | 1. 24E-30 |
| PRR4 | AC015845. 1 | 0. 635 | 1. 93E-47 |
| PRR4 | COL18A1-AS1 | 0. 574 | 4. 34E-37 |
| PRR4 | AC087721. 1 | 0. 525 | 3. 16E-30 |
| PRR4 | AC022447. 3 | 0. 501 | 2. 34E-27 |
| PRR4 | AC048380. 1 | 0. 545 | 6. 09E-33 |
| PRR4 | AC078778. 2 | 0. 608 | 1. 11E-42 |
| PRR4 | AC007598. 1 | 0. 61  | 6. 48E-43 |
| PRR4 | AC007619. 1 | 0. 604 | 6. 88E-42 |
| PRR4 | AC005344. 1 | 0. 614 | 1. 08E-43 |

|      |                |        |           |
|------|----------------|--------|-----------|
| PRR4 | AC015971. 1    | 0. 641 | 1. 11E-48 |
| PRR4 | AC022537. 1    | 0. 522 | 6. 84E-30 |
| PRR4 | AC092067. 1    | 0. 581 | 3. 27E-38 |
| PRR4 | AC023830. 1    | 0. 564 | 1. 41E-35 |
| PRR4 | AL138820. 1    | 0. 507 | 5. 15E-28 |
| PRR4 | CTD-2350J17. 1 | 0. 61  | 6. 88E-43 |
| PRR4 | AC011379. 1    | 0. 628 | 3. 81E-46 |
| PRR4 | BTBD9-AS1      | 0. 584 | 1. 21E-38 |
| PRR4 | AC010210. 1    | 0. 534 | 1. 79E-31 |
| PRR4 | AC018410. 2    | 0. 515 | 5. 27E-29 |
| PRR4 | AL355075. 4    | 0. 588 | 2. 86E-39 |
| PRR4 | AC009095. 1    | 0. 598 | 5. 94E-41 |
| PRR4 | AC005726. 3    | 0. 647 | 9. 09E-50 |
| PRR4 | AL162390. 1    | 0. 555 | 2. 79E-34 |
| PRR4 | AC018878. 1    | 0. 618 | 2. 66E-44 |
| PRR4 | AC068790. 4    | 0. 517 | 2. 75E-29 |
| PRR4 | AL162171. 3    | 0. 578 | 9. 01E-38 |
| PRR4 | F0393419. 2    | 0. 598 | 6. 13E-41 |
| PRR4 | AL355336. 1    | 0. 613 | 1. 63E-43 |
| PRR4 | AC023794. 4    | 0. 595 | 2. 09E-40 |
| PRR4 | CACNA1C-AS4    | 0. 622 | 5. 51E-45 |
| PRR4 | AC112512. 1    | 0. 539 | 4. 18E-32 |
| PRR4 | DENND6A-AS1    | 0. 517 | 3. 01E-29 |
| PRR4 | SYNJ2-IT1      | 0. 587 | 4. 53E-39 |
| PRR4 | AP003168. 2    | 0. 614 | 1. 15E-43 |
| PRR4 | AC021739. 4    | 0. 606 | 3. 04E-42 |
| PRR4 | AC055811. 3    | 0. 602 | 1. 19E-41 |
| PRR4 | AC068790. 2    | 0. 578 | 9. 94E-38 |
| PRR4 | AC009119. 3    | 0. 524 | 3. 76E-30 |
| PRR4 | AC002064. 2    | 0. 547 | 3. 47E-33 |
| PRR4 | AC016644. 1    | 0. 608 | 1. 31E-42 |
| PRR4 | AC116903. 2    | 0. 526 | 2. 13E-30 |
| PRR4 | AC068790. 6    | 0. 559 | 7. 72E-35 |
| PRR4 | LINC02160      | 0. 536 | 9. 65E-32 |
| PRR4 | AL512656. 1    | 0. 552 | 6. 15E-34 |
| PRR4 | ZMYM4-AS1      | 0. 608 | 1. 62E-42 |
| PRR4 | LINC00624      | 0. 509 | 2. 61E-28 |
| PRR4 | AP001442. 1    | 0. 614 | 1. 26E-43 |
| PRR4 | AC016027. 3    | 0. 535 | 1. 40E-31 |
| PRR4 | AC025034. 1    | 0. 597 | 9. 04E-41 |
| PRR4 | AC020612. 3    | 0. 604 | 7. 16E-42 |
| PRR4 | AC131571. 1    | 0. 521 | 8. 41E-30 |
| PRR4 | AL355916. 2    | 0. 529 | 7. 45E-31 |
| PRR4 | AC116535. 2    | 0. 528 | 1. 08E-30 |

|      |             |        |           |
|------|-------------|--------|-----------|
| PRR4 | AC078883. 2 | 0. 599 | 4. 04E-41 |
| PRR4 | AL096869. 1 | 0. 56  | 4. 79E-35 |
| PRR4 | AC060809. 1 | 0. 571 | 1. 17E-36 |
| PRR4 | SHANK2-AS1  | 0. 539 | 4. 36E-32 |
| PRR4 | AC008243. 1 | 0. 529 | 7. 95E-31 |
| PRR4 | AC007362. 1 | 0. 52  | 1. 21E-29 |
| PRR4 | AC055733. 2 | 0. 558 | 9. 58E-35 |
| PRR4 | AL513523. 3 | 0. 52  | 1. 23E-29 |
| PRR4 | AL591623. 1 | 0. 623 | 3. 49E-45 |
| PRR4 | AL353804. 2 | 0. 66  | 2. 36E-52 |
| PRR4 | ZBTB20-AS3  | 0. 615 | 9. 74E-44 |
| PRR4 | SEMA5A-AS1  | 0. 563 | 1. 81E-35 |
| PRR4 | AC008264. 2 | 0. 601 | 1. 97E-41 |
| PRR4 | AC068790. 3 | 0. 521 | 9. 38E-30 |
| PRR4 | AC022558. 1 | 0. 556 | 1. 98E-34 |
| PRR4 | AL035588. 1 | 0. 586 | 6. 40E-39 |
| PRR4 | AC087241. 4 | 0. 584 | 1. 00E-38 |
| PRR4 | MYLK-AS2    | 0. 502 | 2. 25E-27 |
| PRR4 | AC009464. 1 | 0. 574 | 4. 53E-37 |
| PRR4 | AC069542. 1 | 0. 547 | 3. 16E-33 |
| PRR4 | Z99289. 3   | 0. 603 | 8. 86E-42 |
| PRR4 | AC007599. 2 | 0. 619 | 1. 54E-44 |
| PRR4 | AC010307. 3 | 0. 548 | 2. 31E-33 |
| PRR4 | AC087761. 1 | 0. 572 | 7. 71E-37 |
| PRR4 | AC005757. 1 | 0. 587 | 3. 99E-39 |
| PRR4 | AC004593. 1 | 0. 636 | 1. 33E-47 |
| PRR4 | FTX         | 0. 661 | 1. 76E-52 |
| PRR4 | AC118555. 1 | 0. 569 | 2. 27E-36 |
| PRR4 | AC012409. 2 | 0. 548 | 2. 27E-33 |
| PRR4 | AC007496. 1 | 0. 574 | 4. 09E-37 |
| PRR4 | AC072022. 2 | 0. 536 | 1. 08E-31 |
| PRR4 | MALAT1      | 0. 553 | 5. 21E-34 |
| PRR4 | MAGI1-AS1   | 0. 622 | 4. 55E-45 |
| PRR4 | LINC01878   | 0. 548 | 2. 23E-33 |
| PRR4 | AC108063. 1 | 0. 553 | 4. 29E-34 |
| PRR4 | BICRA-AS1   | 0. 572 | 7. 60E-37 |
| PRR4 | AC009303. 3 | 0. 567 | 5. 22E-36 |
| PRR4 | MYCBP2-AS1  | 0. 616 | 6. 70E-44 |
| PRR4 | AC073569. 3 | 0. 597 | 1. 02E-40 |
| PRR4 | AP000941. 1 | 0. 609 | 9. 27E-43 |
| PRR4 | AC011939. 2 | 0. 594 | 3. 15E-40 |
| PRR4 | AL356022. 1 | 0. 502 | 1. 93E-27 |
| PRR4 | DLEU1-AS1   | 0. 576 | 2. 20E-37 |
| PRR4 | AC087294. 1 | 0. 563 | 1. 46E-35 |

|      |             |        |           |
|------|-------------|--------|-----------|
| PRR4 | AC136424. 1 | 0. 611 | 4. 09E-43 |
| PRR4 | MYCBP2-AS2  | 0. 596 | 1. 21E-40 |
| PRR4 | AC090802. 1 | 0. 538 | 5. 38E-32 |
| PRR4 | AL390208. 1 | 0. 561 | 3. 45E-35 |
| PRR4 | AL645504. 1 | 0. 515 | 5. 24E-29 |
| PRR4 | AC018462. 1 | 0. 582 | 2. 32E-38 |
| PRR4 | AC138956. 2 | 0. 526 | 2. 41E-30 |
| PRR4 | ACAP2-IT1   | 0. 585 | 9. 36E-39 |
| PRR4 | AL031594. 1 | 0. 641 | 1. 21E-48 |
| PRR4 | AC092574. 2 | 0. 67  | 1. 48E-54 |
| PRR4 | STARD13-AS  | 0. 567 | 4. 13E-36 |
| PRR4 | ASTN2-AS1   | 0. 616 | 5. 72E-44 |
| PRR4 | SPRY4-IT1   | 0. 536 | 9. 90E-32 |
| PRR4 | AC091185. 1 | 0. 544 | 7. 76E-33 |
| PRR4 | AC005072. 1 | 0. 616 | 5. 91E-44 |
| PRR4 | AL445223. 1 | 0. 622 | 4. 44E-45 |
| PRR4 | MIR381HG    | 0. 524 | 3. 59E-30 |
| PRR4 | PCCA-AS1    | 0. 641 | 1. 31E-48 |
| PRR4 | AC103739. 1 | 0. 526 | 1. 90E-30 |
| PRR4 | AC064874. 1 | 0. 637 | 9. 06E-48 |
| PRR4 | AL513412. 1 | 0. 595 | 2. 14E-40 |
| PRR4 | AC008649. 2 | 0. 552 | 7. 32E-34 |
| PRR4 | AP001469. 1 | 0. 523 | 5. 62E-30 |
| PRR4 | AC079203. 2 | 0. 532 | 3. 44E-31 |
| PRR4 | AC022400. 2 | 0. 615 | 9. 22E-44 |
| PRR4 | TTC21B-AS1  | 0. 623 | 3. 37E-45 |
| PRR4 | DAPK1-IT1   | 0. 621 | 7. 00E-45 |
| PRR4 | AC211433. 1 | 0. 566 | 5. 89E-36 |
| PRR4 | AC008147. 1 | 0. 524 | 4. 36E-30 |
| PRR4 | AL139353. 2 | 0. 517 | 2. 98E-29 |
| PRR4 | ITCH-IT1    | 0. 55  | 1. 23E-33 |
| PRR4 | AP005131. 1 | 0. 532 | 3. 14E-31 |
| PRR4 | AL136979. 1 | 0. 573 | 6. 19E-37 |
| PRR4 | CFAP44-AS1  | 0. 519 | 1. 46E-29 |
| PRR4 | AC130895. 1 | 0. 624 | 2. 30E-45 |
| PRR4 | CLYBL-AS1   | 0. 503 | 1. 60E-27 |
| PRR4 | AC105339. 2 | 0. 556 | 1. 92E-34 |
| PRR4 | ELM01-AS1   | 0. 522 | 7. 81E-30 |
| PRR4 | TH2LCRR     | 0. 535 | 1. 57E-31 |
| PRR4 | AC007000. 3 | 0. 501 | 2. 73E-27 |
| PRR4 | FBXW7-AS1   | 0. 582 | 2. 66E-38 |
| PRR4 | AL136988. 2 | 0. 601 | 2. 18E-41 |
| PRR4 | AL035634. 1 | 0. 6   | 2. 71E-41 |
| PRR4 | AC114737. 1 | 0. 582 | 2. 71E-38 |

|      |              |        |           |
|------|--------------|--------|-----------|
| PRR4 | AL365356. 1  | 0. 642 | 7. 36E-49 |
| PRR4 | AC078795. 1  | 0. 611 | 4. 91E-43 |
| PRR4 | AC025031. 4  | 0. 654 | 3. 72E-51 |
| PRR4 | AC009120. 4  | 0. 511 | 1. 81E-28 |
| PRR4 | AC009054. 1  | 0. 537 | 7. 54E-32 |
| PRR4 | UST-AS1      | 0. 537 | 6. 58E-32 |
| PRR4 | AC211476. 2  | 0. 523 | 5. 01E-30 |
| PRR4 | AC005746. 1  | 0. 554 | 3. 36E-34 |
| PRR4 | AC012613. 2  | 0. 576 | 2. 26E-37 |
| PRR4 | AC010776. 1  | 0. 566 | 6. 83E-36 |
| PRR4 | AC017006. 2  | 0. 51  | 2. 19E-28 |
| PRR4 | AL078581. 3  | 0. 547 | 3. 73E-33 |
| PRR4 | AC018946. 1  | 0. 594 | 3. 07E-40 |
| PRR4 | AC011586. 1  | 0. 509 | 3. 14E-28 |
| PRR4 | AC016229. 1  | 0. 555 | 2. 26E-34 |
| PRR4 | C9orf41-AS1  | 0. 618 | 2. 43E-44 |
| PRR4 | AL157871. 5  | 0. 599 | 4. 23E-41 |
| PRR4 | AC108102. 1  | 0. 632 | 6. 28E-47 |
| PRR4 | AC134407. 1  | 0. 59  | 1. 28E-39 |
| PRR4 | AC027018. 1  | 0. 649 | 3. 74E-50 |
| PRR4 | AC087362. 1  | 0. 556 | 2. 03E-34 |
| PRR4 | AC020661. 3  | 0. 632 | 6. 45E-47 |
| PRR4 | NAALADL2-AS3 | 0. 559 | 6. 08E-35 |
| PRR4 | AL359095. 1  | 0. 592 | 5. 11E-40 |
| PRR4 | AC069257. 1  | 0. 522 | 7. 70E-30 |
| PRR4 | TTLL7-IT1    | 0. 514 | 6. 83E-29 |
| PRR4 | NPTN-IT1     | 0. 56  | 4. 27E-35 |
| PRR4 | AC080162. 1  | 0. 604 | 7. 46E-42 |
| PRR4 | PLCE1-AS2    | 0. 541 | 2. 17E-32 |
| PRR4 | AC027514. 2  | 0. 615 | 9. 73E-44 |
| PRR4 | AC016831. 5  | 0. 607 | 2. 16E-42 |
| PRR4 | AC011284. 1  | 0. 538 | 5. 24E-32 |
| PRR4 | PRICKLE2-AS1 | 0. 555 | 2. 87E-34 |
| PRR4 | ERI3-IT1     | 0. 578 | 1. 13E-37 |
| PRR4 | AC138028. 1  | 0. 54  | 2. 62E-32 |
| PRR4 | AC004672. 1  | 0. 643 | 6. 59E-49 |
| PRR4 | AC079866. 2  | 0. 589 | 1. 85E-39 |
| PRR4 | KDM5C-IT1    | 0. 588 | 3. 17E-39 |
| PRR4 | AC027796. 5  | 0. 533 | 2. 63E-31 |
| PRR4 | AC004672. 2  | 0. 589 | 1. 58E-39 |
| PRR4 | AC068025. 2  | 0. 566 | 7. 01E-36 |
| PRR4 | AL035448. 1  | 0. 612 | 3. 14E-43 |
| PRR4 | AC008592. 2  | 0. 52  | 1. 27E-29 |
| PRR4 | AL360169. 2  | 0. 634 | 3. 53E-47 |



|      |              |       |          |
|------|--------------|-------|----------|
| PRR4 | LINC01362    | 0.577 | 1.19E-37 |
| PRR4 | AC131971.1   | 0.649 | 3.82E-50 |
| PRR4 | AC012157.1   | 0.54  | 2.97E-32 |
| PRR4 | RC3H1-IT1    | 0.598 | 5.76E-41 |
| PRR4 | AC079915.1   | 0.622 | 4.65E-45 |
| PRR4 | GRK5-IT1     | 0.541 | 1.93E-32 |
| PRR4 | AC103876.1   | 0.566 | 6.29E-36 |
| PRR4 | AC008770.4   | 0.523 | 4.51E-30 |
| PRR4 | AP001178.2   | 0.586 | 6.49E-39 |
| PRR4 | AC005920.2   | 0.624 | 2.19E-45 |
| PRR4 | Z99127.1     | 0.552 | 5.94E-34 |
| PRR4 | PLCB1-IT1    | 0.63  | 1.38E-46 |
| PRR4 | AC069079.1   | 0.548 | 2.24E-33 |
| PRR4 | AC130650.1   | 0.573 | 4.94E-37 |
| PRR4 | AL596247.1   | 0.533 | 2.39E-31 |
| PRR4 | AC011933.4   | 0.539 | 3.70E-32 |
| PRR4 | AL591721.1   | 0.505 | 8.78E-28 |
| PRR4 | RMRP         | 0.583 | 1.87E-38 |
| PRR4 | AL049840.5   | 0.505 | 9.18E-28 |
| PRR4 | AL136115.2   | 0.607 | 2.20E-42 |
| PRR4 | AL161644.1   | 0.598 | 5.60E-41 |
| PRR4 | AC020978.2   | 0.511 | 1.49E-28 |
| PRR4 | AC008543.5   | 0.503 | 1.56E-27 |
| PRR4 | AC108463.3   | 0.613 | 1.55E-43 |
| PRR4 | TBC1D22A-AS1 | 0.628 | 3.40E-46 |
| PRR4 | LINC01803    | 0.539 | 3.68E-32 |
| PRR4 | AL133260.2   | 0.578 | 9.19E-38 |
| PRR4 | U73169.1     | 0.602 | 1.30E-41 |
| PRR4 | AL031666.3   | 0.568 | 2.94E-36 |
| PRR4 | AC135782.3   | 0.52  | 1.39E-29 |
| PRR4 | AC091059.1   | 0.529 | 8.19E-31 |
| PRR4 | AL022097.1   | 0.576 | 1.78E-37 |
| PRR4 | AL162274.1   | 0.519 | 1.48E-29 |
| PRR4 | AC037487.2   | 0.615 | 8.62E-44 |
| PRR4 | AC011753.2   | 0.613 | 1.77E-43 |
| PRR4 | Z95331.1     | 0.686 | 5.37E-58 |
| PRR4 | AC103739.2   | 0.597 | 9.83E-41 |
| PRR4 | CSNK1G2-AS1  | 0.585 | 8.07E-39 |
| PRR4 | AC114760.2   | 0.551 | 8.12E-34 |
| PRR4 | AC079385.1   | 0.518 | 2.18E-29 |
| PRR4 | AL450344.2   | 0.596 | 1.29E-40 |
| PRR4 | ANKRD44-IT1  | 0.55  | 1.21E-33 |
| PRR4 | AC005695.2   | 0.599 | 4.14E-41 |
| PRR4 | AC020661.4   | 0.592 | 6.12E-40 |

|      |             |        |           |
|------|-------------|--------|-----------|
| PRR4 | AL096869. 2 | 0. 574 | 4. 17E-37 |
| PRR4 | FAM13A-AS1  | 0. 517 | 3. 00E-29 |
| PRR4 | WASHC5-AS1  | 0. 595 | 1. 69E-40 |
| PRR4 | LYST-AS1    | 0. 558 | 8. 68E-35 |
| PRR4 | HMBOX1-IT1  | 0. 558 | 9. 31E-35 |
| PRR4 | AL031717. 1 | 0. 511 | 1. 55E-28 |
| PRR4 | AL360091. 2 | 0. 607 | 1. 97E-42 |
| PRR4 | AL132989. 2 | 0. 725 | 8. 09E-68 |
| PRR4 | AC009884. 1 | 0. 541 | 2. 41E-32 |
| PRR4 | AC092802. 3 | 0. 544 | 8. 71E-33 |
| PRR4 | AL513365. 2 | 0. 516 | 4. 33E-29 |
| PRR4 | AL162724. 1 | 0. 567 | 5. 11E-36 |
| PRR4 | AC024145. 1 | 0. 569 | 2. 63E-36 |
| PRR4 | AC106037. 1 | 0. 501 | 2. 71E-27 |
| PRR4 | AC100778. 1 | 0. 534 | 1. 63E-31 |
| PRR4 | FP325332. 1 | 0. 642 | 9. 01E-49 |
| PRR4 | AC092338. 1 | 0. 537 | 7. 19E-32 |
| PRR4 | AC244093. 3 | 0. 538 | 5. 63E-32 |
| PRR4 | AL807757. 1 | 0. 615 | 6. 90E-44 |
| PRR4 | AC090971. 5 | 0. 502 | 1. 99E-27 |
| PRR4 | AMMECR1-IT1 | 0. 613 | 2. 13E-43 |
| PRR4 | AL133230. 1 | 0. 591 | 7. 95E-40 |
| PRR4 | AC007601. 2 | 0. 566 | 5. 39E-36 |
| PRR4 | AC091053. 2 | 0. 629 | 2. 09E-46 |
| PRR4 | AC006141. 1 | 0. 632 | 5. 79E-47 |
| PRR4 | AL592430. 1 | 0. 572 | 8. 02E-37 |
| PRR4 | AC087501. 1 | 0. 618 | 1. 98E-44 |
| PRR4 | RDH10-AS1   | 0. 549 | 1. 68E-33 |
| PRR4 | AC003101. 1 | 0. 559 | 6. 75E-35 |
| PRR4 | AC022001. 2 | 0. 554 | 3. 69E-34 |
| PRR4 | AC100763. 1 | 0. 627 | 6. 58E-46 |
| PRR4 | AC073592. 1 | 0. 509 | 2. 53E-28 |
| PRR4 | AC096733. 1 | 0. 628 | 3. 64E-46 |
| PRR4 | AC005520. 3 | 0. 611 | 3. 58E-43 |
| PRR4 | AC008731. 1 | 0. 53  | 5. 58E-31 |
| PRR4 | AC005480. 1 | 0. 627 | 5. 61E-46 |
| PRR4 | XIAP-AS1    | 0. 632 | 6. 44E-47 |
| PRR4 | AC007431. 1 | 0. 581 | 3. 06E-38 |
| PRR4 | AL355075. 2 | 0. 504 | 1. 19E-27 |
| PRR4 | AC107909. 1 | 0. 622 | 3. 91E-45 |
| PRR4 | AP000919. 2 | 0. 614 | 1. 49E-43 |
| PRR4 | AL357093. 2 | 0. 625 | 1. 49E-45 |
| PRR4 | AC138393. 3 | 0. 588 | 2. 74E-39 |
| PRR4 | AL121895. 1 | 0. 572 | 7. 39E-37 |

|      |             |        |           |
|------|-------------|--------|-----------|
| PRR4 | AC012100. 2 | 0. 541 | 2. 22E-32 |
| PRR4 | AL050331. 3 | 0. 514 | 7. 81E-29 |
| PRR4 | AC116096. 1 | 0. 536 | 1. 09E-31 |
| PRR4 | CASC17      | 0. 506 | 6. 39E-28 |
| PRR4 | MKNK1-AS1   | 0. 559 | 7. 16E-35 |
| PRR4 | AC000120. 1 | 0. 647 | 7. 65E-50 |
| PRR4 | AP002884. 5 | 0. 553 | 4. 36E-34 |
| PRR4 | LINC00102   | 0. 59  | 1. 16E-39 |
| PRR4 | AC008937. 2 | 0. 608 | 1. 12E-42 |
| PRR4 | AL583722. 4 | 0. 54  | 3. 27E-32 |
| PRR4 | MANEA-AS1   | 0. 518 | 2. 06E-29 |
| PRR4 | AC011466. 2 | 0. 548 | 2. 42E-33 |
| PRR4 | Z93022. 1   | 0. 553 | 4. 97E-34 |
| PRR4 | AL157832. 2 | 0. 555 | 2. 10E-34 |
| PRR4 | AC130651. 2 | 0. 581 | 3. 35E-38 |
| PRR4 | ARHGEF3-AS1 | 0. 623 | 2. 95E-45 |
| PRR4 | AC096947. 1 | 0. 588 | 2. 43E-39 |
| PRR4 | AC004594. 1 | 0. 557 | 1. 22E-34 |
| PRR4 | AL133481. 1 | 0. 621 | 5. 85E-45 |
| PRR4 | AL442071. 1 | 0. 548 | 2. 56E-33 |
| PRR4 | AL023581. 1 | 0. 606 | 3. 02E-42 |
| PRR4 | AL121652. 1 | 0. 605 | 4. 14E-42 |
| PRR4 | AC099811. 1 | 0. 59  | 1. 35E-39 |
| PRR4 | AC008467. 1 | 0. 505 | 8. 66E-28 |
| PRR4 | AC011092. 2 | 0. 548 | 2. 11E-33 |
| PRR4 | AC008750. 5 | 0. 558 | 9. 45E-35 |
| PRR4 | IN080-AS1   | 0. 528 | 1. 14E-30 |
| PRR4 | AC092608. 1 | 0. 515 | 5. 55E-29 |
| PRR4 | BIRC6-AS1   | 0. 632 | 7. 11E-47 |
| PRR4 | AC013286. 1 | 0. 628 | 4. 32E-46 |
| PRR4 | WWOX-AS1    | 0. 599 | 4. 07E-41 |
| PRR4 | LIMS1-AS1   | 0. 532 | 3. 10E-31 |
| PRR4 | SMAD1-AS1   | 0. 592 | 6. 34E-40 |
| PRR4 | MAMDC2-AS1  | 0. 553 | 4. 31E-34 |
| PRR4 | AC015849. 4 | 0. 595 | 1. 83E-40 |
| PRR4 | AC087521. 2 | 0. 608 | 1. 14E-42 |
| PRR4 | AC100800. 1 | 0. 562 | 2. 74E-35 |
| PRR4 | AC011595. 1 | 0. 567 | 4. 05E-36 |
| PRR4 | AC012404. 1 | 0. 541 | 1. 93E-32 |
| PRR4 | LARGE-IT1   | 0. 557 | 1. 45E-34 |
| PRR4 | AL133343. 3 | 0. 504 | 1. 02E-27 |
| PRR4 | AC097382. 1 | 0. 541 | 2. 16E-32 |
| PRR4 | SNAP47-AS1  | 0. 549 | 1. 48E-33 |
| PRR4 | AC007598. 2 | 0. 57  | 1. 86E-36 |

|      |              |       |          |
|------|--------------|-------|----------|
| PRR4 | TMLHE-AS1    | 0.535 | 1.37E-31 |
| PRR4 | EFCAB14-AS1  | 0.551 | 7.92E-34 |
| PRR4 | AC024619.3   | 0.512 | 1.34E-28 |
| PRR4 | AL353801.2   | 0.555 | 2.66E-34 |
| PRR4 | AL049637.1   | 0.633 | 4.07E-47 |
| PRR4 | BACH1-IT3    | 0.554 | 3.76E-34 |
| PRR4 | AC114763.2   | 0.642 | 9.53E-49 |
| PRR4 | RASA2-IT1    | 0.552 | 6.77E-34 |
| PRR4 | AL354726.1   | 0.6   | 2.47E-41 |
| PRR4 | AC131934.1   | 0.565 | 9.44E-36 |
| PRR4 | AL161907.1   | 0.515 | 4.52E-29 |
| PRR4 | WDFY3-AS1    | 0.513 | 8.59E-29 |
| PRR4 | AC023632.5   | 0.513 | 9.72E-29 |
| PRR4 | AC008474.1   | 0.539 | 4.45E-32 |
| PRR4 | AC055764.1   | 0.534 | 1.97E-31 |
| PRR4 | AC069208.1   | 0.528 | 1.31E-30 |
| PRR4 | MAGI1-IT1    | 0.552 | 6.26E-34 |
| PRR4 | AC010320.4   | 0.676 | 7.02E-56 |
| PRR4 | AL445465.1   | 0.521 | 8.78E-30 |
| PRR4 | AC055811.1   | 0.553 | 5.46E-34 |
| PRR4 | AP000654.1   | 0.575 | 2.58E-37 |
| PRR4 | ALG9-IT1     | 0.613 | 1.72E-43 |
| PRR4 | AL360091.3   | 0.555 | 2.17E-34 |
| PRR4 | AC013652.2   | 0.565 | 8.50E-36 |
| PRR4 | AC092794.2   | 0.531 | 5.29E-31 |
| PRR4 | AC104232.2   | 0.568 | 3.18E-36 |
| PRR4 | AC116158.1   | 0.599 | 4.77E-41 |
| PRR4 | AC087286.4   | 0.587 | 3.23E-39 |
| PRR4 | AC079035.1   | 0.598 | 6.96E-41 |
| PRR4 | AC092892.1   | 0.536 | 9.55E-32 |
| PRR4 | RABGAP1L-IT1 | 0.522 | 5.93E-30 |
| PRR4 | N4BP2L2-IT2  | 0.567 | 4.98E-36 |
| PRR4 | E2F3-IT1     | 0.552 | 6.72E-34 |
| PRR4 | AL390774.2   | 0.616 | 4.94E-44 |
| PRR4 | AC016910.1   | 0.61  | 6.55E-43 |
| PRR4 | AC092794.1   | 0.501 | 2.88E-27 |
| PRR4 | LINC02443    | 0.533 | 2.35E-31 |
| PRR4 | AC008737.1   | 0.508 | 4.06E-28 |
| PRR4 | AL357568.1   | 0.509 | 3.05E-28 |
| PRR4 | AC068389.4   | 0.632 | 6.43E-47 |
| PRR4 | OPA1-AS1     | 0.655 | 2.00E-51 |
| PRR4 | AL031772.1   | 0.637 | 7.45E-48 |
| PRR4 | AL136984.1   | 0.66  | 2.58E-52 |
| PRR4 | AC024267.5   | 0.632 | 5.84E-47 |

|      |            |       |          |
|------|------------|-------|----------|
| PRR4 | ALG13-AS1  | 0.52  | 1.19E-29 |
| PRR4 | THRA1/BTR  | 0.558 | 1.02E-34 |
| PRR4 | AC073487.1 | 0.586 | 5.52E-39 |
| PRR4 | AC022272.1 | 0.551 | 8.95E-34 |
| PRR4 | AC027228.1 | 0.59  | 1.20E-39 |
| PRR4 | AC016292.1 | 0.564 | 1.11E-35 |
| PRR4 | AC098869.2 | 0.551 | 1.02E-33 |
| PRR4 | AC096558.2 | 0.527 | 1.41E-30 |
| PRR4 | AL035071.2 | 0.593 | 4.67E-40 |
| PRR4 | AC144521.1 | 0.516 | 4.38E-29 |
| PRR4 | AC023510.1 | 0.549 | 1.70E-33 |
| PRR4 | AL606534.2 | 0.513 | 9.24E-29 |
| PRR4 | ATP11A-AS1 | 0.523 | 5.08E-30 |
| PRR4 | AL451062.1 | 0.519 | 1.51E-29 |
| PRR4 | PLS1-AS1   | 0.537 | 8.12E-32 |
| PRR4 | AL133406.2 | 0.524 | 4.18E-30 |
| PRR4 | AC015563.2 | 0.531 | 5.04E-31 |
| PRR4 | AC009142.1 | 0.576 | 2.20E-37 |
| PRR4 | AC007533.1 | 0.599 | 3.76E-41 |
| PRR4 | ZBTB20-AS4 | 0.579 | 7.17E-38 |
| PRR4 | INTS9-AS1  | 0.534 | 1.76E-31 |
| PRR4 | AC090213.1 | 0.56  | 5.50E-35 |
| PRR4 | AC090739.1 | 0.525 | 2.56E-30 |
| PRR4 | AC008957.2 | 0.542 | 1.45E-32 |
| PRR4 | AL513327.1 | 0.569 | 1.98E-36 |
| PRR4 | AC127024.4 | 0.515 | 4.70E-29 |
| PRR4 | AC097103.1 | 0.508 | 3.44E-28 |
| PRR4 | MIR181A1HG | 0.507 | 4.50E-28 |
| PRR4 | AL450306.1 | 0.569 | 1.91E-36 |
| PRR4 | AL360093.1 | 0.602 | 1.38E-41 |
| PRR4 | AC022400.5 | 0.506 | 5.93E-28 |
| PRR4 | AC111170.2 | 0.541 | 1.96E-32 |
| PRR4 | AL445931.1 | 0.526 | 1.90E-30 |
| PRR4 | AC103810.2 | 0.566 | 6.64E-36 |
| PRR4 | AL139407.1 | 0.626 | 7.86E-46 |
| PRR4 | RSF1-IT1   | 0.501 | 2.81E-27 |
| PRR4 | AC090617.1 | 0.591 | 1.02E-39 |
| PRR4 | ZRANB2-AS1 | 0.518 | 2.11E-29 |
| PRR4 | AL118558.1 | 0.522 | 7.59E-30 |
| PRR4 | AC044840.1 | 0.531 | 4.97E-31 |
| PRR4 | AC011933.2 | 0.629 | 2.07E-46 |
| PRR4 | AC092171.1 | 0.521 | 9.02E-30 |
| PRR4 | AC084291.1 | 0.522 | 7.84E-30 |
| PRR4 | CLIP1-AS1  | 0.615 | 8.04E-44 |

|      |             |       |          |
|------|-------------|-------|----------|
| PRR4 | MGC15885    | 0.575 | 2.58E-37 |
| PRR4 | ARAP1-AS2   | 0.595 | 1.63E-40 |
| PRR4 | AL096855.1  | 0.514 | 7.73E-29 |
| PRR4 | AL451047.1  | 0.611 | 4.58E-43 |
| PRR4 | AC087620.1  | 0.6   | 3.07E-41 |
| PRR4 | AC093019.2  | 0.582 | 2.18E-38 |
| PRR4 | SPAG5-AS1   | 0.504 | 1.29E-27 |
| PRR4 | AC010632.2  | 0.543 | 1.12E-32 |
| PRR4 | ATG10-AS1   | 0.551 | 9.78E-34 |
| PRR4 | LINC01359   | 0.607 | 2.35E-42 |
| PRR4 | AL450344.1  | 0.603 | 9.28E-42 |
| PRR4 | AC104958.1  | 0.596 | 1.34E-40 |
| PRR4 | AL049820.1  | 0.611 | 3.57E-43 |
| PRR4 | AL135838.1  | 0.567 | 4.95E-36 |
| PRR4 | AC022540.1  | 0.62  | 1.31E-44 |
| PRR4 | AP005899.1  | 0.501 | 2.33E-27 |
| PRR4 | AL162171.2  | 0.689 | 1.26E-58 |
| PRR4 | AC008781.2  | 0.63  | 1.67E-46 |
| PRR4 | AC012254.3  | 0.643 | 6.14E-49 |
| PRR4 | LINC02465   | 0.526 | 2.08E-30 |
| PRR4 | PSMD6-AS2   | 0.548 | 2.35E-33 |
| PRR4 | AC095033.1  | 0.532 | 3.67E-31 |
| PRR4 | AC024267.4  | 0.522 | 6.69E-30 |
| PRR4 | FAR1-IT1    | 0.515 | 5.37E-29 |
| PRR4 | AP002884.4  | 0.585 | 7.02E-39 |
| PRR4 | AL365258.1  | 0.615 | 7.95E-44 |
| PRR4 | AC013564.1  | 0.633 | 5.44E-47 |
| PRR4 | AC007906.1  | 0.528 | 1.16E-30 |
| PRR4 | AC127024.3  | 0.59  | 1.42E-39 |
| PRR4 | AC063965.1  | 0.634 | 2.57E-47 |
| PRR4 | AP001107.1  | 0.507 | 5.14E-28 |
| PRR4 | AC108727.1  | 0.528 | 1.07E-30 |
| PRR4 | AC079336.3  | 0.552 | 7.46E-34 |
| PRR4 | AC012494.1  | 0.597 | 9.13E-41 |
| PRR4 | AC008147.2  | 0.63  | 2.03E-46 |
| PRR4 | AL353804.1  | 0.512 | 1.29E-28 |
| PRR4 | SHANK2-AS3  | 0.505 | 8.94E-28 |
| PRR4 | TBL1XR1-AS1 | 0.52  | 1.21E-29 |
| PRR4 | AC036103.1  | 0.63  | 1.79E-46 |
| PRR4 | AC004054.1  | 0.577 | 1.51E-37 |
| PRR4 | AC016590.2  | 0.556 | 1.67E-34 |
| PRR4 | ZBTB20-AS2  | 0.57  | 1.71E-36 |
| PRR4 | AL139120.1  | 0.545 | 6.82E-33 |
| PRR4 | AC008885.2  | 0.558 | 1.06E-34 |

|      |             |        |           |
|------|-------------|--------|-----------|
| PRR4 | AC018607. 1 | 0. 552 | 5. 87E-34 |
| PRR4 | AC073575. 1 | 0. 616 | 6. 25E-44 |
| PRR4 | Z98749. 1   | 0. 625 | 1. 29E-45 |
| PRR4 | AC003681. 1 | 0. 672 | 7. 35E-55 |
| PRR4 | AC007494. 2 | 0. 587 | 4. 33E-39 |
| PRR4 | AC008507. 2 | 0. 528 | 1. 01E-30 |
| PRR4 | AC010320. 2 | 0. 537 | 6. 57E-32 |
| PRR4 | PRKCA-AS1   | 0. 571 | 1. 14E-36 |
| PRR4 | AC009269. 3 | 0. 61  | 7. 08E-43 |
| PRR4 | AL133245. 1 | 0. 61  | 5. 64E-43 |
| PRR4 | AC015727. 1 | 0. 528 | 1. 20E-30 |
| PRR4 | AC090607. 1 | 0. 513 | 9. 96E-29 |
| PRR4 | TCEAL3-AS1  | 0. 624 | 2. 45E-45 |
| PRR4 | DANT2       | 0. 585 | 8. 78E-39 |
| PRR4 | AC005912. 2 | 0. 62  | 1. 23E-44 |
| PRR4 | AC007014. 1 | 0. 533 | 2. 41E-31 |
| PRR4 | AC090515. 5 | 0. 555 | 2. 62E-34 |
| PRR4 | AC005899. 5 | 0. 576 | 1. 84E-37 |
| PRR4 | LINC02039   | 0. 51  | 1. 94E-28 |
| PRR4 | AC091906. 1 | 0. 564 | 1. 15E-35 |
| PRR4 | AC090519. 2 | 0. 643 | 5. 56E-49 |
| PRR4 | AC011443. 1 | 0. 545 | 5. 86E-33 |
| PRR4 | AC058791. 1 | 0. 602 | 1. 61E-41 |
| PRR4 | STX18-IT1   | 0. 596 | 1. 21E-40 |
| PRR4 | AP002892. 2 | 0. 591 | 8. 53E-40 |
| PRR4 | AL603756. 1 | 0. 568 | 2. 77E-36 |
| PRR4 | AC018521. 7 | 0. 548 | 2. 39E-33 |
| PRR4 | AL138963. 1 | 0. 601 | 1. 91E-41 |
| PRR4 | LINC02250   | 0. 602 | 1. 55E-41 |
| PRR4 | AC253536. 3 | 0. 524 | 3. 65E-30 |
| PRR4 | AC092120. 1 | 0. 559 | 7. 58E-35 |
| PRR4 | AC093849. 1 | 0. 59  | 1. 06E-39 |
| PRR4 | AC005154. 5 | 0. 511 | 1. 63E-28 |
| PRR4 | AC020611. 2 | 0. 581 | 3. 84E-38 |
| PRR4 | AL024474. 2 | 0. 551 | 9. 00E-34 |
| PRR4 | NCOA7-AS1   | 0. 571 | 1. 20E-36 |
| PRR4 | AC012370. 1 | 0. 586 | 5. 89E-39 |
| PRR4 | AL162584. 1 | 0. 57  | 1. 71E-36 |
| PRR4 | AC021231. 1 | 0. 52  | 1. 11E-29 |
| PRR4 | TET2-AS1    | 0. 555 | 2. 37E-34 |
| PRR4 | AC104982. 2 | 0. 59  | 1. 28E-39 |
| PRR4 | C1orf195    | 0. 588 | 2. 50E-39 |
| PRR4 | AC025918. 1 | 0. 582 | 2. 60E-38 |
| PRR4 | AF107885. 2 | 0. 627 | 5. 08E-46 |

|      |             |        |           |
|------|-------------|--------|-----------|
| PRR4 | AC079336. 4 | 0. 542 | 1. 36E-32 |
| PRR4 | AC005522. 2 | 0. 626 | 9. 01E-46 |
| PRR4 | LINC01813   | 0. 509 | 2. 67E-28 |
| PRR4 | AL162385. 2 | 0. 579 | 7. 01E-38 |
| PRR4 | CACNA1C-IT3 | 0. 612 | 3. 09E-43 |
| PRR4 | AL133480. 1 | 0. 61  | 5. 73E-43 |
| PRR4 | RAI1-AS1    | 0. 553 | 4. 01E-34 |
| PRR4 | AC104791. 1 | 0. 557 | 1. 44E-34 |
| PRR4 | AC127164. 1 | 0. 588 | 2. 60E-39 |
| PRR4 | AC007529. 1 | 0. 519 | 1. 85E-29 |
| PRR4 | AL021368. 3 | 0. 545 | 6. 18E-33 |
| PRR4 | AC007878. 1 | 0. 655 | 2. 17E-51 |
| PRR4 | LAMTOR5-AS1 | 0. 53  | 5. 63E-31 |
| PRR4 | AC017002. 1 | 0. 514 | 7. 09E-29 |
| PRR4 | AC103810. 5 | 0. 58  | 5. 30E-38 |
| PRR4 | AP001020. 2 | 0. 584 | 1. 00E-38 |
| PRR4 | LINC02157   | 0. 515 | 5. 88E-29 |
| PRR4 | AL031710. 1 | 0. 537 | 8. 33E-32 |
| PRR4 | AC007003. 1 | 0. 539 | 4. 09E-32 |
| PRR4 | LARGE-AS1   | 0. 616 | 5. 07E-44 |
| PRR4 | AC134349. 1 | 0. 637 | 9. 16E-48 |
| PRR4 | U51244. 1   | 0. 581 | 3. 81E-38 |
| PRR4 | AC092120. 2 | 0. 57  | 1. 64E-36 |
| PRR4 | ATG10-IT1   | 0. 551 | 9. 08E-34 |
| PRR4 | CDC42-IT1   | 0. 663 | 4. 74E-53 |
| PRR4 | AC011120. 1 | 0. 625 | 1. 19E-45 |
| PRR4 | AL132656. 3 | 0. 568 | 3. 56E-36 |
| PRR4 | Z94721. 2   | 0. 641 | 1. 17E-48 |
| PRR4 | AP001267. 4 | 0. 518 | 2. 35E-29 |
| PRR4 | AC096708. 3 | 0. 628 | 3. 76E-46 |
| PRR4 | AC084824. 3 | 0. 611 | 3. 52E-43 |
| PRR4 | AC009563. 1 | 0. 61  | 5. 00E-43 |
| PRR4 | AL353801. 1 | 0. 535 | 1. 23E-31 |
| PRR4 | AC008056. 1 | 0. 51  | 2. 41E-28 |
| PRR4 | AC011389. 1 | 0. 588 | 2. 62E-39 |
| PRR4 | AC026894. 1 | 0. 567 | 5. 00E-36 |
| PRR4 | AC005034. 2 | 0. 505 | 8. 12E-28 |
| PRR4 | AC073591. 1 | 0. 548 | 2. 29E-33 |
| PRR4 | AP002439. 1 | 0. 505 | 8. 58E-28 |
| PRR4 | AL034550. 1 | 0. 507 | 5. 15E-28 |
| PRR4 | AC027796. 1 | 0. 549 | 1. 59E-33 |
| PRR4 | AL391863. 2 | 0. 612 | 3. 22E-43 |
| PRR4 | MACROD2-AS1 | 0. 558 | 1. 04E-34 |
| PRR4 | ZBTB20-AS1  | 0. 535 | 1. 31E-31 |



|      |             |        |           |
|------|-------------|--------|-----------|
| PRR4 | AC006441. 1 | 0. 587 | 4. 24E-39 |
| PRR4 | AC110921. 1 | 0. 595 | 1. 92E-40 |
| PRR4 | BIRC6-AS2   | 0. 625 | 1. 40E-45 |
| PRR4 | AL355297. 2 | 0. 539 | 4. 13E-32 |
| PRR4 | AC093752. 2 | 0. 571 | 1. 21E-36 |
| PRR4 | AC244093. 5 | 0. 596 | 1. 30E-40 |
| PRR4 | AC134775. 1 | 0. 576 | 1. 78E-37 |
| PRR4 | ZNF346-IT1  | 0. 528 | 1. 03E-30 |
| PRR4 | AC069029. 1 | 0. 504 | 1. 02E-27 |
| PRR4 | AC027544. 2 | 0. 572 | 8. 22E-37 |
| PRR4 | AC010530. 1 | 0. 573 | 6. 20E-37 |
| PRR4 | EPN2-AS1    | 0. 576 | 2. 31E-37 |
| PRR4 | AC073476. 3 | 0. 555 | 2. 88E-34 |
| PRR4 | EIF1AX-AS1  | 0. 624 | 2. 32E-45 |
| PRR4 | AC046158. 2 | 0. 618 | 2. 50E-44 |
| PRR4 | AC092140. 1 | 0. 501 | 2. 34E-27 |
| PRR4 | AL359094. 1 | 0. 627 | 6. 97E-46 |
| PRR4 | AC007161. 1 | 0. 586 | 5. 21E-39 |
| PRR4 | AC010834. 3 | 0. 537 | 8. 30E-32 |
| PRR4 | AC005899. 8 | 0. 579 | 6. 18E-38 |
| PRR4 | LINC02399   | 0. 526 | 1. 83E-30 |
| PRR4 | AL158207. 2 | 0. 555 | 2. 57E-34 |
| PRR4 | AC010978. 1 | 0. 615 | 7. 90E-44 |
| PRR4 | AL136115. 1 | 0. 607 | 1. 72E-42 |
| PRR4 | AC093690. 1 | 0. 629 | 3. 03E-46 |
| PRR4 | AL158801. 3 | 0. 63  | 1. 57E-46 |
| PRR4 | AC009063. 2 | 0. 509 | 3. 08E-28 |
| PRR4 | AL159174. 1 | 0. 531 | 4. 73E-31 |
| PRR4 | MPRIP-AS1   | 0. 568 | 2. 81E-36 |
| PRR4 | AC006387. 1 | 0. 574 | 4. 57E-37 |
| PRR4 | AC079209. 2 | 0. 599 | 3. 63E-41 |
| PRR4 | AC008937. 3 | 0. 552 | 6. 32E-34 |
| PRR4 | AC090589. 2 | 0. 524 | 4. 13E-30 |
| PRR4 | AL445248. 1 | 0. 535 | 1. 47E-31 |
| PRR4 | AL353771. 1 | 0. 598 | 6. 86E-41 |
| PRR4 | AL136379. 1 | 0. 644 | 2. 91E-49 |
| PRR4 | AP000919. 3 | 0. 581 | 2. 89E-38 |
| PRR4 | AL445489. 1 | 0. 601 | 2. 24E-41 |

---
