# Supplementary material for: Development of a Ferroptosis-Related lncRNA Signature to Predict the Prognosis and Immune Landscape of Bladder Cancer
Source: Hindawi journal article supplement (doi:10.1155/2021/1031906), 2021-06-20
Supplement: f1 [file 1031906.f1.zip]

Supplementary Table S3. Kaplan-Meier survival analysis of the lncRNA pairs.

| lncRNA_pair            | pvalue      |
|------------------------|-------------|
| AC025259.3_AC079313.2  | 0.74484172  |
| AC025259.3_AC135012.3  | 0.576596349 |
| AC025259.3_AC036108.3  | 0.954511176 |
| AC025259.3_AC012085.2  | 0.191742987 |
| AC025259.3_MAGI2-AS3   | 0.816973847 |
| AC025259.3_CARMN       | 0.313173056 |
| AC025259.3_AL445423.1  | 0.258627355 |
| AC025259.3_AC134312.5  | 0.81997528  |
| AC025259.3_AC090825.1  | 0.642554094 |
| AC025259.3_ADAMTS9-AS1 | 0.423194447 |
| AC025259.3_MEF2C-AS1   | 0.437036527 |
| AC025259.3_LINC01778   | 0.217472726 |
| AC025259.3_AF001548.1  | 0.46016261  |
| AC025259.3_AC002398.2  | 0.274990445 |
| AC025259.3_AL662860.1  | 0.760272528 |
| AC025259.3_AC079313.1  | 0.640105571 |
| AC025259.3_AC131097.4  | 0.210678556 |
| AC025259.3_AC092376.2  | 0.341045394 |
| AC025259.3_AC053503.4  | 0.428232515 |
| AC025259.3_AC027449.1  | 0.723790906 |
| AC025259.3_AP001189.1  | 0.889974049 |
| AC025259.3_AC005180.1  | 0.866653442 |
| AC025259.3_FENDRR      | 0.191875996 |
| AC025259.3_LINC02202   | 0.709967533 |
| AC025259.3_AP003071.4  | 0.647495883 |
| AC025259.3_AL365214.2  | 0.682376637 |
| AC025259.3_ADAMTS9-AS2 | 0.593074388 |
| AC025259.3_AP001107.5  | 0.77645967  |
| AC025259.3_AC087521.1  | 0.174700132 |
| AC025259.3_AC007671.1  | 0.262524086 |
| AC025259.3_LINC01081   | 0.842720455 |
| AC025259.3_HAND2-AS1   | 0.611269327 |
| AC025259.3_AC005180.2  | 0.515090968 |
| AC025259.3_LINC00702   | 0.331496414 |
| AC025259.3_MBNL1-AS1   | 0.642523462 |
| AC025259.3_LINC01614   | 0.197095881 |
| AC025259.3_MIR100HG    | 0.176140014 |
| AC025259.3_JAZF1-AS1   | 0.798048088 |
| AC025259.3_AC022893.1  | 0.589618307 |
| AC025259.3_ACTA2-AS1   | 0.865083787 |
| AC025259.3_AP003071.3  | 0.963095283 |

---

|                       |             |
|-----------------------|-------------|
| AC025259.3_LINC01352  | 0.754878067 |
| AC025259.3_AC134312.1 | 0.423013826 |
| AC025259.3_AC091588.3 | 0.933707462 |
| AC025259.3_HLX-AS1    | 0.154761093 |
| AC025259.3_LINC00402  | 0.361730561 |
| AC025259.3_LINC01781  | 0.703629198 |
| AC025259.3_AC007128.1 | 0.709466597 |
| AC025259.3_AC099850.3 | 0.453422575 |
| AC025259.3_AC010655.2 | 0.458659055 |
| AC025259.3_LINC00941  | 0.86438278  |
| AC025259.3_MYOSLID    | 0.958756902 |
| AC025259.3_AL161772.1 | 0.835372727 |
| AC025259.3_AP005432.2 | 0.17097029  |
| AC025259.3_AC099066.2 | 0.858582981 |
| AC025259.3_CDKN2B-AS1 | 0.369395081 |
| AC025259.3_AL449423.1 | 0.470202132 |
| AC025259.3_AL445490.1 | 0.650452297 |
| AC025259.3_U62317.2   | 0.013057568 |
| AC025259.3_AC004988.1 | 0.028643947 |
| AC025259.3_LINC02195  | 0.012514199 |
| AC025259.3_AC090125.1 | 0.319797226 |
| AC025259.3_LINC01048  | 0.175109392 |
| AC025259.3_AC090673.1 | 0.92385728  |
| AC025259.3_AL356417.2 | 0.441380766 |
| AC025259.3_AC007750.1 | 0.374462749 |
| AC025259.3_LINC01561  | 0.702057643 |
| AC025259.3_LINC01833  | 0.28778544  |
| AC025259.3_LINC00460  | 0.912979211 |
| AC025259.3_LINC00536  | 0.142165032 |
| AC025259.3_AP000553.1 | 0.437608136 |
| AC025259.3_AATBC      | 0.008679564 |
| AC025259.3_AL161431.1 | 0.162999734 |
| AC025259.3_PICSAR     | 0.84793586  |
| AC025259.3_LINC01615  | 0.50910978  |
| AC025259.3_LINC00641  | 0.603143915 |
| AC025259.3_MIR133A1HG | 0.451885041 |
| AC025259.3_AC104984.6 | 0.615771239 |
| AC025259.3_AL023755.1 | 0.436238586 |
| AC025259.3_AL359851.1 | 0.164226041 |
| AC025259.3_AC015923.1 | 0.218730459 |
| AC025259.3_AC005828.1 | 0.272924174 |
| AC025259.3_AC023034.1 | 0.247509479 |
| AC025259.3_AC099811.5 | 0.829350956 |
| AC025259.3_FP325330.3 | 0.822861601 |

---

---

|                        |             |
|------------------------|-------------|
| AC025259.3_AL355075.4  | 0.814551516 |
| AC025259.3_RMRP        | 0.593230643 |
| AC025259.3_AC037487.2  | 0.531218345 |
| AC025259.3_AC006141.1  | 0.164306928 |
| AC025259.3_LINC02443   | 0.113648425 |
| AC025259.3_MIR181A1HG  | 0.758451339 |
| AC025259.3_LINC02465   | 0.369605915 |
| AC025259.3_AC091906.1  | 0.852268663 |
| AC079313.2_AC135012.3  | 0.609952372 |
| AC079313.2_AC036108.3  | 0.132220263 |
| AC079313.2_AC012085.2  | 0.865748285 |
| AC079313.2_MAGI2-AS3   | 0.258303167 |
| AC079313.2_CARMN       | 0.418951491 |
| AC079313.2_AL445423.1  | 0.873699915 |
| AC079313.2_AC134312.5  | 0.830079297 |
| AC079313.2_AC090825.1  | 0.245957762 |
| AC079313.2_ADAMTS9-AS1 | 0.937500094 |
| AC079313.2_MEF2C-AS1   | 0.825060731 |
| AC079313.2_LINC01778   | 0.890479377 |
| AC079313.2_AF001548.1  | 0.402374954 |
| AC079313.2_AC002398.2  | 0.950234375 |
| AC079313.2_AL662860.1  | 0.112770293 |
| AC079313.2_AC079313.1  | 0.384730401 |
| AC079313.2_AC131097.4  | 0.142671535 |
| AC079313.2_AC092376.2  | 0.774375101 |
| AC079313.2_AC053503.4  | 0.130395224 |
| AC079313.2_AC027449.1  | 0.613318705 |
| AC079313.2_AP001189.1  | 0.444529485 |
| AC079313.2_AC005180.1  | 0.995595664 |
| AC079313.2_FENDRR      | 0.845346298 |
| AC079313.2_LINC02202   | 0.0581344   |
| AC079313.2_AP003071.4  | 0.832121256 |
| AC079313.2_AL365214.2  | 0.086950908 |
| AC079313.2_ADAMTS9-AS2 | 0.991949439 |
| AC079313.2_AP001107.5  | 0.827307812 |
| AC079313.2_AC087521.1  | 0.340595814 |
| AC079313.2_AC007671.1  | 0.851900557 |
| AC079313.2_LINC01081   | 0.706684225 |
| AC079313.2_HAND2-AS1   | 0.506932171 |
| AC079313.2_AC005180.2  | 0.849506524 |
| AC079313.2_LINC00702   | 0.880770791 |
| AC079313.2_MBNL1-AS1   | 0.419510648 |
| AC079313.2_LINC01614   | 0.175115965 |
| AC079313.2_MIR100HG    | 0.925904653 |

---

---

|                       |             |
|-----------------------|-------------|
| AC079313.2_JAZF1-AS1  | 0.831319582 |
| AC079313.2_AC022893.1 | 0.278945117 |
| AC079313.2_ACTA2-AS1  | 0.708076617 |
| AC079313.2_AP003071.3 | 0.969749782 |
| AC079313.2_LINC01352  | 0.590851029 |
| AC079313.2_AC134312.1 | 0.809202929 |
| AC079313.2_AC091588.3 | 0.753313877 |
| AC079313.2_HLX-AS1    | 0.770150564 |
| AC079313.2_LINC00402  | 0.960693966 |
| AC079313.2_LINC01781  | 0.558589985 |
| AC079313.2_AC007128.1 | 0.27373507  |
| AC079313.2_AC099850.3 | 0.833380994 |
| AC079313.2_AC010655.2 | 0.120982237 |
| AC079313.2_LINC00941  | 0.59879892  |
| AC079313.2_MYOSLID    | 0.618239613 |
| AC079313.2_AL161772.1 | 0.15600072  |
| AC079313.2_AP005432.2 | 0.350628819 |
| AC079313.2_AC099066.2 | 0.34943237  |
| AC079313.2_CDKN2B-AS1 | 0.3026834   |
| AC079313.2_AL449423.1 | 0.477986338 |
| AC079313.2_AL445490.1 | 0.685438644 |
| AC079313.2_U62317.2   | 0.983918388 |
| AC079313.2_AC004988.1 | 0.265760932 |
| AC079313.2_LINC02195  | 0.024849276 |
| AC079313.2_AC090125.1 | 0.846303912 |
| AC079313.2_LINC01048  | 0.74692023  |
| AC079313.2_AC090673.1 | 0.958220365 |
| AC079313.2_AL356417.2 | 0.944726724 |
| AC079313.2_AC007750.1 | 0.690179999 |
| AC079313.2_LINC01561  | 0.981897815 |
| AC079313.2_LINC01833  | 0.013206181 |
| AC079313.2_LINC00460  | 0.783732051 |
| AC079313.2_LINC00536  | 0.463466872 |
| AC079313.2_AP000553.1 | 0.619450809 |
| AC079313.2_AATBC      | 0.396020334 |
| AC079313.2_AL161431.1 | 0.364320905 |
| AC079313.2_PICSA      | 0.026216817 |
| AC079313.2_LINC01615  | 0.448320715 |
| AC079313.2_LINC00641  | 0.200182911 |
| AC079313.2_MIR133A1HG | 0.52423708  |
| AC079313.2_AC104984.6 | 0.277431504 |
| AC079313.2_AL023755.1 | 0.116553653 |
| AC079313.2_AL359851.1 | 0.642623959 |
| AC079313.2_AC015923.1 | 0.434761321 |

---

---

|                        |             |
|------------------------|-------------|
| AC079313.2_AC005828.1  | 0.651610864 |
| AC079313.2_AC023034.1  | 0.091896048 |
| AC079313.2_AC099811.5  | 0.519155133 |
| AC079313.2_FP325330.3  | 0.186477504 |
| AC079313.2_AL355075.4  | 0.651498199 |
| AC079313.2_RMRP        | 0.880789632 |
| AC079313.2_AC037487.2  | 0.657804465 |
| AC079313.2_AC006141.1  | 0.640546637 |
| AC079313.2_LINC02443   | 0.268304021 |
| AC079313.2_MIR181A1HG  | 0.621274957 |
| AC079313.2_LINC02465   | 0.315683895 |
| AC079313.2_AC091906.1  | 0.446518937 |
| AC135012.3_AC036108.3  | 0.715432325 |
| AC135012.3_AC012085.2  | 0.350860101 |
| AC135012.3_MAGI2-AS3   | 0.407874937 |
| AC135012.3_CARMN       | 0.566511474 |
| AC135012.3_AL445423.1  | 0.639116586 |
| AC135012.3_AC134312.5  | 0.360391478 |
| AC135012.3_AC090825.1  | 0.919804442 |
| AC135012.3_ADAMTS9-AS1 | 0.132218553 |
| AC135012.3_MEF2C-AS1   | 0.461483482 |
| AC135012.3_LINC01778   | 0.103798911 |
| AC135012.3_AF001548.1  | 0.589547935 |
| AC135012.3_AC002398.2  | 0.255415665 |
| AC135012.3_AL662860.1  | 0.919627565 |
| AC135012.3_AC079313.1  | 0.844651035 |
| AC135012.3_AC131097.4  | 0.940180258 |
| AC135012.3_AC092376.2  | 0.848620718 |
| AC135012.3_AC053503.4  | 0.031051843 |
| AC135012.3_AC027449.1  | 0.507511369 |
| AC135012.3_AP001189.1  | 0.57357408  |
| AC135012.3_AC005180.1  | 0.076354248 |
| AC135012.3_FENDRR      | 0.09243187  |
| AC135012.3_LINC02202   | 0.162097501 |
| AC135012.3_AP003071.4  | 0.003473122 |
| AC135012.3_AL365214.2  | 0.894777444 |
| AC135012.3_ADAMTS9-AS2 | 0.906734935 |
| AC135012.3_AP001107.5  | 0.233417159 |
| AC135012.3_AC087521.1  | 0.884998864 |
| AC135012.3_AC007671.1  | 0.903739494 |
| AC135012.3_LINC01081   | 0.961695004 |
| AC135012.3_HAND2-AS1   | 0.527608125 |
| AC135012.3_AC005180.2  | 0.886571057 |
| AC135012.3_LINC00702   | 0.585451409 |

---

---

|                       |             |
|-----------------------|-------------|
| AC135012.3_MBNL1-AS1  | 0.859486007 |
| AC135012.3_LINC01614  | 0.095955582 |
| AC135012.3_MIR100HG   | 0.678188409 |
| AC135012.3_JAZF1-AS1  | 0.639127535 |
| AC135012.3_AC022893.1 | 0.62130207  |
| AC135012.3_ACTA2-AS1  | 0.46653338  |
| AC135012.3_AP003071.3 | 0.954601106 |
| AC135012.3_LINC01352  | 0.601700425 |
| AC135012.3_AC134312.1 | 0.870749375 |
| AC135012.3_AC091588.3 | 0.890091447 |
| AC135012.3_HLX-AS1    | 0.158651078 |
| AC135012.3_LINC00402  | 0.374125348 |
| AC135012.3_LINC01781  | 0.654703801 |
| AC135012.3_AC007128.1 | 0.137188492 |
| AC135012.3_AC099850.3 | 0.354835519 |
| AC135012.3_AC010655.2 | 0.643315294 |
| AC135012.3_LINC00941  | 0.935211049 |
| AC135012.3_MYOSLID    | 0.152741481 |
| AC135012.3_AL161772.1 | 0.359451615 |
| AC135012.3_AP005432.2 | 0.169591923 |
| AC135012.3_AC099066.2 | 0.800986547 |
| AC135012.3_CDKN2B-AS1 | 0.141876518 |
| AC135012.3_AL449423.1 | 0.468007917 |
| AC135012.3_AL445490.1 | 0.357936712 |
| AC135012.3_AC004988.1 | 0.790570662 |
| AC135012.3_LINC02195  | 0.40228594  |
| AC135012.3_AC090125.1 | 0.857242632 |
| AC135012.3_LINC01048  | 0.903182645 |
| AC135012.3_AC090673.1 | 0.155631221 |
| AC135012.3_AL356417.2 | 0.080640598 |
| AC135012.3_AC007750.1 | 0.636965027 |
| AC135012.3_LINC01561  | 0.243247596 |
| AC135012.3_LINC01833  | 0.814657844 |
| AC135012.3_LINC00460  | 0.923377418 |
| AC135012.3_LINC00536  | 0.249446013 |
| AC135012.3_AP000553.1 | 0.513073602 |
| AC135012.3_AATBC      | 0.865508297 |
| AC135012.3_AL161431.1 | 0.014120778 |
| AC135012.3_PICSAR     | 0.375914395 |
| AC135012.3_LINC01615  | 0.290336232 |
| AC135012.3_LINC00641  | 0.174131458 |
| AC135012.3_MIR133A1HG | 0.319156685 |
| AC135012.3_AC104984.6 | 0.339467079 |
| AC135012.3_AL023755.1 | 0.41673466  |

---

---

|                        |             |
|------------------------|-------------|
| AC135012.3_AL359851.1  | 0.868156122 |
| AC135012.3_AC015923.1  | 0.266564038 |
| AC135012.3_AC005828.1  | 0.408125681 |
| AC135012.3_AC023034.1  | 0.768974017 |
| AC135012.3_AC099811.5  | 0.417272922 |
| AC135012.3_FP325330.3  | 0.6211301   |
| AC135012.3_AL355075.4  | 0.252896482 |
| AC135012.3_RMRP        | 0.983919989 |
| AC135012.3_AC037487.2  | 0.724451097 |
| AC135012.3_AC006141.1  | 0.745732368 |
| AC135012.3_LINC02443   | 0.146776455 |
| AC135012.3_MIR181A1HG  | 0.143559333 |
| AC135012.3_LINC02465   | 0.245926764 |
| AC135012.3_AC091906.1  | 0.318723075 |
| AC036108.3_AC012085.2  | 0.724047773 |
| AC036108.3_MAGI2-AS3   | 0.329660545 |
| AC036108.3_CARMN       | 0.439080547 |
| AC036108.3_AL445423.1  | 0.782288832 |
| AC036108.3_AC134312.5  | 0.415917374 |
| AC036108.3_AC090825.1  | 0.707220439 |
| AC036108.3_ADAMTS9-AS1 | 0.440913738 |
| AC036108.3_MEF2C-AS1   | 0.502630435 |
| AC036108.3_LINC01778   | 0.868053812 |
| AC036108.3_AF001548.1  | 0.087377543 |
| AC036108.3_AC002398.2  | 0.404570752 |
| AC036108.3_AL662860.1  | 0.692164123 |
| AC036108.3_AC079313.1  | 0.060252648 |
| AC036108.3_AC131097.4  | 0.17625431  |
| AC036108.3_AC092376.2  | 0.927724072 |
| AC036108.3_AC053503.4  | 0.064175621 |
| AC036108.3_AC027449.1  | 0.995533717 |
| AC036108.3_AP001189.1  | 0.195199182 |
| AC036108.3_AC005180.1  | 0.021978232 |
| AC036108.3_FENDRR      | 0.406620606 |
| AC036108.3_LINC02202   | 0.690208791 |
| AC036108.3_AP003071.4  | 0.299676421 |
| AC036108.3_AL365214.2  | 0.308081961 |
| AC036108.3_ADAMTS9-AS2 | 0.160301881 |
| AC036108.3_AP001107.5  | 0.087906779 |
| AC036108.3_AC087521.1  | 0.758672715 |
| AC036108.3_AC007671.1  | 0.108773993 |
| AC036108.3_LINC01081   | 0.580384009 |
| AC036108.3_HAND2-AS1   | 0.248103335 |
| AC036108.3_AC005180.2  | 0.95964053  |

---

---

|                       |             |
|-----------------------|-------------|
| AC036108.3_LINC00702  | 0.068199045 |
| AC036108.3_MBNL1-AS1  | 0.808821259 |
| AC036108.3_LINC01614  | 0.147904344 |
| AC036108.3_MIR100HG   | 0.165516922 |
| AC036108.3_JAZF1-AS1  | 0.479928606 |
| AC036108.3_AC022893.1 | 0.290747129 |
| AC036108.3_ACTA2-AS1  | 0.838631313 |
| AC036108.3_AP003071.3 | 0.478916322 |
| AC036108.3_LINC01352  | 0.789312055 |
| AC036108.3_AC134312.1 | 0.060883022 |
| AC036108.3_AC091588.3 | 0.866624918 |
| AC036108.3_HLX-AS1    | 0.07470095  |
| AC036108.3_LINC00402  | 0.674533436 |
| AC036108.3_LINC01781  | 0.260938418 |
| AC036108.3_AC007128.1 | 0.318880952 |
| AC036108.3_AC099850.3 | 0.787775639 |
| AC036108.3_AC010655.2 | 0.233455482 |
| AC036108.3_LINC00941  | 0.85279006  |
| AC036108.3_MYOSLID    | 0.679306826 |
| AC036108.3_AL161772.1 | 0.441743438 |
| AC036108.3_AP005432.2 | 0.005314681 |
| AC036108.3_AC099066.2 | 0.176515416 |
| AC036108.3_CDKN2B-AS1 | 0.781340766 |
| AC036108.3_AL449423.1 | 0.371349351 |
| AC036108.3_AL445490.1 | 0.585145716 |
| AC036108.3_U62317.2   | 0.243805677 |
| AC036108.3_AC004988.1 | 0.070170929 |
| AC036108.3_LINC02195  | 0.072811728 |
| AC036108.3_AC090125.1 | 0.678393397 |
| AC036108.3_LINC01048  | 0.984436998 |
| AC036108.3_AC090673.1 | 0.348641461 |
| AC036108.3_AL356417.2 | 0.994815917 |
| AC036108.3_AC007750.1 | 0.996537917 |
| AC036108.3_LINC01561  | 0.921203657 |
| AC036108.3_LINC01833  | 0.163540598 |
| AC036108.3_LINC00460  | 0.96636369  |
| AC036108.3_LINC00536  | 0.01144786  |
| AC036108.3_AP000553.1 | 0.834912477 |
| AC036108.3_AATBC      | 0.237907703 |
| AC036108.3_AL161431.1 | 0.004494628 |
| AC036108.3_PICSAR     | 0.221844657 |
| AC036108.3_LINC01615  | 0.260323213 |
| AC036108.3_LINC00641  | 0.076853334 |
| AC036108.3_MIR133A1HG | 0.941349593 |

---



---

|                        |             |
|------------------------|-------------|
| AC036108.3_AC104984.6  | 0.484995526 |
| AC036108.3_AL023755.1  | 0.213866488 |
| AC036108.3_AL359851.1  | 0.862647971 |
| AC036108.3_AC015923.1  | 0.256980987 |
| AC036108.3_AC005828.1  | 0.441528909 |
| AC036108.3_AC023034.1  | 0.352918205 |
| AC036108.3_AC099811.5  | 0.256613985 |
| AC036108.3_FP325330.3  | 0.275849708 |
| AC036108.3_AL355075.4  | 0.699289055 |
| AC036108.3_RMRP        | 0.111952669 |
| AC036108.3_AC037487.2  | 0.42618844  |
| AC036108.3_AC006141.1  | 0.528274881 |
| AC036108.3_LINC02443   | 0.366979662 |
| AC036108.3_MIR181A1HG  | 0.16395421  |
| AC036108.3_LINC02465   | 0.356986142 |
| AC036108.3_AC091906.1  | 0.40848861  |
| AC012085.2_MAGI2-AS3   | 0.349189152 |
| AC012085.2_CARMN       | 0.786526168 |
| AC012085.2_AL445423.1  | 0.541469957 |
| AC012085.2_AC134312.5  | 0.143740109 |
| AC012085.2_AC090825.1  | 0.93349742  |
| AC012085.2_ADAMTS9-AS1 | 0.31501346  |
| AC012085.2_MEF2C-AS1   | 0.981764863 |
| AC012085.2_LINC01778   | 0.293589597 |
| AC012085.2_AF001548.1  | 0.127494712 |
| AC012085.2_AC002398.2  | 0.331489684 |
| AC012085.2_AL662860.1  | 0.73900549  |
| AC012085.2_AC079313.1  | 0.937123976 |
| AC012085.2_AC131097.4  | 0.760267261 |
| AC012085.2_AC092376.2  | 0.618987889 |
| AC012085.2_AC053503.4  | 0.078038292 |
| AC012085.2_AC027449.1  | 0.639252153 |
| AC012085.2_AP001189.1  | 0.297928398 |
| AC012085.2_AC005180.1  | 0.395918563 |
| AC012085.2_FENDRR      | 0.040623748 |
| AC012085.2_LINC02202   | 0.479097761 |
| AC012085.2_AP003071.4  | 0.310260481 |
| AC012085.2_AL365214.2  | 0.055608269 |
| AC012085.2_ADAMTS9-AS2 | 0.223929905 |
| AC012085.2_AP001107.5  | 0.640315719 |
| AC012085.2_AC087521.1  | 0.212440299 |
| AC012085.2_AC007671.1  | 0.963208613 |
| AC012085.2_LINC01081   | 0.642044638 |
| AC012085.2_HAND2-AS1   | 0.993390973 |

---

---

|                       |             |
|-----------------------|-------------|
| AC012085.2_AC005180.2 | 0.912060512 |
| AC012085.2_LINC00702  | 0.309957892 |
| AC012085.2_MBNL1-AS1  | 0.167762852 |
| AC012085.2_LINC01614  | 0.419982696 |
| AC012085.2_MIR100HG   | 0.602078727 |
| AC012085.2_JAZF1-AS1  | 0.733605664 |
| AC012085.2_AC022893.1 | 0.521827149 |
| AC012085.2_ACTA2-AS1  | 0.442263634 |
| AC012085.2_AP003071.3 | 0.46073412  |
| AC012085.2_LINC01352  | 0.530090457 |
| AC012085.2_AC134312.1 | 0.536041599 |
| AC012085.2_AC091588.3 | 0.517081196 |
| AC012085.2_HLX-AS1    | 0.119505436 |
| AC012085.2_LINC00402  | 0.698729083 |
| AC012085.2_LINC01781  | 0.37619107  |
| AC012085.2_AC007128.1 | 0.721834953 |
| AC012085.2_AC099850.3 | 0.822813831 |
| AC012085.2_AC010655.2 | 0.842398165 |
| AC012085.2_LINC00941  | 0.798872188 |
| AC012085.2_MYOSLID    | 0.436266419 |
| AC012085.2_AL161772.1 | 0.78065419  |
| AC012085.2_AP005432.2 | 0.232179275 |
| AC012085.2_AC099066.2 | 0.809747675 |
| AC012085.2_CDKN2B-AS1 | 0.477064061 |
| AC012085.2_AL449423.1 | 0.598737071 |
| AC012085.2_AL445490.1 | 0.952210708 |
| AC012085.2_U62317.2   | 0.369798153 |
| AC012085.2_AC004988.1 | 0.687831387 |
| AC012085.2_LINC02195  | 0.700912916 |
| AC012085.2_AC090125.1 | 0.637487408 |
| AC012085.2_LINC01048  | 0.469640507 |
| AC012085.2_AC090673.1 | 0.109780225 |
| AC012085.2_AL356417.2 | 0.07762097  |
| AC012085.2_AC007750.1 | 0.785185712 |
| AC012085.2_LINC01561  | 0.366919155 |
| AC012085.2_LINC01833  | 0.102087501 |
| AC012085.2_LINC00460  | 0.718708202 |
| AC012085.2_LINC00536  | 0.026016075 |
| AC012085.2_AP000553.1 | 0.783986287 |
| AC012085.2_AATBC      | 0.959960253 |
| AC012085.2_AL161431.1 | 0.039007737 |
| AC012085.2_PICSAR     | 0.144472202 |
| AC012085.2_LINC01615  | 0.328547168 |
| AC012085.2_LINC00641  | 0.588864523 |

---

---

|                       |             |
|-----------------------|-------------|
| AC012085.2_MIR133A1HG | 0.469993206 |
| AC012085.2_AC104984.6 | 0.316430938 |
| AC012085.2_AL023755.1 | 0.238798622 |
| AC012085.2_AL359851.1 | 0.231135395 |
| AC012085.2_AC015923.1 | 0.051276278 |
| AC012085.2_AC005828.1 | 0.376696157 |
| AC012085.2_AC023034.1 | 0.989098265 |
| AC012085.2_AC099811.5 | 0.958395496 |
| AC012085.2_FP325330.3 | 0.127435413 |
| AC012085.2_AL355075.4 | 0.155255778 |
| AC012085.2_RMRP       | 0.880824756 |
| AC012085.2_AC037487.2 | 0.400030237 |
| AC012085.2_AC006141.1 | 0.04427653  |
| AC012085.2_LINC02443  | 0.113033798 |
| AC012085.2_MIR181A1HG | 0.756206675 |
| AC012085.2_LINC02465  | 0.62985379  |
| AC012085.2_AC091906.1 | 0.15408027  |
| MAGI2-AS3_CARMN       | 0.898521232 |
| MAGI2-AS3_AL445423.1  | 0.620250035 |
| MAGI2-AS3_AC134312.5  | 0.755231587 |
| MAGI2-AS3_AC090825.1  | 0.00106639  |
| MAGI2-AS3_ADAMTS9-AS1 | 0.137510305 |
| MAGI2-AS3_MEF2C-AS1   | 0.528936567 |
| MAGI2-AS3_LINC01778   | 0.427778885 |
| MAGI2-AS3_AF001548.1  | 0.728337992 |
| MAGI2-AS3_AC002398.2  | 0.547745624 |
| MAGI2-AS3_AL662860.1  | 0.357946483 |
| MAGI2-AS3_AC079313.1  | 0.671523732 |
| MAGI2-AS3_AC131097.4  | 0.247650946 |
| MAGI2-AS3_AC092376.2  | 0.619759077 |
| MAGI2-AS3_AC053503.4  | 0.221663615 |
| MAGI2-AS3_AC027449.1  | 0.83876656  |
| MAGI2-AS3_AP001189.1  | 0.244994496 |
| MAGI2-AS3_AC005180.1  | 0.04096028  |
| MAGI2-AS3_FENDRR      | 0.336003036 |
| MAGI2-AS3_LINC02202   | 0.6590159   |
| MAGI2-AS3_AP003071.4  | 0.732807591 |
| MAGI2-AS3_AL365214.2  | 0.772991706 |
| MAGI2-AS3_AP001107.5  | 0.275009988 |
| MAGI2-AS3_AC087521.1  | 0.043380715 |
| MAGI2-AS3_AC007671.1  | 0.84535188  |
| MAGI2-AS3_LINC01081   | 0.018714888 |
| MAGI2-AS3_HAND2-AS1   | 0.879918478 |
| MAGI2-AS3_AC005180.2  | 0.149712496 |

---

---

|                      |             |
|----------------------|-------------|
| MAGI2-AS3_LINC00702  | 0.096187727 |
| MAGI2-AS3_MBNL1-AS1  | 0.43616155  |
| MAGI2-AS3_LINC01614  | 0.097829673 |
| MAGI2-AS3_MIR100HG   | 0.015084977 |
| MAGI2-AS3_AC022893.1 | 0.97533661  |
| MAGI2-AS3_ACTA2-AS1  | 0.392354297 |
| MAGI2-AS3_AP003071.3 | 0.899150622 |
| MAGI2-AS3_LINC01352  | 0.533913447 |
| MAGI2-AS3_AC091588.3 | 0.542356725 |
| MAGI2-AS3_HLX-AS1    | 0.667761863 |
| MAGI2-AS3_LINC00402  | 0.040870121 |
| MAGI2-AS3_LINC01781  | 0.854122355 |
| MAGI2-AS3_AC007128.1 | 0.313559697 |
| MAGI2-AS3_AC099850.3 | 0.957537716 |
| MAGI2-AS3_AC010655.2 | 0.292210284 |
| MAGI2-AS3_LINC00941  | 0.410121607 |
| MAGI2-AS3_MYOSLID    | 0.440000376 |
| MAGI2-AS3_AL161772.1 | 0.472515301 |
| MAGI2-AS3_AP005432.2 | 0.614079483 |
| MAGI2-AS3_AC099066.2 | 0.694710467 |
| MAGI2-AS3_CDKN2B-AS1 | 0.393489    |
| MAGI2-AS3_AL449423.1 | 0.874341804 |
| MAGI2-AS3_AL445490.1 | 0.132975975 |
| MAGI2-AS3_U62317.2   | 0.636228414 |
| MAGI2-AS3_AC004988.1 | 0.347520998 |
| MAGI2-AS3_LINC02195  | 0.006013702 |
| MAGI2-AS3_AC090125.1 | 0.790880414 |
| MAGI2-AS3_LINC01048  | 0.956412037 |
| MAGI2-AS3_AC090673.1 | 0.892252415 |
| MAGI2-AS3_AL356417.2 | 0.677426005 |
| MAGI2-AS3_AC007750.1 | 0.989378672 |
| MAGI2-AS3_LINC01561  | 0.97465488  |
| MAGI2-AS3_LINC01833  | 0.012635833 |
| MAGI2-AS3_LINC00460  | 0.217829259 |
| MAGI2-AS3_LINC00536  | 8.14E-06    |
| MAGI2-AS3_AP000553.1 | 0.915724109 |
| MAGI2-AS3_AATBC      | 0.067086981 |
| MAGI2-AS3_AL161431.1 | 0.059700593 |
| MAGI2-AS3_PICSAR     | 0.831534593 |
| MAGI2-AS3_LINC01615  | 0.085510612 |
| MAGI2-AS3_LINC00641  | 0.139929044 |
| MAGI2-AS3_MIR133A1HG | 0.444611284 |
| MAGI2-AS3_AC104984.6 | 0.617489274 |
| MAGI2-AS3_AL023755.1 | 0.300204424 |

---

---

|                      |             |
|----------------------|-------------|
| MAGI2-AS3_AL359851.1 | 0.212852055 |
| MAGI2-AS3_AC015923.1 | 0.098383299 |
| MAGI2-AS3_AC005828.1 | 0.724948825 |
| MAGI2-AS3_AC023034.1 | 0.158401573 |
| MAGI2-AS3_AC099811.5 | 0.997297611 |
| MAGI2-AS3_FP325330.3 | 0.026632584 |
| MAGI2-AS3_AL355075.4 | 0.601595079 |
| MAGI2-AS3_RMRP       | 0.000579441 |
| MAGI2-AS3_AC037487.2 | 0.075314771 |
| MAGI2-AS3_AC006141.1 | 0.712773903 |
| MAGI2-AS3_LINC02443  | 0.184881321 |
| MAGI2-AS3_LINC02465  | 0.989335393 |
| MAGI2-AS3_AC091906.1 | 0.314073376 |
| CARMN_AL445423.1     | 0.763080246 |
| CARMN_AC134312.5     | 0.680351118 |
| CARMN_AC090825.1     | 0.350591528 |
| CARMN_ADAMTS9-AS1    | 0.03794082  |
| CARMN_MEF2C-AS1      | 0.155066013 |
| CARMN_LINC01778      | 0.105247147 |
| CARMN_AF001548.1     | 0.22756964  |
| CARMN_AC002398.2     | 0.170554556 |
| CARMN_AL662860.1     | 0.646829788 |
| CARMN_AC079313.1     | 0.857952244 |
| CARMN_AC131097.4     | 0.345470301 |
| CARMN_AC092376.2     | 0.209882932 |
| CARMN_AC053503.4     | 0.039567602 |
| CARMN_AC027449.1     | 0.87338362  |
| CARMN_AP001189.1     | 0.662274406 |
| CARMN_AC005180.1     | 0.677724643 |
| CARMN_FENDRR         | 0.006420594 |
| CARMN_LINC02202      | 0.260097677 |
| CARMN_AP003071.4     | 0.119833699 |
| CARMN_AL365214.2     | 0.312645329 |
| CARMN_ADAMTS9-AS2    | 0.543204354 |
| CARMN_AP001107.5     | 0.284100129 |
| CARMN_AC087521.1     | 0.848343978 |
| CARMN_AC007671.1     | 0.621237838 |
| CARMN_LINC01081      | 0.894973357 |
| CARMN_HAND2-AS1      | 0.490916824 |
| CARMN_AC005180.2     | 0.242742437 |
| CARMN_LINC00702      | 0.125558727 |
| CARMN_MBNL1-AS1      | 0.179224151 |
| CARMN_LINC01614      | 0.04321467  |
| CARMN_MIR100HG       | 0.760526762 |

---

---

|                  |             |
|------------------|-------------|
| CARMN_JAZF1-AS1  | 0.907204679 |
| CARMN_AC022893.1 | 0.79788335  |
| CARMN_ACTA2-AS1  | 0.087391154 |
| CARMN_AP003071.3 | 0.127683275 |
| CARMN_LINC01352  | 0.805049052 |
| CARMN_AC134312.1 | 0.329790308 |
| CARMN_AC091588.3 | 0.991382501 |
| CARMN_HLX-AS1    | 0.838759579 |
| CARMN_LINC00402  | 0.069434927 |
| CARMN_LINC01781  | 0.595235202 |
| CARMN_AC007128.1 | 0.340812516 |
| CARMN_AC099850.3 | 0.354835519 |
| CARMN_AC010655.2 | 0.851966664 |
| CARMN_LINC00941  | 0.801775131 |
| CARMN_MYOSLID    | 0.701558714 |
| CARMN_AL161772.1 | 0.555144872 |
| CARMN_AP005432.2 | 0.032402342 |
| CARMN_AC099066.2 | 0.850990608 |
| CARMN_CDKN2B-AS1 | 0.053313226 |
| CARMN_AL449423.1 | 0.624095843 |
| CARMN_AL445490.1 | 0.384069861 |
| CARMN_AC004988.1 | 0.107060594 |
| CARMN_LINC02195  | 0.237150625 |
| CARMN_AC090125.1 | 0.918199918 |
| CARMN_LINC01048  | 0.926269472 |
| CARMN_AC090673.1 | 0.414907491 |
| CARMN_AL356417.2 | 0.263913644 |
| CARMN_AC007750.1 | 0.797981197 |
| CARMN_LINC01561  | 0.662351473 |
| CARMN_LINC01833  | 0.169638835 |
| CARMN_LINC00460  | 0.853035205 |
| CARMN_LINC00536  | 0.054734436 |
| CARMN_AP000553.1 | 0.78965384  |
| CARMN_AATBC      | 0.238382608 |
| CARMN_AL161431.1 | 0.007071572 |
| CARMN_PICSAR     | 0.303630376 |
| CARMN_LINC01615  | 0.722469614 |
| CARMN_LINC00641  | 0.109885371 |
| CARMN_MIR133A1HG | 0.156551092 |
| CARMN_AC104984.6 | 0.214642867 |
| CARMN_AL023755.1 | 0.144946059 |
| CARMN_AL359851.1 | 0.177569584 |
| CARMN_AC015923.1 | 0.002991827 |
| CARMN_AC005828.1 | 0.029119543 |

---

---

|                         |              |
|-------------------------|--------------|
| CARMN_AC023034. 1       | 0. 27366129  |
| CARMN_AC099811. 5       | 0. 842291368 |
| CARMN_FP325330. 3       | 0. 010334867 |
| CARMN_AL355075. 4       | 0. 281023504 |
| CARMN_RMRP              | 0. 367689655 |
| CARMN_AC037487. 2       | 0. 359494453 |
| CARMN_AC006141. 1       | 0. 638598204 |
| CARMN_LINC02443         | 0. 169140428 |
| CARMN_MIR181A1HG        | 0. 866241882 |
| CARMN_LINC02465         | 0. 823500706 |
| CARMN_AC091906. 1       | 0. 304364265 |
| AL445423. 1_AC134312. 5 | 0. 067583192 |
| AL445423. 1_AC090825. 1 | 0. 975276719 |
| AL445423. 1_ADAMTS9-AS1 | 0. 926057049 |
| AL445423. 1_MEF2C-AS1   | 0. 714784292 |
| AL445423. 1_LINC01778   | 0. 940320898 |
| AL445423. 1_AF001548. 1 | 0. 985486654 |
| AL445423. 1_AC002398. 2 | 0. 906270913 |
| AL445423. 1_AL662860. 1 | 0. 876861623 |
| AL445423. 1_AC079313. 1 | 0. 566261892 |
| AL445423. 1_AC131097. 4 | 0. 591520259 |
| AL445423. 1_AC092376. 2 | 0. 936768262 |
| AL445423. 1_AC053503. 4 | 0. 146049409 |
| AL445423. 1_AC027449. 1 | 0. 970964168 |
| AL445423. 1_AP001189. 1 | 0. 611814169 |
| AL445423. 1_AC005180. 1 | 0. 458263323 |
| AL445423. 1_FENDRR      | 0. 728468019 |
| AL445423. 1_LINC02202   | 0. 677158211 |
| AL445423. 1_AP003071. 4 | 0. 609319858 |
| AL445423. 1_AL365214. 2 | 0. 88916944  |
| AL445423. 1_ADAMTS9-AS2 | 0. 698432194 |
| AL445423. 1_AP001107. 5 | 0. 066390824 |
| AL445423. 1_AC087521. 1 | 0. 484502572 |
| AL445423. 1_AC007671. 1 | 0. 658359447 |
| AL445423. 1_LINC01081   | 0. 408384303 |
| AL445423. 1_HAND2-AS1   | 0. 453653568 |
| AL445423. 1_AC005180. 2 | 0. 154914129 |
| AL445423. 1_LINC00702   | 0. 034493651 |
| AL445423. 1_MBNL1-AS1   | 0. 996590863 |
| AL445423. 1_LINC01614   | 0. 011569176 |
| AL445423. 1_MIR100HG    | 0. 279059879 |
| AL445423. 1_JAZF1-AS1   | 0. 896560852 |
| AL445423. 1_AC022893. 1 | 0. 398508924 |
| AL445423. 1_ACTA2-AS1   | 0. 822289868 |

---

---

|                       |             |
|-----------------------|-------------|
| AL445423.1_AP003071.3 | 0.86798575  |
| AL445423.1_LINC01352  | 0.24362232  |
| AL445423.1_AC134312.1 | 0.829809148 |
| AL445423.1_AC091588.3 | 0.579026492 |
| AL445423.1_HLX-AS1    | 0.873153944 |
| AL445423.1_LINC00402  | 0.739267181 |
| AL445423.1_LINC01781  | 0.894010666 |
| AL445423.1_AC007128.1 | 0.930766021 |
| AL445423.1_AC099850.3 | 0.13058989  |
| AL445423.1_AC010655.2 | 0.106098491 |
| AL445423.1_LINC00941  | 0.74462203  |
| AL445423.1_MYOSLID    | 0.723474764 |
| AL445423.1_AL161772.1 | 0.768613946 |
| AL445423.1_AP005432.2 | 0.265478592 |
| AL445423.1_AC099066.2 | 0.611749198 |
| AL445423.1_CDKN2B-AS1 | 0.864238314 |
| AL445423.1_AL449423.1 | 0.70629228  |
| AL445423.1_AL445490.1 | 0.276189243 |
| AL445423.1_AC004988.1 | 0.258452624 |
| AL445423.1_LINC02195  | 0.406731469 |
| AL445423.1_AC090125.1 | 0.309161327 |
| AL445423.1_LINC01048  | 0.665554075 |
| AL445423.1_AC090673.1 | 0.95390935  |
| AL445423.1_AL356417.2 | 0.235422877 |
| AL445423.1_AC007750.1 | 0.836508026 |
| AL445423.1_LINC01561  | 0.771206699 |
| AL445423.1_LINC01833  | 0.501884466 |
| AL445423.1_LINC00460  | 0.233370436 |
| AL445423.1_LINC00536  | 0.703596831 |
| AL445423.1_AP000553.1 | 0.928042184 |
| AL445423.1_AATBC      | 0.230510982 |
| AL445423.1_AL161431.1 | 0.051241029 |
| AL445423.1_PICSAR     | 0.90980408  |
| AL445423.1_LINC01615  | 0.03529139  |
| AL445423.1_LINC00641  | 0.091992737 |
| AL445423.1_MIR133A1HG | 0.916978062 |
| AL445423.1_AC104984.6 | 0.624826213 |
| AL445423.1_AL023755.1 | 0.483298249 |
| AL445423.1_AL359851.1 | 0.967354393 |
| AL445423.1_AC015923.1 | 0.515623398 |
| AL445423.1_AC005828.1 | 0.573174481 |
| AL445423.1_AC023034.1 | 0.782035944 |
| AL445423.1_AC099811.5 | 0.45150802  |
| AL445423.1_FP325330.3 | 0.354075914 |

---



---

|                        |             |
|------------------------|-------------|
| AL445423.1_AL355075.4  | 0.779442423 |
| AL445423.1_RMRP        | 0.76064857  |
| AL445423.1_AC037487.2  | 0.97452236  |
| AL445423.1_AC006141.1  | 0.934817137 |
| AL445423.1_LINC02443   | 0.568443431 |
| AL445423.1_MIR181A1HG  | 0.951252024 |
| AL445423.1_LINC02465   | 0.954207644 |
| AL445423.1_AC091906.1  | 0.759439456 |
| AC134312.5_AC090825.1  | 0.913430322 |
| AC134312.5_ADAMTS9-AS1 | 0.897695695 |
| AC134312.5_MEF2C-AS1   | 0.614095481 |
| AC134312.5_LINC01778   | 0.236947373 |
| AC134312.5_AF001548.1  | 0.518154983 |
| AC134312.5_AC002398.2  | 0.887444469 |
| AC134312.5_AL662860.1  | 0.873826729 |
| AC134312.5_AC079313.1  | 0.298608625 |
| AC134312.5_AC131097.4  | 0.963809931 |
| AC134312.5_AC092376.2  | 0.486600058 |
| AC134312.5_AC053503.4  | 0.355379205 |
| AC134312.5_AC027449.1  | 0.648964621 |
| AC134312.5_AP001189.1  | 0.824928725 |
| AC134312.5_AC005180.1  | 0.528272801 |
| AC134312.5_FENDRR      | 0.742259501 |
| AC134312.5_LINC02202   | 0.369728199 |
| AC134312.5_AP003071.4  | 0.875965429 |
| AC134312.5_AL365214.2  | 0.275445766 |
| AC134312.5_ADAMTS9-AS2 | 0.975542474 |
| AC134312.5_AP001107.5  | 0.748177346 |
| AC134312.5_AC087521.1  | 0.271981828 |
| AC134312.5_AC007671.1  | 0.235142567 |
| AC134312.5_LINC01081   | 0.708860203 |
| AC134312.5_HAND2-AS1   | 0.297363013 |
| AC134312.5_AC005180.2  | 0.228967921 |
| AC134312.5_LINC00702   | 0.746074175 |
| AC134312.5_MBNL1-AS1   | 0.21242532  |
| AC134312.5_LINC01614   | 0.344265579 |
| AC134312.5_MIR100HG    | 0.149058436 |
| AC134312.5_JAZF1-AS1   | 0.84448696  |
| AC134312.5_AC022893.1  | 0.308241863 |
| AC134312.5_ACTA2-AS1   | 0.137001666 |
| AC134312.5_AP003071.3  | 0.823648955 |
| AC134312.5_LINC01352   | 0.269756909 |
| AC134312.5_AC134312.1  | 0.888217067 |
| AC134312.5_AC091588.3  | 0.877429704 |

---

---

|                       |             |
|-----------------------|-------------|
| AC134312.5_HLX-AS1    | 0.724761946 |
| AC134312.5_LINC00402  | 0.682283833 |
| AC134312.5_LINC01781  | 0.723103664 |
| AC134312.5_AC007128.1 | 0.12368055  |
| AC134312.5_AC099850.3 | 0.052136699 |
| AC134312.5_AC010655.2 | 0.403146561 |
| AC134312.5_LINC00941  | 0.461513959 |
| AC134312.5_MYOSLID    | 0.830665427 |
| AC134312.5_AL161772.1 | 0.774378633 |
| AC134312.5_AP005432.2 | 0.198020761 |
| AC134312.5_AC099066.2 | 0.190770522 |
| AC134312.5_CDKN2B-AS1 | 0.305254312 |
| AC134312.5_AL449423.1 | 0.633424439 |
| AC134312.5_AL445490.1 | 0.339709154 |
| AC134312.5_U62317.2   | 0.304831993 |
| AC134312.5_AC004988.1 | 0.466149614 |
| AC134312.5_LINC02195  | 0.018152359 |
| AC134312.5_AC090125.1 | 0.416120125 |
| AC134312.5_LINC01048  | 0.578647951 |
| AC134312.5_AC090673.1 | 0.716555782 |
| AC134312.5_AL356417.2 | 0.631846707 |
| AC134312.5_AC007750.1 | 0.752539161 |
| AC134312.5_LINC01561  | 0.936390081 |
| AC134312.5_LINC01833  | 0.121980265 |
| AC134312.5_LINC00460  | 0.063136131 |
| AC134312.5_LINC00536  | 0.406655276 |
| AC134312.5_AP000553.1 | 0.838675094 |
| AC134312.5_AATBC      | 0.019616239 |
| AC134312.5_AL161431.1 | 0.24046929  |
| AC134312.5_PICAR      | 0.412656928 |
| AC134312.5_LINC01615  | 0.727275395 |
| AC134312.5_LINC00641  | 0.026855154 |
| AC134312.5_MIR133A1HG | 0.142562995 |
| AC134312.5_AC104984.6 | 0.860968626 |
| AC134312.5_AL023755.1 | 0.10522879  |
| AC134312.5_AL359851.1 | 0.148899893 |
| AC134312.5_AC015923.1 | 0.125021791 |
| AC134312.5_AC005828.1 | 0.512762846 |
| AC134312.5_AC023034.1 | 0.281194476 |
| AC134312.5_AC099811.5 | 0.934973694 |
| AC134312.5_FP325330.3 | 0.030834402 |
| AC134312.5_AL355075.4 | 0.725642761 |
| AC134312.5_RMRP       | 0.380301559 |
| AC134312.5_AC037487.2 | 0.963332066 |

---

---

|                        |             |
|------------------------|-------------|
| AC134312.5_AC006141.1  | 0.225586226 |
| AC134312.5_LINC02443   | 0.084396373 |
| AC134312.5_MIR181A1HG  | 0.288040645 |
| AC134312.5_LINC02465   | 0.402206696 |
| AC134312.5_AC091906.1  | 0.030752994 |
| AC090825.1_ADAMTS9-AS1 | 0.02016342  |
| AC090825.1_MEF2C-AS1   | 0.885512926 |
| AC090825.1_LINC01778   | 0.605436048 |
| AC090825.1_AF001548.1  | 0.950745118 |
| AC090825.1_AC002398.2  | 0.032520618 |
| AC090825.1_AL662860.1  | 0.538835595 |
| AC090825.1_AC079313.1  | 0.822712622 |
| AC090825.1_AC131097.4  | 0.469643304 |
| AC090825.1_AC092376.2  | 0.479821551 |
| AC090825.1_AC053503.4  | 0.248969359 |
| AC090825.1_AC027449.1  | 0.2867515   |
| AC090825.1_AP001189.1  | 0.178828911 |
| AC090825.1_AC005180.1  | 0.893475554 |
| AC090825.1_FENDRR      | 0.067365142 |
| AC090825.1_LINC02202   | 0.567456933 |
| AC090825.1_AP003071.4  | 0.765751519 |
| AC090825.1_AL365214.2  | 0.857739876 |
| AC090825.1_ADAMTS9-AS2 | 0.739193991 |
| AC090825.1_AP001107.5  | 0.236654816 |
| AC090825.1_AC087521.1  | 0.561552417 |
| AC090825.1_AC007671.1  | 0.582797052 |
| AC090825.1_LINC01081   | 0.990374204 |
| AC090825.1_HAND2-AS1   | 0.055236642 |
| AC090825.1_AC005180.2  | 0.08771262  |
| AC090825.1_LINC00702   | 0.340027833 |
| AC090825.1_MBNL1-AS1   | 0.948103308 |
| AC090825.1_LINC01614   | 0.28010282  |
| AC090825.1_MIR100HG    | 0.548353355 |
| AC090825.1_JAZF1-AS1   | 0.693882124 |
| AC090825.1_AC022893.1  | 0.725182688 |
| AC090825.1_ACTA2-AS1   | 0.254338325 |
| AC090825.1_AP003071.3  | 0.293045291 |
| AC090825.1_LINC01352   | 0.616956645 |
| AC090825.1_AC134312.1  | 0.550843616 |
| AC090825.1_AC091588.3  | 0.489174995 |
| AC090825.1_HLX-AS1     | 0.152307781 |
| AC090825.1_LINC00402   | 0.679861086 |
| AC090825.1_LINC01781   | 0.381093886 |
| AC090825.1_AC007128.1  | 0.683740355 |

---

---

|                       |             |
|-----------------------|-------------|
| AC090825.1_AC099850.3 | 0.455563488 |
| AC090825.1_AC010655.2 | 0.439297027 |
| AC090825.1_LINC00941  | 0.414743988 |
| AC090825.1_MYOSLID    | 0.375139388 |
| AC090825.1_AL161772.1 | 0.397639079 |
| AC090825.1_AP005432.2 | 0.376311178 |
| AC090825.1_AC099066.2 | 0.602958016 |
| AC090825.1_CDKN2B-AS1 | 0.391953181 |
| AC090825.1_AL449423.1 | 0.856201322 |
| AC090825.1_AL445490.1 | 0.76115534  |
| AC090825.1_AC004988.1 | 0.452654408 |
| AC090825.1_LINC02195  | 0.05602311  |
| AC090825.1_AC090125.1 | 0.204165185 |
| AC090825.1_LINC01048  | 0.285260463 |
| AC090825.1_AC090673.1 | 0.374859346 |
| AC090825.1_AL356417.2 | 0.46895251  |
| AC090825.1_AC007750.1 | 0.520697512 |
| AC090825.1_LINC01561  | 0.889727645 |
| AC090825.1_LINC01833  | 0.699885742 |
| AC090825.1_LINC00460  | 0.746485717 |
| AC090825.1_LINC00536  | 0.123254744 |
| AC090825.1_AP000553.1 | 0.393356677 |
| AC090825.1_AATBC      | 0.176733013 |
| AC090825.1_AL161431.1 | 0.217790534 |
| AC090825.1_PICSA      | 0.123674284 |
| AC090825.1_LINC01615  | 0.503401216 |
| AC090825.1_LINC00641  | 0.72050813  |
| AC090825.1_MIR133A1HG | 0.900955918 |
| AC090825.1_AC104984.6 | 0.080519977 |
| AC090825.1_AL023755.1 | 0.69006097  |
| AC090825.1_AL359851.1 | 0.436358609 |
| AC090825.1_AC015923.1 | 0.156243596 |
| AC090825.1_AC005828.1 | 0.102279219 |
| AC090825.1_AC023034.1 | 0.909761309 |
| AC090825.1_AC099811.5 | 0.404901092 |
| AC090825.1_FP325330.3 | 0.478580064 |
| AC090825.1_AL355075.4 | 0.642428697 |
| AC090825.1_RMRP       | 0.815443498 |
| AC090825.1_AC037487.2 | 0.225096235 |
| AC090825.1_AC006141.1 | 0.53300053  |
| AC090825.1_LINC02443  | 0.330809649 |
| AC090825.1_MIR181A1HG | 0.842200873 |
| AC090825.1_LINC02465  | 0.869433758 |
| AC090825.1_AC091906.1 | 0.738186748 |

---

---

|                         |             |
|-------------------------|-------------|
| ADAMTS9-AS1_MEF2C-AS1   | 0.318446127 |
| ADAMTS9-AS1_LINC01778   | 0.001366957 |
| ADAMTS9-AS1_AF001548.1  | 0.137127726 |
| ADAMTS9-AS1_AC002398.2  | 0.622038179 |
| ADAMTS9-AS1_AL662860.1  | 0.111040948 |
| ADAMTS9-AS1_AC079313.1  | 0.211380945 |
| ADAMTS9-AS1_AC131097.4  | 0.122898383 |
| ADAMTS9-AS1_AC092376.2  | 0.03298668  |
| ADAMTS9-AS1_AC053503.4  | 0.043191427 |
| ADAMTS9-AS1_AC027449.1  | 0.654529407 |
| ADAMTS9-AS1_AP001189.1  | 0.064921015 |
| ADAMTS9-AS1_AC005180.1  | 0.417470354 |
| ADAMTS9-AS1_FENDRR      | 3.88E-05    |
| ADAMTS9-AS1_LINC02202   | 0.04217057  |
| ADAMTS9-AS1_AP003071.4  | 0.031041713 |
| ADAMTS9-AS1_AL365214.2  | 0.011295549 |
| ADAMTS9-AS1_ADAMTS9-AS2 | 0.019996703 |
| ADAMTS9-AS1_AP001107.5  | 0.903518083 |
| ADAMTS9-AS1_AC087521.1  | 0.005603343 |
| ADAMTS9-AS1_AC007671.1  | 0.039938289 |
| ADAMTS9-AS1_LINC01081   | 0.7241333   |
| ADAMTS9-AS1_HAND2-AS1   | 0.012000188 |
| ADAMTS9-AS1_AC005180.2  | 0.279362416 |
| ADAMTS9-AS1_LINC00702   | 0.990848961 |
| ADAMTS9-AS1_MBNL1-AS1   | 0.832396911 |
| ADAMTS9-AS1_LINC01614   | 0.22407335  |
| ADAMTS9-AS1_MIR100HG    | 0.684501966 |
| ADAMTS9-AS1_JAZF1-AS1   | 0.101809995 |
| ADAMTS9-AS1_AC022893.1  | 0.120336332 |
| ADAMTS9-AS1_ACTA2-AS1   | 0.013625588 |
| ADAMTS9-AS1_AP003071.3  | 0.893682222 |
| ADAMTS9-AS1_LINC01352   | 0.125102241 |
| ADAMTS9-AS1_AC134312.1  | 0.455398304 |
| ADAMTS9-AS1_AC091588.3  | 0.204772535 |
| ADAMTS9-AS1_HLX-AS1     | 0.843961726 |
| ADAMTS9-AS1_LINC00402   | 0.016598139 |
| ADAMTS9-AS1_LINC01781   | 0.132048941 |
| ADAMTS9-AS1_AC007128.1  | 0.804593003 |
| ADAMTS9-AS1_AC099850.3  | 0.618675112 |
| ADAMTS9-AS1_AC010655.2  | 0.084106155 |
| ADAMTS9-AS1_LINC00941   | 0.111764525 |
| ADAMTS9-AS1_MYOSLID     | 0.110892503 |
| ADAMTS9-AS1_AL161772.1  | 0.432249814 |
| ADAMTS9-AS1_AP005432.2  | 0.153099544 |

---

---

|                         |              |
|-------------------------|--------------|
| ADAMTS9-AS1_AC099066. 2 | 0. 178755657 |
| ADAMTS9-AS1_CDKN2B-AS1  | 0. 003934597 |
| ADAMTS9-AS1_AL449423. 1 | 0. 915227197 |
| ADAMTS9-AS1_AL445490. 1 | 0. 013185293 |
| ADAMTS9-AS1_U62317. 2   | 0. 28732889  |
| ADAMTS9-AS1_AC004988. 1 | 0. 189766083 |
| ADAMTS9-AS1_LINC02195   | 0. 044791092 |
| ADAMTS9-AS1_AC090125. 1 | 0. 800386593 |
| ADAMTS9-AS1_LINC01048   | 0. 433416926 |
| ADAMTS9-AS1_AC090673. 1 | 0. 409664065 |
| ADAMTS9-AS1_AL356417. 2 | 0. 474655397 |
| ADAMTS9-AS1_AC007750. 1 | 0. 045045452 |
| ADAMTS9-AS1_LINC01561   | 0. 722614474 |
| ADAMTS9-AS1_LINC01833   | 0. 474891334 |
| ADAMTS9-AS1_LINC00460   | 0. 72629523  |
| ADAMTS9-AS1_LINC00536   | 0. 455171628 |
| ADAMTS9-AS1_AP000553. 1 | 0. 62778984  |
| ADAMTS9-AS1_AATBC       | 0. 196725817 |
| ADAMTS9-AS1_AL161431. 1 | 0. 031646944 |
| ADAMTS9-AS1_PICSAR      | 0. 041186206 |
| ADAMTS9-AS1_LINC01615   | 0. 449519195 |
| ADAMTS9-AS1_LINC00641   | 0. 462542288 |
| ADAMTS9-AS1_MIR133A1HG  | 0. 025240146 |
| ADAMTS9-AS1_AC104984. 6 | 0. 090566422 |
| ADAMTS9-AS1_AL023755. 1 | 0. 010961999 |
| ADAMTS9-AS1_AL359851. 1 | 0. 014716402 |
| ADAMTS9-AS1_AC015923. 1 | 0. 000394525 |
| ADAMTS9-AS1_AC005828. 1 | 0. 017934383 |
| ADAMTS9-AS1_AC023034. 1 | 0. 098364869 |
| ADAMTS9-AS1_AC099811. 5 | 0. 347524781 |
| ADAMTS9-AS1_FP325330. 3 | 0. 025670917 |
| ADAMTS9-AS1_AL355075. 4 | 0. 060060313 |
| ADAMTS9-AS1_RMRP        | 0. 89987458  |
| ADAMTS9-AS1_AC037487. 2 | 0. 621959874 |
| ADAMTS9-AS1_AC006141. 1 | 0. 016389904 |
| ADAMTS9-AS1_LINC02443   | 0. 078846747 |
| ADAMTS9-AS1_MIR181A1HG  | 0. 073744292 |
| ADAMTS9-AS1_LINC02465   | 0. 059208915 |
| ADAMTS9-AS1_AC091906. 1 | 0. 577494107 |
| MEF2C-AS1_LINC01778     | 0. 065150006 |
| MEF2C-AS1_AF001548. 1   | 0. 4571515   |
| MEF2C-AS1_AC002398. 2   | 0. 422038287 |
| MEF2C-AS1_AL662860. 1   | 0. 904450989 |
| MEF2C-AS1_AC079313. 1   | 0. 410736318 |

---

---

|                       |              |
|-----------------------|--------------|
| MEF2C-AS1_AC131097. 4 | 0. 524975932 |
| MEF2C-AS1_AC092376. 2 | 0. 172441104 |
| MEF2C-AS1_AC053503. 4 | 0. 059052181 |
| MEF2C-AS1_AC027449. 1 | 0. 359827159 |
| MEF2C-AS1_AP001189. 1 | 0. 578112328 |
| MEF2C-AS1_AC005180. 1 | 0. 564560634 |
| MEF2C-AS1_FENDRR      | 0. 036562391 |
| MEF2C-AS1_LINC02202   | 0. 487477482 |
| MEF2C-AS1_AP003071. 4 | 0. 816995348 |
| MEF2C-AS1_AL365214. 2 | 0. 481275105 |
| MEF2C-AS1_ADAMTS9-AS2 | 0. 35543219  |
| MEF2C-AS1_AP001107. 5 | 0. 291101882 |
| MEF2C-AS1_AC087521. 1 | 0. 335321212 |
| MEF2C-AS1_AC007671. 1 | 0. 684330077 |
| MEF2C-AS1_LINC01081   | 0. 547061059 |
| MEF2C-AS1_HAND2-AS1   | 0. 487770338 |
| MEF2C-AS1_AC005180. 2 | 0. 1133898   |
| MEF2C-AS1_LINC00702   | 0. 98172785  |
| MEF2C-AS1_MBNL1-AS1   | 0. 597210342 |
| MEF2C-AS1_LINC01614   | 0. 136590541 |
| MEF2C-AS1_MIR100HG    | 0. 468303085 |
| MEF2C-AS1_JAZF1-AS1   | 0. 678383177 |
| MEF2C-AS1_AC022893. 1 | 0. 805637853 |
| MEF2C-AS1_ACTA2-AS1   | 0. 66500251  |
| MEF2C-AS1_AP003071. 3 | 0. 298560763 |
| MEF2C-AS1_LINC01352   | 0. 904509361 |
| MEF2C-AS1_AC134312. 1 | 0. 685043062 |
| MEF2C-AS1_AC091588. 3 | 0. 863337374 |
| MEF2C-AS1_HLX-AS1     | 0. 145394262 |
| MEF2C-AS1_LINC00402   | 0. 517072552 |
| MEF2C-AS1_LINC01781   | 0. 572066198 |
| MEF2C-AS1_AC007128. 1 | 0. 82148536  |
| MEF2C-AS1_AC099850. 3 | 0. 354835519 |
| MEF2C-AS1_AC010655. 2 | 0. 813224906 |
| MEF2C-AS1_LINC00941   | 0. 535234512 |
| MEF2C-AS1_MYOSLID     | 0. 456886163 |
| MEF2C-AS1_AL161772. 1 | 0. 102078965 |
| MEF2C-AS1_AP005432. 2 | 0. 049366856 |
| MEF2C-AS1_AC099066. 2 | 0. 809387779 |
| MEF2C-AS1_CDKN2B-AS1  | 0. 564918125 |
| MEF2C-AS1_AL449423. 1 | 0. 841987658 |
| MEF2C-AS1_AL445490. 1 | 0. 776927209 |
| MEF2C-AS1_AC004988. 1 | 0. 61875144  |
| MEF2C-AS1_LINC02195   | 0. 820033407 |

---

---

|                      |             |
|----------------------|-------------|
| MEF2C-AS1_AC090125.1 | 0.614237009 |
| MEF2C-AS1_LINC01048  | 0.994715225 |
| MEF2C-AS1_AC090673.1 | 0.14655895  |
| MEF2C-AS1_AL356417.2 | 0.040987985 |
| MEF2C-AS1_AC007750.1 | 0.865945061 |
| MEF2C-AS1_LINC01561  | 0.252492638 |
| MEF2C-AS1_LINC01833  | 0.685060481 |
| MEF2C-AS1_LINC00460  | 0.084780932 |
| MEF2C-AS1_LINC00536  | 0.143876848 |
| MEF2C-AS1_AP000553.1 | 0.958325515 |
| MEF2C-AS1_AATBC      | 0.766413365 |
| MEF2C-AS1_AL161431.1 | 0.013016614 |
| MEF2C-AS1_PICSAR     | 0.210169266 |
| MEF2C-AS1_LINC01615  | 0.56067219  |
| MEF2C-AS1_MIR133A1HG | 0.432150827 |
| MEF2C-AS1_AC104984.6 | 0.246697362 |
| MEF2C-AS1_AL023755.1 | 0.076202839 |
| MEF2C-AS1_AL359851.1 | 0.128325256 |
| MEF2C-AS1_AC015923.1 | 0.082028764 |
| MEF2C-AS1_AC005828.1 | 0.260148481 |
| MEF2C-AS1_AC023034.1 | 0.968679157 |
| MEF2C-AS1_AC099811.5 | 0.287221112 |
| MEF2C-AS1_FP325330.3 | 0.487867565 |
| MEF2C-AS1_AL355075.4 | 0.041832463 |
| MEF2C-AS1_RMRP       | 0.661577041 |
| MEF2C-AS1_AC037487.2 | 0.20026512  |
| MEF2C-AS1_AC006141.1 | 0.500630064 |
| MEF2C-AS1_LINC02443  | 0.249253002 |
| MEF2C-AS1_MIR181A1HG | 0.817638799 |
| MEF2C-AS1_LINC02465  | 0.41892673  |
| MEF2C-AS1_AC091906.1 | 0.914128012 |
| LINC01778_AF001548.1 | 0.096844467 |
| LINC01778_AC002398.2 | 0.023604986 |
| LINC01778_AL662860.1 | 0.162746791 |
| LINC01778_AC079313.1 | 0.962526521 |
| LINC01778_AC131097.4 | 0.85372158  |
| LINC01778_AC092376.2 | 0.438323842 |
| LINC01778_AC053503.4 | 0.003155965 |
| LINC01778_AC027449.1 | 0.573408462 |
| LINC01778_AP001189.1 | 0.155218612 |
| LINC01778_AC005180.1 | 0.107215044 |
| LINC01778_FENDRR     | 0.827918752 |
| LINC01778_LINC02202  | 0.72156064  |
| LINC01778_AP003071.4 | 0.135295579 |

---



---

|                       |              |
|-----------------------|--------------|
| LINC01778_AL365214. 2 | 0. 963174866 |
| LINC01778_ADAMTS9-AS2 | 0. 047765765 |
| LINC01778_AP001107. 5 | 0. 057867526 |
| LINC01778_AC087521. 1 | 0. 466357528 |
| LINC01778_AC007671. 1 | 0. 612523673 |
| LINC01778_LINC01081   | 0. 215775835 |
| LINC01778_HAND2-AS1   | 0. 0958909   |
| LINC01778_AC005180. 2 | 0. 669469124 |
| LINC01778_LINC00702   | 0. 343346369 |
| LINC01778_MBNL1-AS1   | 0. 564661434 |
| LINC01778_LINC01614   | 0. 084469631 |
| LINC01778_MIR100HG    | 0. 158150625 |
| LINC01778_JAZF1-AS1   | 0. 30125581  |
| LINC01778_AC022893. 1 | 0. 142970034 |
| LINC01778_ACTA2-AS1   | 0. 290968414 |
| LINC01778_AP003071. 3 | 0. 163325606 |
| LINC01778_LINC01352   | 0. 502121508 |
| LINC01778_AC134312. 1 | 0. 080498382 |
| LINC01778_AC091588. 3 | 0. 934930777 |
| LINC01778_HLX-AS1     | 0. 221282512 |
| LINC01778_LINC00402   | 0. 748615074 |
| LINC01778_LINC01781   | 0. 056725184 |
| LINC01778_AC007128. 1 | 0. 719143987 |
| LINC01778_AC099850. 3 | 0. 42748968  |
| LINC01778_AC010655. 2 | 0. 912357638 |
| LINC01778_LINC00941   | 0. 287629653 |
| LINC01778_MYOSLID     | 0. 559125048 |
| LINC01778_AL161772. 1 | 0. 48903308  |
| LINC01778_AP005432. 2 | 0. 353185766 |
| LINC01778_AC099066. 2 | 0. 1505472   |
| LINC01778_CDKN2B-AS1  | 0. 424040319 |
| LINC01778_AL449423. 1 | 0. 919012058 |
| LINC01778_AL445490. 1 | 0. 85411246  |
| LINC01778_AC004988. 1 | 0. 55690523  |
| LINC01778_LINC02195   | 0. 636377106 |
| LINC01778_AC090125. 1 | 0. 158309939 |
| LINC01778_LINC01048   | 0. 181073864 |
| LINC01778_AC090673. 1 | 0. 021819268 |
| LINC01778_AL356417. 2 | 0. 322443647 |
| LINC01778_AC007750. 1 | 0. 157020563 |
| LINC01778_LINC01561   | 0. 154209048 |
| LINC01778_LINC01833   | 0. 725780447 |
| LINC01778_LINC00460   | 0. 344980139 |
| LINC01778_LINC00536   | 0. 020103606 |

---

---

|                         |              |
|-------------------------|--------------|
| LINC01778_AP000553. 1   | 0. 139291374 |
| LINC01778_AATBC         | 0. 179877982 |
| LINC01778_AL161431. 1   | 0. 092416383 |
| LINC01778_PICSAR        | 0. 291614498 |
| LINC01778_LINC01615     | 0. 679948355 |
| LINC01778_LINC00641     | 0. 909384629 |
| LINC01778_MIR133A1HG    | 0. 104854912 |
| LINC01778_AC104984. 6   | 0. 629121492 |
| LINC01778_AL023755. 1   | 0. 997408288 |
| LINC01778_AL359851. 1   | 0. 136072448 |
| LINC01778_AC015923. 1   | 0. 218343277 |
| LINC01778_AC005828. 1   | 0. 494623872 |
| LINC01778_AC023034. 1   | 0. 494991011 |
| LINC01778_AC099811. 5   | 0. 291061135 |
| LINC01778_FP325330. 3   | 0. 624572713 |
| LINC01778_AL355075. 4   | 0. 876073286 |
| LINC01778_RMRP          | 0. 502740553 |
| LINC01778_AC037487. 2   | 0. 292339488 |
| LINC01778_AC006141. 1   | 0. 474543523 |
| LINC01778_LINC02443     | 0. 830632822 |
| LINC01778_MIR181A1HG    | 0. 054509541 |
| LINC01778_LINC02465     | 0. 137963973 |
| LINC01778_AC091906. 1   | 0. 888558803 |
| AF001548. 1_AC002398. 2 | 0. 154551533 |
| AF001548. 1_AL662860. 1 | 0. 4113311   |
| AF001548. 1_AC079313. 1 | 0. 773505573 |
| AF001548. 1_AC131097. 4 | 0. 763200283 |
| AF001548. 1_AC092376. 2 | 0. 261931031 |
| AF001548. 1_AC053503. 4 | 0. 048692653 |
| AF001548. 1_AC027449. 1 | 0. 514345981 |
| AF001548. 1_AP001189. 1 | 0. 024584129 |
| AF001548. 1_AC005180. 1 | 0. 067364075 |
| AF001548. 1_FENDRR      | 0. 834752491 |
| AF001548. 1_LINC02202   | 0. 420992952 |
| AF001548. 1_AP003071. 4 | 0. 809168584 |
| AF001548. 1_AL365214. 2 | 0. 205473285 |
| AF001548. 1_ADAMTS9-AS2 | 0. 192802263 |
| AF001548. 1_AP001107. 5 | 0. 239096465 |
| AF001548. 1_AC087521. 1 | 0. 118812578 |
| AF001548. 1_AC007671. 1 | 0. 14882377  |
| AF001548. 1_LINC01081   | 0. 398623697 |
| AF001548. 1_HAND2-AS1   | 0. 118742469 |
| AF001548. 1_AC005180. 2 | 0. 788473304 |
| AF001548. 1_LINC00702   | 0. 024720561 |

---

---

|                       |             |
|-----------------------|-------------|
| AF001548.1_MBNL1-AS1  | 0.025336532 |
| AF001548.1_LINC01614  | 0.195408443 |
| AF001548.1_MIR100HG   | 0.455631198 |
| AF001548.1_JAZF1-AS1  | 0.633982556 |
| AF001548.1_AC022893.1 | 0.167443052 |
| AF001548.1_ACTA2-AS1  | 0.849538916 |
| AF001548.1_AP003071.3 | 0.682005626 |
| AF001548.1_LINC01352  | 0.28823178  |
| AF001548.1_AC134312.1 | 0.338086175 |
| AF001548.1_AC091588.3 | 0.324189779 |
| AF001548.1_HLX-AS1    | 0.266468569 |
| AF001548.1_LINC00402  | 0.703142961 |
| AF001548.1_LINC01781  | 0.516889356 |
| AF001548.1_AC007128.1 | 0.922992866 |
| AF001548.1_AC099850.3 | 0.384656464 |
| AF001548.1_AC010655.2 | 0.221262939 |
| AF001548.1_LINC00941  | 0.881359235 |
| AF001548.1_MYOSLID    | 0.862891497 |
| AF001548.1_AL161772.1 | 0.822010299 |
| AF001548.1_AP005432.2 | 0.416869157 |
| AF001548.1_AC099066.2 | 0.436869722 |
| AF001548.1_CDKN2B-AS1 | 0.943485704 |
| AF001548.1_AL449423.1 | 0.582525262 |
| AF001548.1_AL445490.1 | 0.533555275 |
| AF001548.1_U62317.2   | 0.588845637 |
| AF001548.1_AC004988.1 | 0.854582204 |
| AF001548.1_LINC02195  | 0.009937329 |
| AF001548.1_AC090125.1 | 0.455985911 |
| AF001548.1_LINC01048  | 0.112985327 |
| AF001548.1_AC090673.1 | 0.106221244 |
| AF001548.1_AL356417.2 | 0.364140851 |
| AF001548.1_AC007750.1 | 0.770472141 |
| AF001548.1_LINC01561  | 0.392197332 |
| AF001548.1_LINC01833  | 0.210451904 |
| AF001548.1_LINC00460  | 0.367245483 |
| AF001548.1_LINC00536  | 0.17865152  |
| AF001548.1_AP000553.1 | 0.652120319 |
| AF001548.1_AATBC      | 0.168634779 |
| AF001548.1_AL161431.1 | 0.083532423 |
| AF001548.1_PICSAR     | 0.282944566 |
| AF001548.1_LINC01615  | 0.705754223 |
| AF001548.1_LINC00641  | 0.146057192 |
| AF001548.1_MIR133A1HG | 0.569242884 |
| AF001548.1_AC104984.6 | 0.87238891  |

---

---

|                        |             |
|------------------------|-------------|
| AF001548.1_AL023755.1  | 0.661371763 |
| AF001548.1_AL359851.1  | 0.450479501 |
| AF001548.1_AC015923.1  | 0.531239914 |
| AF001548.1_AC005828.1  | 0.460882723 |
| AF001548.1_AC023034.1  | 0.503318126 |
| AF001548.1_AC099811.5  | 0.190201073 |
| AF001548.1_FP325330.3  | 0.943261239 |
| AF001548.1_AL355075.4  | 0.703801897 |
| AF001548.1_RMRP        | 0.467018627 |
| AF001548.1_AC037487.2  | 0.512010871 |
| AF001548.1_AC006141.1  | 0.882793134 |
| AF001548.1_LINC02443   | 0.661756945 |
| AF001548.1_MIR181A1HG  | 0.199304759 |
| AF001548.1_LINC02465   | 0.471367279 |
| AF001548.1_AC091906.1  | 0.312820039 |
| AC002398.2_AL662860.1  | 0.814784934 |
| AC002398.2_AC079313.1  | 0.986345769 |
| AC002398.2_AC131097.4  | 0.195097262 |
| AC002398.2_AC092376.2  | 0.299834183 |
| AC002398.2_AC053503.4  | 0.930704482 |
| AC002398.2_AC027449.1  | 0.64128444  |
| AC002398.2_AP001189.1  | 0.777006522 |
| AC002398.2_AC005180.1  | 0.935312788 |
| AC002398.2_FENDRR      | 0.001382599 |
| AC002398.2_LINC02202   | 0.037622404 |
| AC002398.2_AP003071.4  | 0.017232783 |
| AC002398.2_AL365214.2  | 0.149880878 |
| AC002398.2_ADAMTS9-AS2 | 0.881215869 |
| AC002398.2_AP001107.5  | 0.474833839 |
| AC002398.2_AC087521.1  | 0.051351777 |
| AC002398.2_AC007671.1  | 0.308763045 |
| AC002398.2_LINC01081   | 0.133300299 |
| AC002398.2_HAND2-AS1   | 0.395149864 |
| AC002398.2_AC005180.2  | 0.000364432 |
| AC002398.2_LINC00702   | 0.819597589 |
| AC002398.2_MBNL1-AS1   | 0.001106669 |
| AC002398.2_LINC01614   | 0.715704019 |
| AC002398.2_MIR100HG    | 0.937684519 |
| AC002398.2_JAZF1-AS1   | 0.519104142 |
| AC002398.2_AC022893.1  | 0.639062476 |
| AC002398.2_ACTA2-AS1   | 0.116659109 |
| AC002398.2_AP003071.3  | 0.207286386 |
| AC002398.2_LINC01352   | 0.639357353 |
| AC002398.2_AC134312.1  | 0.410756151 |

---

---

|                       |             |
|-----------------------|-------------|
| AC002398.2_AC091588.3 | 0.67666041  |
| AC002398.2_HLX-AS1    | 0.65497934  |
| AC002398.2_LINC00402  | 0.194307218 |
| AC002398.2_LINC01781  | 0.269677833 |
| AC002398.2_AC007128.1 | 0.648493576 |
| AC002398.2_AC099850.3 | 0.14257109  |
| AC002398.2_AC010655.2 | 0.118416382 |
| AC002398.2_LINC00941  | 0.269681298 |
| AC002398.2_MYOSLID    | 0.497871912 |
| AC002398.2_AL161772.1 | 0.529310516 |
| AC002398.2_AP005432.2 | 0.753543448 |
| AC002398.2_AC099066.2 | 0.567641465 |
| AC002398.2_CDKN2B-AS1 | 0.183987094 |
| AC002398.2_AL449423.1 | 0.78597945  |
| AC002398.2_AL445490.1 | 0.127779132 |
| AC002398.2_U62317.2   | 0.367784104 |
| AC002398.2_AC004988.1 | 0.019794017 |
| AC002398.2_LINC02195  | 0.048975702 |
| AC002398.2_AC090125.1 | 0.737878297 |
| AC002398.2_LINC01048  | 0.314654589 |
| AC002398.2_AC090673.1 | 0.84989208  |
| AC002398.2_AL356417.2 | 0.918075021 |
| AC002398.2_AC007750.1 | 0.119904525 |
| AC002398.2_LINC01561  | 0.588224127 |
| AC002398.2_LINC01833  | 0.03312568  |
| AC002398.2_LINC00460  | 0.238821139 |
| AC002398.2_LINC00536  | 0.388946844 |
| AC002398.2_AP000553.1 | 0.175284519 |
| AC002398.2_AATBC      | 0.125539218 |
| AC002398.2_AL161431.1 | 0.644678499 |
| AC002398.2_PICSA      | 0.188108509 |
| AC002398.2_LINC01615  | 0.371073068 |
| AC002398.2_LINC00641  | 0.003590573 |
| AC002398.2_MIR133A1HG | 0.617202727 |
| AC002398.2_AC104984.6 | 0.277695037 |
| AC002398.2_AL023755.1 | 0.564408192 |
| AC002398.2_AL359851.1 | 0.165155662 |
| AC002398.2_AC015923.1 | 0.26998138  |
| AC002398.2_AC005828.1 | 0.185818332 |
| AC002398.2_AC023034.1 | 0.71879255  |
| AC002398.2_AC099811.5 | 0.555012099 |
| AC002398.2_FP325330.3 | 0.129450759 |
| AC002398.2_AL355075.4 | 0.096277167 |
| AC002398.2_RMRP       | 0.591121417 |

---

---

|                        |             |
|------------------------|-------------|
| AC002398.2_AC037487.2  | 0.041638362 |
| AC002398.2_AC006141.1  | 0.305117895 |
| AC002398.2_LINC02443   | 0.392120655 |
| AC002398.2_MIR181A1HG  | 0.906232949 |
| AC002398.2_LINC02465   | 0.959100658 |
| AC002398.2_AC091906.1  | 0.392414043 |
| AL662860.1_AC079313.1  | 0.571808147 |
| AL662860.1_AC131097.4  | 0.307785097 |
| AL662860.1_AC092376.2  | 0.811440383 |
| AL662860.1_AC053503.4  | 0.383346517 |
| AL662860.1_AC027449.1  | 0.942017893 |
| AL662860.1_AP001189.1  | 0.964576645 |
| AL662860.1_AC005180.1  | 0.204892926 |
| AL662860.1_FENDRR      | 0.074492035 |
| AL662860.1_LINC02202   | 0.295276017 |
| AL662860.1_AP003071.4  | 0.37331442  |
| AL662860.1_AL365214.2  | 0.410936382 |
| AL662860.1_ADAMTS9-AS2 | 0.404717036 |
| AL662860.1_AP001107.5  | 0.396532307 |
| AL662860.1_AC087521.1  | 0.816131979 |
| AL662860.1_AC007671.1  | 0.378209979 |
| AL662860.1_LINC01081   | 0.927322936 |
| AL662860.1_HAND2-AS1   | 0.701428741 |
| AL662860.1_AC005180.2  | 0.918715214 |
| AL662860.1_LINC00702   | 0.086601526 |
| AL662860.1_MBNL1-AS1   | 0.035116812 |
| AL662860.1_LINC01614   | 0.093696727 |
| AL662860.1_MIR100HG    | 0.946732623 |
| AL662860.1_JAZF1-AS1   | 0.23487975  |
| AL662860.1_AC022893.1  | 0.459497933 |
| AL662860.1_ACTA2-AS1   | 0.052687528 |
| AL662860.1_AP003071.3  | 0.907495856 |
| AL662860.1_LINC01352   | 0.732456225 |
| AL662860.1_AC134312.1  | 0.668557394 |
| AL662860.1_AC091588.3  | 0.44927037  |
| AL662860.1_HLX-AS1     | 0.689301723 |
| AL662860.1_LINC00402   | 0.055934504 |
| AL662860.1_LINC01781   | 0.559014743 |
| AL662860.1_AC007128.1  | 0.929423187 |
| AL662860.1_AC099850.3  | 0.252496528 |
| AL662860.1_AC010655.2  | 0.35771531  |
| AL662860.1_LINC00941   | 0.634954584 |
| AL662860.1_MYOSLID     | 0.435539814 |
| AL662860.1_AL161772.1  | 0.576205751 |

---

---

|                       |             |
|-----------------------|-------------|
| AL662860.1_AP005432.2 | 0.159901515 |
| AL662860.1_AC099066.2 | 0.391949506 |
| AL662860.1_CDKN2B-AS1 | 0.057893939 |
| AL662860.1_AL449423.1 | 0.732818075 |
| AL662860.1_AL445490.1 | 0.251070321 |
| AL662860.1_AC004988.1 | 0.069052582 |
| AL662860.1_LINC02195  | 0.779618874 |
| AL662860.1_AC090125.1 | 0.894879312 |
| AL662860.1_LINC01048  | 0.839805999 |
| AL662860.1_AC090673.1 | 0.531298912 |
| AL662860.1_AL356417.2 | 0.67380993  |
| AL662860.1_AC007750.1 | 0.537466192 |
| AL662860.1_LINC01561  | 0.370575331 |
| AL662860.1_LINC01833  | 0.049398704 |
| AL662860.1_LINC00460  | 0.583116481 |
| AL662860.1_LINC00536  | 0.534645102 |
| AL662860.1_AP000553.1 | 0.211381717 |
| AL662860.1_AATBC      | 0.2389535   |
| AL662860.1_AL161431.1 | 0.306559893 |
| AL662860.1_PICSA      | 0.423591929 |
| AL662860.1_LINC01615  | 0.313161427 |
| AL662860.1_LINC00641  | 0.446484182 |
| AL662860.1_MIR133A1HG | 0.299032444 |
| AL662860.1_AC104984.6 | 0.086789475 |
| AL662860.1_AL023755.1 | 0.354392888 |
| AL662860.1_AL359851.1 | 0.443511684 |
| AL662860.1_AC015923.1 | 0.171606206 |
| AL662860.1_AC005828.1 | 0.381574906 |
| AL662860.1_AC023034.1 | 0.8125485   |
| AL662860.1_AC099811.5 | 0.652016538 |
| AL662860.1_FP325330.3 | 0.08012111  |
| AL662860.1_AL355075.4 | 0.236660644 |
| AL662860.1_RMRP       | 0.570360163 |
| AL662860.1_AC037487.2 | 0.82110052  |
| AL662860.1_AC006141.1 | 0.212299534 |
| AL662860.1_LINC02443  | 0.104650787 |
| AL662860.1_MIR181A1HG | 0.172183199 |
| AL662860.1_LINC02465  | 0.809837465 |
| AL662860.1_AC091906.1 | 0.5632545   |
| AC079313.1_AC131097.4 | 0.95796516  |
| AC079313.1_AC092376.2 | 0.783626601 |
| AC079313.1_AC053503.4 | 0.153079731 |
| AC079313.1_AC027449.1 | 0.238474918 |
| AC079313.1_AP001189.1 | 0.08569226  |

---

---

|                        |             |
|------------------------|-------------|
| AC079313.1_AC005180.1  | 0.573627244 |
| AC079313.1_FENDRR      | 0.557840209 |
| AC079313.1_LINC02202   | 0.533965226 |
| AC079313.1_AP003071.4  | 0.182374271 |
| AC079313.1_AL365214.2  | 0.885667439 |
| AC079313.1_ADAMTS9-AS2 | 0.87389792  |
| AC079313.1_AP001107.5  | 0.098688945 |
| AC079313.1_AC087521.1  | 0.002319309 |
| AC079313.1_AC007671.1  | 0.719228018 |
| AC079313.1_LINC01081   | 0.644773373 |
| AC079313.1_HAND2-AS1   | 0.620456159 |
| AC079313.1_AC005180.2  | 0.694719507 |
| AC079313.1_LINC00702   | 0.074080917 |
| AC079313.1_MBNL1-AS1   | 0.862391639 |
| AC079313.1_LINC01614   | 0.191032483 |
| AC079313.1_MIR100HG    | 0.25075032  |
| AC079313.1_JAZF1-AS1   | 0.666797463 |
| AC079313.1_AC022893.1  | 0.89789541  |
| AC079313.1_ACTA2-AS1   | 0.538708356 |
| AC079313.1_AP003071.3  | 0.023244385 |
| AC079313.1_LINC01352   | 0.220284906 |
| AC079313.1_AC134312.1  | 0.746034464 |
| AC079313.1_AC091588.3  | 0.185264651 |
| AC079313.1_HLX-AS1     | 0.461592608 |
| AC079313.1_LINC00402   | 0.855374924 |
| AC079313.1_LINC01781   | 0.695187199 |
| AC079313.1_AC007128.1  | 0.420204163 |
| AC079313.1_AC099850.3  | 0.423840304 |
| AC079313.1_AC010655.2  | 0.777491809 |
| AC079313.1_LINC00941   | 0.709438355 |
| AC079313.1_MYOSLID     | 0.306568711 |
| AC079313.1_AL161772.1  | 0.273774071 |
| AC079313.1_AP005432.2  | 0.099719095 |
| AC079313.1_AC099066.2  | 0.226820058 |
| AC079313.1_CDKN2B-AS1  | 0.920077285 |
| AC079313.1_AL449423.1  | 0.847866001 |
| AC079313.1_AL445490.1  | 0.642814393 |
| AC079313.1_AC004988.1  | 0.872973877 |
| AC079313.1_LINC02195   | 0.116120626 |
| AC079313.1_AC090125.1  | 0.791953273 |
| AC079313.1_LINC01048   | 0.225874192 |
| AC079313.1_AC090673.1  | 0.318966457 |
| AC079313.1_AL356417.2  | 0.160412505 |
| AC079313.1_AC007750.1  | 0.281455908 |

---



---

|                        |             |
|------------------------|-------------|
| AC079313.1_LINC01561   | 0.476993122 |
| AC079313.1_LINC01833   | 0.282183691 |
| AC079313.1_LINC00460   | 0.621019191 |
| AC079313.1_LINC00536   | 0.249793726 |
| AC079313.1_AP000553.1  | 0.724615502 |
| AC079313.1_AATBC       | 0.679415198 |
| AC079313.1_AL161431.1  | 0.022242395 |
| AC079313.1_PICSAR      | 0.720573796 |
| AC079313.1_LINC01615   | 0.027388326 |
| AC079313.1_LINC00641   | 0.421588317 |
| AC079313.1_MIR133A1HG  | 0.486395441 |
| AC079313.1_AC104984.6  | 0.798639076 |
| AC079313.1_AL023755.1  | 0.902106237 |
| AC079313.1_AL359851.1  | 0.506884359 |
| AC079313.1_AC015923.1  | 0.821554051 |
| AC079313.1_AC005828.1  | 0.655280053 |
| AC079313.1_AC023034.1  | 0.987380662 |
| AC079313.1_AC099811.5  | 0.271702758 |
| AC079313.1_FP325330.3  | 0.948540711 |
| AC079313.1_AL355075.4  | 0.853730648 |
| AC079313.1_RMRP        | 0.984444592 |
| AC079313.1_AC037487.2  | 0.975046352 |
| AC079313.1_AC006141.1  | 0.953551831 |
| AC079313.1_LINC02443   | 0.97186011  |
| AC079313.1_MIR181A1HG  | 0.607841613 |
| AC079313.1_LINC02465   | 0.500264641 |
| AC079313.1_AC091906.1  | 0.76445069  |
| AC131097.4_AC092376.2  | 0.904973214 |
| AC131097.4_AC053503.4  | 0.926795731 |
| AC131097.4_AC027449.1  | 0.807132391 |
| AC131097.4_AP001189.1  | 0.225937424 |
| AC131097.4_AC005180.1  | 0.371092869 |
| AC131097.4_FENDRR      | 0.790169121 |
| AC131097.4_LINC02202   | 0.162228848 |
| AC131097.4_AP003071.4  | 0.930199347 |
| AC131097.4_AL365214.2  | 0.948028954 |
| AC131097.4_ADAMTS9-AS2 | 0.954138715 |
| AC131097.4_AP001107.5  | 0.370522714 |
| AC131097.4_AC087521.1  | 0.108248475 |
| AC131097.4_AC007671.1  | 0.699423519 |
| AC131097.4_LINC01081   | 0.944726028 |
| AC131097.4_HAND2-AS1   | 0.30065805  |
| AC131097.4_AC005180.2  | 0.601935716 |
| AC131097.4_LINC00702   | 0.062593242 |

---

---

|                       |             |
|-----------------------|-------------|
| AC131097.4_MBNL1-AS1  | 0.181087018 |
| AC131097.4_LINC01614  | 0.961647309 |
| AC131097.4_MIR100HG   | 0.992300503 |
| AC131097.4_JAZF1-AS1  | 0.764115243 |
| AC131097.4_AC022893.1 | 0.370699798 |
| AC131097.4_ACTA2-AS1  | 0.872316104 |
| AC131097.4_AP003071.3 | 0.180566549 |
| AC131097.4_LINC01352  | 0.136496014 |
| AC131097.4_AC134312.1 | 0.869653409 |
| AC131097.4_AC091588.3 | 0.51290208  |
| AC131097.4_HLX-AS1    | 0.361114451 |
| AC131097.4_LINC00402  | 0.342033634 |
| AC131097.4_LINC01781  | 0.505413287 |
| AC131097.4_AC007128.1 | 0.072552707 |
| AC131097.4_AC010655.2 | 0.97398649  |
| AC131097.4_LINC00941  | 0.904317069 |
| AC131097.4_MYOSLID    | 0.737517045 |
| AC131097.4_AL161772.1 | 0.963104091 |
| AC131097.4_AP005432.2 | 0.428449927 |
| AC131097.4_AC099066.2 | 0.753682749 |
| AC131097.4_CDKN2B-AS1 | 0.753849994 |
| AC131097.4_AL449423.1 | 0.506499611 |
| AC131097.4_AL445490.1 | 0.852824385 |
| AC131097.4_AC004988.1 | 0.344012102 |
| AC131097.4_LINC02195  | 0.808748702 |
| AC131097.4_AC090125.1 | 0.328803424 |
| AC131097.4_LINC01048  | 0.269190277 |
| AC131097.4_AC090673.1 | 0.817624658 |
| AC131097.4_AL356417.2 | 0.531340719 |
| AC131097.4_AC007750.1 | 0.928471593 |
| AC131097.4_LINC01561  | 0.986151584 |
| AC131097.4_LINC01833  | 0.713402005 |
| AC131097.4_LINC00460  | 0.597409692 |
| AC131097.4_LINC00536  | 0.561408078 |
| AC131097.4_AP000553.1 | 0.782514258 |
| AC131097.4_AATBC      | 0.909377935 |
| AC131097.4_AL161431.1 | 0.247906112 |
| AC131097.4_PICSA      | 0.842393823 |
| AC131097.4_LINC01615  | 0.478749775 |
| AC131097.4_LINC00641  | 0.628183204 |
| AC131097.4_MIR133A1HG | 0.498523284 |
| AC131097.4_AC104984.6 | 0.518952205 |
| AC131097.4_AL023755.1 | 0.480102167 |
| AC131097.4_AL359851.1 | 0.675007599 |

---

---

|                        |             |
|------------------------|-------------|
| AC131097.4_AC015923.1  | 0.536880732 |
| AC131097.4_AC005828.1  | 0.627333681 |
| AC131097.4_AC023034.1  | 0.538315634 |
| AC131097.4_AC099811.5  | 0.923477252 |
| AC131097.4_FP325330.3  | 0.475561997 |
| AC131097.4_AL355075.4  | 0.683487479 |
| AC131097.4_RMRP        | 0.797320953 |
| AC131097.4_AC037487.2  | 0.836215858 |
| AC131097.4_AC006141.1  | 0.419349434 |
| AC131097.4_LINC02443   | 0.301258701 |
| AC131097.4_MIR181A1HG  | 0.730952273 |
| AC131097.4_LINC02465   | 0.753459712 |
| AC131097.4_AC091906.1  | 0.907365434 |
| AC092376.2_AC053503.4  | 0.038051344 |
| AC092376.2_AC027449.1  | 0.441352881 |
| AC092376.2_AP001189.1  | 0.226534907 |
| AC092376.2_AC005180.1  | 0.10626079  |
| AC092376.2_FENDRR      | 0.048815355 |
| AC092376.2_LINC02202   | 0.69053074  |
| AC092376.2_AP003071.4  | 0.728513702 |
| AC092376.2_AL365214.2  | 0.160210576 |
| AC092376.2_ADAMTS9-AS2 | 0.435286387 |
| AC092376.2_AP001107.5  | 0.057599454 |
| AC092376.2_AC087521.1  | 0.483003518 |
| AC092376.2_AC007671.1  | 0.691594997 |
| AC092376.2_LINC01081   | 0.870246675 |
| AC092376.2_HAND2-AS1   | 0.518270133 |
| AC092376.2_AC005180.2  | 0.750413325 |
| AC092376.2_LINC00702   | 0.013337431 |
| AC092376.2_MBNL1-AS1   | 0.952018416 |
| AC092376.2_LINC01614   | 0.010696189 |
| AC092376.2_MIR100HG    | 0.303716302 |
| AC092376.2_JAZF1-AS1   | 0.923157735 |
| AC092376.2_AC022893.1  | 0.883767148 |
| AC092376.2_ACTA2-AS1   | 0.910315616 |
| AC092376.2_AP003071.3  | 0.597869504 |
| AC092376.2_LINC01352   | 0.469375881 |
| AC092376.2_AC134312.1  | 0.850764801 |
| AC092376.2_AC091588.3  | 0.264293698 |
| AC092376.2_HLX-AS1     | 0.058514642 |
| AC092376.2_LINC00402   | 0.14066552  |
| AC092376.2_LINC01781   | 0.771114754 |
| AC092376.2_AC007128.1  | 0.754959868 |
| AC092376.2_AC099850.3  | 0.455563488 |

---

---

|                       |             |
|-----------------------|-------------|
| AC092376.2_AC010655.2 | 0.320064203 |
| AC092376.2_LINC00941  | 0.749000507 |
| AC092376.2_MYOSLID    | 0.769186521 |
| AC092376.2_AL161772.1 | 0.334114038 |
| AC092376.2_AP005432.2 | 0.12684622  |
| AC092376.2_AC099066.2 | 0.662094339 |
| AC092376.2_CDKN2B-AS1 | 0.342415066 |
| AC092376.2_AL449423.1 | 0.729909199 |
| AC092376.2_AL445490.1 | 0.575196441 |
| AC092376.2_AC004988.1 | 0.495498937 |
| AC092376.2_LINC02195  | 0.833532452 |
| AC092376.2_AC090125.1 | 0.271449174 |
| AC092376.2_LINC01048  | 0.878031798 |
| AC092376.2_AC090673.1 | 0.22570361  |
| AC092376.2_AL356417.2 | 0.415295216 |
| AC092376.2_AC007750.1 | 0.985115857 |
| AC092376.2_LINC01561  | 0.892453029 |
| AC092376.2_LINC01833  | 0.448571005 |
| AC092376.2_LINC00460  | 0.192769133 |
| AC092376.2_LINC00536  | 0.013033774 |
| AC092376.2_AP000553.1 | 0.854537355 |
| AC092376.2_AATBC      | 0.840074916 |
| AC092376.2_AL161431.1 | 0.01079213  |
| AC092376.2_PICSAR     | 0.284224285 |
| AC092376.2_LINC01615  | 0.056908792 |
| AC092376.2_LINC00641  | 0.87590619  |
| AC092376.2_MIR133A1HG | 0.974422483 |
| AC092376.2_AC104984.6 | 0.145086676 |
| AC092376.2_AL023755.1 | 0.132636697 |
| AC092376.2_AL359851.1 | 0.333712992 |
| AC092376.2_AC015923.1 | 0.002788356 |
| AC092376.2_AC005828.1 | 0.524800988 |
| AC092376.2_AC023034.1 | 0.617411194 |
| AC092376.2_AC099811.5 | 0.89895824  |
| AC092376.2_FP325330.3 | 0.035609894 |
| AC092376.2_AL355075.4 | 0.182654236 |
| AC092376.2_RMRP       | 0.435043779 |
| AC092376.2_AC037487.2 | 0.912423438 |
| AC092376.2_AC006141.1 | 0.1526914   |
| AC092376.2_LINC02443  | 0.043442294 |
| AC092376.2_MIR181A1HG | 0.435693682 |
| AC092376.2_LINC02465  | 0.261452256 |
| AC092376.2_AC091906.1 | 0.439589758 |
| AC053503.4_AC027449.1 | 0.033562638 |

---

---

|                        |             |
|------------------------|-------------|
| AC053503.4_AP001189.1  | 0.131050324 |
| AC053503.4_AC005180.1  | 0.167344468 |
| AC053503.4_FENDRR      | 0.06478271  |
| AC053503.4_LINC02202   | 0.028802921 |
| AC053503.4_AP003071.4  | 0.021746418 |
| AC053503.4_AL365214.2  | 0.024798539 |
| AC053503.4_ADAMTS9-AS2 | 0.036783831 |
| AC053503.4_AP001107.5  | 0.335677879 |
| AC053503.4_AC087521.1  | 0.094135658 |
| AC053503.4_AC007671.1  | 0.10563071  |
| AC053503.4_LINC01081   | 0.116287223 |
| AC053503.4_HAND2-AS1   | 0.056533042 |
| AC053503.4_AC005180.2  | 0.369277825 |
| AC053503.4_LINC00702   | 0.122369981 |
| AC053503.4_MBNL1-AS1   | 0.2970184   |
| AC053503.4_LINC01614   | 0.464482388 |
| AC053503.4_MIR100HG    | 0.795040953 |
| AC053503.4_JAZF1-AS1   | 0.062440494 |
| AC053503.4_AC022893.1  | 0.327130732 |
| AC053503.4_ACTA2-AS1   | 0.262977643 |
| AC053503.4_AP003071.3  | 0.02734237  |
| AC053503.4_LINC01352   | 0.02080177  |
| AC053503.4_AC134312.1  | 0.046594928 |
| AC053503.4_AC091588.3  | 0.036783831 |
| AC053503.4_HLX-AS1     | 0.056533778 |
| AC053503.4_LINC00402   | 0.031229738 |
| AC053503.4_LINC01781   | 0.028484497 |
| AC053503.4_AC007128.1  | 0.337494897 |
| AC053503.4_AC099850.3  | 0.422382946 |
| AC053503.4_AC010655.2  | 0.262385508 |
| AC053503.4_LINC00941   | 0.462623997 |
| AC053503.4_MYOSLID     | 0.528496632 |
| AC053503.4_AL161772.1  | 0.16453608  |
| AC053503.4_AP005432.2  | 0.319381856 |
| AC053503.4_AC099066.2  | 0.241457544 |
| AC053503.4_CDKN2B-AS1  | 0.01856066  |
| AC053503.4_AL449423.1  | 0.077458678 |
| AC053503.4_AL445490.1  | 0.119040208 |
| AC053503.4_U62317.2    | 0.359200184 |
| AC053503.4_AC004988.1  | 0.017057804 |
| AC053503.4_LINC02195   | 0.038845467 |
| AC053503.4_AC090125.1  | 0.07958997  |
| AC053503.4_LINC01048   | 0.041118493 |
| AC053503.4_AC090673.1  | 0.033794585 |

---

---

|                        |             |
|------------------------|-------------|
| AC053503.4_AL356417.2  | 0.089518584 |
| AC053503.4_AC007750.1  | 0.085297175 |
| AC053503.4_LINC01561   | 0.104753749 |
| AC053503.4_LINC01833   | 0.058630333 |
| AC053503.4_LINC00460   | 0.029887548 |
| AC053503.4_LINC00536   | 0.075527273 |
| AC053503.4_AP000553.1  | 0.03185524  |
| AC053503.4_AATBC       | 0.103652928 |
| AC053503.4_AL161431.1  | 0.159710112 |
| AC053503.4_PICSAR      | 0.021070691 |
| AC053503.4_LINC01615   | 0.39818183  |
| AC053503.4_LINC00641   | 0.684522217 |
| AC053503.4_MIR133A1HG  | 0.046941096 |
| AC053503.4_AC104984.6  | 0.046347334 |
| AC053503.4_AL023755.1  | 0.050358332 |
| AC053503.4_AL359851.1  | 0.03185524  |
| AC053503.4_AC015923.1  | 0.007450892 |
| AC053503.4_AC005828.1  | 0.021283143 |
| AC053503.4_AC023034.1  | 0.090279109 |
| AC053503.4_AC099811.5  | 0.048361052 |
| AC053503.4_FP325330.3  | 0.036717397 |
| AC053503.4_AL355075.4  | 0.217734804 |
| AC053503.4_RMRP        | 0.031720807 |
| AC053503.4_AC037487.2  | 0.039227272 |
| AC053503.4_AC006141.1  | 0.046941096 |
| AC053503.4_LINC02443   | 0.070645069 |
| AC053503.4_MIR181A1HG  | 0.03185524  |
| AC053503.4_LINC02465   | 0.028494321 |
| AC053503.4_AC091906.1  | 0.068046385 |
| AC027449.1_AP001189.1  | 0.969359855 |
| AC027449.1_AC005180.1  | 0.541512642 |
| AC027449.1_FENDRR      | 0.213253427 |
| AC027449.1_LINC02202   | 0.157158749 |
| AC027449.1_AP003071.4  | 0.690929574 |
| AC027449.1_AL365214.2  | 0.643244524 |
| AC027449.1_ADAMTS9-AS2 | 0.786345002 |
| AC027449.1_AP001107.5  | 0.847706756 |
| AC027449.1_AC087521.1  | 0.270611731 |
| AC027449.1_AC007671.1  | 0.781636607 |
| AC027449.1_LINC01081   | 0.907452947 |
| AC027449.1_HAND2-AS1   | 0.888707291 |
| AC027449.1_AC005180.2  | 0.027167439 |
| AC027449.1_LINC00702   | 0.834589963 |
| AC027449.1_MBNL1-AS1   | 0.0033679   |

---

---

|                       |             |
|-----------------------|-------------|
| AC027449.1_LINC01614  | 0.567565169 |
| AC027449.1_MIR100HG   | 0.345596356 |
| AC027449.1_JAZF1-AS1  | 0.501419079 |
| AC027449.1_AC022893.1 | 0.440931517 |
| AC027449.1_ACTA2-AS1  | 0.030065783 |
| AC027449.1_AP003071.3 | 0.500833474 |
| AC027449.1_LINC01352  | 0.680072888 |
| AC027449.1_AC134312.1 | 0.975664791 |
| AC027449.1_AC091588.3 | 0.359987301 |
| AC027449.1_HLX-AS1    | 0.969251771 |
| AC027449.1_LINC00402  | 0.434534288 |
| AC027449.1_LINC01781  | 0.269941674 |
| AC027449.1_AC007128.1 | 0.351195321 |
| AC027449.1_AC099850.3 | 0.252496528 |
| AC027449.1_AC010655.2 | 0.572090649 |
| AC027449.1_LINC00941  | 0.805916037 |
| AC027449.1_MYOSLID    | 0.876130975 |
| AC027449.1_AL161772.1 | 0.745710476 |
| AC027449.1_AP005432.2 | 0.170622536 |
| AC027449.1_AC099066.2 | 0.768244527 |
| AC027449.1_CDKN2B-AS1 | 0.244845656 |
| AC027449.1_AL449423.1 | 0.681442601 |
| AC027449.1_AL445490.1 | 0.847634744 |
| AC027449.1_AC004988.1 | 0.109980578 |
| AC027449.1_LINC02195  | 0.936336363 |
| AC027449.1_AC090125.1 | 0.697756458 |
| AC027449.1_LINC01048  | 0.732408462 |
| AC027449.1_AC090673.1 | 0.455672122 |
| AC027449.1_AL356417.2 | 0.795212019 |
| AC027449.1_AC007750.1 | 0.230339186 |
| AC027449.1_LINC01561  | 0.179186361 |
| AC027449.1_LINC01833  | 0.699722077 |
| AC027449.1_LINC00460  | 0.871307784 |
| AC027449.1_LINC00536  | 0.831940662 |
| AC027449.1_AP000553.1 | 0.514449325 |
| AC027449.1_AATBC      | 0.554468717 |
| AC027449.1_AL161431.1 | 0.613180583 |
| AC027449.1_PICSA      | 0.608731994 |
| AC027449.1_LINC01615  | 0.40137923  |
| AC027449.1_LINC00641  | 0.004055522 |
| AC027449.1_MIR133A1HG | 0.696644505 |
| AC027449.1_AC104984.6 | 0.712101249 |
| AC027449.1_AL023755.1 | 0.807256044 |
| AC027449.1_AL359851.1 | 0.632664453 |

---

---

|                        |             |
|------------------------|-------------|
| AC027449.1_AC015923.1  | 0.517922611 |
| AC027449.1_AC005828.1  | 0.389488048 |
| AC027449.1_AC023034.1  | 0.472401361 |
| AC027449.1_AC099811.5  | 0.889003489 |
| AC027449.1_FP325330.3  | 0.361547229 |
| AC027449.1_AL355075.4  | 0.299926111 |
| AC027449.1_RMRP        | 0.852591304 |
| AC027449.1_AC037487.2  | 0.263687222 |
| AC027449.1_AC006141.1  | 0.617990489 |
| AC027449.1_LINC02443   | 0.401354349 |
| AC027449.1_MIR181A1HG  | 0.577008606 |
| AC027449.1_LINC02465   | 0.600463598 |
| AC027449.1_AC091906.1  | 0.472612817 |
| AP001189.1_AC005180.1  | 0.851670053 |
| AP001189.1_FENDRR      | 0.000631882 |
| AP001189.1_LINC02202   | 0.050866447 |
| AP001189.1_AP003071.4  | 0.036773771 |
| AP001189.1_AL365214.2  | 0.107703899 |
| AP001189.1_ADAMTS9-AS2 | 0.519859826 |
| AP001189.1_AP001107.5  | 0.567936186 |
| AP001189.1_AC087521.1  | 0.133196445 |
| AP001189.1_AC007671.1  | 0.22125544  |
| AP001189.1_LINC01081   | 0.418296766 |
| AP001189.1_HAND2-AS1   | 0.686680367 |
| AP001189.1_AC005180.2  | 0.021696711 |
| AP001189.1_LINC00702   | 0.799078088 |
| AP001189.1_MBNL1-AS1   | 0.160587205 |
| AP001189.1_LINC01614   | 0.302662001 |
| AP001189.1_MIR100HG    | 0.94893032  |
| AP001189.1_JAZF1-AS1   | 0.215184778 |
| AP001189.1_AC022893.1  | 0.095175932 |
| AP001189.1_ACTA2-AS1   | 0.001936308 |
| AP001189.1_AP003071.3  | 0.945197562 |
| AP001189.1_LINC01352   | 0.851836834 |
| AP001189.1_AC134312.1  | 0.179709069 |
| AP001189.1_AC091588.3  | 0.038742935 |
| AP001189.1_HLX-AS1     | 0.490301888 |
| AP001189.1_LINC00402   | 0.12811287  |
| AP001189.1_LINC01781   | 0.1133463   |
| AP001189.1_AC007128.1  | 0.836675686 |
| AP001189.1_AC099850.3  | 0.644717504 |
| AP001189.1_AC010655.2  | 0.113354086 |
| AP001189.1_LINC00941   | 0.298278683 |
| AP001189.1_MYOSLID     | 0.399311883 |

---



---

|                       |             |
|-----------------------|-------------|
| AP001189.1_AL161772.1 | 0.343329608 |
| AP001189.1_AP005432.2 | 0.040852505 |
| AP001189.1_AC099066.2 | 0.820811036 |
| AP001189.1_CDKN2B-AS1 | 0.156484617 |
| AP001189.1_AL449423.1 | 0.266464323 |
| AP001189.1_AL445490.1 | 0.091326021 |
| AP001189.1_AC004988.1 | 0.034067213 |
| AP001189.1_LINC02195  | 0.103363356 |
| AP001189.1_AC090125.1 | 0.846178034 |
| AP001189.1_LINC01048  | 0.69550371  |
| AP001189.1_AC090673.1 | 0.375214336 |
| AP001189.1_AL356417.2 | 0.88465714  |
| AP001189.1_AC007750.1 | 0.368393042 |
| AP001189.1_LINC01561  | 0.366936915 |
| AP001189.1_LINC01833  | 0.091899494 |
| AP001189.1_LINC00460  | 0.981438025 |
| AP001189.1_LINC00536  | 0.923610935 |
| AP001189.1_AP000553.1 | 0.255361296 |
| AP001189.1_AATBC      | 0.06224941  |
| AP001189.1_AL161431.1 | 0.127030619 |
| AP001189.1_PICSAR     | 0.01227403  |
| AP001189.1_LINC01615  | 0.787719302 |
| AP001189.1_LINC00641  | 0.983203483 |
| AP001189.1_MIR133A1HG | 0.16463405  |
| AP001189.1_AC104984.6 | 0.030166416 |
| AP001189.1_AL023755.1 | 0.000536995 |
| AP001189.1_AL359851.1 | 0.086027872 |
| AP001189.1_AC015923.1 | 0.000318328 |
| AP001189.1_AC005828.1 | 0.021701792 |
| AP001189.1_AC023034.1 | 0.07221574  |
| AP001189.1_AC099811.5 | 0.120390424 |
| AP001189.1_FP325330.3 | 0.004273688 |
| AP001189.1_AL355075.4 | 0.06058411  |
| AP001189.1_RMRP       | 0.455525087 |
| AP001189.1_AC037487.2 | 0.177105897 |
| AP001189.1_AC006141.1 | 0.101055919 |
| AP001189.1_LINC02443  | 0.016756909 |
| AP001189.1_MIR181A1HG | 0.249465222 |
| AP001189.1_LINC02465  | 0.28628842  |
| AP001189.1_AC091906.1 | 0.219848763 |
| AC005180.1_FENDRR     | 0.029272498 |
| AC005180.1_LINC02202  | 0.497968564 |
| AC005180.1_AP003071.4 | 0.288583439 |
| AC005180.1_AL365214.2 | 0.135157964 |

---

---

|                        |             |
|------------------------|-------------|
| AC005180.1_ADAMTS9-AS2 | 0.340659364 |
| AC005180.1_AP001107.5  | 0.96995151  |
| AC005180.1_AC087521.1  | 0.708213173 |
| AC005180.1_AC007671.1  | 0.307671818 |
| AC005180.1_LINC01081   | 0.294258679 |
| AC005180.1_HAND2-AS1   | 0.497286744 |
| AC005180.1_AC005180.2  | 0.140991472 |
| AC005180.1_LINC00702   | 0.960817019 |
| AC005180.1_MBNL1-AS1   | 0.676113599 |
| AC005180.1_LINC01614   | 0.430553198 |
| AC005180.1_MIR100HG    | 0.760850405 |
| AC005180.1_JAZF1-AS1   | 0.129175098 |
| AC005180.1_AC022893.1  | 0.491121249 |
| AC005180.1_ACTA2-AS1   | 0.094730671 |
| AC005180.1_AP003071.3  | 0.901003289 |
| AC005180.1_LINC01352   | 0.201814014 |
| AC005180.1_AC134312.1  | 0.216052157 |
| AC005180.1_AC091588.3  | 0.103192315 |
| AC005180.1_HLX-AS1     | 0.436601898 |
| AC005180.1_LINC00402   | 0.242257577 |
| AC005180.1_LINC01781   | 0.621444055 |
| AC005180.1_AC007128.1  | 0.10535408  |
| AC005180.1_AC099850.3  | 0.522742125 |
| AC005180.1_AC010655.2  | 0.479133762 |
| AC005180.1_LINC00941   | 0.737502721 |
| AC005180.1_MYOSLID     | 0.878116044 |
| AC005180.1_AL161772.1  | 0.438216945 |
| AC005180.1_AP005432.2  | 0.168835456 |
| AC005180.1_AC099066.2  | 0.94386231  |
| AC005180.1_CDKN2B-AS1  | 0.257151029 |
| AC005180.1_AL449423.1  | 0.825120695 |
| AC005180.1_AL445490.1  | 0.296408608 |
| AC005180.1_U62317.2    | 0.580688581 |
| AC005180.1_AC004988.1  | 0.039866378 |
| AC005180.1_LINC02195   | 0.021387026 |
| AC005180.1_AC090125.1  | 0.499880289 |
| AC005180.1_LINC01048   | 0.417874479 |
| AC005180.1_AC090673.1  | 0.494876654 |
| AC005180.1_AL356417.2  | 0.146380002 |
| AC005180.1_AC007750.1  | 0.67169056  |
| AC005180.1_LINC01561   | 0.577413269 |
| AC005180.1_LINC01833   | 0.020274411 |
| AC005180.1_LINC00460   | 0.969688109 |
| AC005180.1_LINC00536   | 0.606454208 |

---

---

|                       |             |
|-----------------------|-------------|
| AC005180.1_AP000553.1 | 0.271759922 |
| AC005180.1_AATBC      | 0.520656244 |
| AC005180.1_AL161431.1 | 0.432114644 |
| AC005180.1_PICSAR     | 0.072699757 |
| AC005180.1_LINC01615  | 0.579456744 |
| AC005180.1_LINC00641  | 0.085522869 |
| AC005180.1_MIR133A1HG | 0.065497753 |
| AC005180.1_AC104984.6 | 0.345994756 |
| AC005180.1_AL023755.1 | 0.023254183 |
| AC005180.1_AL359851.1 | 0.09759399  |
| AC005180.1_AC015923.1 | 0.084220557 |
| AC005180.1_AC005828.1 | 0.028582527 |
| AC005180.1_AC023034.1 | 0.124645207 |
| AC005180.1_AC099811.5 | 0.086544183 |
| AC005180.1_FP325330.3 | 0.020508315 |
| AC005180.1_AL355075.4 | 0.385539255 |
| AC005180.1_RMRP       | 0.199582629 |
| AC005180.1_AC037487.2 | 0.282124626 |
| AC005180.1_AC006141.1 | 0.072960601 |
| AC005180.1_LINC02443  | 0.043141112 |
| AC005180.1_MIR181A1HG | 0.216400394 |
| AC005180.1_LINC02465  | 0.185837817 |
| AC005180.1_AC091906.1 | 0.453331735 |
| FENDRR_LINC02202      | 0.012671088 |
| FENDRR_AP003071.4     | 0.40587425  |
| FENDRR_AL365214.2     | 0.861164789 |
| FENDRR_ADAMTS9-AS2    | 3.39E-05    |
| FENDRR_AP001107.5     | 0.018534026 |
| FENDRR_AC087521.1     | 0.010250782 |
| FENDRR_AC007671.1     | 0.005850909 |
| FENDRR_LINC01081      | 2.73E-05    |
| FENDRR_HAND2-AS1      | 0.136183873 |
| FENDRR_AC005180.2     | 0.197037144 |
| FENDRR_LINC00702      | 0.411397725 |
| FENDRR_MBNL1-AS1      | 0.762712448 |
| FENDRR_LINC01614      | 0.048089044 |
| FENDRR_MIR100HG       | 0.02868353  |
| FENDRR_JAZF1-AS1      | 0.000896037 |
| FENDRR_AC022893.1     | 0.667185217 |
| FENDRR_ACTA2-AS1      | 0.613671748 |
| FENDRR_AP003071.3     | 0.000184962 |
| FENDRR_LINC01352      | 0.030153523 |
| FENDRR_AC134312.1     | 0.004036641 |
| FENDRR_AC091588.3     | 0.00050388  |

---

---

|                   |             |
|-------------------|-------------|
| FENDRR_HLX-AS1    | 0.445200574 |
| FENDRR_LINC00402  | 7.20E-05    |
| FENDRR_LINC01781  | 0.274515594 |
| FENDRR_AC007128.1 | 0.884431713 |
| FENDRR_AC099850.3 | 0.96667354  |
| FENDRR_AC010655.2 | 0.409426866 |
| FENDRR_LINC00941  | 0.869310824 |
| FENDRR_MYOSLID    | 0.057190105 |
| FENDRR_AL161772.1 | 0.687625692 |
| FENDRR_AP005432.2 | 0.889097257 |
| FENDRR_AC099066.2 | 0.109503915 |
| FENDRR_CDKN2B-AS1 | 0.892978067 |
| FENDRR_AL449423.1 | 0.230472739 |
| FENDRR_AL445490.1 | 0.504166627 |
| FENDRR_U62317.2   | 0.179228514 |
| FENDRR_AC004988.1 | 0.807593242 |
| FENDRR_LINC02195  | 0.108690552 |
| FENDRR_AC090125.1 | 0.607466548 |
| FENDRR_LINC01048  | 0.032488947 |
| FENDRR_AC090673.1 | 0.175773701 |
| FENDRR_AL356417.2 | 0.805677917 |
| FENDRR_AC007750.1 | 0.403360804 |
| FENDRR_LINC01561  | 0.374027592 |
| FENDRR_LINC01833  | 0.152169497 |
| FENDRR_LINC00460  | 0.220332652 |
| FENDRR_LINC00536  | 1.01E-06    |
| FENDRR_AP000553.1 | 0.285680776 |
| FENDRR_AATBC      | 0.019889822 |
| FENDRR_AL161431.1 | 0.186859163 |
| FENDRR_PICAR      | 0.907138608 |
| FENDRR_LINC01615  | 0.449930849 |
| FENDRR_LINC00641  | 0.577956043 |
| FENDRR_MIR133A1HG | 0.590459737 |
| FENDRR_AC104984.6 | 0.357929328 |
| FENDRR_AL023755.1 | 0.873004321 |
| FENDRR_AL359851.1 | 0.530134944 |
| FENDRR_AC015923.1 | 0.504257847 |
| FENDRR_AC005828.1 | 0.851040808 |
| FENDRR_AC023034.1 | 0.907724744 |
| FENDRR_AC099811.5 | 0.374458363 |
| FENDRR_FP325330.3 | 0.718569481 |
| FENDRR_AL355075.4 | 0.727533842 |
| FENDRR_RMRP       | 0.515013081 |
| FENDRR_AC037487.2 | 0.839103977 |

---

---

|                       |              |
|-----------------------|--------------|
| FENDRR_AC006141. 1    | 0. 358348474 |
| FENDRR_LINC02443      | 0. 801071329 |
| FENDRR_MIR181A1HG     | 0. 431689074 |
| FENDRR_LINC02465      | 0. 46777787  |
| FENDRR_AC091906. 1    | 0. 527059979 |
| LINC02202_AP003071. 4 | 0. 747012903 |
| LINC02202_AL365214. 2 | 0. 436467008 |
| LINC02202_ADAMTS9-AS2 | 0. 733975091 |
| LINC02202_AP001107. 5 | 0. 350868755 |
| LINC02202_AC087521. 1 | 0. 05266201  |
| LINC02202_AC007671. 1 | 0. 25730576  |
| LINC02202_LINC01081   | 0. 91230324  |
| LINC02202_HAND2-AS1   | 0. 310883673 |
| LINC02202_AC005180. 2 | 0. 215354856 |
| LINC02202_LINC00702   | 0. 112153849 |
| LINC02202_MBNL1-AS1   | 0. 352100278 |
| LINC02202_LINC01614   | 0. 066291057 |
| LINC02202_MIR100HG    | 0. 295462304 |
| LINC02202_JAZF1-AS1   | 0. 953988017 |
| LINC02202_AC022893. 1 | 0. 95581014  |
| LINC02202_ACTA2-AS1   | 0. 104013974 |
| LINC02202_AP003071. 3 | 0. 468576148 |
| LINC02202_LINC01352   | 0. 383992445 |
| LINC02202_AC134312. 1 | 0. 055373943 |
| LINC02202_AC091588. 3 | 0. 934036304 |
| LINC02202_HLX-AS1     | 0. 03186106  |
| LINC02202_LINC00402   | 0. 945730965 |
| LINC02202_LINC01781   | 0. 476415539 |
| LINC02202_AC007128. 1 | 0. 51726612  |
| LINC02202_AC099850. 3 | 0. 906830357 |
| LINC02202_AC010655. 2 | 0. 438441136 |
| LINC02202_LINC00941   | 0. 367407985 |
| LINC02202_MYOSLID     | 0. 566148641 |
| LINC02202_AL161772. 1 | 0. 768379194 |
| LINC02202_AP005432. 2 | 0. 068151804 |
| LINC02202_AC099066. 2 | 0. 538486349 |
| LINC02202_CDKN2B-AS1  | 0. 385689036 |
| LINC02202_AL449423. 1 | 0. 376933989 |
| LINC02202_AL445490. 1 | 0. 576924226 |
| LINC02202_AC004988. 1 | 0. 569488837 |
| LINC02202_LINC02195   | 0. 927429274 |
| LINC02202_AC090125. 1 | 0. 856254179 |
| LINC02202_LINC01048   | 0. 265521003 |
| LINC02202_AC090673. 1 | 0. 049377404 |

---

---

|                         |              |
|-------------------------|--------------|
| LINC02202_AL356417. 2   | 0. 147693366 |
| LINC02202_AC007750. 1   | 0. 484643662 |
| LINC02202_LINC01561     | 0. 716097865 |
| LINC02202_LINC01833     | 0. 469580731 |
| LINC02202_LINC00460     | 0. 088135562 |
| LINC02202_LINC00536     | 0. 001590365 |
| LINC02202_AP000553. 1   | 0. 718296865 |
| LINC02202_AATBC         | 0. 217709327 |
| LINC02202_AL161431. 1   | 0. 024882407 |
| LINC02202_PICSAR        | 0. 883909363 |
| LINC02202_LINC01615     | 0. 075341886 |
| LINC02202_LINC00641     | 0. 682683364 |
| LINC02202_MIR133A1HG    | 0. 666809743 |
| LINC02202_AC104984. 6   | 0. 482344785 |
| LINC02202_AL023755. 1   | 0. 213788512 |
| LINC02202_AL359851. 1   | 0. 468264546 |
| LINC02202_AC015923. 1   | 0. 239403725 |
| LINC02202_AC005828. 1   | 0. 269874447 |
| LINC02202_AC023034. 1   | 0. 849310251 |
| LINC02202_AC099811. 5   | 0. 663615699 |
| LINC02202_FP325330. 3   | 0. 074518069 |
| LINC02202_AL355075. 4   | 0. 99267725  |
| LINC02202_RMRP          | 0. 152004967 |
| LINC02202_AC037487. 2   | 0. 658254612 |
| LINC02202_AC006141. 1   | 0. 483724505 |
| LINC02202_LINC02443     | 0. 759704957 |
| LINC02202_MIR181A1HG    | 0. 061707089 |
| LINC02202_LINC02465     | 0. 787604746 |
| LINC02202_AC091906. 1   | 0. 322105239 |
| AP003071. 4_AL365214. 2 | 0. 632769045 |
| AP003071. 4_ADAMTS9-AS2 | 0. 525053456 |
| AP003071. 4_AP001107. 5 | 0. 476209068 |
| AP003071. 4_AC087521. 1 | 0. 654394467 |
| AP003071. 4_AC007671. 1 | 0. 281469952 |
| AP003071. 4_LINC01081   | 0. 809651984 |
| AP003071. 4_HAND2-AS1   | 0. 680540265 |
| AP003071. 4_AC005180. 2 | 0. 580220312 |
| AP003071. 4_LINC00702   | 0. 346097114 |
| AP003071. 4_MBNL1-AS1   | 0. 518190335 |
| AP003071. 4_LINC01614   | 0. 177046998 |
| AP003071. 4_MIR100HG    | 0. 15884277  |
| AP003071. 4_JAZF1-AS1   | 0. 605834372 |
| AP003071. 4_AC022893. 1 | 0. 212239895 |
| AP003071. 4_ACTA2-AS1   | 0. 529447922 |

---

---

|                       |             |
|-----------------------|-------------|
| AP003071.4_AP003071.3 | 0.604903333 |
| AP003071.4_LINC01352  | 0.640134849 |
| AP003071.4_AC134312.1 | 0.936590205 |
| AP003071.4_AC091588.3 | 0.56426     |
| AP003071.4_HLX-AS1    | 0.873831601 |
| AP003071.4_LINC00402  | 0.65175286  |
| AP003071.4_LINC01781  | 0.842968753 |
| AP003071.4_AC007128.1 | 0.181148236 |
| AP003071.4_AC099850.3 | 0.287260412 |
| AP003071.4_AC010655.2 | 0.218287538 |
| AP003071.4_LINC00941  | 0.809732923 |
| AP003071.4_MYOSLID    | 0.816535203 |
| AP003071.4_AL161772.1 | 0.562090097 |
| AP003071.4_AP005432.2 | 0.214703867 |
| AP003071.4_AC099066.2 | 0.497182033 |
| AP003071.4_CDKN2B-AS1 | 0.0677543   |
| AP003071.4_AL449423.1 | 0.404542886 |
| AP003071.4_AL445490.1 | 0.390034599 |
| AP003071.4_U62317.2   | 0.654244003 |
| AP003071.4_AC004988.1 | 0.330701413 |
| AP003071.4_LINC02195  | 0.001140007 |
| AP003071.4_AC090125.1 | 0.705990342 |
| AP003071.4_LINC01048  | 0.178454119 |
| AP003071.4_AC090673.1 | 0.801361758 |
| AP003071.4_AL356417.2 | 0.368745029 |
| AP003071.4_AC007750.1 | 0.490595552 |
| AP003071.4_LINC01561  | 0.625859425 |
| AP003071.4_LINC01833  | 0.433129766 |
| AP003071.4_LINC00460  | 0.200448155 |
| AP003071.4_LINC00536  | 0.027281411 |
| AP003071.4_AP000553.1 | 0.968290623 |
| AP003071.4_AATBC      | 0.1750806   |
| AP003071.4_AL161431.1 | 0.173027778 |
| AP003071.4_PICSA      | 0.739979701 |
| AP003071.4_LINC01615  | 0.358817065 |
| AP003071.4_LINC00641  | 0.171618996 |
| AP003071.4_MIR133A1HG | 0.724474223 |
| AP003071.4_AC104984.6 | 0.579431624 |
| AP003071.4_AL023755.1 | 0.339020498 |
| AP003071.4_AL359851.1 | 0.653611451 |
| AP003071.4_AC015923.1 | 0.622095207 |
| AP003071.4_AC005828.1 | 0.314839508 |
| AP003071.4_AC023034.1 | 0.429710728 |
| AP003071.4_AC099811.5 | 0.520646522 |

---

---

|                        |             |
|------------------------|-------------|
| AP003071.4_FP325330.3  | 0.415937052 |
| AP003071.4_AL355075.4  | 0.518648884 |
| AP003071.4_RMRP        | 0.624066146 |
| AP003071.4_AC037487.2  | 0.841598041 |
| AP003071.4_AC006141.1  | 0.986840353 |
| AP003071.4_LINC02443   | 0.108780576 |
| AP003071.4_MIR181A1HG  | 0.62640617  |
| AP003071.4_LINC02465   | 0.537908702 |
| AP003071.4_AC091906.1  | 0.170649341 |
| AL365214.2_ADAMTS9-AS2 | 0.010502468 |
| AL365214.2_AP001107.5  | 0.220937224 |
| AL365214.2_AC087521.1  | 0.812048215 |
| AL365214.2_AC007671.1  | 0.256302924 |
| AL365214.2_LINC01081   | 0.762716565 |
| AL365214.2_HAND2-AS1   | 0.439871736 |
| AL365214.2_AC005180.2  | 0.318570228 |
| AL365214.2_LINC00702   | 0.029646164 |
| AL365214.2_MBNL1-AS1   | 0.796217503 |
| AL365214.2_LINC01614   | 0.01458588  |
| AL365214.2_MIR100HG    | 0.196026208 |
| AL365214.2_JAZF1-AS1   | 0.7340583   |
| AL365214.2_AC022893.1  | 0.715553839 |
| AL365214.2_ACTA2-AS1   | 0.337416201 |
| AL365214.2_AP003071.3  | 0.337039149 |
| AL365214.2_LINC01352   | 0.033728758 |
| AL365214.2_AC134312.1  | 0.691687736 |
| AL365214.2_AC091588.3  | 0.192634789 |
| AL365214.2_HLX-AS1     | 0.241790264 |
| AL365214.2_LINC00402   | 0.236134819 |
| AL365214.2_LINC01781   | 0.721605693 |
| AL365214.2_AC007128.1  | 0.866583137 |
| AL365214.2_AC099850.3  | 0.455563488 |
| AL365214.2_AC010655.2  | 0.897492231 |
| AL365214.2_LINC00941   | 0.199785658 |
| AL365214.2_MYOSLID     | 0.544118695 |
| AL365214.2_AL161772.1  | 0.322482152 |
| AL365214.2_AP005432.2  | 0.015323956 |
| AL365214.2_AC099066.2  | 0.914362547 |
| AL365214.2_CDKN2B-AS1  | 0.321194886 |
| AL365214.2_AL449423.1  | 0.851701597 |
| AL365214.2_AL445490.1  | 0.919513895 |
| AL365214.2_AC004988.1  | 0.787523676 |
| AL365214.2_LINC02195   | 0.708168141 |
| AL365214.2_AC090125.1  | 0.81376453  |

---



---

|                        |             |
|------------------------|-------------|
| AL365214.2_LINC01048   | 0.416105397 |
| AL365214.2_AC090673.1  | 0.10679925  |
| AL365214.2_AL356417.2  | 0.238252491 |
| AL365214.2_AC007750.1  | 0.856733732 |
| AL365214.2_LINC01561   | 0.288226375 |
| AL365214.2_LINC01833   | 0.431872721 |
| AL365214.2_LINC00460   | 0.420600745 |
| AL365214.2_LINC00536   | 0.218632265 |
| AL365214.2_AP000553.1  | 0.546382236 |
| AL365214.2_AATBC       | 0.67205468  |
| AL365214.2_AL161431.1  | 0.090432287 |
| AL365214.2_PICSA       | 0.572085928 |
| AL365214.2_LINC01615   | 0.999714547 |
| AL365214.2_MIR133A1HG  | 0.660602377 |
| AL365214.2_AC104984.6  | 0.374075015 |
| AL365214.2_AL023755.1  | 0.232796333 |
| AL365214.2_AL359851.1  | 0.321704564 |
| AL365214.2_AC015923.1  | 0.273976536 |
| AL365214.2_AC005828.1  | 0.757333014 |
| AL365214.2_AC023034.1  | 0.750921315 |
| AL365214.2_AC099811.5  | 0.711499084 |
| AL365214.2_FP325330.3  | 0.982594949 |
| AL365214.2_AL355075.4  | 0.294143975 |
| AL365214.2_RMRP        | 0.442553803 |
| AL365214.2_AC037487.2  | 0.651481689 |
| AL365214.2_AC006141.1  | 0.786152289 |
| AL365214.2_LINC02443   | 0.435052657 |
| AL365214.2_MIR181A1HG  | 0.999769781 |
| AL365214.2_LINC02465   | 0.871323098 |
| AL365214.2_AC091906.1  | 0.967694956 |
| ADAMTS9-AS2_AP001107.5 | 0.365526802 |
| ADAMTS9-AS2_AC087521.1 | 0.583084998 |
| ADAMTS9-AS2_AC007671.1 | 0.767490057 |
| ADAMTS9-AS2_LINC01081  | 0.958373351 |
| ADAMTS9-AS2_HAND2-AS1  | 0.325133134 |
| ADAMTS9-AS2_AC005180.2 | 0.09381287  |
| ADAMTS9-AS2_LINC00702  | 0.947207267 |
| ADAMTS9-AS2_MBNL1-AS1  | 0.598319018 |
| ADAMTS9-AS2_LINC01614  | 0.090082681 |
| ADAMTS9-AS2_MIR100HG   | 0.664434957 |
| ADAMTS9-AS2_JAZF1-AS1  | 0.466060399 |
| ADAMTS9-AS2_AC022893.1 | 0.042916227 |
| ADAMTS9-AS2_ACTA2-AS1  | 0.37497638  |
| ADAMTS9-AS2_AP003071.3 | 0.423351593 |

---

---

|                        |             |
|------------------------|-------------|
| ADAMTS9-AS2_LINC01352  | 0.63021347  |
| ADAMTS9-AS2_AC134312.1 | 0.948162458 |
| ADAMTS9-AS2_AC091588.3 | 0.808178995 |
| ADAMTS9-AS2_HLX-AS1    | 0.69283778  |
| ADAMTS9-AS2_LINC00402  | 0.034997027 |
| ADAMTS9-AS2_LINC01781  | 0.39664473  |
| ADAMTS9-AS2_AC007128.1 | 0.633165528 |
| ADAMTS9-AS2_AC099850.3 | 0.455563488 |
| ADAMTS9-AS2_AC010655.2 | 0.646435378 |
| ADAMTS9-AS2_LINC00941  | 0.580626262 |
| ADAMTS9-AS2_MYOSLID    | 0.325097457 |
| ADAMTS9-AS2_AL161772.1 | 0.010622551 |
| ADAMTS9-AS2_AP005432.2 | 0.01407251  |
| ADAMTS9-AS2_AC099066.2 | 0.935107054 |
| ADAMTS9-AS2_CDKN2B-AS1 | 0.019092721 |
| ADAMTS9-AS2_AL449423.1 | 0.798189403 |
| ADAMTS9-AS2_AL445490.1 | 0.232323907 |
| ADAMTS9-AS2_AC004988.1 | 0.797684414 |
| ADAMTS9-AS2_LINC02195  | 0.887470266 |
| ADAMTS9-AS2_AC090125.1 | 0.828504318 |
| ADAMTS9-AS2_LINC01048  | 0.630254559 |
| ADAMTS9-AS2_AC090673.1 | 0.041155643 |
| ADAMTS9-AS2_AL356417.2 | 0.086354791 |
| ADAMTS9-AS2_AC007750.1 | 0.57727731  |
| ADAMTS9-AS2_LINC01561  | 0.249780929 |
| ADAMTS9-AS2_LINC01833  | 0.3425317   |
| ADAMTS9-AS2_LINC00460  | 0.306209991 |
| ADAMTS9-AS2_LINC00536  | 0.152550595 |
| ADAMTS9-AS2_AP000553.1 | 0.80823478  |
| ADAMTS9-AS2_AATBC      | 0.637835938 |
| ADAMTS9-AS2_AL161431.1 | 0.324461477 |
| ADAMTS9-AS2_PICSAR     | 0.152233543 |
| ADAMTS9-AS2_LINC01615  | 0.684180759 |
| ADAMTS9-AS2_MIR133A1HG | 0.182218844 |
| ADAMTS9-AS2_AC104984.6 | 0.301532617 |
| ADAMTS9-AS2_AL023755.1 | 0.149563504 |
| ADAMTS9-AS2_AL359851.1 | 0.205173469 |
| ADAMTS9-AS2_AC015923.1 | 0.07472606  |
| ADAMTS9-AS2_AC005828.1 | 0.420805752 |
| ADAMTS9-AS2_AC023034.1 | 0.422263478 |
| ADAMTS9-AS2_AC099811.5 | 0.278260052 |
| ADAMTS9-AS2_FP325330.3 | 0.1362966   |
| ADAMTS9-AS2_AL355075.4 | 0.001710951 |
| ADAMTS9-AS2_RMRP       | 0.872425045 |

---

---

|                        |             |
|------------------------|-------------|
| ADAMTS9-AS2_AC037487.2 | 0.242094938 |
| ADAMTS9-AS2_AC006141.1 | 0.220052478 |
| ADAMTS9-AS2_LINC02443  | 0.335615436 |
| ADAMTS9-AS2_MIR181A1HG | 0.973690378 |
| ADAMTS9-AS2_LINC02465  | 0.639876584 |
| ADAMTS9-AS2_AC091906.1 | 0.841088876 |
| AP001107.5_AC087521.1  | 0.275149345 |
| AP001107.5_AC007671.1  | 0.381310871 |
| AP001107.5_LINC01081   | 0.288390616 |
| AP001107.5_HAND2-AS1   | 0.585433903 |
| AP001107.5_AC005180.2  | 0.402163442 |
| AP001107.5_LINC00702   | 0.410845513 |
| AP001107.5_MBNL1-AS1   | 0.029128338 |
| AP001107.5_LINC01614   | 0.28331758  |
| AP001107.5_MIR100HG    | 0.667465446 |
| AP001107.5_JAZF1-AS1   | 0.393288508 |
| AP001107.5_AC022893.1  | 0.298647479 |
| AP001107.5_ACTA2-AS1   | 0.042617542 |
| AP001107.5_AP003071.3  | 0.410752631 |
| AP001107.5_LINC01352   | 0.197916733 |
| AP001107.5_AC134312.1  | 0.206256283 |
| AP001107.5_AC091588.3  | 0.130194274 |
| AP001107.5_HLX-AS1     | 0.462903885 |
| AP001107.5_LINC00402   | 0.124706812 |
| AP001107.5_LINC01781   | 0.117304782 |
| AP001107.5_AC007128.1  | 0.426713748 |
| AP001107.5_AC099850.3  | 0.413637046 |
| AP001107.5_AC010655.2  | 0.136102806 |
| AP001107.5_LINC00941   | 0.194953009 |
| AP001107.5_MYOSLID     | 0.564066661 |
| AP001107.5_AL161772.1  | 0.952051837 |
| AP001107.5_AP005432.2  | 0.817835506 |
| AP001107.5_AC099066.2  | 0.532530402 |
| AP001107.5_CDKN2B-AS1  | 0.163774329 |
| AP001107.5_AL449423.1  | 0.226274687 |
| AP001107.5_AL445490.1  | 0.318625848 |
| AP001107.5_U62317.2    | 0.509906012 |
| AP001107.5_AC004988.1  | 0.011532424 |
| AP001107.5_LINC02195   | 0.161649548 |
| AP001107.5_AC090125.1  | 0.757227166 |
| AP001107.5_LINC01048   | 0.691415936 |
| AP001107.5_AC090673.1  | 0.556530879 |
| AP001107.5_AL356417.2  | 0.416806949 |
| AP001107.5_AC007750.1  | 0.134343476 |

---

---

|                       |             |
|-----------------------|-------------|
| AP001107.5_LINC01561  | 0.301735532 |
| AP001107.5_LINC01833  | 0.272425244 |
| AP001107.5_LINC00460  | 0.185653855 |
| AP001107.5_LINC00536  | 0.954008681 |
| AP001107.5_AP000553.1 | 0.184596425 |
| AP001107.5_AATBC      | 0.055543402 |
| AP001107.5_AL161431.1 | 0.538141844 |
| AP001107.5_PICSAR     | 0.033935963 |
| AP001107.5_LINC01615  | 0.375358425 |
| AP001107.5_LINC00641  | 0.287617379 |
| AP001107.5_MIR133A1HG | 0.192673879 |
| AP001107.5_AC104984.6 | 0.188460448 |
| AP001107.5_AL023755.1 | 0.026061421 |
| AP001107.5_AL359851.1 | 0.130944292 |
| AP001107.5_AC015923.1 | 0.087774559 |
| AP001107.5_AC005828.1 | 0.105212071 |
| AP001107.5_AC023034.1 | 0.171354349 |
| AP001107.5_AC099811.5 | 0.62496653  |
| AP001107.5_FP325330.3 | 0.007187964 |
| AP001107.5_AL355075.4 | 0.133633294 |
| AP001107.5_RMRP       | 0.068405112 |
| AP001107.5_AC037487.2 | 0.356556783 |
| AP001107.5_AC006141.1 | 0.155104327 |
| AP001107.5_LINC02443  | 0.019247164 |
| AP001107.5_MIR181A1HG | 0.370098506 |
| AP001107.5_LINC02465  | 0.271627992 |
| AP001107.5_AC091906.1 | 0.136246628 |
| AC087521.1_AC007671.1 | 0.287152274 |
| AC087521.1_LINC01081  | 0.201701093 |
| AC087521.1_HAND2-AS1  | 0.387241688 |
| AC087521.1_AC005180.2 | 0.810631697 |
| AC087521.1_LINC00702  | 0.652865809 |
| AC087521.1_MBNL1-AS1  | 0.296945179 |
| AC087521.1_LINC01614  | 0.112623579 |
| AC087521.1_MIR100HG   | 0.829805915 |
| AC087521.1_JAZF1-AS1  | 0.085034959 |
| AC087521.1_AC022893.1 | 0.183366826 |
| AC087521.1_ACTA2-AS1  | 0.146037175 |
| AC087521.1_AP003071.3 | 0.819281425 |
| AC087521.1_LINC01352  | 0.257514849 |
| AC087521.1_AC134312.1 | 0.609320312 |
| AC087521.1_AC091588.3 | 0.466266558 |
| AC087521.1_HLX-AS1    | 0.681607852 |
| AC087521.1_LINC00402  | 0.927215287 |

---

---

|                       |             |
|-----------------------|-------------|
| AC087521.1_LINC01781  | 0.777473287 |
| AC087521.1_AC007128.1 | 0.297457336 |
| AC087521.1_AC099850.3 | 0.69047262  |
| AC087521.1_AC010655.2 | 0.042989831 |
| AC087521.1_LINC00941  | 0.834639825 |
| AC087521.1_MYOSLID    | 0.413923665 |
| AC087521.1_AL161772.1 | 0.972370056 |
| AC087521.1_AP005432.2 | 0.258416766 |
| AC087521.1_AC099066.2 | 0.290611232 |
| AC087521.1_CDKN2B-AS1 | 0.361634618 |
| AC087521.1_AL449423.1 | 0.534692615 |
| AC087521.1_AL445490.1 | 0.28288204  |
| AC087521.1_AC004988.1 | 0.32262317  |
| AC087521.1_LINC02195  | 0.092248227 |
| AC087521.1_AC090125.1 | 0.534033067 |
| AC087521.1_LINC01048  | 0.110114189 |
| AC087521.1_AC090673.1 | 0.046964699 |
| AC087521.1_AL356417.2 | 0.281211732 |
| AC087521.1_AC007750.1 | 0.688371502 |
| AC087521.1_LINC01561  | 0.611645624 |
| AC087521.1_LINC01833  | 0.356160477 |
| AC087521.1_LINC00460  | 0.517075808 |
| AC087521.1_LINC00536  | 0.055505801 |
| AC087521.1_AP000553.1 | 0.542592439 |
| AC087521.1_AATBC      | 0.000401669 |
| AC087521.1_AL161431.1 | 0.19633382  |
| AC087521.1_PICSA      | 0.409528572 |
| AC087521.1_LINC01615  | 0.115455214 |
| AC087521.1_LINC00641  | 0.798612329 |
| AC087521.1_MIR133A1HG | 0.434867318 |
| AC087521.1_AC104984.6 | 0.284357917 |
| AC087521.1_AL023755.1 | 0.03842862  |
| AC087521.1_AL359851.1 | 0.930056647 |
| AC087521.1_AC015923.1 | 0.119563544 |
| AC087521.1_AC005828.1 | 0.547115046 |
| AC087521.1_AC023034.1 | 0.775826419 |
| AC087521.1_AC099811.5 | 0.64645666  |
| AC087521.1_FP325330.3 | 0.141655606 |
| AC087521.1_AL355075.4 | 0.901007533 |
| AC087521.1_RMRP       | 0.119352194 |
| AC087521.1_AC037487.2 | 0.918318223 |
| AC087521.1_AC006141.1 | 0.967764449 |
| AC087521.1_LINC02443  | 0.394295792 |
| AC087521.1_MIR181A1HG | 0.517764912 |

---

---

|                       |             |
|-----------------------|-------------|
| AC087521.1_LINC02465  | 0.404487391 |
| AC087521.1_AC091906.1 | 0.699926068 |
| AC007671.1_LINC01081  | 0.709226203 |
| AC007671.1_HAND2-AS1  | 0.778859857 |
| AC007671.1_AC005180.2 | 0.018091289 |
| AC007671.1_LINC00702  | 0.386404589 |
| AC007671.1_MBNL1-AS1  | 0.488742872 |
| AC007671.1_LINC01614  | 0.678539464 |
| AC007671.1_MIR100HG   | 0.746111226 |
| AC007671.1_JAZF1-AS1  | 0.90126998  |
| AC007671.1_AC022893.1 | 0.187765325 |
| AC007671.1_ACTA2-AS1  | 0.028096069 |
| AC007671.1_AP003071.3 | 0.447556219 |
| AC007671.1_LINC01352  | 0.978449218 |
| AC007671.1_AC134312.1 | 0.496814339 |
| AC007671.1_AC091588.3 | 0.591423437 |
| AC007671.1_HLX-AS1    | 0.740820201 |
| AC007671.1_LINC00402  | 0.570679749 |
| AC007671.1_LINC01781  | 0.42338373  |
| AC007671.1_AC007128.1 | 0.288551143 |
| AC007671.1_AC099850.3 | 0.252496528 |
| AC007671.1_AC010655.2 | 0.831579469 |
| AC007671.1_LINC00941  | 0.786874425 |
| AC007671.1_MYOSLID    | 0.557152429 |
| AC007671.1_AL161772.1 | 0.159239273 |
| AC007671.1_AP005432.2 | 0.08492922  |
| AC007671.1_AC099066.2 | 0.940736654 |
| AC007671.1_CDKN2B-AS1 | 0.228993576 |
| AC007671.1_AL449423.1 | 0.951589683 |
| AC007671.1_AL445490.1 | 0.009600635 |
| AC007671.1_AC004988.1 | 0.411848315 |
| AC007671.1_LINC02195  | 0.52454051  |
| AC007671.1_AC090125.1 | 0.813485716 |
| AC007671.1_LINC01048  | 0.488478222 |
| AC007671.1_AC090673.1 | 0.525804309 |
| AC007671.1_AL356417.2 | 0.406061677 |
| AC007671.1_AC007750.1 | 0.449718906 |
| AC007671.1_LINC01561  | 0.511888092 |
| AC007671.1_LINC01833  | 0.269861378 |
| AC007671.1_LINC00460  | 0.306368646 |
| AC007671.1_LINC00536  | 0.772635452 |
| AC007671.1_AP000553.1 | 0.519390524 |
| AC007671.1_AATBC      | 0.760140517 |
| AC007671.1_AL161431.1 | 0.170827941 |

---

---

|                       |             |
|-----------------------|-------------|
| AC007671.1_PICSA      | 0.393719776 |
| AC007671.1_LINC01615  | 0.235917442 |
| AC007671.1_LINC00641  | 0.030515299 |
| AC007671.1_MIR133A1HG | 0.665015207 |
| AC007671.1_AC104984.6 | 0.324449186 |
| AC007671.1_AL023755.1 | 0.6026906   |
| AC007671.1_AL359851.1 | 0.563340967 |
| AC007671.1_AC015923.1 | 0.21543533  |
| AC007671.1_AC005828.1 | 0.308612731 |
| AC007671.1_AC023034.1 | 0.196807458 |
| AC007671.1_AC099811.5 | 0.380496393 |
| AC007671.1_FP325330.3 | 0.293207013 |
| AC007671.1_AL355075.4 | 0.655837491 |
| AC007671.1_RMRP       | 0.87784687  |
| AC007671.1_AC037487.2 | 0.677714534 |
| AC007671.1_AC006141.1 | 0.760087866 |
| AC007671.1_LINC02443  | 0.320364228 |
| AC007671.1_MIR181A1HG | 0.354000408 |
| AC007671.1_LINC02465  | 0.745279212 |
| AC007671.1_AC091906.1 | 0.72188931  |
| LINC01081_HAND2-AS1   | 0.840929747 |
| LINC01081_AC005180.2  | 0.615360435 |
| LINC01081_LINC00702   | 0.54711769  |
| LINC01081_MBNL1-AS1   | 0.722377359 |
| LINC01081_LINC01614   | 0.768570155 |
| LINC01081_MIR100HG    | 0.240657266 |
| LINC01081_JAZF1-AS1   | 0.908497862 |
| LINC01081_AC022893.1  | 0.51602388  |
| LINC01081_ACTA2-AS1   | 0.408825025 |
| LINC01081_AP003071.3  | 0.624333592 |
| LINC01081_LINC01352   | 0.436737383 |
| LINC01081_AC134312.1  | 0.708322891 |
| LINC01081_AC091588.3  | 0.512690397 |
| LINC01081_HLX-AS1     | 0.498293387 |
| LINC01081_LINC00402   | 0.51904086  |
| LINC01081_LINC01781   | 0.551582382 |
| LINC01081_AC007128.1  | 0.989395943 |
| LINC01081_AC099850.3  | 0.252496528 |
| LINC01081_AC010655.2  | 0.541889261 |
| LINC01081_LINC00941   | 0.561841978 |
| LINC01081_MYOSLID     | 0.594574628 |
| LINC01081_AL161772.1  | 0.921956416 |
| LINC01081_AP005432.2  | 0.135607318 |
| LINC01081_AC099066.2  | 0.387876329 |

---

---

|                      |             |
|----------------------|-------------|
| LINC01081_CDKN2B-AS1 | 0.457742983 |
| LINC01081_AL449423.1 | 0.904538632 |
| LINC01081_AL445490.1 | 0.964447843 |
| LINC01081_AC004988.1 | 0.593827345 |
| LINC01081_LINC02195  | 0.884841164 |
| LINC01081_AC090125.1 | 0.744758507 |
| LINC01081_LINC01048  | 0.584591713 |
| LINC01081_AC090673.1 | 0.62586036  |
| LINC01081_AL356417.2 | 0.759912998 |
| LINC01081_AC007750.1 | 0.379441004 |
| LINC01081_LINC01561  | 0.845041363 |
| LINC01081_LINC01833  | 0.741780509 |
| LINC01081_LINC00460  | 0.586020897 |
| LINC01081_LINC00536  | 0.58490819  |
| LINC01081_AP000553.1 | 0.873296522 |
| LINC01081_AATBC      | 0.668113912 |
| LINC01081_AL161431.1 | 0.048090775 |
| LINC01081_PICSA      | 0.324123654 |
| LINC01081_LINC01615  | 0.286338612 |
| LINC01081_LINC00641  | 0.546197772 |
| LINC01081_MIR133A1HG | 0.733284743 |
| LINC01081_AC104984.6 | 0.548622384 |
| LINC01081_AL023755.1 | 0.841826778 |
| LINC01081_AL359851.1 | 0.932953608 |
| LINC01081_AC015923.1 | 0.163376366 |
| LINC01081_AC005828.1 | 0.367501994 |
| LINC01081_AC023034.1 | 0.994818616 |
| LINC01081_AC099811.5 | 0.389712824 |
| LINC01081_FP325330.3 | 0.729158576 |
| LINC01081_AL355075.4 | 0.425343276 |
| LINC01081_RMRP       | 0.966059974 |
| LINC01081_AC037487.2 | 0.618312705 |
| LINC01081_AC006141.1 | 0.686114683 |
| LINC01081_LINC02443  | 0.916356473 |
| LINC01081_MIR181A1HG | 0.875071906 |
| LINC01081_LINC02465  | 0.774816606 |
| LINC01081_AC091906.1 | 0.171168369 |
| HAND2-AS1_AC005180.2 | 0.709051923 |
| HAND2-AS1_LINC00702  | 0.5309984   |
| HAND2-AS1_MBNL1-AS1  | 0.877570439 |
| HAND2-AS1_LINC01614  | 0.043256196 |
| HAND2-AS1_MIR100HG   | 0.533888111 |
| HAND2-AS1_JAZF1-AS1  | 0.749737047 |
| HAND2-AS1_AC022893.1 | 0.88351325  |

---



---

|                      |             |
|----------------------|-------------|
| HAND2-AS1_ACTA2-AS1  | 0.094892827 |
| HAND2-AS1_AP003071.3 | 0.441132552 |
| HAND2-AS1_LINC01352  | 0.603903144 |
| HAND2-AS1_AC134312.1 | 0.303000764 |
| HAND2-AS1_AC091588.3 | 0.91939511  |
| HAND2-AS1_HLX-AS1    | 0.705463033 |
| HAND2-AS1_LINC00402  | 0.891499519 |
| HAND2-AS1_LINC01781  | 0.358447877 |
| HAND2-AS1_AC007128.1 | 0.482859089 |
| HAND2-AS1_AC099850.3 | 0.389368705 |
| HAND2-AS1_AC010655.2 | 0.357519678 |
| HAND2-AS1_LINC00941  | 0.806760336 |
| HAND2-AS1_MYOSLID    | 0.582982386 |
| HAND2-AS1_AL161772.1 | 0.358535338 |
| HAND2-AS1_AP005432.2 | 0.365274394 |
| HAND2-AS1_AC099066.2 | 0.304288427 |
| HAND2-AS1_CDKN2B-AS1 | 0.190877858 |
| HAND2-AS1_AL449423.1 | 0.961875441 |
| HAND2-AS1_AL445490.1 | 0.18812719  |
| HAND2-AS1_AC004988.1 | 0.121263092 |
| HAND2-AS1_LINC02195  | 0.202485948 |
| HAND2-AS1_AC090125.1 | 0.830792285 |
| HAND2-AS1_LINC01048  | 0.98049266  |
| HAND2-AS1_AC090673.1 | 0.040185241 |
| HAND2-AS1_AL356417.2 | 0.076214986 |
| HAND2-AS1_AC007750.1 | 0.743145153 |
| HAND2-AS1_LINC01561  | 0.769781462 |
| HAND2-AS1_LINC01833  | 0.022014179 |
| HAND2-AS1_LINC00460  | 0.466402978 |
| HAND2-AS1_LINC00536  | 0.203322554 |
| HAND2-AS1_AP000553.1 | 0.948392628 |
| HAND2-AS1_AATBC      | 0.846611748 |
| HAND2-AS1_AL161431.1 | 0.007238402 |
| HAND2-AS1_PICSAR     | 0.059771715 |
| HAND2-AS1_LINC01615  | 0.908146026 |
| HAND2-AS1_LINC00641  | 0.038257017 |
| HAND2-AS1_MIR133A1HG | 0.06603793  |
| HAND2-AS1_AC104984.6 | 0.358164099 |
| HAND2-AS1_AL023755.1 | 0.077772808 |
| HAND2-AS1_AL359851.1 | 0.169658833 |
| HAND2-AS1_AC015923.1 | 0.013872889 |
| HAND2-AS1_AC005828.1 | 0.062774325 |
| HAND2-AS1_AC023034.1 | 0.523275432 |
| HAND2-AS1_AC099811.5 | 0.693845296 |

---

---

|                       |             |
|-----------------------|-------------|
| HAND2-AS1_FP325330.3  | 0.495269141 |
| HAND2-AS1_AL355075.4  | 0.375055633 |
| HAND2-AS1_RMRP        | 0.6770006   |
| HAND2-AS1_AC037487.2  | 0.318218661 |
| HAND2-AS1_AC006141.1  | 0.56315844  |
| HAND2-AS1_LINC02443   | 0.257211072 |
| HAND2-AS1_MIR181A1HG  | 0.713429332 |
| HAND2-AS1_LINC02465   | 0.503618366 |
| HAND2-AS1_AC091906.1  | 0.215046248 |
| AC005180.2_LINC00702  | 0.151692895 |
| AC005180.2_MBNL1-AS1  | 0.245837036 |
| AC005180.2_LINC01614  | 0.399472648 |
| AC005180.2_MIR100HG   | 0.542181787 |
| AC005180.2_JAZF1-AS1  | 0.427776142 |
| AC005180.2_AC022893.1 | 0.868122232 |
| AC005180.2_ACTA2-AS1  | 0.318963132 |
| AC005180.2_AP003071.3 | 0.573922366 |
| AC005180.2_LINC01352  | 0.13445557  |
| AC005180.2_AC134312.1 | 0.555469472 |
| AC005180.2_AC091588.3 | 0.334918539 |
| AC005180.2_HLX-AS1    | 0.316605247 |
| AC005180.2_LINC00402  | 0.201040218 |
| AC005180.2_LINC01781  | 0.725079424 |
| AC005180.2_AC007128.1 | 0.042618983 |
| AC005180.2_AC099850.3 | 0.607716621 |
| AC005180.2_AC010655.2 | 0.240485037 |
| AC005180.2_LINC00941  | 0.428143029 |
| AC005180.2_MYOSLID    | 0.523345451 |
| AC005180.2_AL161772.1 | 0.46039063  |
| AC005180.2_AP005432.2 | 0.40957717  |
| AC005180.2_AC099066.2 | 0.760265118 |
| AC005180.2_CDKN2B-AS1 | 0.538681492 |
| AC005180.2_AL449423.1 | 0.764338109 |
| AC005180.2_AL445490.1 | 0.29563791  |
| AC005180.2_U62317.2   | 0.550461815 |
| AC005180.2_AC004988.1 | 0.93612458  |
| AC005180.2_LINC02195  | 0.036704743 |
| AC005180.2_AC090125.1 | 0.73095196  |
| AC005180.2_LINC01048  | 0.776312381 |
| AC005180.2_AC090673.1 | 0.298954351 |
| AC005180.2_AL356417.2 | 0.56358716  |
| AC005180.2_AC007750.1 | 0.814413783 |
| AC005180.2_LINC01561  | 0.769598025 |
| AC005180.2_LINC01833  | 0.013632022 |

---

---

|                       |             |
|-----------------------|-------------|
| AC005180.2_LINC00460  | 0.5803047   |
| AC005180.2_LINC00536  | 0.021811663 |
| AC005180.2_AP000553.1 | 0.361461764 |
| AC005180.2_AATBC      | 0.429225226 |
| AC005180.2_AL161431.1 | 0.061736877 |
| AC005180.2_PICSAR     | 0.738306979 |
| AC005180.2_LINC01615  | 0.668866262 |
| AC005180.2_LINC00641  | 0.395170197 |
| AC005180.2_MIR133A1HG | 0.988065985 |
| AC005180.2_AC104984.6 | 0.971226576 |
| AC005180.2_AL023755.1 | 0.699175018 |
| AC005180.2_AL359851.1 | 0.441837051 |
| AC005180.2_AC015923.1 | 0.569092408 |
| AC005180.2_AC005828.1 | 0.66262586  |
| AC005180.2_AC023034.1 | 0.46867914  |
| AC005180.2_AC099811.5 | 0.451782504 |
| AC005180.2_FP325330.3 | 0.312470986 |
| AC005180.2_AL355075.4 | 0.758613026 |
| AC005180.2_RMRP       | 0.903388216 |
| AC005180.2_AC037487.2 | 0.875329289 |
| AC005180.2_AC006141.1 | 0.860147703 |
| AC005180.2_LINC02443  | 0.952723436 |
| AC005180.2_MIR181A1HG | 0.78382767  |
| AC005180.2_LINC02465  | 0.571258202 |
| AC005180.2_AC091906.1 | 0.952661472 |
| LINC00702_MBNL1-AS1   | 0.161473608 |
| LINC00702_LINC01614   | 0.030706246 |
| LINC00702_MIR100HG    | 0.042233747 |
| LINC00702_JAZF1-AS1   | 0.176402637 |
| LINC00702_AC022893.1  | 0.251840898 |
| LINC00702_ACTA2-AS1   | 0.029134392 |
| LINC00702_AP003071.3  | 0.374110442 |
| LINC00702_LINC01352   | 0.11801801  |
| LINC00702_AC134312.1  | 0.667577206 |
| LINC00702_AC091588.3  | 0.660218988 |
| LINC00702_HLX-AS1     | 0.489351586 |
| LINC00702_LINC00402   | 0.173622324 |
| LINC00702_LINC01781   | 0.107363321 |
| LINC00702_AC007128.1  | 0.108794561 |
| LINC00702_AC099850.3  | 0.90191644  |
| LINC00702_AC010655.2  | 0.271709726 |
| LINC00702_LINC00941   | 0.13816511  |
| LINC00702_MYOSLID     | 0.65244428  |
| LINC00702_AL161772.1  | 0.272115522 |

---

---

|                       |              |
|-----------------------|--------------|
| LINC00702_AP005432. 2 | 0. 258475846 |
| LINC00702_AC099066. 2 | 0. 789665034 |
| LINC00702_CDKN2B-AS1  | 0. 015614103 |
| LINC00702_AL449423. 1 | 0. 95261199  |
| LINC00702_AL445490. 1 | 0. 390708175 |
| LINC00702_U62317. 2   | 0. 173352419 |
| LINC00702_AC004988. 1 | 0. 023682591 |
| LINC00702_LINC02195   | 0. 021015396 |
| LINC00702_AC090125. 1 | 0. 446132176 |
| LINC00702_LINC01048   | 0. 828490483 |
| LINC00702_AC090673. 1 | 0. 890325098 |
| LINC00702_AL356417. 2 | 0. 715031322 |
| LINC00702_AC007750. 1 | 0. 230156414 |
| LINC00702_LINC01561   | 0. 767413144 |
| LINC00702_LINC01833   | 0. 0221509   |
| LINC00702_LINC00460   | 0. 938766445 |
| LINC00702_LINC00536   | 0. 000989842 |
| LINC00702_AP000553. 1 | 0. 705659003 |
| LINC00702_AATBC       | 0. 340275507 |
| LINC00702_AL161431. 1 | 0. 108803515 |
| LINC00702_PICSA       | 0. 037625995 |
| LINC00702_LINC01615   | 0. 981128075 |
| LINC00702_LINC00641   | 0. 157495885 |
| LINC00702_MIR133A1HG  | 0. 200635875 |
| LINC00702_AC104984. 6 | 0. 414038178 |
| LINC00702_AL023755. 1 | 0. 051500989 |
| LINC00702_AL359851. 1 | 0. 471241782 |
| LINC00702_AC015923. 1 | 0. 009036306 |
| LINC00702_AC005828. 1 | 0. 015868944 |
| LINC00702_AC023034. 1 | 0. 060412914 |
| LINC00702_AC099811. 5 | 0. 448417069 |
| LINC00702_FP325330. 3 | 0. 017423791 |
| LINC00702_AL355075. 4 | 0. 378628197 |
| LINC00702_RMRP        | 0. 535935223 |
| LINC00702_AC037487. 2 | 0. 238524763 |
| LINC00702_AC006141. 1 | 0. 436673908 |
| LINC00702_LINC02443   | 0. 098356517 |
| LINC00702_MIR181A1HG  | 0. 574677144 |
| LINC00702_LINC02465   | 0. 789618548 |
| LINC00702_AC091906. 1 | 0. 167806463 |
| MBNL1-AS1_LINC01614   | 0. 027312249 |
| MBNL1-AS1_MIR100HG    | 0. 054669714 |
| MBNL1-AS1_AC022893. 1 | 0. 142354835 |
| MBNL1-AS1_ACTA2-AS1   | 0. 775396308 |

---

---

|                       |              |
|-----------------------|--------------|
| MBNL1-AS1_AP003071. 3 | 0. 543956397 |
| MBNL1-AS1_LINC01352   | 0. 870238051 |
| MBNL1-AS1_AC134312. 1 | 2. 01E-10    |
| MBNL1-AS1_AC091588. 3 | 0. 036977829 |
| MBNL1-AS1_HLX-AS1     | 0. 19577148  |
| MBNL1-AS1_LINC00402   | 0. 406126076 |
| MBNL1-AS1_LINC01781   | 0. 417626261 |
| MBNL1-AS1_AC007128. 1 | 0. 930879822 |
| MBNL1-AS1_AC099850. 3 | 0. 946635786 |
| MBNL1-AS1_AC010655. 2 | 0. 027479922 |
| MBNL1-AS1_LINC00941   | 0. 241107192 |
| MBNL1-AS1_MYOSLID     | 0. 111486065 |
| MBNL1-AS1_AL161772. 1 | 0. 771573746 |
| MBNL1-AS1_AP005432. 2 | 0. 992729977 |
| MBNL1-AS1_AC099066. 2 | 0. 055765228 |
| MBNL1-AS1_CDKN2B-AS1  | 0. 561311414 |
| MBNL1-AS1_AL449423. 1 | 0. 856213016 |
| MBNL1-AS1_AL445490. 1 | 0. 325312145 |
| MBNL1-AS1_U62317. 2   | 0. 99260774  |
| MBNL1-AS1_AC004988. 1 | 0. 305018092 |
| MBNL1-AS1_LINC02195   | 0. 136689156 |
| MBNL1-AS1_AC090125. 1 | 0. 782280286 |
| MBNL1-AS1_LINC01048   | 0. 007419067 |
| MBNL1-AS1_AC090673. 1 | 0. 72489615  |
| MBNL1-AS1_AL356417. 2 | 0. 24006343  |
| MBNL1-AS1_AC007750. 1 | 0. 876780488 |
| MBNL1-AS1_LINC01561   | 0. 172651683 |
| MBNL1-AS1_LINC01833   | 0. 101040507 |
| MBNL1-AS1_LINC00460   | 0. 501146619 |
| MBNL1-AS1_LINC00536   | 0. 000110899 |
| MBNL1-AS1_AP000553. 1 | 0. 493336268 |
| MBNL1-AS1_AATBC       | 0. 298437172 |
| MBNL1-AS1_AL161431. 1 | 0. 146423836 |
| MBNL1-AS1_PICSAR      | 0. 89493676  |
| MBNL1-AS1_LINC01615   | 0. 11922968  |
| MBNL1-AS1_LINC00641   | 0. 227749856 |
| MBNL1-AS1_MIR133A1HG  | 0. 444611284 |
| MBNL1-AS1_AC104984. 6 | 0. 095056889 |
| MBNL1-AS1_AL023755. 1 | 0. 966304549 |
| MBNL1-AS1_AC015923. 1 | 0. 86876594  |
| MBNL1-AS1_AC005828. 1 | 0. 089315182 |
| MBNL1-AS1_AC023034. 1 | 0. 292819388 |
| MBNL1-AS1_AC099811. 5 | 2. 71E-07    |
| MBNL1-AS1_FP325330. 3 | 0. 087110242 |

---

---

|                       |              |
|-----------------------|--------------|
| MBNL1-AS1_AL355075. 4 | 0. 039811151 |
| MBNL1-AS1_RMRP        | 0. 004835946 |
| MBNL1-AS1_AC037487. 2 | 0. 630532035 |
| MBNL1-AS1_AC006141. 1 | 0. 523395204 |
| MBNL1-AS1_LINC02443   | 0. 051806876 |
| MBNL1-AS1_MIR181A1HG  | 0. 558230318 |
| MBNL1-AS1_LINC02465   | 0. 034406881 |
| MBNL1-AS1_AC091906. 1 | 0. 592792648 |
| LINC01614_MIR100HG    | 0. 184353129 |
| LINC01614_JAZF1-AS1   | 0. 025145695 |
| LINC01614_AC022893. 1 | 0. 20276688  |
| LINC01614_ACTA2-AS1   | 0. 062736868 |
| LINC01614_AP003071. 3 | 0. 164766785 |
| LINC01614_LINC01352   | 0. 02358965  |
| LINC01614_AC134312. 1 | 0. 019221239 |
| LINC01614_AC091588. 3 | 0. 044904013 |
| LINC01614_HLX-AS1     | 0. 050080922 |
| LINC01614_LINC00402   | 0. 079206593 |
| LINC01614_LINC01781   | 0. 024924815 |
| LINC01614_AC007128. 1 | 0. 00061948  |
| LINC01614_AC099850. 3 | 0. 152809745 |
| LINC01614_AC010655. 2 | 0. 044216487 |
| LINC01614_LINC00941   | 0. 097550099 |
| LINC01614_MYOSLID     | 0. 107717835 |
| LINC01614_AL161772. 1 | 0. 05014609  |
| LINC01614_AP005432. 2 | 0. 009662917 |
| LINC01614_AC099066. 2 | 0. 114453823 |
| LINC01614_CDKN2B-AS1  | 0. 122714355 |
| LINC01614_AL449423. 1 | 0. 32331803  |
| LINC01614_AL445490. 1 | 0. 173738108 |
| LINC01614_U62317. 2   | 0. 027106017 |
| LINC01614_AC004988. 1 | 0. 047475461 |
| LINC01614_LINC02195   | 0. 001492674 |
| LINC01614_AC090125. 1 | 0. 031221433 |
| LINC01614_LINC01048   | 0. 082749817 |
| LINC01614_AC090673. 1 | 0. 079709968 |
| LINC01614_AL356417. 2 | 0. 079044794 |
| LINC01614_AC007750. 1 | 0. 021726264 |
| LINC01614_LINC01561   | 0. 162290023 |
| LINC01614_LINC01833   | 0. 001719399 |
| LINC01614_LINC00460   | 0. 968712808 |
| LINC01614_LINC00536   | 0. 148176946 |
| LINC01614_AP000553. 1 | 0. 032378721 |
| LINC01614_AATBC       | 0. 005833998 |

---

---

|                      |             |
|----------------------|-------------|
| LINC01614_AL161431.1 | 0.931466989 |
| LINC01614_PICSAR     | 0.097730109 |
| LINC01614_LINC01615  | 0.075399568 |
| LINC01614_LINC00641  | 0.030490753 |
| LINC01614_MIR133A1HG | 0.030338514 |
| LINC01614_AC104984.6 | 0.041205692 |
| LINC01614_AL023755.1 | 0.030073301 |
| LINC01614_AL359851.1 | 0.022684995 |
| LINC01614_AC015923.1 | 0.040749106 |
| LINC01614_AC005828.1 | 0.042294333 |
| LINC01614_AC023034.1 | 0.065775941 |
| LINC01614_AC099811.5 | 0.144115082 |
| LINC01614_FP325330.3 | 0.013371999 |
| LINC01614_AL355075.4 | 0.060115115 |
| LINC01614_RMRP       | 0.108285601 |
| LINC01614_AC037487.2 | 0.246688635 |
| LINC01614_AC006141.1 | 0.037153687 |
| LINC01614_LINC02443  | 0.024075342 |
| LINC01614_MIR181A1HG | 0.020725712 |
| LINC01614_LINC02465  | 0.064086454 |
| LINC01614_AC091906.1 | 0.041557888 |
| MIR100HG_JAZF1-AS1   | 0.359769049 |
| MIR100HG_AC022893.1  | 0.186172834 |
| MIR100HG_ACTA2-AS1   | 0.057546143 |
| MIR100HG_AP003071.3  | 0.26144913  |
| MIR100HG_LINC01352   | 0.842366404 |
| MIR100HG_AC134312.1  | 0.535463636 |
| MIR100HG_AC091588.3  | 0.430446258 |
| MIR100HG_HLX-AS1     | 0.627624572 |
| MIR100HG_LINC00402   | 0.040870121 |
| MIR100HG_LINC01781   | 0.438240704 |
| MIR100HG_AC007128.1  | 0.043520405 |
| MIR100HG_AC099850.3  | 0.377342931 |
| MIR100HG_AC010655.2  | 0.016862908 |
| MIR100HG_LINC00941   | 0.042081249 |
| MIR100HG_MYOSLID     | 0.717398807 |
| MIR100HG_AL161772.1  | 0.408628983 |
| MIR100HG_AP005432.2  | 0.129833173 |
| MIR100HG_AC099066.2  | 0.26930468  |
| MIR100HG_CDKN2B-AS1  | 0.355571932 |
| MIR100HG_AL449423.1  | 0.384922723 |
| MIR100HG_AL445490.1  | 0.042768207 |
| MIR100HG_U62317.2    | 0.057977887 |
| MIR100HG_AC004988.1  | 0.583541747 |

---

---

|                      |             |
|----------------------|-------------|
| MIR100HG_LINC02195   | 0.028231867 |
| MIR100HG_AC090125.1  | 0.92611859  |
| MIR100HG_LINC01048   | 0.643822291 |
| MIR100HG_AC090673.1  | 0.970706362 |
| MIR100HG_AL356417.2  | 0.732155492 |
| MIR100HG_AC007750.1  | 0.441498489 |
| MIR100HG_LINC01561   | 0.218390981 |
| MIR100HG_LINC01833   | 0.077337936 |
| MIR100HG_LINC00460   | 0.199844124 |
| MIR100HG_LINC00536   | 9.80E-05    |
| MIR100HG_AP000553.1  | 0.863468755 |
| MIR100HG_AATBC       | 8.14E-05    |
| MIR100HG_AL161431.1  | 0.257780023 |
| MIR100HG_PICSAR      | 0.500496566 |
| MIR100HG_LINC01615   | 0.481923202 |
| MIR100HG_LINC00641   | 0.037769675 |
| MIR100HG_MIR133A1HG  | 0.643757185 |
| MIR100HG_AC104984.6  | 0.850657871 |
| MIR100HG_AL023755.1  | 0.09828958  |
| MIR100HG_AL359851.1  | 0.735303302 |
| MIR100HG_AC015923.1  | 0.990863463 |
| MIR100HG_AC005828.1  | 0.131460748 |
| MIR100HG_AC023034.1  | 0.578233721 |
| MIR100HG_AC099811.5  | 0.283693943 |
| MIR100HG_FP325330.3  | 0.403518326 |
| MIR100HG_AL355075.4  | 0.075507351 |
| MIR100HG_RMRP        | 0.737425051 |
| MIR100HG_AC037487.2  | 0.896071471 |
| MIR100HG_AC006141.1  | 0.352202693 |
| MIR100HG_LINC02443   | 0.025500284 |
| MIR100HG_MIR181A1HG  | 0.444611284 |
| MIR100HG_LINC02465   | 0.726365382 |
| MIR100HG_AC091906.1  | 0.171529317 |
| JAZF1-AS1_AC022893.1 | 0.53936763  |
| JAZF1-AS1_ACTA2-AS1  | 0.053310816 |
| JAZF1-AS1_AP003071.3 | 0.350293412 |
| JAZF1-AS1_LINC01352  | 0.636966059 |
| JAZF1-AS1_AC134312.1 | 0.691037373 |
| JAZF1-AS1_AC091588.3 | 0.411892486 |
| JAZF1-AS1_HLX-AS1    | 0.187674877 |
| JAZF1-AS1_LINC00402  | 0.33914808  |
| JAZF1-AS1_LINC01781  | 0.632763112 |
| JAZF1-AS1_AC007128.1 | 0.910614458 |
| JAZF1-AS1_AC099850.3 | 0.564661434 |

---



---

|                       |              |
|-----------------------|--------------|
| JAZF1-AS1_AC010655. 2 | 0. 26398664  |
| JAZF1-AS1_LINC00941   | 0. 289915668 |
| JAZF1-AS1_MYOSLID     | 0. 039325675 |
| JAZF1-AS1_AL161772. 1 | 0. 080096473 |
| JAZF1-AS1_AP005432. 2 | 6. 35E-06    |
| JAZF1-AS1_AC099066. 2 | 0. 91240399  |
| JAZF1-AS1_CDKN2B-AS1  | 0. 042861964 |
| JAZF1-AS1_AL449423. 1 | 0. 735056946 |
| JAZF1-AS1_AL445490. 1 | 0. 200505668 |
| JAZF1-AS1_AC004988. 1 | 0. 962230583 |
| JAZF1-AS1_LINC02195   | 0. 683595821 |
| JAZF1-AS1_AC090125. 1 | 0. 607670515 |
| JAZF1-AS1_LINC01048   | 0. 545294372 |
| JAZF1-AS1_AC090673. 1 | 0. 069568838 |
| JAZF1-AS1_AL356417. 2 | 0. 156108267 |
| JAZF1-AS1_AC007750. 1 | 0. 398939131 |
| JAZF1-AS1_LINC01561   | 0. 926144386 |
| JAZF1-AS1_LINC01833   | 0. 60827402  |
| JAZF1-AS1_LINC00460   | 0. 182032775 |
| JAZF1-AS1_LINC00536   | 0. 066557865 |
| JAZF1-AS1_AP000553. 1 | 0. 933231181 |
| JAZF1-AS1_AATBC       | 0. 155895988 |
| JAZF1-AS1_AL161431. 1 | 0. 054103894 |
| JAZF1-AS1_PICSAR      | 0. 104732556 |
| JAZF1-AS1_LINC01615   | 0. 635006334 |
| JAZF1-AS1_LINC00641   | 0. 909384629 |
| JAZF1-AS1_MIR133A1HG  | 0. 551681204 |
| JAZF1-AS1_AC104984. 6 | 0. 068228609 |
| JAZF1-AS1_AL023755. 1 | 0. 102783747 |
| JAZF1-AS1_AL359851. 1 | 0. 211450997 |
| JAZF1-AS1_AC015923. 1 | 0. 093574193 |
| JAZF1-AS1_AC005828. 1 | 0. 46230625  |
| JAZF1-AS1_AC023034. 1 | 0. 963391348 |
| JAZF1-AS1_AC099811. 5 | 0. 665559357 |
| JAZF1-AS1_FP325330. 3 | 0. 12904826  |
| JAZF1-AS1_AL355075. 4 | 0. 018084939 |
| JAZF1-AS1_RMRP        | 0. 968603134 |
| JAZF1-AS1_AC037487. 2 | 0. 538541146 |
| JAZF1-AS1_AC006141. 1 | 0. 409777172 |
| JAZF1-AS1_LINC02443   | 0. 913061077 |
| JAZF1-AS1_MIR181A1HG  | 0. 676985735 |
| JAZF1-AS1_LINC02465   | 0. 473088473 |
| JAZF1-AS1_AC091906. 1 | 0. 733822025 |
| AC022893. 1_ACTA2-AS1 | 0. 756896389 |

---

---

|                       |             |
|-----------------------|-------------|
| AC022893.1_AP003071.3 | 0.97228266  |
| AC022893.1_LINC01352  | 0.999485525 |
| AC022893.1_AC134312.1 | 0.013850835 |
| AC022893.1_AC091588.3 | 0.474826571 |
| AC022893.1_HLX-AS1    | 0.126768891 |
| AC022893.1_LINC00402  | 0.536417328 |
| AC022893.1_LINC01781  | 0.791442547 |
| AC022893.1_AC007128.1 | 0.096070834 |
| AC022893.1_AC099850.3 | 0.967820325 |
| AC022893.1_AC010655.2 | 0.328908421 |
| AC022893.1_LINC00941  | 0.714544546 |
| AC022893.1_MYOSLID    | 0.734781852 |
| AC022893.1_AL161772.1 | 0.637546701 |
| AC022893.1_AP005432.2 | 0.114083741 |
| AC022893.1_AC099066.2 | 0.125780952 |
| AC022893.1_CDKN2B-AS1 | 0.730569285 |
| AC022893.1_AL449423.1 | 0.926888877 |
| AC022893.1_AL445490.1 | 0.606152599 |
| AC022893.1_U62317.2   | 0.212852055 |
| AC022893.1_AC004988.1 | 0.4331282   |
| AC022893.1_LINC02195  | 0.04446845  |
| AC022893.1_AC090125.1 | 0.392642242 |
| AC022893.1_LINC01048  | 0.18451878  |
| AC022893.1_AC090673.1 | 0.633760498 |
| AC022893.1_AL356417.2 | 0.506698143 |
| AC022893.1_AC007750.1 | 0.367562732 |
| AC022893.1_LINC01561  | 0.167414079 |
| AC022893.1_LINC01833  | 0.023757228 |
| AC022893.1_LINC00460  | 0.346714725 |
| AC022893.1_LINC00536  | 0.000189656 |
| AC022893.1_AP000553.1 | 0.497385989 |
| AC022893.1_AATBC      | 0.114536432 |
| AC022893.1_AL161431.1 | 0.062287954 |
| AC022893.1_PICSA      | 0.170048514 |
| AC022893.1_LINC01615  | 0.787538519 |
| AC022893.1_LINC00641  | 0.154028846 |
| AC022893.1_MIR133A1HG | 1.78E-10    |
| AC022893.1_AC104984.6 | 0.802529311 |
| AC022893.1_AL023755.1 | 0.979947319 |
| AC022893.1_AC015923.1 | 0.278902822 |
| AC022893.1_AC005828.1 | 0.196121151 |
| AC022893.1_AC023034.1 | 0.57905031  |
| AC022893.1_AC099811.5 | 0.011788966 |
| AC022893.1_FP325330.3 | 0.125362473 |

---

---

|                       |             |
|-----------------------|-------------|
| AC022893.1_AL355075.4 | 0.848280162 |
| AC022893.1_RMRP       | 0.542784454 |
| AC022893.1_AC037487.2 | 0.477230973 |
| AC022893.1_AC006141.1 | 0.128022603 |
| AC022893.1_LINC02443  | 0.575539356 |
| AC022893.1_MIR181A1HG | 0.681024207 |
| AC022893.1_LINC02465  | 0.034406881 |
| AC022893.1_AC091906.1 | 0.30470598  |
| ACTA2-AS1_AP003071.3  | 0.089581479 |
| ACTA2-AS1_LINC01352   | 0.571310261 |
| ACTA2-AS1_AC134312.1  | 0.131618004 |
| ACTA2-AS1_AC091588.3  | 0.307102536 |
| ACTA2-AS1_HLX-AS1     | 0.422035188 |
| ACTA2-AS1_LINC00402   | 0.095482351 |
| ACTA2-AS1_LINC01781   | 0.604250383 |
| ACTA2-AS1_AC007128.1  | 0.160330064 |
| ACTA2-AS1_AC099850.3  | 0.46219855  |
| ACTA2-AS1_AC010655.2  | 0.18410379  |
| ACTA2-AS1_LINC00941   | 0.982088129 |
| ACTA2-AS1_MYOSLID     | 0.564306959 |
| ACTA2-AS1_AL161772.1  | 0.711036983 |
| ACTA2-AS1_AP005432.2  | 0.166507166 |
| ACTA2-AS1_AC099066.2  | 0.05389411  |
| ACTA2-AS1_CDKN2B-AS1  | 0.799923484 |
| ACTA2-AS1_AL449423.1  | 0.939109198 |
| ACTA2-AS1_AL445490.1  | 0.774024374 |
| ACTA2-AS1_U62317.2    | 0.76301116  |
| ACTA2-AS1_AC004988.1  | 0.795036597 |
| ACTA2-AS1_LINC02195   | 0.124207253 |
| ACTA2-AS1_AC090125.1  | 0.718935493 |
| ACTA2-AS1_LINC01048   | 0.198199507 |
| ACTA2-AS1_AC090673.1  | 0.56445877  |
| ACTA2-AS1_AL356417.2  | 0.958804366 |
| ACTA2-AS1_AC007750.1  | 0.683658834 |
| ACTA2-AS1_LINC01561   | 0.65215076  |
| ACTA2-AS1_LINC01833   | 0.212573799 |
| ACTA2-AS1_LINC00460   | 0.237700845 |
| ACTA2-AS1_LINC00536   | 1.89E-06    |
| ACTA2-AS1_AP000553.1  | 0.300921855 |
| ACTA2-AS1_AATBC       | 0.13231229  |
| ACTA2-AS1_AL161431.1  | 0.063034912 |
| ACTA2-AS1_PICSAR      | 0.537282359 |
| ACTA2-AS1_LINC01615   | 0.272162406 |
| ACTA2-AS1_LINC00641   | 0.941613088 |

---

---

|                       |             |
|-----------------------|-------------|
| ACTA2-AS1_MIR133A1HG  | 0.197629894 |
| ACTA2-AS1_AC104984.6  | 0.928173052 |
| ACTA2-AS1_AL023755.1  | 0.219541199 |
| ACTA2-AS1_AL359851.1  | 0.188928349 |
| ACTA2-AS1_AC015923.1  | 0.616315353 |
| ACTA2-AS1_AC005828.1  | 0.262118937 |
| ACTA2-AS1_AC023034.1  | 0.458044966 |
| ACTA2-AS1_AC099811.5  | 0.769687087 |
| ACTA2-AS1_FP325330.3  | 0.658657539 |
| ACTA2-AS1_AL355075.4  | 0.225990898 |
| ACTA2-AS1_RMRP        | 0.190753318 |
| ACTA2-AS1_AC037487.2  | 0.503279045 |
| ACTA2-AS1_AC006141.1  | 0.570771548 |
| ACTA2-AS1_LINC02443   | 0.359519188 |
| ACTA2-AS1_MIR181A1HG  | 0.202363786 |
| ACTA2-AS1_LINC02465   | 0.504882176 |
| ACTA2-AS1_AC091906.1  | 0.185900572 |
| AP003071.3_LINC01352  | 0.755669156 |
| AP003071.3_AC134312.1 | 0.572876172 |
| AP003071.3_AC091588.3 | 0.182274502 |
| AP003071.3_HLX-AS1    | 0.378115788 |
| AP003071.3_LINC00402  | 0.103258537 |
| AP003071.3_LINC01781  | 0.273841347 |
| AP003071.3_AC007128.1 | 0.396391716 |
| AP003071.3_AC099850.3 | 0.354835519 |
| AP003071.3_AC010655.2 | 0.668694274 |
| AP003071.3_LINC00941  | 0.852460633 |
| AP003071.3_MYOSLID    | 0.565077415 |
| AP003071.3_AL161772.1 | 0.861897166 |
| AP003071.3_AP005432.2 | 0.067261312 |
| AP003071.3_AC099066.2 | 0.269496639 |
| AP003071.3_CDKN2B-AS1 | 0.047750805 |
| AP003071.3_AL449423.1 | 0.990504267 |
| AP003071.3_AL445490.1 | 0.533541873 |
| AP003071.3_AC004988.1 | 0.010649267 |
| AP003071.3_LINC02195  | 0.068578991 |
| AP003071.3_AC090125.1 | 0.370167417 |
| AP003071.3_LINC01048  | 0.662416745 |
| AP003071.3_AC090673.1 | 0.179019593 |
| AP003071.3_AL356417.2 | 0.271383359 |
| AP003071.3_AC007750.1 | 0.156468477 |
| AP003071.3_LINC01561  | 0.242607405 |
| AP003071.3_LINC01833  | 0.22374517  |
| AP003071.3_LINC00460  | 0.767068541 |

---

---

|                       |             |
|-----------------------|-------------|
| AP003071.3_LINC00536  | 0.63295507  |
| AP003071.3_AP000553.1 | 0.418637305 |
| AP003071.3_AATBC      | 0.109717467 |
| AP003071.3_AL161431.1 | 0.121960275 |
| AP003071.3_PICSAR     | 0.338145174 |
| AP003071.3_LINC01615  | 0.201939179 |
| AP003071.3_LINC00641  | 0.791104835 |
| AP003071.3_MIR133A1HG | 0.349374233 |
| AP003071.3_AC104984.6 | 0.304469276 |
| AP003071.3_AL023755.1 | 0.165117943 |
| AP003071.3_AL359851.1 | 0.409159701 |
| AP003071.3_AC015923.1 | 0.130490471 |
| AP003071.3_AC005828.1 | 0.39072377  |
| AP003071.3_AC023034.1 | 0.637296917 |
| AP003071.3_AC099811.5 | 0.529746862 |
| AP003071.3_FP325330.3 | 0.102767369 |
| AP003071.3_AL355075.4 | 0.805375095 |
| AP003071.3_RMRP       | 0.831097726 |
| AP003071.3_AC037487.2 | 0.058121772 |
| AP003071.3_AC006141.1 | 0.416236128 |
| AP003071.3_LINC02443  | 0.150117342 |
| AP003071.3_MIR181A1HG | 0.225227959 |
| AP003071.3_LINC02465  | 0.331774383 |
| AP003071.3_AC091906.1 | 0.184752832 |
| LINC01352_AC134312.1  | 0.83964118  |
| LINC01352_AC091588.3  | 0.067317149 |
| LINC01352_HLX-AS1     | 0.765314614 |
| LINC01352_LINC00402   | 0.995053231 |
| LINC01352_LINC01781   | 0.374470866 |
| LINC01352_AC007128.1  | 0.739537008 |
| LINC01352_AC099850.3  | 3.32E-06    |
| LINC01352_AC010655.2  | 0.076770489 |
| LINC01352_LINC00941   | 0.463684828 |
| LINC01352_MYOSLID     | 0.257367633 |
| LINC01352_AL161772.1  | 0.610944311 |
| LINC01352_AP005432.2  | 0.298066791 |
| LINC01352_AC099066.2  | 0.889205878 |
| LINC01352_CDKN2B-AS1  | 0.487616067 |
| LINC01352_AL449423.1  | 0.673149936 |
| LINC01352_AL445490.1  | 0.28996232  |
| LINC01352_AC004988.1  | 0.339842541 |
| LINC01352_LINC02195   | 0.681980734 |
| LINC01352_AC090125.1  | 0.798763084 |
| LINC01352_LINC01048   | 0.542241327 |

---

---

|                         |              |
|-------------------------|--------------|
| LINC01352_AC090673. 1   | 0. 555553454 |
| LINC01352_AL356417. 2   | 0. 06062399  |
| LINC01352_AC007750. 1   | 0. 244621113 |
| LINC01352_LINC01561     | 0. 70391657  |
| LINC01352_LINC01833     | 0. 125853204 |
| LINC01352_LINC00460     | 0. 31551752  |
| LINC01352_LINC00536     | 0. 560925456 |
| LINC01352_AP000553. 1   | 0. 875056957 |
| LINC01352_AATBC         | 0. 406251296 |
| LINC01352_AL161431. 1   | 0. 097014229 |
| LINC01352_PICAR         | 0. 700417604 |
| LINC01352_LINC01615     | 0. 124939691 |
| LINC01352_LINC00641     | 0. 042667572 |
| LINC01352_MIR133A1HG    | 0. 997678796 |
| LINC01352_AC104984. 6   | 0. 03269871  |
| LINC01352_AL023755. 1   | 0. 055173019 |
| LINC01352_AL359851. 1   | 0. 721414868 |
| LINC01352_AC015923. 1   | 0. 081813616 |
| LINC01352_AC005828. 1   | 0. 214480236 |
| LINC01352_AC023034. 1   | 0. 302521766 |
| LINC01352_AC099811. 5   | 0. 322940228 |
| LINC01352_FP325330. 3   | 0. 111728256 |
| LINC01352_AL355075. 4   | 0. 176293056 |
| LINC01352_RMRP          | 0. 738933727 |
| LINC01352_AC037487. 2   | 0. 050703008 |
| LINC01352_AC006141. 1   | 0. 411431902 |
| LINC01352_LINC02443     | 0. 121484746 |
| LINC01352_MIR181A1HG    | 0. 819585071 |
| LINC01352_LINC02465     | 0. 782758227 |
| LINC01352_AC091906. 1   | 0. 474790979 |
| AC134312. 1_AC091588. 3 | 0. 497460697 |
| AC134312. 1_HLX-AS1     | 0. 242918793 |
| AC134312. 1_LINC00402   | 0. 400655408 |
| AC134312. 1_LINC01781   | 0. 888488983 |
| AC134312. 1_AC007128. 1 | 0. 646710138 |
| AC134312. 1_AC099850. 3 | 3. 32E-06    |
| AC134312. 1_AC010655. 2 | 0. 290583893 |
| AC134312. 1_LINC00941   | 0. 62343254  |
| AC134312. 1_MYOSLID     | 0. 315748012 |
| AC134312. 1_AL161772. 1 | 0. 07570811  |
| AC134312. 1_AP005432. 2 | 0. 009400911 |
| AC134312. 1_AC099066. 2 | 0. 159901149 |
| AC134312. 1_CDKN2B-AS1  | 0. 568915159 |
| AC134312. 1_AL449423. 1 | 0. 848061395 |

---

---

|                       |             |
|-----------------------|-------------|
| AC134312.1_AL445490.1 | 0.827449671 |
| AC134312.1_AC004988.1 | 0.875028241 |
| AC134312.1_LINC02195  | 0.555946756 |
| AC134312.1_AC090125.1 | 0.924046883 |
| AC134312.1_LINC01048  | 0.713566643 |
| AC134312.1_AC090673.1 | 0.163564415 |
| AC134312.1_AL356417.2 | 0.069831889 |
| AC134312.1_AC007750.1 | 0.967251345 |
| AC134312.1_LINC01561  | 0.34790251  |
| AC134312.1_LINC01833  | 0.534550702 |
| AC134312.1_LINC00460  | 0.971503595 |
| AC134312.1_LINC00536  | 0.727007659 |
| AC134312.1_AP000553.1 | 0.81098604  |
| AC134312.1_AATBC      | 0.925982393 |
| AC134312.1_AL161431.1 | 0.065463242 |
| AC134312.1_PICSAR     | 0.988626589 |
| AC134312.1_LINC01615  | 0.470735563 |
| AC134312.1_MIR133A1HG | 0.498784279 |
| AC134312.1_AC104984.6 | 0.261336382 |
| AC134312.1_AL023755.1 | 0.062446655 |
| AC134312.1_AL359851.1 | 0.709534738 |
| AC134312.1_AC015923.1 | 0.189921111 |
| AC134312.1_AC005828.1 | 0.450131599 |
| AC134312.1_AC023034.1 | 0.446403675 |
| AC134312.1_AC099811.5 | 0.049232159 |
| AC134312.1_FP325330.3 | 0.955458891 |
| AC134312.1_AL355075.4 | 0.145170313 |
| AC134312.1_RMRP       | 0.540610057 |
| AC134312.1_AC037487.2 | 0.140161145 |
| AC134312.1_AC006141.1 | 0.740379257 |
| AC134312.1_LINC02443  | 0.738497661 |
| AC134312.1_MIR181A1HG | 0.305590314 |
| AC134312.1_LINC02465  | 0.938475336 |
| AC134312.1_AC091906.1 | 0.831582629 |
| AC091588.3_HLX-AS1    | 0.814409205 |
| AC091588.3_LINC00402  | 0.629954858 |
| AC091588.3_LINC01781  | 0.933801099 |
| AC091588.3_AC007128.1 | 0.706086274 |
| AC091588.3_AC099850.3 | 3.32E-06    |
| AC091588.3_AC010655.2 | 0.932146635 |
| AC091588.3_LINC00941  | 0.715366531 |
| AC091588.3_MYOSLID    | 0.619841598 |
| AC091588.3_AL161772.1 | 0.355085056 |
| AC091588.3_AP005432.2 | 0.025829445 |

---

---

|                       |             |
|-----------------------|-------------|
| AC091588.3_AC099066.2 | 0.596239818 |
| AC091588.3_CDKN2B-AS1 | 0.122468571 |
| AC091588.3_AL449423.1 | 0.876611412 |
| AC091588.3_AL445490.1 | 0.529444266 |
| AC091588.3_AC004988.1 | 0.356532257 |
| AC091588.3_LINC02195  | 0.475809514 |
| AC091588.3_AC090125.1 | 0.562341329 |
| AC091588.3_LINC01048  | 0.368939407 |
| AC091588.3_AC090673.1 | 0.634651698 |
| AC091588.3_AL356417.2 | 0.272043529 |
| AC091588.3_AC007750.1 | 0.601750439 |
| AC091588.3_LINC01561  | 0.924034394 |
| AC091588.3_LINC01833  | 0.134300317 |
| AC091588.3_LINC00460  | 0.886106116 |
| AC091588.3_LINC00536  | 0.48794317  |
| AC091588.3_AP000553.1 | 0.97646423  |
| AC091588.3_AATBC      | 0.8883032   |
| AC091588.3_AL161431.1 | 0.145872202 |
| AC091588.3_PICSAR     | 0.509612388 |
| AC091588.3_LINC01615  | 0.503271856 |
| AC091588.3_MIR133A1HG | 0.862778916 |
| AC091588.3_AC104984.6 | 0.281642427 |
| AC091588.3_AL023755.1 | 0.639605353 |
| AC091588.3_AL359851.1 | 0.42395493  |
| AC091588.3_AC015923.1 | 0.445449388 |
| AC091588.3_AC005828.1 | 0.801653503 |
| AC091588.3_AC023034.1 | 0.700318214 |
| AC091588.3_AC099811.5 | 0.988645203 |
| AC091588.3_FP325330.3 | 0.222147371 |
| AC091588.3_AL355075.4 | 0.572970634 |
| AC091588.3_RMRP       | 0.625579741 |
| AC091588.3_AC037487.2 | 0.581762761 |
| AC091588.3_AC006141.1 | 0.554256457 |
| AC091588.3_LINC02443  | 0.26054039  |
| AC091588.3_MIR181A1HG | 0.957543307 |
| AC091588.3_LINC02465  | 0.646227791 |
| AC091588.3_AC091906.1 | 0.883208957 |
| HLX-AS1_LINC00402     | 0.036263473 |
| HLX-AS1_LINC01781     | 0.793985213 |
| HLX-AS1_AC007128.1    | 0.720366957 |
| HLX-AS1_AC099850.3    | 0.636228414 |
| HLX-AS1_AC010655.2    | 0.104543126 |
| HLX-AS1_LINC00941     | 0.456280862 |
| HLX-AS1_MYOSLID       | 0.880591952 |

---



---

|                       |              |
|-----------------------|--------------|
| HLX-AS1_AL161772. 1   | 0. 263161721 |
| HLX-AS1_AP005432. 2   | 0. 052453206 |
| HLX-AS1_AC099066. 2   | 0. 243144163 |
| HLX-AS1_CDKN2B-AS1    | 0. 659642603 |
| HLX-AS1_AL449423. 1   | 0. 216350855 |
| HLX-AS1_AL445490. 1   | 0. 101247652 |
| HLX-AS1_AC004988. 1   | 0. 737996417 |
| HLX-AS1_LINC02195     | 0. 360386174 |
| HLX-AS1_AC090125. 1   | 0. 928405132 |
| HLX-AS1_LINC01048     | 0. 84744214  |
| HLX-AS1_AC090673. 1   | 0. 402472307 |
| HLX-AS1_AL356417. 2   | 0. 738609546 |
| HLX-AS1_AC007750. 1   | 0. 69299013  |
| HLX-AS1_LINC01561     | 0. 814968809 |
| HLX-AS1_LINC01833     | 0. 228734616 |
| HLX-AS1_LINC00460     | 0. 678940383 |
| HLX-AS1_LINC00536     | 0. 127263549 |
| HLX-AS1_AP000553. 1   | 0. 1754192   |
| HLX-AS1_AATBC         | 0. 761042495 |
| HLX-AS1_AL161431. 1   | 0. 972974258 |
| HLX-AS1_PICSAR        | 0. 900780288 |
| HLX-AS1_LINC01615     | 0. 281474477 |
| HLX-AS1_LINC00641     | 0. 583434919 |
| HLX-AS1_MIR133A1HG    | 0. 126262136 |
| HLX-AS1_AC104984. 6   | 0. 065452557 |
| HLX-AS1_AL023755. 1   | 0. 04261382  |
| HLX-AS1_AL359851. 1   | 0. 206467651 |
| HLX-AS1_AC015923. 1   | 0. 023849399 |
| HLX-AS1_AC005828. 1   | 0. 308163671 |
| HLX-AS1_AC023034. 1   | 0. 024063812 |
| HLX-AS1_AC099811. 5   | 0. 261321383 |
| HLX-AS1_FP325330. 3   | 0. 038580479 |
| HLX-AS1_AL355075. 4   | 0. 341513956 |
| HLX-AS1_RMRP          | 0. 092063    |
| HLX-AS1_AC037487. 2   | 0. 094563902 |
| HLX-AS1_AC006141. 1   | 0. 147006422 |
| HLX-AS1_LINC02443     | 0. 06137243  |
| HLX-AS1_MIR181A1HG    | 0. 23801745  |
| HLX-AS1_LINC02465     | 0. 059179593 |
| HLX-AS1_AC091906. 1   | 0. 39863524  |
| LINC00402_LINC01781   | 0. 637757166 |
| LINC00402_AC007128. 1 | 0. 611136026 |
| LINC00402_AC099850. 3 | 0. 42748968  |
| LINC00402_AC010655. 2 | 0. 631205347 |

---

---

|                      |             |
|----------------------|-------------|
| LINC00402_LINC00941  | 0.613374355 |
| LINC00402_MYOSLID    | 0.913709025 |
| LINC00402_AL161772.1 | 0.940691353 |
| LINC00402_AP005432.2 | 0.476461679 |
| LINC00402_AC099066.2 | 0.566962858 |
| LINC00402_CDKN2B-AS1 | 0.482446592 |
| LINC00402_AL449423.1 | 0.622963062 |
| LINC00402_AL445490.1 | 0.844211706 |
| LINC00402_AC004988.1 | 0.400453467 |
| LINC00402_LINC02195  | 0.660926795 |
| LINC00402_AC090125.1 | 0.46805374  |
| LINC00402_LINC01048  | 0.621836576 |
| LINC00402_AC090673.1 | 0.463338561 |
| LINC00402_AL356417.2 | 0.279124153 |
| LINC00402_AC007750.1 | 0.432633295 |
| LINC00402_LINC01561  | 0.059921384 |
| LINC00402_LINC01833  | 0.232659502 |
| LINC00402_LINC00460  | 0.027667755 |
| LINC00402_LINC00536  | 0.107878696 |
| LINC00402_AP000553.1 | 0.855507267 |
| LINC00402_AATBC      | 0.964976546 |
| LINC00402_AL161431.1 | 0.204205703 |
| LINC00402_PICSAR     | 0.377682648 |
| LINC00402_LINC01615  | 0.954576055 |
| LINC00402_MIR133A1HG | 0.155996417 |
| LINC00402_AC104984.6 | 0.08710378  |
| LINC00402_AL023755.1 | 0.383936863 |
| LINC00402_AL359851.1 | 0.247361358 |
| LINC00402_AC015923.1 | 0.443585987 |
| LINC00402_AC005828.1 | 0.765897945 |
| LINC00402_AC023034.1 | 0.541985347 |
| LINC00402_AC099811.5 | 0.10997407  |
| LINC00402_FP325330.3 | 0.995962819 |
| LINC00402_AL355075.4 | 0.845828887 |
| LINC00402_RMRP       | 0.764912112 |
| LINC00402_AC037487.2 | 0.581662857 |
| LINC00402_AC006141.1 | 0.243281296 |
| LINC00402_LINC02443  | 0.284018019 |
| LINC00402_MIR181A1HG | 0.392919319 |
| LINC00402_LINC02465  | 0.375186262 |
| LINC00402_AC091906.1 | 0.366905974 |
| LINC01781_AC007128.1 | 0.728471447 |
| LINC01781_AC099850.3 | 0.069794187 |
| LINC01781_AC010655.2 | 0.847493056 |

---

---

|                       |             |
|-----------------------|-------------|
| LINC01781_LINC00941   | 0.82009739  |
| LINC01781_MYOSLID     | 0.910828914 |
| LINC01781_AL161772.1  | 0.558940393 |
| LINC01781_AP005432.2  | 0.548631612 |
| LINC01781_AC099066.2  | 0.412748379 |
| LINC01781_CDKN2B-AS1  | 0.61444716  |
| LINC01781_AL449423.1  | 0.606377447 |
| LINC01781_AL445490.1  | 0.634593072 |
| LINC01781_U62317.2    | 0.760392192 |
| LINC01781_AC004988.1  | 0.813448811 |
| LINC01781_LINC02195   | 0.274758019 |
| LINC01781_AC090125.1  | 0.491636004 |
| LINC01781_LINC01048   | 0.681936948 |
| LINC01781_AC090673.1  | 0.966530762 |
| LINC01781_AL356417.2  | 0.572792661 |
| LINC01781_AC007750.1  | 0.928600774 |
| LINC01781_LINC01561   | 0.819054629 |
| LINC01781_LINC01833   | 0.338400518 |
| LINC01781_LINC00460   | 0.617196601 |
| LINC01781_LINC00536   | 0.979751261 |
| LINC01781_AP000553.1  | 0.862044783 |
| LINC01781_AATBC       | 0.48120147  |
| LINC01781_AL161431.1  | 0.554427694 |
| LINC01781_PICSAR      | 0.46924208  |
| LINC01781_LINC01615   | 0.261769206 |
| LINC01781_LINC00641   | 0.555965325 |
| LINC01781_MIR133A1HG  | 0.708539877 |
| LINC01781_AC104984.6  | 0.411747579 |
| LINC01781_AL023755.1  | 0.739912397 |
| LINC01781_AL359851.1  | 0.752775739 |
| LINC01781_AC015923.1  | 0.382539603 |
| LINC01781_AC005828.1  | 0.665802343 |
| LINC01781_AC023034.1  | 0.6758654   |
| LINC01781_AC099811.5  | 0.818295055 |
| LINC01781_FP325330.3  | 0.525319069 |
| LINC01781_AL355075.4  | 0.776659604 |
| LINC01781_RMRP        | 0.773544096 |
| LINC01781_AC037487.2  | 0.417976987 |
| LINC01781_AC006141.1  | 0.785782903 |
| LINC01781_LINC02443   | 0.96429617  |
| LINC01781_MIR181A1HG  | 0.632323139 |
| LINC01781_LINC02465   | 0.614992226 |
| LINC01781_AC091906.1  | 0.613846043 |
| AC007128.1_AC099850.3 | 0.241558123 |

---

---

|                       |             |
|-----------------------|-------------|
| AC007128.1_AC010655.2 | 0.6152564   |
| AC007128.1_LINC00941  | 0.8941342   |
| AC007128.1_MYOSLID    | 0.284521788 |
| AC007128.1_AL161772.1 | 0.663005157 |
| AC007128.1_AP005432.2 | 0.344914375 |
| AC007128.1_AC099066.2 | 0.143224979 |
| AC007128.1_CDKN2B-AS1 | 0.510722426 |
| AC007128.1_AL449423.1 | 0.414352649 |
| AC007128.1_AL445490.1 | 0.982865085 |
| AC007128.1_U62317.2   | 0.346949337 |
| AC007128.1_AC004988.1 | 0.562149075 |
| AC007128.1_LINC02195  | 0.343023189 |
| AC007128.1_AC090125.1 | 0.266304367 |
| AC007128.1_LINC01048  | 0.761902671 |
| AC007128.1_AC090673.1 | 0.549692076 |
| AC007128.1_AL356417.2 | 0.379842948 |
| AC007128.1_AC007750.1 | 0.672139004 |
| AC007128.1_LINC01561  | 0.46423615  |
| AC007128.1_LINC01833  | 0.137248592 |
| AC007128.1_LINC00460  | 0.912191997 |
| AC007128.1_LINC00536  | 0.199300916 |
| AC007128.1_AP000553.1 | 0.859691738 |
| AC007128.1_AATBC      | 0.001114672 |
| AC007128.1_AL161431.1 | 0.198055439 |
| AC007128.1_PICSA      | 0.292281534 |
| AC007128.1_LINC01615  | 0.256128869 |
| AC007128.1_LINC00641  | 0.459025379 |
| AC007128.1_MIR133A1HG | 0.602974655 |
| AC007128.1_AC104984.6 | 0.58175512  |
| AC007128.1_AL023755.1 | 0.905571425 |
| AC007128.1_AL359851.1 | 0.618649673 |
| AC007128.1_AC015923.1 | 0.770021644 |
| AC007128.1_AC005828.1 | 0.657005984 |
| AC007128.1_AC023034.1 | 0.798636629 |
| AC007128.1_AC099811.5 | 0.734047586 |
| AC007128.1_FP325330.3 | 0.894211658 |
| AC007128.1_AL355075.4 | 0.395297428 |
| AC007128.1_RMRP       | 0.400213608 |
| AC007128.1_AC037487.2 | 0.843270858 |
| AC007128.1_AC006141.1 | 0.835070283 |
| AC007128.1_LINC02443  | 0.55277119  |
| AC007128.1_MIR181A1HG | 0.640537825 |
| AC007128.1_LINC02465  | 0.875408276 |
| AC007128.1_AC091906.1 | 0.776440798 |

---

---

|                       |             |
|-----------------------|-------------|
| AC099850.3_AC010655.2 | 0.264096618 |
| AC099850.3_LINC00941  | 0.861837191 |
| AC099850.3_MYOSLID    | 0.086894209 |
| AC099850.3_AL161772.1 | 0.646287161 |
| AC099850.3_AP005432.2 | 0.754363671 |
| AC099850.3_AC099066.2 | 0.103719234 |
| AC099850.3_CDKN2B-AS1 | 0.296232934 |
| AC099850.3_AL449423.1 | 0.455563488 |
| AC099850.3_AL445490.1 | 0.429749883 |
| AC099850.3_U62317.2   | 0.002548052 |
| AC099850.3_AC004988.1 | 0.455563488 |
| AC099850.3_LINC02195  | 0.172382593 |
| AC099850.3_AC090125.1 | 0.723615386 |
| AC099850.3_LINC01048  | 0.610725824 |
| AC099850.3_AC090673.1 | 0.455563488 |
| AC099850.3_AL356417.2 | 0.93273751  |
| AC099850.3_AC007750.1 | 0.455563488 |
| AC099850.3_LINC01561  | 0.899576327 |
| AC099850.3_LINC01833  | 0.005839331 |
| AC099850.3_LINC00460  | 0.433727296 |
| AC099850.3_LINC00536  | 0.455563488 |
| AC099850.3_AP000553.1 | 0.354835519 |
| AC099850.3_AATBC      | 0.006511008 |
| AC099850.3_AL161431.1 | 0.446444178 |
| AC099850.3_PICSA      | 0.76218127  |
| AC099850.3_LINC01615  | 0.343709349 |
| AC099850.3_LINC00641  | 0.143644965 |
| AC099850.3_MIR133A1HG | 0.455563488 |
| AC099850.3_AC104984.6 | 0.455563488 |
| AC099850.3_AL023755.1 | 0.455563488 |
| AC099850.3_AL359851.1 | 0.455563488 |
| AC099850.3_AC015923.1 | 0.455563488 |
| AC099850.3_AC005828.1 | 0.455563488 |
| AC099850.3_AC023034.1 | 0.455563488 |
| AC099850.3_AC099811.5 | 0.455563488 |
| AC099850.3_FP325330.3 | 0.455563488 |
| AC099850.3_AL355075.4 | 0.511977047 |
| AC099850.3_RMRP       | 0.511977047 |
| AC099850.3_AC037487.2 | 0.455563488 |
| AC099850.3_AC006141.1 | 0.455563488 |
| AC099850.3_LINC02443  | 0.455563488 |
| AC099850.3_MIR181A1HG | 0.455563488 |
| AC099850.3_LINC02465  | 0.455563488 |
| AC099850.3_AC091906.1 | 0.455563488 |

---

---

|                       |             |
|-----------------------|-------------|
| AC010655.2_LINC00941  | 0.876456967 |
| AC010655.2_MYOSLID    | 0.336042802 |
| AC010655.2_AL161772.1 | 0.645397945 |
| AC010655.2_AP005432.2 | 0.900091955 |
| AC010655.2_AC099066.2 | 0.137722381 |
| AC010655.2_CDKN2B-AS1 | 0.435197827 |
| AC010655.2_AL449423.1 | 0.256237181 |
| AC010655.2_AL445490.1 | 0.78872417  |
| AC010655.2_U62317.2   | 0.384704215 |
| AC010655.2_AC004988.1 | 0.097187396 |
| AC010655.2_LINC02195  | 0.405180637 |
| AC010655.2_AC090125.1 | 0.860090131 |
| AC010655.2_LINC01048  | 0.467759912 |
| AC010655.2_AC090673.1 | 0.983494475 |
| AC010655.2_AL356417.2 | 0.605144817 |
| AC010655.2_AC007750.1 | 0.776483009 |
| AC010655.2_LINC01561  | 0.749115967 |
| AC010655.2_LINC01833  | 0.106568839 |
| AC010655.2_LINC00460  | 0.545241909 |
| AC010655.2_LINC00536  | 0.000873924 |
| AC010655.2_AP000553.1 | 0.521865328 |
| AC010655.2_AATBC      | 0.012556517 |
| AC010655.2_AL161431.1 | 0.193563117 |
| AC010655.2_PICSA      | 0.529807977 |
| AC010655.2_LINC01615  | 0.172488345 |
| AC010655.2_LINC00641  | 0.128047291 |
| AC010655.2_MIR133A1HG | 0.798608939 |
| AC010655.2_AC104984.6 | 0.469023568 |
| AC010655.2_AL023755.1 | 0.242298702 |
| AC010655.2_AL359851.1 | 0.555012315 |
| AC010655.2_AC015923.1 | 0.732713375 |
| AC010655.2_AC005828.1 | 0.451011743 |
| AC010655.2_AC023034.1 | 0.103897552 |
| AC010655.2_AC099811.5 | 0.520833789 |
| AC010655.2_FP325330.3 | 0.899713401 |
| AC010655.2_AL355075.4 | 0.665099999 |
| AC010655.2_RMRP       | 0.754887794 |
| AC010655.2_AC037487.2 | 0.930690763 |
| AC010655.2_AC006141.1 | 0.555012315 |
| AC010655.2_LINC02443  | 0.9447377   |
| AC010655.2_MIR181A1HG | 0.638387591 |
| AC010655.2_LINC02465  | 0.772853797 |
| AC010655.2_AC091906.1 | 0.777315538 |
| LINC00941_MYOSLID     | 0.185970816 |

---

---

|                       |              |
|-----------------------|--------------|
| LINC00941_AL161772. 1 | 0. 512685635 |
| LINC00941_AP005432. 2 | 0. 477693023 |
| LINC00941_AC099066. 2 | 0. 264292025 |
| LINC00941_CDKN2B-AS1  | 0. 35917328  |
| LINC00941_AL449423. 1 | 0. 100115114 |
| LINC00941_AL445490. 1 | 0. 756844089 |
| LINC00941_U62317. 2   | 0. 056918481 |
| LINC00941_AC004988. 1 | 0. 778903681 |
| LINC00941_LINC02195   | 0. 014729505 |
| LINC00941_AC090125. 1 | 0. 16553518  |
| LINC00941_LINC01048   | 0. 138955452 |
| LINC00941_AC090673. 1 | 0. 959231601 |
| LINC00941_AL356417. 2 | 0. 163900897 |
| LINC00941_AC007750. 1 | 0. 379262175 |
| LINC00941_LINC01561   | 0. 497549133 |
| LINC00941_LINC01833   | 0. 149467515 |
| LINC00941_LINC00460   | 0. 349511936 |
| LINC00941_LINC00536   | 0. 00913369  |
| LINC00941_AP000553. 1 | 0. 43449805  |
| LINC00941_AATBC       | 0. 114051486 |
| LINC00941_AL161431. 1 | 0. 398613706 |
| LINC00941_PICSAR      | 0. 593182399 |
| LINC00941_LINC01615   | 0. 890251971 |
| LINC00941_LINC00641   | 0. 618894962 |
| LINC00941_MIR133A1HG  | 0. 658312693 |
| LINC00941_AC104984. 6 | 0. 696780063 |
| LINC00941_AL023755. 1 | 0. 802983678 |
| LINC00941_AL359851. 1 | 0. 373561707 |
| LINC00941_AC015923. 1 | 0. 716947354 |
| LINC00941_AC005828. 1 | 0. 78370196  |
| LINC00941_AC023034. 1 | 0. 614630756 |
| LINC00941_AC099811. 5 | 0. 907368538 |
| LINC00941_FP325330. 3 | 0. 654632197 |
| LINC00941_AL355075. 4 | 0. 972239964 |
| LINC00941_RMRP        | 0. 487991524 |
| LINC00941_AC037487. 2 | 0. 74375387  |
| LINC00941_AC006141. 1 | 0. 666215255 |
| LINC00941_LINC02443   | 0. 454623158 |
| LINC00941_MIR181A1HG  | 0. 507700203 |
| LINC00941_LINC02465   | 0. 551572549 |
| LINC00941_AC091906. 1 | 0. 343012979 |
| MYOSLID_AL161772. 1   | 0. 740702356 |
| MYOSLID_AP005432. 2   | 0. 219768304 |
| MYOSLID_AC099066. 2   | 0. 824027086 |

---

---

|                       |             |
|-----------------------|-------------|
| MYOSLID_CDKN2B-AS1    | 0.463084134 |
| MYOSLID_AL449423.1    | 0.144335064 |
| MYOSLID_AL445490.1    | 0.579727614 |
| MYOSLID_U62317.2      | 0.009955656 |
| MYOSLID_AC004988.1    | 0.238437556 |
| MYOSLID_LINC02195     | 0.079130686 |
| MYOSLID_AC090125.1    | 0.281071822 |
| MYOSLID_LINC01048     | 0.971717435 |
| MYOSLID_AC090673.1    | 0.596571139 |
| MYOSLID_AL356417.2    | 0.394694897 |
| MYOSLID_AC007750.1    | 0.825592385 |
| MYOSLID_LINC01561     | 0.8562212   |
| MYOSLID_LINC01833     | 0.142272042 |
| MYOSLID_LINC00460     | 0.557143336 |
| MYOSLID_LINC00536     | 0.111703724 |
| MYOSLID_AP000553.1    | 0.370371255 |
| MYOSLID_AATBC         | 0.168030218 |
| MYOSLID_AL161431.1    | 0.58403669  |
| MYOSLID_PICAR         | 0.230730215 |
| MYOSLID_LINC01615     | 0.61036045  |
| MYOSLID_LINC00641     | 0.076040372 |
| MYOSLID_MIR133A1HG    | 0.808854094 |
| MYOSLID_AC104984.6    | 0.144449105 |
| MYOSLID_AL023755.1    | 0.267030785 |
| MYOSLID_AL359851.1    | 0.954947242 |
| MYOSLID_AC015923.1    | 0.276885095 |
| MYOSLID_AC005828.1    | 0.964380478 |
| MYOSLID_AC023034.1    | 0.846425614 |
| MYOSLID_AC099811.5    | 0.549416766 |
| MYOSLID_FP325330.3    | 0.252864945 |
| MYOSLID_AL355075.4    | 0.504296599 |
| MYOSLID_RMRP          | 0.077325511 |
| MYOSLID_AC037487.2    | 0.604806274 |
| MYOSLID_AC006141.1    | 0.793442058 |
| MYOSLID_LINC02443     | 0.312527649 |
| MYOSLID_MIR181A1HG    | 0.49293252  |
| MYOSLID_LINC02465     | 0.052940658 |
| MYOSLID_AC091906.1    | 0.202096105 |
| AL161772.1_AP005432.2 | 0.002733185 |
| AL161772.1_AC099066.2 | 0.860347239 |
| AL161772.1_CDKN2B-AS1 | 0.644041895 |
| AL161772.1_AL449423.1 | 0.879220915 |
| AL161772.1_AL445490.1 | 0.667294459 |
| AL161772.1_U62317.2   | 0.413703015 |

---



---

|                       |             |
|-----------------------|-------------|
| AL161772.1_AC004988.1 | 0.180915625 |
| AL161772.1_LINC02195  | 0.034873336 |
| AL161772.1_AC090125.1 | 0.38742399  |
| AL161772.1_LINC01048  | 0.076852302 |
| AL161772.1_AC090673.1 | 0.190089029 |
| AL161772.1_AL356417.2 | 0.692037697 |
| AL161772.1_AC007750.1 | 0.239935961 |
| AL161772.1_LINC01561  | 0.272984151 |
| AL161772.1_LINC01833  | 0.000857357 |
| AL161772.1_LINC00460  | 0.846811414 |
| AL161772.1_LINC00536  | 0.006048864 |
| AL161772.1_AP000553.1 | 0.306995584 |
| AL161772.1_AATBC      | 0.003274457 |
| AL161772.1_AL161431.1 | 0.346904323 |
| AL161772.1_PICSAR     | 0.907819328 |
| AL161772.1_LINC01615  | 0.062211424 |
| AL161772.1_LINC00641  | 0.574645646 |
| AL161772.1_MIR133A1HG | 0.84422816  |
| AL161772.1_AC104984.6 | 0.334311366 |
| AL161772.1_AL023755.1 | 0.998819698 |
| AL161772.1_AL359851.1 | 0.77970828  |
| AL161772.1_AC015923.1 | 0.624775827 |
| AL161772.1_AC005828.1 | 0.620880683 |
| AL161772.1_AC023034.1 | 0.744638757 |
| AL161772.1_AC099811.5 | 0.055956902 |
| AL161772.1_FP325330.3 | 0.925314112 |
| AL161772.1_AL355075.4 | 0.294256911 |
| AL161772.1_RMRP       | 0.30091749  |
| AL161772.1_AC037487.2 | 0.357008505 |
| AL161772.1_AC006141.1 | 0.949421938 |
| AL161772.1_LINC02443  | 0.655732388 |
| AL161772.1_MIR181A1HG | 0.649212198 |
| AL161772.1_LINC02465  | 0.829531824 |
| AL161772.1_AC091906.1 | 0.892293689 |
| AP005432.2_AC099066.2 | 0.311126066 |
| AP005432.2_CDKN2B-AS1 | 0.162231343 |
| AP005432.2_AL449423.1 | 0.1695025   |
| AP005432.2_AL445490.1 | 0.96694861  |
| AP005432.2_U62317.2   | 0.675619986 |
| AP005432.2_AC004988.1 | 0.708500634 |
| AP005432.2_LINC02195  | 0.943498956 |
| AP005432.2_AC090125.1 | 0.085710626 |
| AP005432.2_LINC01048  | 0.005443796 |
| AP005432.2_AC090673.1 | 0.303267226 |

---

---

|                       |             |
|-----------------------|-------------|
| AP005432.2_AL356417.2 | 0.241258856 |
| AP005432.2_AC007750.1 | 0.562886206 |
| AP005432.2_LINC01561  | 0.888442567 |
| AP005432.2_LINC01833  | 0.257418083 |
| AP005432.2_LINC00460  | 0.203098487 |
| AP005432.2_LINC00536  | 0.001431491 |
| AP005432.2_AP000553.1 | 0.010123986 |
| AP005432.2_AATBC      | 0.039512697 |
| AP005432.2_AL161431.1 | 0.272711625 |
| AP005432.2_PICSAR     | 0.485148649 |
| AP005432.2_LINC01615  | 0.056260674 |
| AP005432.2_LINC00641  | 0.393483835 |
| AP005432.2_MIR133A1HG | 0.027968837 |
| AP005432.2_AC104984.6 | 0.02583432  |
| AP005432.2_AL023755.1 | 0.153769684 |
| AP005432.2_AL359851.1 | 0.001915391 |
| AP005432.2_AC015923.1 | 0.00329905  |
| AP005432.2_AC005828.1 | 0.002428124 |
| AP005432.2_AC023034.1 | 0.052271005 |
| AP005432.2_AC099811.5 | 0.002651291 |
| AP005432.2_FP325330.3 | 0.019855169 |
| AP005432.2_AL355075.4 | 0.000705024 |
| AP005432.2_RMRP       | 0.003883034 |
| AP005432.2_AC037487.2 | 0.011820832 |
| AP005432.2_AC006141.1 | 0.006524075 |
| AP005432.2_LINC02443  | 0.026901505 |
| AP005432.2_MIR181A1HG | 0.002024467 |
| AP005432.2_LINC02465  | 0.003645765 |
| AP005432.2_AC091906.1 | 0.004575902 |
| AC099066.2_CDKN2B-AS1 | 0.009972378 |
| AC099066.2_AL449423.1 | 0.802699311 |
| AC099066.2_AL445490.1 | 0.165187125 |
| AC099066.2_AC004988.1 | 0.205566039 |
| AC099066.2_LINC02195  | 0.010143348 |
| AC099066.2_AC090125.1 | 0.825308228 |
| AC099066.2_LINC01048  | 0.935726263 |
| AC099066.2_AC090673.1 | 0.581251621 |
| AC099066.2_AL356417.2 | 0.702520526 |
| AC099066.2_AC007750.1 | 0.713076375 |
| AC099066.2_LINC01561  | 0.870035162 |
| AC099066.2_LINC01833  | 0.173761263 |
| AC099066.2_LINC00460  | 0.416306637 |
| AC099066.2_LINC00536  | 0.006790674 |
| AC099066.2_AP000553.1 | 0.692578707 |

---

---

|                       |             |
|-----------------------|-------------|
| AC099066.2_AATBC      | 0.153608004 |
| AC099066.2_AL161431.1 | 0.172557095 |
| AC099066.2_PICSA      | 0.131744027 |
| AC099066.2_LINC01615  | 0.623549159 |
| AC099066.2_LINC00641  | 0.912828969 |
| AC099066.2_MIR133A1HG | 0.588862963 |
| AC099066.2_AC104984.6 | 0.366830232 |
| AC099066.2_AL023755.1 | 0.565294158 |
| AC099066.2_AL359851.1 | 0.590864449 |
| AC099066.2_AC015923.1 | 0.069291852 |
| AC099066.2_AC005828.1 | 0.395873266 |
| AC099066.2_AC023034.1 | 0.880200474 |
| AC099066.2_AC099811.5 | 0.377664522 |
| AC099066.2_FP325330.3 | 0.564977489 |
| AC099066.2_AL355075.4 | 0.686480646 |
| AC099066.2_RMRP       | 0.219393991 |
| AC099066.2_AC037487.2 | 0.954485945 |
| AC099066.2_AC006141.1 | 0.899507792 |
| AC099066.2_LINC02443  | 0.513508324 |
| AC099066.2_MIR181A1HG | 0.957247407 |
| AC099066.2_LINC02465  | 0.356338688 |
| AC099066.2_AC091906.1 | 0.396254203 |
| CDKN2B-AS1_AL449423.1 | 0.223158872 |
| CDKN2B-AS1_AL445490.1 | 0.727028024 |
| CDKN2B-AS1_AC004988.1 | 0.643383717 |
| CDKN2B-AS1_LINC02195  | 0.026490152 |
| CDKN2B-AS1_AC090125.1 | 0.334757156 |
| CDKN2B-AS1_LINC01048  | 0.086257283 |
| CDKN2B-AS1_AC090673.1 | 0.022369602 |
| CDKN2B-AS1_AL356417.2 | 0.541941545 |
| CDKN2B-AS1_AC007750.1 | 0.031180118 |
| CDKN2B-AS1_LINC01561  | 0.228586963 |
| CDKN2B-AS1_LINC01833  | 0.059131547 |
| CDKN2B-AS1_LINC00460  | 0.331487051 |
| CDKN2B-AS1_LINC00536  | 0.004917615 |
| CDKN2B-AS1_AP000553.1 | 0.827015472 |
| CDKN2B-AS1_AATBC      | 0.03559591  |
| CDKN2B-AS1_AL161431.1 | 0.006254577 |
| CDKN2B-AS1_PICSA      | 0.694752995 |
| CDKN2B-AS1_LINC01615  | 0.784987642 |
| CDKN2B-AS1_LINC00641  | 0.96923037  |
| CDKN2B-AS1_MIR133A1HG | 0.607680403 |
| CDKN2B-AS1_AC104984.6 | 0.203349806 |
| CDKN2B-AS1_AL023755.1 | 0.301081178 |

---

---

|                       |             |
|-----------------------|-------------|
| CDKN2B-AS1_AL359851.1 | 0.922894197 |
| CDKN2B-AS1_AC015923.1 | 0.485282196 |
| CDKN2B-AS1_AC005828.1 | 0.682764674 |
| CDKN2B-AS1_AC023034.1 | 0.328134786 |
| CDKN2B-AS1_AC099811.5 | 0.9469466   |
| CDKN2B-AS1_FP325330.3 | 0.665880224 |
| CDKN2B-AS1_AL355075.4 | 0.24109975  |
| CDKN2B-AS1_RMRP       | 0.006849284 |
| CDKN2B-AS1_AC037487.2 | 0.658979439 |
| CDKN2B-AS1_AC006141.1 | 0.054205492 |
| CDKN2B-AS1_LINC02443  | 0.399937669 |
| CDKN2B-AS1_MIR181A1HG | 0.169204878 |
| CDKN2B-AS1_LINC02465  | 0.744691284 |
| CDKN2B-AS1_AC091906.1 | 0.632706878 |
| AL449423.1_AL445490.1 | 0.050440743 |
| AL449423.1_AC004988.1 | 0.463959694 |
| AL449423.1_LINC02195  | 0.076035099 |
| AL449423.1_AC090125.1 | 0.247999417 |
| AL449423.1_LINC01048  | 0.421906859 |
| AL449423.1_AC090673.1 | 0.678616395 |
| AL449423.1_AL356417.2 | 0.739652352 |
| AL449423.1_AC007750.1 | 0.284615667 |
| AL449423.1_LINC01561  | 0.568922751 |
| AL449423.1_LINC01833  | 0.950249716 |
| AL449423.1_LINC00460  | 0.779033391 |
| AL449423.1_LINC00536  | 0.492733418 |
| AL449423.1_AP000553.1 | 0.918476467 |
| AL449423.1_AATBC      | 0.173223601 |
| AL449423.1_AL161431.1 | 0.188479482 |
| AL449423.1_PICSAR     | 0.496371249 |
| AL449423.1_LINC01615  | 0.483101863 |
| AL449423.1_LINC00641  | 0.532635386 |
| AL449423.1_MIR133A1HG | 0.99268963  |
| AL449423.1_AC104984.6 | 0.256708154 |
| AL449423.1_AL023755.1 | 0.494130632 |
| AL449423.1_AL359851.1 | 0.963419176 |
| AL449423.1_AC015923.1 | 0.748930878 |
| AL449423.1_AC005828.1 | 0.602201794 |
| AL449423.1_AC023034.1 | 0.916085976 |
| AL449423.1_AC099811.5 | 0.353201301 |
| AL449423.1_FP325330.3 | 0.906112336 |
| AL449423.1_AL355075.4 | 0.643877844 |
| AL449423.1_RMRP       | 0.421117126 |
| AL449423.1_AC037487.2 | 0.604020433 |

---

---

|                       |             |
|-----------------------|-------------|
| AL449423.1_AC006141.1 | 0.928903223 |
| AL449423.1_LINC02443  | 0.495539953 |
| AL449423.1_MIR181A1HG | 0.991772089 |
| AL449423.1_LINC02465  | 0.856626584 |
| AL449423.1_AC091906.1 | 0.74075407  |
| AL445490.1_AC004988.1 | 0.826177268 |
| AL445490.1_LINC02195  | 0.087654378 |
| AL445490.1_AC090125.1 | 0.226445521 |
| AL445490.1_LINC01048  | 0.627121556 |
| AL445490.1_AC090673.1 | 0.085855001 |
| AL445490.1_AL356417.2 | 0.307300777 |
| AL445490.1_AC007750.1 | 0.565934626 |
| AL445490.1_LINC01561  | 0.470029119 |
| AL445490.1_LINC01833  | 0.262780076 |
| AL445490.1_LINC00460  | 0.440039763 |
| AL445490.1_LINC00536  | 0.341017147 |
| AL445490.1_AP000553.1 | 0.915565065 |
| AL445490.1_AATBC      | 0.787494963 |
| AL445490.1_AL161431.1 | 0.049556263 |
| AL445490.1_PICAR      | 0.830703693 |
| AL445490.1_LINC01615  | 0.446168009 |
| AL445490.1_LINC00641  | 0.631440116 |
| AL445490.1_MIR133A1HG | 0.612023135 |
| AL445490.1_AC104984.6 | 0.088581714 |
| AL445490.1_AL023755.1 | 0.622348942 |
| AL445490.1_AL359851.1 | 0.892547429 |
| AL445490.1_AC015923.1 | 0.830553656 |
| AL445490.1_AC005828.1 | 0.75945564  |
| AL445490.1_AC023034.1 | 0.237280056 |
| AL445490.1_AC099811.5 | 0.599586875 |
| AL445490.1_FP325330.3 | 0.471442462 |
| AL445490.1_AL355075.4 | 0.738176617 |
| AL445490.1_RMRP       | 0.194882675 |
| AL445490.1_AC037487.2 | 0.654095518 |
| AL445490.1_AC006141.1 | 0.944419987 |
| AL445490.1_LINC02443  | 0.950972648 |
| AL445490.1_MIR181A1HG | 0.996178156 |
| AL445490.1_LINC02465  | 0.683267369 |
| AL445490.1_AC091906.1 | 0.818445888 |
| U62317.2_LINC02195    | 0.483109276 |
| U62317.2_AC090125.1   | 0.160409029 |
| U62317.2_LINC01833    | 0.18597131  |
| U62317.2_LINC00460    | 0.256537633 |
| U62317.2_AATBC        | 0.012792428 |

---

---

|                       |             |
|-----------------------|-------------|
| U62317.2_AL161431.1   | 0.308248566 |
| U62317.2_PICSA        | 0.639202051 |
| U62317.2_LINC01615    | 0.742933731 |
| U62317.2_LINC00641    | 0.190429076 |
| U62317.2_AC104984.6   | 0.299638174 |
| U62317.2_AL355075.4   | 0.126254415 |
| U62317.2_RMRP         | 0.126254415 |
| U62317.2_AC037487.2   | 0.006842617 |
| AC004988.1_LINC02195  | 0.879759647 |
| AC004988.1_AC090125.1 | 0.224817266 |
| AC004988.1_LINC01048  | 0.124669042 |
| AC004988.1_AC090673.1 | 0.990289078 |
| AC004988.1_AL356417.2 | 0.054775443 |
| AC004988.1_AC007750.1 | 0.620202586 |
| AC004988.1_LINC01561  | 0.377357367 |
| AC004988.1_LINC01833  | 0.618826824 |
| AC004988.1_LINC00460  | 0.71619323  |
| AC004988.1_LINC00536  | 0.684379361 |
| AC004988.1_AP000553.1 | 0.157665087 |
| AC004988.1_AATBC      | 0.425646574 |
| AC004988.1_AL161431.1 | 0.269022411 |
| AC004988.1_PICSA      | 0.119552546 |
| AC004988.1_LINC01615  | 0.224398355 |
| AC004988.1_LINC00641  | 0.408062094 |
| AC004988.1_MIR133A1HG | 0.203670243 |
| AC004988.1_AC104984.6 | 0.345461335 |
| AC004988.1_AL023755.1 | 0.200352758 |
| AC004988.1_AL359851.1 | 0.122286341 |
| AC004988.1_AC015923.1 | 0.109016539 |
| AC004988.1_AC005828.1 | 0.257750674 |
| AC004988.1_AC023034.1 | 0.198873506 |
| AC004988.1_AC099811.5 | 0.84366394  |
| AC004988.1_FP325330.3 | 0.11953489  |
| AC004988.1_AL355075.4 | 0.629374369 |
| AC004988.1_RMRP       | 0.374063555 |
| AC004988.1_AC037487.2 | 0.910382851 |
| AC004988.1_AC006141.1 | 0.560078312 |
| AC004988.1_LINC02443  | 0.027367266 |
| AC004988.1_MIR181A1HG | 0.674910499 |
| AC004988.1_LINC02465  | 0.521917273 |
| AC004988.1_AC091906.1 | 0.326493457 |
| LINC02195_AC090125.1  | 0.772839613 |
| LINC02195_LINC01048   | 0.742887372 |
| LINC02195_AC090673.1  | 0.927466235 |

---

---

|                         |              |
|-------------------------|--------------|
| LINC02195_AL356417. 2   | 0. 059559171 |
| LINC02195_AC007750. 1   | 0. 899841369 |
| LINC02195_LINC01561     | 0. 63493154  |
| LINC02195_LINC01833     | 0. 950070033 |
| LINC02195_LINC00460     | 0. 087014026 |
| LINC02195_LINC00536     | 0. 267804802 |
| LINC02195_AP000553. 1   | 0. 628809101 |
| LINC02195_AATBC         | 0. 66046283  |
| LINC02195_AL161431. 1   | 0. 029940229 |
| LINC02195_PICSAR        | 0. 428911177 |
| LINC02195_LINC01615     | 0. 000585589 |
| LINC02195_LINC00641     | 0. 017389111 |
| LINC02195_MIR133A1HG    | 0. 7843443   |
| LINC02195_AC104984. 6   | 0. 855647889 |
| LINC02195_AL023755. 1   | 0. 77037512  |
| LINC02195_AL359851. 1   | 0. 967931227 |
| LINC02195_AC015923. 1   | 0. 522066589 |
| LINC02195_AC005828. 1   | 0. 713986711 |
| LINC02195_AC023034. 1   | 0. 293010198 |
| LINC02195_AC099811. 5   | 0. 77193912  |
| LINC02195_FP325330. 3   | 0. 326300016 |
| LINC02195_AL355075. 4   | 0. 673744095 |
| LINC02195_RMRP          | 0. 495545104 |
| LINC02195_AC037487. 2   | 0. 99397681  |
| LINC02195_AC006141. 1   | 0. 929100632 |
| LINC02195_LINC02443     | 0. 718208415 |
| LINC02195_MIR181A1HG    | 0. 67534444  |
| LINC02195_LINC02465     | 0. 85697265  |
| LINC02195_AC091906. 1   | 0. 674208242 |
| AC090125. 1_LINC01048   | 0. 809984834 |
| AC090125. 1_AC090673. 1 | 0. 290857215 |
| AC090125. 1_AL356417. 2 | 0. 879065266 |
| AC090125. 1_AC007750. 1 | 0. 466942266 |
| AC090125. 1_LINC01561   | 0. 494889789 |
| AC090125. 1_LINC01833   | 0. 111113675 |
| AC090125. 1_LINC00460   | 0. 328417725 |
| AC090125. 1_LINC00536   | 0. 82608727  |
| AC090125. 1_AP000553. 1 | 0. 645889744 |
| AC090125. 1_AATBC       | 0. 517355792 |
| AC090125. 1_AL161431. 1 | 0. 400492721 |
| AC090125. 1_PICSAR      | 0. 734359228 |
| AC090125. 1_LINC01615   | 0. 796983992 |
| AC090125. 1_LINC00641   | 0. 250587915 |
| AC090125. 1_MIR133A1HG  | 0. 748050183 |

---

---

|                       |             |
|-----------------------|-------------|
| AC090125.1_AC104984.6 | 0.727294145 |
| AC090125.1_AL023755.1 | 0.523957298 |
| AC090125.1_AL359851.1 | 0.575509458 |
| AC090125.1_AC015923.1 | 0.59178359  |
| AC090125.1_AC005828.1 | 0.876351561 |
| AC090125.1_AC023034.1 | 0.593752523 |
| AC090125.1_AC099811.5 | 0.987901691 |
| AC090125.1_FP325330.3 | 0.391926765 |
| AC090125.1_AL355075.4 | 0.628051094 |
| AC090125.1_RMRP       | 0.753192811 |
| AC090125.1_AC037487.2 | 0.904061968 |
| AC090125.1_AC006141.1 | 0.62758448  |
| AC090125.1_LINC02443  | 0.893329772 |
| AC090125.1_MIR181A1HG | 0.758589592 |
| AC090125.1_LINC02465  | 0.618289346 |
| AC090125.1_AC091906.1 | 0.878895184 |
| LINC01048_AC090673.1  | 0.634571546 |
| LINC01048_AL356417.2  | 0.780273935 |
| LINC01048_AC007750.1  | 0.124765221 |
| LINC01048_LINC01561   | 0.826830571 |
| LINC01048_LINC01833   | 0.60699315  |
| LINC01048_LINC00460   | 0.644476297 |
| LINC01048_LINC00536   | 0.677082837 |
| LINC01048_AP000553.1  | 0.257135034 |
| LINC01048_AATBC       | 0.024402689 |
| LINC01048_AL161431.1  | 0.488548351 |
| LINC01048_PICSAR      | 0.592620595 |
| LINC01048_LINC01615   | 0.342203854 |
| LINC01048_LINC00641   | 0.048518918 |
| LINC01048_MIR133A1HG  | 0.383545801 |
| LINC01048_AC104984.6  | 0.136922728 |
| LINC01048_AL023755.1  | 0.866376829 |
| LINC01048_AL359851.1  | 0.360256765 |
| LINC01048_AC015923.1  | 0.302731967 |
| LINC01048_AC005828.1  | 0.674700004 |
| LINC01048_AC023034.1  | 0.464879267 |
| LINC01048_AC099811.5  | 0.76615277  |
| LINC01048_FP325330.3  | 0.34469989  |
| LINC01048_AL355075.4  | 0.671010999 |
| LINC01048_RMRP        | 0.523930417 |
| LINC01048_AC037487.2  | 0.255144957 |
| LINC01048_AC006141.1  | 0.272599312 |
| LINC01048_LINC02443   | 0.558502254 |
| LINC01048_MIR181A1HG  | 0.476500106 |

---



---

|                       |             |
|-----------------------|-------------|
| LINC01048_LINC02465   | 0.731450802 |
| LINC01048_AC091906.1  | 0.698997675 |
| AC090673.1_AL356417.2 | 0.470193211 |
| AC090673.1_AC007750.1 | 0.008626072 |
| AC090673.1_LINC01561  | 0.419177583 |
| AC090673.1_LINC01833  | 0.067295364 |
| AC090673.1_LINC00460  | 0.408204488 |
| AC090673.1_LINC00536  | 0.072945361 |
| AC090673.1_AP000553.1 | 0.01080623  |
| AC090673.1_AATBC      | 0.62491948  |
| AC090673.1_AL161431.1 | 0.243709321 |
| AC090673.1_PICSA      | 0.012564182 |
| AC090673.1_LINC01615  | 0.228143076 |
| AC090673.1_LINC00641  | 0.475967588 |
| AC090673.1_MIR133A1HG | 0.009948578 |
| AC090673.1_AC104984.6 | 0.076490466 |
| AC090673.1_AL023755.1 | 0.03907635  |
| AC090673.1_AL359851.1 | 0.017333881 |
| AC090673.1_AC015923.1 | 0.024983115 |
| AC090673.1_AC005828.1 | 0.009926333 |
| AC090673.1_AC023034.1 | 0.204636476 |
| AC090673.1_AC099811.5 | 0.018945617 |
| AC090673.1_FP325330.3 | 0.002775777 |
| AC090673.1_AL355075.4 | 0.064027529 |
| AC090673.1_RMRP       | 0.05441831  |
| AC090673.1_AC037487.2 | 0.055842206 |
| AC090673.1_AC006141.1 | 0.011484992 |
| AC090673.1_LINC02443  | 0.009871966 |
| AC090673.1_MIR181A1HG | 0.01508436  |
| AC090673.1_LINC02465  | 0.096241947 |
| AC090673.1_AC091906.1 | 0.022546873 |
| AL356417.2_AC007750.1 | 0.214900425 |
| AL356417.2_LINC01561  | 0.028138164 |
| AL356417.2_LINC01833  | 0.167838968 |
| AL356417.2_LINC00460  | 0.227537359 |
| AL356417.2_LINC00536  | 0.38806202  |
| AL356417.2_AP000553.1 | 0.030212286 |
| AL356417.2_AATBC      | 0.080945242 |
| AL356417.2_AL161431.1 | 0.357510287 |
| AL356417.2_PICSA      | 0.325929389 |
| AL356417.2_LINC01615  | 0.082063946 |
| AL356417.2_LINC00641  | 0.999191252 |
| AL356417.2_MIR133A1HG | 0.047703445 |
| AL356417.2_AC104984.6 | 0.196303405 |

---

---

|                       |             |
|-----------------------|-------------|
| AL356417.2_AL023755.1 | 0.042258202 |
| AL356417.2_AL359851.1 | 0.042012191 |
| AL356417.2_AC015923.1 | 0.092200202 |
| AL356417.2_AC005828.1 | 0.092213861 |
| AL356417.2_AC023034.1 | 0.604141808 |
| AL356417.2_AC099811.5 | 0.359535905 |
| AL356417.2_FP325330.3 | 0.020666805 |
| AL356417.2_AL355075.4 | 0.234013948 |
| AL356417.2_RMRP       | 0.158714068 |
| AL356417.2_AC037487.2 | 0.077384767 |
| AL356417.2_AC006141.1 | 0.063035249 |
| AL356417.2_LINC02443  | 0.407682161 |
| AL356417.2_MIR181A1HG | 0.026807411 |
| AL356417.2_LINC02465  | 0.023644603 |
| AL356417.2_AC091906.1 | 0.08934334  |
| AC007750.1_LINC01561  | 0.647672801 |
| AC007750.1_LINC01833  | 0.182511305 |
| AC007750.1_LINC00460  | 0.057864914 |
| AC007750.1_LINC00536  | 0.060739575 |
| AC007750.1_AP000553.1 | 0.439402934 |
| AC007750.1_AATBC      | 0.666915356 |
| AC007750.1_AL161431.1 | 0.089374072 |
| AC007750.1_PICSAR     | 0.334404281 |
| AC007750.1_LINC01615  | 0.390796118 |
| AC007750.1_LINC00641  | 0.669882731 |
| AC007750.1_MIR133A1HG | 0.549857156 |
| AC007750.1_AC104984.6 | 0.17576474  |
| AC007750.1_AL023755.1 | 0.445609961 |
| AC007750.1_AL359851.1 | 0.471162281 |
| AC007750.1_AC015923.1 | 0.104799324 |
| AC007750.1_AC005828.1 | 0.020451021 |
| AC007750.1_AC023034.1 | 0.582488987 |
| AC007750.1_AC099811.5 | 0.7979846   |
| AC007750.1_FP325330.3 | 0.069999568 |
| AC007750.1_AL355075.4 | 0.396437995 |
| AC007750.1_RMRP       | 0.133211204 |
| AC007750.1_AC037487.2 | 0.15273215  |
| AC007750.1_AC006141.1 | 0.14661486  |
| AC007750.1_LINC02443  | 0.403458352 |
| AC007750.1_MIR181A1HG | 0.805996648 |
| AC007750.1_LINC02465  | 0.456791219 |
| AC007750.1_AC091906.1 | 0.721412831 |
| LINC01561_LINC01833   | 0.232232287 |
| LINC01561_LINC00460   | 0.787879509 |

---

---

|                      |             |
|----------------------|-------------|
| LINC01561_LINC00536  | 0.905211789 |
| LINC01561_AP000553.1 | 0.145683147 |
| LINC01561_AATBC      | 0.627367155 |
| LINC01561_AL161431.1 | 0.652624367 |
| LINC01561_PICSAR     | 0.172122511 |
| LINC01561_LINC01615  | 0.42843782  |
| LINC01561_LINC00641  | 0.989999069 |
| LINC01561_MIR133A1HG | 0.107342845 |
| LINC01561_AC104984.6 | 0.263322403 |
| LINC01561_AL023755.1 | 0.095786612 |
| LINC01561_AL359851.1 | 0.173883122 |
| LINC01561_AC015923.1 | 0.165592917 |
| LINC01561_AC005828.1 | 0.279080486 |
| LINC01561_AC023034.1 | 0.234069685 |
| LINC01561_AC099811.5 | 0.211650685 |
| LINC01561_FP325330.3 | 0.104292529 |
| LINC01561_AL355075.4 | 0.188907242 |
| LINC01561_RMRP       | 0.926021254 |
| LINC01561_AC037487.2 | 0.058830334 |
| LINC01561_AC006141.1 | 0.457551652 |
| LINC01561_LINC02443  | 0.198704673 |
| LINC01561_MIR181A1HG | 0.350498895 |
| LINC01561_LINC02465  | 0.085820907 |
| LINC01561_AC091906.1 | 0.32788784  |
| LINC01833_LINC00460  | 0.056996378 |
| LINC01833_LINC00536  | 0.237988515 |
| LINC01833_AP000553.1 | 0.433706086 |
| LINC01833_AATBC      | 0.404154633 |
| LINC01833_AL161431.1 | 0.035544441 |
| LINC01833_PICSAR     | 0.435523226 |
| LINC01833_LINC01615  | 0.011820402 |
| LINC01833_LINC00641  | 0.001453093 |
| LINC01833_MIR133A1HG | 0.509793678 |
| LINC01833_AC104984.6 | 0.429770699 |
| LINC01833_AL023755.1 | 0.657764916 |
| LINC01833_AL359851.1 | 0.851313925 |
| LINC01833_AC015923.1 | 0.877527211 |
| LINC01833_AC005828.1 | 0.983961936 |
| LINC01833_AC023034.1 | 0.216094901 |
| LINC01833_AC099811.5 | 0.348406311 |
| LINC01833_FP325330.3 | 0.39050155  |
| LINC01833_AL355075.4 | 0.360337154 |
| LINC01833_RMRP       | 0.260653072 |
| LINC01833_AC037487.2 | 0.531863048 |

---

---

|                       |              |
|-----------------------|--------------|
| LINC01833_AC006141. 1 | 0. 233925211 |
| LINC01833_LINC02443   | 0. 466182287 |
| LINC01833_MIR181A1HG  | 0. 509283987 |
| LINC01833_LINC02465   | 0. 392990771 |
| LINC01833_AC091906. 1 | 0. 06000991  |
| LINC00460_LINC00536   | 0. 80452568  |
| LINC00460_AP000553. 1 | 0. 261627776 |
| LINC00460_AATBC       | 0. 334876754 |
| LINC00460_AL161431. 1 | 0. 47039228  |
| LINC00460_PICSAR      | 0. 001337745 |
| LINC00460_LINC01615   | 0. 002963772 |
| LINC00460_LINC00641   | 0. 283787142 |
| LINC00460_MIR133A1HG  | 0. 240972309 |
| LINC00460_AC104984. 6 | 0. 224900736 |
| LINC00460_AL023755. 1 | 0. 054789926 |
| LINC00460_AL359851. 1 | 0. 284228721 |
| LINC00460_AC015923. 1 | 0. 015489491 |
| LINC00460_AC005828. 1 | 0. 060052877 |
| LINC00460_AC023034. 1 | 0. 187426635 |
| LINC00460_AC099811. 5 | 0. 160927126 |
| LINC00460_FP325330. 3 | 0. 059592094 |
| LINC00460_AL355075. 4 | 0. 45117214  |
| LINC00460_RMRP        | 0. 452924121 |
| LINC00460_AC037487. 2 | 0. 47126908  |
| LINC00460_AC006141. 1 | 0. 15810447  |
| LINC00460_LINC02443   | 0. 045503797 |
| LINC00460_MIR181A1HG  | 0. 166347786 |
| LINC00460_LINC02465   | 0. 197796384 |
| LINC00460_AC091906. 1 | 0. 29405248  |
| LINC00536_AP000553. 1 | 0. 37055573  |
| LINC00536_AATBC       | 0. 000110899 |
| LINC00536_AL161431. 1 | 0. 577312534 |
| LINC00536_PICSAR      | 0. 030607721 |
| LINC00536_LINC01615   | 0. 001138669 |
| LINC00536_LINC00641   | 0. 000110899 |
| LINC00536_MIR133A1HG  | 0. 079610098 |
| LINC00536_AC104984. 6 | 0. 236117353 |
| LINC00536_AL023755. 1 | 0. 020866666 |
| LINC00536_AL359851. 1 | 0. 026474201 |
| LINC00536_AC015923. 1 | 0. 101013827 |
| LINC00536_AC005828. 1 | 0. 084205618 |
| LINC00536_AC023034. 1 | 0. 197224602 |
| LINC00536_AC099811. 5 | 0. 129033008 |
| LINC00536_FP325330. 3 | 0. 072636026 |

---

---

|                         |              |
|-------------------------|--------------|
| LINC00536_AL355075. 4   | 0. 07641238  |
| LINC00536_RMRP          | 0. 581586016 |
| LINC00536_AC037487. 2   | 0. 051509563 |
| LINC00536_AC006141. 1   | 0. 055399322 |
| LINC00536_LINC02443     | 0. 335142698 |
| LINC00536_MIR181A1HG    | 0. 375081216 |
| LINC00536_LINC02465     | 0. 273393814 |
| LINC00536_AC091906. 1   | 0. 362917226 |
| AP000553. 1_AL161431. 1 | 0. 474546767 |
| AP000553. 1_PICSAR      | 0. 781492645 |
| AP000553. 1_LINC01615   | 0. 752412835 |
| AP000553. 1_LINC00641   | 0. 567885877 |
| AP000553. 1_MIR133A1HG  | 0. 963449914 |
| AP000553. 1_AC104984. 6 | 0. 963449914 |
| AP000553. 1_AL023755. 1 | 0. 963449914 |
| AP000553. 1_AL359851. 1 | 0. 963449914 |
| AP000553. 1_AC015923. 1 | 0. 963449914 |
| AP000553. 1_AC005828. 1 | 0. 963449914 |
| AP000553. 1_AC023034. 1 | 0. 963449914 |
| AP000553. 1_AC099811. 5 | 0. 963449914 |
| AP000553. 1_FP325330. 3 | 0. 963449914 |
| AP000553. 1_AL355075. 4 | 0. 963449914 |
| AP000553. 1_RMRP        | 0. 963449914 |
| AP000553. 1_AC037487. 2 | 0. 963449914 |
| AP000553. 1_AC006141. 1 | 0. 963449914 |
| AP000553. 1_LINC02443   | 0. 963449914 |
| AP000553. 1_MIR181A1HG  | 0. 963449914 |
| AP000553. 1_LINC02465   | 0. 963449914 |
| AP000553. 1_AC091906. 1 | 0. 727872699 |
| AATBC_AL161431. 1       | 0. 041139427 |
| AATBC_PICSAR            | 0. 16875668  |
| AATBC_LINC01615         | 0. 016292688 |
| AATBC_LINC00641         | 0. 001281406 |
| AATBC_MIR133A1HG        | 0. 629331086 |
| AATBC_AC104984. 6       | 0. 220662645 |
| AATBC_AL023755. 1       | 0. 185719619 |
| AATBC_AC015923. 1       | 0. 98956805  |
| AATBC_AC005828. 1       | 0. 480211135 |
| AATBC_AC023034. 1       | 0. 055741569 |
| AATBC_AC099811. 5       | 0. 951370039 |
| AATBC_FP325330. 3       | 0. 492179308 |
| AATBC_AL355075. 4       | 0. 173733574 |
| AATBC_RMRP              | 0. 201439148 |
| AATBC_AC037487. 2       | 0. 297374419 |

---

---

|                       |             |
|-----------------------|-------------|
| AATBC_LINC02443       | 0.886772154 |
| AATBC_MIR181A1HG      | 0.558230318 |
| AATBC_LINC02465       | 0.0004446   |
| AATBC_AC091906.1      | 0.346507408 |
| AL161431.1_PICSAR     | 0.000468991 |
| AL161431.1_LINC01615  | 0.222307148 |
| AL161431.1_LINC00641  | 0.652867635 |
| AL161431.1_MIR133A1HG | 0.01051303  |
| AL161431.1_AC104984.6 | 0.00027458  |
| AL161431.1_AL023755.1 | 0.012659191 |
| AL161431.1_AL359851.1 | 0.031741371 |
| AL161431.1_AC015923.1 | 0.040641863 |
| AL161431.1_AC005828.1 | 0.026678376 |
| AL161431.1_AC023034.1 | 0.066461317 |
| AL161431.1_AC099811.5 | 0.031272101 |
| AL161431.1_FP325330.3 | 0.000835711 |
| AL161431.1_AL355075.4 | 0.000716701 |
| AL161431.1_RMRP       | 0.04638701  |
| AL161431.1_AC037487.2 | 0.013510656 |
| AL161431.1_AC006141.1 | 0.004361499 |
| AL161431.1_LINC02443  | 0.002965153 |
| AL161431.1_MIR181A1HG | 0.01417887  |
| AL161431.1_LINC02465  | 0.007196596 |
| AL161431.1_AC091906.1 | 0.001770821 |
| PICSAR_LINC01615      | 0.48129391  |
| PICSAR_LINC00641      | 0.512912107 |
| PICSAR_MIR133A1HG     | 0.232110598 |
| PICSAR_AC104984.6     | 0.656330013 |
| PICSAR_AL023755.1     | 0.980718196 |
| PICSAR_AL359851.1     | 0.340050767 |
| PICSAR_AC015923.1     | 0.202696889 |
| PICSAR_AC005828.1     | 0.543612081 |
| PICSAR_AC023034.1     | 0.704343428 |
| PICSAR_AC099811.5     | 0.206982235 |
| PICSAR_FP325330.3     | 0.925949414 |
| PICSAR_AL355075.4     | 0.686192439 |
| PICSAR_RMRP           | 0.108306414 |
| PICSAR_AC037487.2     | 0.384876552 |
| PICSAR_AC006141.1     | 0.188529763 |
| PICSAR_LINC02443      | 0.377330856 |
| PICSAR_MIR181A1HG     | 0.235088927 |
| PICSAR_LINC02465      | 0.257824068 |
| PICSAR_AC091906.1     | 0.218974576 |
| LINC01615_LINC00641   | 0.076370836 |

---

---

|                       |             |
|-----------------------|-------------|
| LINC01615_MIR133A1HG  | 0.612979588 |
| LINC01615_AC104984.6  | 0.380721657 |
| LINC01615_AL023755.1  | 0.233756018 |
| LINC01615_AL359851.1  | 0.486360212 |
| LINC01615_AC015923.1  | 0.825903403 |
| LINC01615_AC005828.1  | 0.250317492 |
| LINC01615_AC023034.1  | 0.907576602 |
| LINC01615_AC099811.5  | 0.625807967 |
| LINC01615_FP325330.3  | 0.378594586 |
| LINC01615_AL355075.4  | 0.803115234 |
| LINC01615_RMRP        | 0.882310307 |
| LINC01615_AC037487.2  | 0.81782013  |
| LINC01615_AC006141.1  | 0.510773292 |
| LINC01615_LINC02443   | 0.237743786 |
| LINC01615_MIR181A1HG  | 0.972751941 |
| LINC01615_LINC02465   | 0.505396262 |
| LINC01615_AC091906.1  | 0.055846096 |
| LINC00641_AC104984.6  | 0.508645179 |
| LINC00641_AL023755.1  | 4.13E-07    |
| LINC00641_AC015923.1  | 0.847241026 |
| LINC00641_AC005828.1  | 0.609538103 |
| LINC00641_AC023034.1  | 0.952292503 |
| LINC00641_AC099811.5  | 0.002126016 |
| LINC00641_AL355075.4  | 0.092055643 |
| LINC00641_RMRP        | 0.133945453 |
| LINC00641_AC037487.2  | 2.71E-07    |
| LINC00641_LINC02443   | 0.909384629 |
| LINC00641_MIR181A1HG  | 0.909384629 |
| LINC00641_AC091906.1  | 0.706567578 |
| MIR133A1HG_AC104984.6 | 0.589889894 |
| MIR133A1HG_AL023755.1 | 0.502992249 |
| MIR133A1HG_AL359851.1 | 0.439070627 |
| MIR133A1HG_AC015923.1 | 0.537583198 |
| MIR133A1HG_AC005828.1 | 0.276872164 |
| MIR133A1HG_AC023034.1 | 0.562820729 |
| MIR133A1HG_AC099811.5 | 0.134015781 |
| MIR133A1HG_FP325330.3 | 0.318861019 |
| MIR133A1HG_AL355075.4 | 0.182233322 |
| MIR133A1HG_RMRP       | 0.166552884 |
| MIR133A1HG_AC037487.2 | 0.884601906 |
| MIR133A1HG_AC006141.1 | 0.997441687 |
| MIR133A1HG_LINC02443  | 0.777017656 |
| MIR133A1HG_MIR181A1HG | 0.327833097 |
| MIR133A1HG_LINC02465  | 0.556627413 |

---

---

|                       |             |
|-----------------------|-------------|
| MIR133A1HG_AC091906.1 | 0.134765503 |
| AC104984.6_AL023755.1 | 0.031560538 |
| AC104984.6_AL359851.1 | 0.030137532 |
| AC104984.6_AC015923.1 | 0.149526104 |
| AC104984.6_AC005828.1 | 0.134969734 |
| AC104984.6_AC023034.1 | 0.07740784  |
| AC104984.6_AC099811.5 | 0.091306807 |
| AC104984.6_FP325330.3 | 0.196297381 |
| AC104984.6_AL355075.4 | 0.031365563 |
| AC104984.6_RMRP       | 0.067018774 |
| AC104984.6_AC037487.2 | 0.134939598 |
| AC104984.6_AC006141.1 | 0.158596172 |
| AC104984.6_LINC02443  | 0.06291827  |
| AC104984.6_MIR181A1HG | 0.113115476 |
| AC104984.6_LINC02465  | 0.057970361 |
| AC104984.6_AC091906.1 | 0.481256177 |
| AL023755.1_AL359851.1 | 0.019455952 |
| AL023755.1_AC015923.1 | 0.386445237 |
| AL023755.1_AC005828.1 | 0.372541238 |
| AL023755.1_AC023034.1 | 0.07668532  |
| AL023755.1_AC099811.5 | 0.233616784 |
| AL023755.1_FP325330.3 | 0.08913116  |
| AL023755.1_AL355075.4 | 0.792544762 |
| AL023755.1_RMRP       | 0.021464435 |
| AL023755.1_AC037487.2 | 0.073022111 |
| AL023755.1_AC006141.1 | 0.068690081 |
| AL023755.1_LINC02443  | 0.158800104 |
| AL023755.1_MIR181A1HG | 0.142277779 |
| AL023755.1_LINC02465  | 0.007964118 |
| AL023755.1_AC091906.1 | 0.702446506 |
| AL359851.1_AC015923.1 | 0.166281586 |
| AL359851.1_AC005828.1 | 0.557386943 |
| AL359851.1_AC023034.1 | 0.108100802 |
| AL359851.1_AC099811.5 | 0.105059513 |
| AL359851.1_FP325330.3 | 0.24814934  |
| AL359851.1_AL355075.4 | 0.483087516 |
| AL359851.1_RMRP       | 0.044048856 |
| AL359851.1_AC037487.2 | 0.367175406 |
| AL359851.1_AC006141.1 | 0.877351298 |
| AL359851.1_LINC02443  | 0.162364087 |
| AL359851.1_MIR181A1HG | 0.055169371 |
| AL359851.1_LINC02465  | 0.014699021 |
| AL359851.1_AC091906.1 | 0.253228553 |
| AC015923.1_AC005828.1 | 0.158093725 |

---



---

|                       |             |
|-----------------------|-------------|
| AC015923.1_AC023034.1 | 0.317038125 |
| AC015923.1_AC099811.5 | 0.110902504 |
| AC015923.1_FP325330.3 | 0.424252614 |
| AC015923.1_AL355075.4 | 0.175990465 |
| AC015923.1_RMRP       | 0.101281978 |
| AC015923.1_AC037487.2 | 0.284182338 |
| AC015923.1_AC006141.1 | 0.153330643 |
| AC015923.1_LINC02443  | 0.401506676 |
| AC015923.1_MIR181A1HG | 0.026390734 |
| AC015923.1_LINC02465  | 0.068132831 |
| AC015923.1_AC091906.1 | 0.207491854 |
| AC005828.1_AC023034.1 | 0.965728304 |
| AC005828.1_AC099811.5 | 0.352264773 |
| AC005828.1_FP325330.3 | 0.510167175 |
| AC005828.1_AL355075.4 | 0.085963014 |
| AC005828.1_RMRP       | 0.316218039 |
| AC005828.1_AC037487.2 | 0.590269057 |
| AC005828.1_AC006141.1 | 0.223963833 |
| AC005828.1_LINC02443  | 0.615090915 |
| AC005828.1_MIR181A1HG | 0.150821336 |
| AC005828.1_LINC02465  | 0.103113236 |
| AC005828.1_AC091906.1 | 0.331173227 |
| AC023034.1_AC099811.5 | 0.764117127 |
| AC023034.1_FP325330.3 | 0.891756295 |
| AC023034.1_AL355075.4 | 0.68220102  |
| AC023034.1_RMRP       | 0.787291409 |
| AC023034.1_AC037487.2 | 0.460241015 |
| AC023034.1_AC006141.1 | 0.876949645 |
| AC023034.1_LINC02443  | 0.651296899 |
| AC023034.1_MIR181A1HG | 0.902928126 |
| AC023034.1_LINC02465  | 0.955288049 |
| AC023034.1_AC091906.1 | 0.231671406 |
| AC099811.5_FP325330.3 | 0.753237632 |
| AC099811.5_AL355075.4 | 0.827567423 |
| AC099811.5_RMRP       | 0.148347066 |
| AC099811.5_AC037487.2 | 0.539464141 |
| AC099811.5_AC006141.1 | 0.872964732 |
| AC099811.5_LINC02443  | 0.980938009 |
| AC099811.5_MIR181A1HG | 0.602882475 |
| AC099811.5_LINC02465  | 0.235095175 |
| AC099811.5_AC091906.1 | 0.368630893 |
| FP325330.3_AL355075.4 | 0.142597158 |
| FP325330.3_RMRP       | 0.892244872 |
| FP325330.3_AC037487.2 | 0.250781454 |

---

---

|                       |             |
|-----------------------|-------------|
| FP325330.3_AC006141.1 | 0.246795011 |
| FP325330.3_LINC02443  | 0.489633351 |
| FP325330.3_MIR181A1HG | 0.952726907 |
| FP325330.3_LINC02465  | 0.713833039 |
| FP325330.3_AC091906.1 | 0.747057364 |
| AL355075.4_RMRP       | 0.117022312 |
| AL355075.4_AC037487.2 | 0.867520492 |
| AL355075.4_AC006141.1 | 0.139254197 |
| AL355075.4_LINC02443  | 0.341434914 |
| AL355075.4_MIR181A1HG | 0.022251961 |
| AL355075.4_LINC02465  | 0.019335464 |
| AL355075.4_AC091906.1 | 0.986597319 |
| RMRP_AC037487.2       | 0.247719782 |
| RMRP_AC006141.1       | 0.256551045 |
| RMRP_LINC02443        | 0.205998296 |
| RMRP_MIR181A1HG       | 0.423134273 |
| RMRP_LINC02465        | 0.480292012 |
| RMRP_AC091906.1       | 0.165605525 |
| AC037487.2_AC006141.1 | 0.498541502 |
| AC037487.2_LINC02443  | 0.897673789 |
| AC037487.2_MIR181A1HG | 0.318505491 |
| AC037487.2_LINC02465  | 0.289039088 |
| AC037487.2_AC091906.1 | 0.654483032 |
| AC006141.1_LINC02443  | 0.551382704 |
| AC006141.1_MIR181A1HG | 0.130199617 |
| AC006141.1_LINC02465  | 0.080517732 |
| AC006141.1_AC091906.1 | 0.573257846 |
| LINC02443_MIR181A1HG  | 0.280820901 |
| LINC02443_LINC02465   | 0.327081604 |
| LINC02443_AC091906.1  | 0.916181576 |
| MIR181A1HG_LINC02465  | 0.532838315 |
| MIR181A1HG_AC091906.1 | 0.864673697 |
| LINC02465_AC091906.1  | 0.770402146 |

---
