# Supplementary material for: Development of a Ferroptosis-Related lncRNA Signature to Predict the Prognosis and Immune Landscape of Bladder Cancer
Source: Hindawi journal article supplement (doi:10.1155/2021/1031906), 2021-06-20
Supplement: f1 [file 1031906.f1.zip]

Supplementary Table S9. The prediction of the transcription factors of NOX4.

| seqname           | source | feature | start | end  | score | strand | frame | attributes                                                 |
|-------------------|--------|---------|-------|------|-------|--------|-------|------------------------------------------------------------|
| NOX4 NM_001300995 | TFBS   | TFBS    | 1055  | 1060 | 1     | +      | .     | TF=ZNF354C;class=C2H2 zinc finger factors;sequence=ATCACAC |
| NOX4 NM_001300995 | TFBS   | TFBS    | 221   | 226  | 1     | -      | .     | TF=ZNF354C;class=C2H2 zinc finger factors;sequence=ATCACAC |
| NOX4 NM_001300995 | TFBS   | TFBS    | 746   | 753  | 1     | +      | .     | TF=SHOX;class=Homeodomain factors;sequence=TTAATTGG        |
| NOX4 NM_001300995 | TFBS   | TFBS    | 1718  | 1725 | 1     | +      | .     | TF=SHOX;class=Homeodomain factors;sequence=TTAATTGG        |
| NOX4 NM_001300995 | TFBS   | TFBS    | 746   | 753  | 1     | -      | .     | TF=MSX2;class=Homeodomain factors;sequence=CCATTAA         |
| NOX4 NM_001300995 | TFBS   | TFBS    | 1718  | 1725 | 1     | -      | .     | TF=MSX2;class=Homeodomain factors;sequence=CCATTAA         |
| NOX4 NM_001300995 | TFBS   | TFBS    | 746   | 753  | 1     | -      | .     | TF=RAX2;class=Homeodomain factors;sequence=CCATTAA         |
| NOX4 NM_001300995 | TFBS   | TFBS    | 1718  | 1725 | 1     | -      | .     | TF=RAX2;class=Homeodomain factors;sequence=CCATTAA         |
| NOX4 NM_001300995 | TFBS   | TFBS    | 2138  | 2145 | 1     | -      | .     | TF=MGA;class=T-Box factors;sequence=AGGTGTGA               |
| NOX4 NM_001300995 | TFBS   | TFBS    | 2138  | 2145 | 1     | -      | .     | TF=TBX15;class=T-Box factors;sequence=AGGTGTGA             |
| NOX4 NM_001300995 | TFBS   | TFBS    | 2138  | 2145 | 1     | -      | .     | TF=TBX1;class=T-Box factors;sequence=AGGTGTGA              |

|                   |          |      |          |          |   |   |   |                                                                     |
|-------------------|----------|------|----------|----------|---|---|---|---------------------------------------------------------------------|
| NOX4 NM_001300995 | TFB<br>S | TFBS | 213<br>8 | 21<br>45 | 1 | - | . | TF=TBX4;class=T-Box factors;sequence=AGG TGTGA                      |
| NOX4 NM_001300995 | TFB<br>S | TFBS | 213<br>8 | 21<br>45 | 1 | - | . | TF=TBX5;class=T-Box factors;sequence=AGG TGTGA                      |
| NOX4 NM_001300995 | TFB<br>S | TFBS | 746      | 75<br>3  | 1 | - | . | TF=BSX;class=Homeo domain factors;sequence=CCA ATTAA                |
| NOX4 NM_001300995 | TFB<br>S | TFBS | 171<br>8 | 17<br>25 | 1 | - | . | TF=BSX;class=Homeo domain factors;sequence=CCA ATTAA                |
| NOX4 NM_001300995 | TFB<br>S | TFBS | 147      | 15<br>4  | 1 | + | . | TF=HOXC4;class=Homeo domain factors;sequence=GTC ATTAA              |
| NOX4 NM_001300995 | TFB<br>S | TFBS | 229<br>4 | 23<br>09 | 1 | - | . | TF=ZNF460;class=C2H2 zinc finger factors;sequence=GCC TCAGCCTCCCGAG |
| NOX4 NM_001143837 | TFB<br>S | TFBS | 198      | 20<br>3  | 1 | + | . | TF=ZNF354C;class=C2H2 zinc finger factors;sequence=ATC CAC          |
| NOX4 NM_001143837 | TFB<br>S | TFBS | 416      | 42<br>1  | 1 | - | . | TF=ZNF354C;class=C2H2 zinc finger factors;sequence=ATC CAC          |
| NOX4 NM_001143837 | TFB<br>S | TFBS | 115<br>7 | 11<br>62 | 1 | - | . | TF=ZNF354C;class=C2H2 zinc finger factors;sequence=ATC CAC          |
| NOX4 NM_001143837 | TFB<br>S | TFBS | 117<br>3 | 11<br>79 | 1 | + | . | TF=NFATC2;class=Rel homology region (RHR) factors;sequence=TTT TCCA |
| NOX4 NM_001143837 | TFB<br>S | TFBS | 117<br>4 | 11<br>84 | 1 | + | . | TF=STAT1;class=STAT domain factors;sequence=TTT CCAGGAAA            |
| NOX4 NM_001143837 | TFB<br>S | TFBS | 509      | 51<br>7  | 1 | + | . | TF=PITX3;class=Homeo domain                                         |

|                       |          |      |          |          |   |   |   |                                                                             |
|-----------------------|----------|------|----------|----------|---|---|---|-----------------------------------------------------------------------------|
|                       |          |      |          |          |   |   |   | factors;sequence=CTT<br>AATCCC<br>TF=VSX1;class=Homeo<br>domain             |
| NOX4 NM_00<br>1143837 | TFB<br>S | TFBS | 131<br>6 | 13<br>23 | 1 | - | . | factors;sequence=CTA<br>ATTAT<br>TF=MEIS1;class=Homeo<br>domain             |
| NOX4 NM_00<br>1143837 | TFB<br>S | TFBS | 344      | 35<br>0  | 1 | + | . | factors;sequence=TTG<br>ACAG<br>TF=MGA;class=T-Box                          |
| NOX4 NM_00<br>1143837 | TFB<br>S | TFBS | 213<br>8 | 21<br>45 | 1 | - | . | factors;sequence=AGG<br>TGTGA<br>TF=TBX15;class=T-Box                       |
| NOX4 NM_00<br>1143837 | TFB<br>S | TFBS | 213<br>8 | 21<br>45 | 1 | - | . | factors;sequence=AGG<br>TGTGA<br>TF=TBX1;class=T-Box                        |
| NOX4 NM_00<br>1143837 | TFB<br>S | TFBS | 213<br>8 | 21<br>45 | 1 | - | . | factors;sequence=AGG<br>TGTGA<br>TF=TBX4;class=T-Box                        |
| NOX4 NM_00<br>1143837 | TFB<br>S | TFBS | 213<br>8 | 21<br>45 | 1 | - | . | factors;sequence=AGG<br>TGTGA<br>TF=TBX5;class=T-Box                        |
| NOX4 NM_00<br>1143837 | TFB<br>S | TFBS | 213<br>8 | 21<br>45 | 1 | - | . | factors;sequence=AGG<br>TGTGA<br>TF=ZNF384;class=C2H2                       |
| NOX4 NM_00<br>1143837 | TFB<br>S | TFBS | 736      | 74<br>7  | 1 | + | . | zinc finger<br>factors;sequence=TTT<br>AAAAAAAAA<br>TF=NKX6-3;class=Home    |
| NOX4 NM_00<br>1143837 | TFB<br>S | TFBS | 716      | 72<br>4  | 1 | + | . | o domain<br>factors;sequence=CTC<br>ATTAAA<br>TF=ZNF460;class=C2H2          |
| NOX4 NM_00<br>1143837 | TFB<br>S | TFBS | 229<br>4 | 23<br>09 | 1 | - | . | zinc finger<br>factors;sequence=GCC<br>TCAGCCTCCCGAG<br>TF=PRDM1;class=C2H2 |
| NOX4 NM_00<br>1143837 | TFB<br>S | TFBS | 383      | 39<br>3  | 1 | - | . | zinc finger<br>factors;sequence=TTC<br>TTTCTCTT<br>TF=SHOX;class=Homeo      |
| NOX4 NM_00<br>1291929 | TFB<br>S | TFBS | 259      | 26<br>6  | 1 | + | . | domain<br>factors;sequence=TTA                                              |

|                   |      |      |     |    |   |   |   |                                                                                   |
|-------------------|------|------|-----|----|---|---|---|-----------------------------------------------------------------------------------|
| NOX4 NM_001291929 | TFBS | TFBS | 259 | 26 | 1 | - | . | ATTGG<br>TF=MSX2;class=Homeo domain<br>factors;sequence=CCAATTAA                  |
| NOX4 NM_001291929 | TFBS | TFBS | 259 | 26 | 1 | - | . | TF=RAX2;class=Homeo domain<br>factors;sequence=CCAATTAA                           |
| NOX4 NM_001291929 | TFBS | TFBS | 213 | 21 | 1 | - | . | TF=MGA;class=T-Box<br>factors;sequence=AGGTGTGA                                   |
| NOX4 NM_001291929 | TFBS | TFBS | 213 | 21 | 1 | - | . | TF=TBX15;class=T-Box<br>factors;sequence=AGGTGTGA                                 |
| NOX4 NM_001291929 | TFBS | TFBS | 213 | 21 | 1 | - | . | TF=TBX1;class=T-Box<br>factors;sequence=AGGTGTGA                                  |
| NOX4 NM_001291929 | TFBS | TFBS | 213 | 21 | 1 | - | . | TF=TBX4;class=T-Box<br>factors;sequence=AGGTGTGA                                  |
| NOX4 NM_001291929 | TFBS | TFBS | 213 | 21 | 1 | - | . | TF=TBX5;class=T-Box<br>factors;sequence=AGGTGTGA                                  |
| NOX4 NM_001291929 | TFBS | TFBS | 259 | 26 | 1 | - | . | TF=BSX;class=Homeo domain<br>factors;sequence=CCAATTAA                            |
| NOX4 NM_001291929 | TFBS | TFBS | 191 | 19 | 1 | + | . | TF=HOXC4;class=Homeo domain<br>factors;sequence=GTCATTAA                          |
| NOX4 NM_001291929 | TFBS | TFBS | 946 | 95 | 1 | + | . | TF=NR1I3;class=Nuclear receptors with C4 zinc<br>fingers;sequence=ATGAACTTT       |
| NOX4 NM_001291929 | TFBS | TFBS | 181 | 18 | 1 | + | . | TF=NR2C2(var.2);class=Nuclear receptors with C4 zinc<br>fingers;sequence=GAGGTCAT |
| NOX4 NM_001291929 | TFBS | TFBS | 229 | 23 | 1 | - | . | TF=ZNF460;class=C2H2 zinc finger                                                  |

|                   |      |      |      |      |   |   |   |                                                                                                                      |
|-------------------|------|------|------|------|---|---|---|----------------------------------------------------------------------------------------------------------------------|
| NOX4 NM_001291929 | TFBS | TFBS | 1870 | 1879 | 1 | - | . | factors;sequence=GCC TCAGCCTCCCGAG<br>TF=SOX4;class=High-mobility group (HMG) domain<br>factors;sequence=GAA CAAAGGG |
| NOX4 NM_001291927 | TFBS | TFBS | 477  | 484  | 1 | + | . | TF=SHOX;class=Homeo domain<br>factors;sequence=TTA ATTGG                                                             |
| NOX4 NM_001291927 | TFBS | TFBS | 477  | 484  | 1 | - | . | TF=MSX2;class=Homeo domain<br>factors;sequence=CCA ATTAA                                                             |
| NOX4 NM_001291927 | TFBS | TFBS | 477  | 484  | 1 | - | . | TF=RAX2;class=Homeo domain<br>factors;sequence=CCA ATTAA                                                             |
| NOX4 NM_001291927 | TFBS | TFBS | 2138 | 2145 | 1 | - | . | TF=MGA;class=T-Box factors;sequence=AGG TGTGA                                                                        |
| NOX4 NM_001291927 | TFBS | TFBS | 2138 | 2145 | 1 | - | . | TF=TBX15;class=T-Box factors;sequence=AGG TGTGA                                                                      |
| NOX4 NM_001291927 | TFBS | TFBS | 2138 | 2145 | 1 | - | . | TF=TBX1;class=T-Box factors;sequence=AGG TGTGA                                                                       |
| NOX4 NM_001291927 | TFBS | TFBS | 2138 | 2145 | 1 | - | . | TF=TBX4;class=T-Box factors;sequence=AGG TGTGA                                                                       |
| NOX4 NM_001291927 | TFBS | TFBS | 2138 | 2145 | 1 | - | . | TF=TBX5;class=T-Box factors;sequence=AGG TGTGA                                                                       |
| NOX4 NM_001291927 | TFBS | TFBS | 477  | 484  | 1 | - | . | TF=BSX;class=Homeo domain<br>factors;sequence=CCA ATTAA                                                              |
| NOX4 NM_001291927 | TFBS | TFBS | 1164 | 1172 | 1 | + | . | TF=NR1I3;class=Nuclear receptors with C4 zinc fingers;sequence=ATG AACTTT                                            |
| NOX4 NM_001291927 | TFBS | TFBS | 229  | 23   | 1 | - | . | TF=ZNF460;class=C2H2                                                                                                 |

|                       |          |      |          |          |   |   |   |                                                                               |
|-----------------------|----------|------|----------|----------|---|---|---|-------------------------------------------------------------------------------|
| 1291927               | S        |      | 4        | 09       |   |   |   | zinc finger<br>factors;sequence=GCC<br>TCAGCCTCCCGAG<br>TF=ZNF354C;class=C2H  |
| NOX4 NM_00<br>1291926 | TFB<br>S | TFBS | 211      | 21<br>6  | 1 | + | . | 2 zinc finger<br>factors;sequence=ATC<br>CAC<br>TF=SHOX;class=Homeo<br>domain |
| NOX4 NM_00<br>1291926 | TFB<br>S | TFBS | 874      | 88<br>1  | 1 | + | . | factors;sequence=TTA<br>ATTGG<br>TF=MSX2;class=Homeo<br>domain                |
| NOX4 NM_00<br>1291926 | TFB<br>S | TFBS | 874      | 88<br>1  | 1 | - | . | factors;sequence=CCA<br>ATTAA<br>TF=RAX2;class=Homeo<br>domain                |
| NOX4 NM_00<br>1291926 | TFB<br>S | TFBS | 874      | 88<br>1  | 1 | - | . | factors;sequence=CCA<br>ATTAA<br>TF=MGA;class=T-Box                           |
| NOX4 NM_00<br>1291926 | TFB<br>S | TFBS | 213<br>8 | 21<br>45 | 1 | - | . | factors;sequence=AGG<br>TGTGA<br>TF=TBX15;class=T-Box                         |
| NOX4 NM_00<br>1291926 | TFB<br>S | TFBS | 213<br>8 | 21<br>45 | 1 | - | . | factors;sequence=AGG<br>TGTGA<br>TF=TBX1;class=T-Box                          |
| NOX4 NM_00<br>1291926 | TFB<br>S | TFBS | 213<br>8 | 21<br>45 | 1 | - | . | factors;sequence=AGG<br>TGTGA<br>TF=TBX4;class=T-Box                          |
| NOX4 NM_00<br>1291926 | TFB<br>S | TFBS | 213<br>8 | 21<br>45 | 1 | - | . | factors;sequence=AGG<br>TGTGA<br>TF=TBX5;class=T-Box                          |
| NOX4 NM_00<br>1291926 | TFB<br>S | TFBS | 213<br>8 | 21<br>45 | 1 | - | . | factors;sequence=AGG<br>TGTGA<br>TF=BSX;class=Homeo<br>domain                 |
| NOX4 NM_00<br>1291926 | TFB<br>S | TFBS | 874      | 88<br>1  | 1 | - | . | factors;sequence=CCA<br>ATTAA<br>TF=NR1I3;class=Nucle<br>ar receptors with C4 |
| NOX4 NM_00<br>1291926 | TFB<br>S | TFBS | 156<br>1 | 15<br>69 | 1 | + | . | zinc<br>fingers;sequence=ATG<br>AACTTT                                        |
| NOX4 NM_00            | TFB      | TFBS | 229      | 23       | 1 | - | . | TF=ZNF460;class=C2H2                                                          |

|                    |          |      |          |          |   |   |   |  |                                                                                                                                                                                                                                                                                                                                                                                                                                                                                                                                                                                                                                                                                                                               |
|--------------------|----------|------|----------|----------|---|---|---|--|-------------------------------------------------------------------------------------------------------------------------------------------------------------------------------------------------------------------------------------------------------------------------------------------------------------------------------------------------------------------------------------------------------------------------------------------------------------------------------------------------------------------------------------------------------------------------------------------------------------------------------------------------------------------------------------------------------------------------------|
| 1291926            | S        |      | 4        | 09       |   |   |   |  | zinc finger<br>factors;sequence=GCC<br>TCAGCCTCCCGAG<br>TF=ZNF354C;class=C2H                                                                                                                                                                                                                                                                                                                                                                                                                                                                                                                                                                                                                                                  |
| NOX4 NM_01<br>6931 | TFB<br>S | TFBS | 211      | 21<br>6  | 1 | + | . |  | 2 zinc finger<br>factors;sequence=ATC<br>CAC<br>TF=SHOX;class=Homeo<br>domain<br>factors;sequence=TTA<br>ATTGG<br>TF=MSX2;class=Homeo<br>domain<br>factors;sequence=CCA<br>ATTAA<br>TF=RAX2;class=Homeo<br>domain<br>factors;sequence=CCA<br>ATTAA<br>TF=MGA;class=T-Box<br>factors;sequence=AGG<br>TGTGA<br>TF=TBX15;class=T-Box<br>factors;sequence=AGG<br>TGTGA<br>TF=TBX1;class=T-Box<br>factors;sequence=AGG<br>TGTGA<br>TF=TBX4;class=T-Box<br>factors;sequence=AGG<br>TGTGA<br>TF=TBX5;class=T-Box<br>factors;sequence=AGG<br>TGTGA<br>TF=BSX;class=Homeo<br>domain<br>factors;sequence=CCA<br>ATTAA<br>TF=NR1I3;class=Nucle<br>ar receptors with C4<br>zinc<br>fingers;sequence=ATG<br>AACTTT<br>TF=ZNF460;class=C2H2 |
| NOX4 NM_01<br>6931 | TFB<br>S | TFBS | 874      | 88<br>1  | 1 | + | . |  |                                                                                                                                                                                                                                                                                                                                                                                                                                                                                                                                                                                                                                                                                                                               |
| NOX4 NM_01<br>6931 | TFB<br>S | TFBS | 874      | 88<br>1  | 1 | - | . |  |                                                                                                                                                                                                                                                                                                                                                                                                                                                                                                                                                                                                                                                                                                                               |
| NOX4 NM_01<br>6931 | TFB<br>S | TFBS | 874      | 88<br>1  | 1 | - | . |  |                                                                                                                                                                                                                                                                                                                                                                                                                                                                                                                                                                                                                                                                                                                               |
| NOX4 NM_01<br>6931 | TFB<br>S | TFBS | 213<br>8 | 21<br>45 | 1 | - | . |  |                                                                                                                                                                                                                                                                                                                                                                                                                                                                                                                                                                                                                                                                                                                               |
| NOX4 NM_01<br>6931 | TFB<br>S | TFBS | 213<br>8 | 21<br>45 | 1 | - | . |  |                                                                                                                                                                                                                                                                                                                                                                                                                                                                                                                                                                                                                                                                                                                               |
| NOX4 NM_01<br>6931 | TFB<br>S | TFBS | 213<br>8 | 21<br>45 | 1 | - | . |  |                                                                                                                                                                                                                                                                                                                                                                                                                                                                                                                                                                                                                                                                                                                               |
| NOX4 NM_01<br>6931 | TFB<br>S | TFBS | 213<br>8 | 21<br>45 | 1 | - | . |  |                                                                                                                                                                                                                                                                                                                                                                                                                                                                                                                                                                                                                                                                                                                               |
| NOX4 NM_01<br>6931 | TFB<br>S | TFBS | 213<br>8 | 21<br>45 | 1 | - | . |  |                                                                                                                                                                                                                                                                                                                                                                                                                                                                                                                                                                                                                                                                                                                               |
| NOX4 NM_01<br>6931 | TFB<br>S | TFBS | 874      | 88<br>1  | 1 | - | . |  |                                                                                                                                                                                                                                                                                                                                                                                                                                                                                                                                                                                                                                                                                                                               |
| NOX4 NM_01<br>6931 | TFB<br>S | TFBS | 156<br>1 | 15<br>69 | 1 | + | . |  |                                                                                                                                                                                                                                                                                                                                                                                                                                                                                                                                                                                                                                                                                                                               |
| NOX4 NM_01         | TFB      | TFBS | 229      | 23       | 1 | - | . |  |                                                                                                                                                                                                                                                                                                                                                                                                                                                                                                                                                                                                                                                                                                                               |

|                       |          |      |          |          |   |   |   |                                                                               |
|-----------------------|----------|------|----------|----------|---|---|---|-------------------------------------------------------------------------------|
| 6931                  | S        |      | 4        | 09       |   |   |   | zinc finger<br>factors;sequence=GCC<br>TCAGCCTCCCGAG<br>TF=ZNF354C;class=C2H  |
| NOX4 NM_00<br>1143836 | TFB<br>S | TFBS | 211      | 21<br>6  | 1 | + | . | 2 zinc finger<br>factors;sequence=ATC<br>CAC<br>TF=SHOX;class=Homeo<br>domain |
| NOX4 NM_00<br>1143836 | TFB<br>S | TFBS | 874      | 88<br>1  | 1 | + | . | factors;sequence=TTA<br>ATTGG<br>TF=MSX2;class=Homeo<br>domain                |
| NOX4 NM_00<br>1143836 | TFB<br>S | TFBS | 874      | 88<br>1  | 1 | - | . | factors;sequence=CCA<br>ATTAA<br>TF=RAX2;class=Homeo<br>domain                |
| NOX4 NM_00<br>1143836 | TFB<br>S | TFBS | 874      | 88<br>1  | 1 | - | . | factors;sequence=CCA<br>ATTAA<br>TF=MGA;class=T-Box                           |
| NOX4 NM_00<br>1143836 | TFB<br>S | TFBS | 213<br>8 | 21<br>45 | 1 | - | . | factors;sequence=AGG<br>TGTGA<br>TF=TBX15;class=T-Box                         |
| NOX4 NM_00<br>1143836 | TFB<br>S | TFBS | 213<br>8 | 21<br>45 | 1 | - | . | factors;sequence=AGG<br>TGTGA<br>TF=TBX1;class=T-Box                          |
| NOX4 NM_00<br>1143836 | TFB<br>S | TFBS | 213<br>8 | 21<br>45 | 1 | - | . | factors;sequence=AGG<br>TGTGA<br>TF=TBX4;class=T-Box                          |
| NOX4 NM_00<br>1143836 | TFB<br>S | TFBS | 213<br>8 | 21<br>45 | 1 | - | . | factors;sequence=AGG<br>TGTGA<br>TF=TBX5;class=T-Box                          |
| NOX4 NM_00<br>1143836 | TFB<br>S | TFBS | 213<br>8 | 21<br>45 | 1 | - | . | factors;sequence=AGG<br>TGTGA<br>TF=BSX;class=Homeo<br>domain                 |
| NOX4 NM_00<br>1143836 | TFB<br>S | TFBS | 874      | 88<br>1  | 1 | - | . | factors;sequence=CCA<br>ATTAA<br>TF=NR1I3;class=Nucle<br>ar receptors with C4 |
| NOX4 NM_00<br>1143836 | TFB<br>S | TFBS | 156<br>1 | 15<br>69 | 1 | + | . | zinc<br>fingers;sequence=ATG<br>AACTTT                                        |
| NOX4 NM_00            | TFB      | TFBS | 229      | 23       | 1 | - | . | TF=ZNF460;class=C2H2                                                          |



|                       |          |      |          |          |                 |   |   |  |                                                                            |
|-----------------------|----------|------|----------|----------|-----------------|---|---|--|----------------------------------------------------------------------------|
| 1143836               | S        |      | 4        | 09       |                 |   |   |  | zinc finger factors;sequence=GCC TCAGCCTCCCGAG TF=ZNF354C;class=C2H        |
| NOX4 NR_12<br>0406    | TFB<br>S | TFBS | 211      | 21<br>6  | 1               | + | . |  | 2 zinc finger factors;sequence=ATC CAC TF=NFATC2;class=Rel                 |
| NOX4 NR_12<br>0406    | TFB<br>S | TFBS | 243<br>7 | 24<br>43 | 1               | - | . |  | homology region (RHR) factors;sequence=TTT TCCA TF=SHOX;class=Homeo        |
| NOX4 NR_12<br>0406    | TFB<br>S | TFBS | 874      | 88<br>1  | 1               | + | . |  | domain factors;sequence=TTA ATTGG TF=MSX2;class=Homeo                      |
| NOX4 NR_12<br>0406    | TFB<br>S | TFBS | 874      | 88<br>1  | 1               | - | . |  | domain factors;sequence=CCA ATTAA TF=RAX2;class=Homeo                      |
| NOX4 NR_12<br>0406    | TFB<br>S | TFBS | 874      | 88<br>1  | 1               | - | . |  | domain factors;sequence=CCA ATTAA TF=BSX;class=Homeo                       |
| NOX4 NR_12<br>0406    | TFB<br>S | TFBS | 874      | 88<br>1  | 1               | - | . |  | domain factors;sequence=CCA ATTAA TF=NR1I3;class=Nucle                     |
| NOX4 NR_12<br>0406    | TFB<br>S | TFBS | 156<br>1 | 15<br>69 | 1               | + | . |  | ar receptors with C4 zinc fingers;sequence=ATG AACTTT TF=NKX6-3;class=Home |
| NOX4 NM_00<br>1300995 | TFB<br>S | TFBS | 147      | 15<br>5  | 0.99995<br>4273 | + | . |  | o domain factors;sequence=GTC ATTAAA TF=RHOF1;class=Home                   |
| NOX4 NM_00<br>1143837 | TFB<br>S | TFBS | 510      | 51<br>7  | 0.99985<br>2312 | + | . |  | o domain factors;sequence=TTA ATCCC TF=HOXC4;class=Homeo                   |
| NOX4 NM_00<br>1300995 | TFB<br>S | TFBS | 169<br>7 | 17<br>04 | 0.99956<br>5985 | + | . |  | domain factors;sequence=ATC ATTAA                                          |

|                   |          |      |          |          |                 |   |   |                                                                 |
|-------------------|----------|------|----------|----------|-----------------|---|---|-----------------------------------------------------------------|
| NOX4 NM_001291929 | TFB<br>S | TFBS | 238      | 24<br>5  | 0.99956<br>5985 | + | . | TF=HOXC4;class=Homeo<br>domain<br>factors;sequence=ATC<br>ATTAA |
| NOX4 NM_001291927 | TFB<br>S | TFBS | 456      | 46<br>3  | 0.99956<br>5985 | + | . | TF=HOXC4;class=Homeo<br>domain<br>factors;sequence=ATC<br>ATTAA |
| NOX4 NM_001291926 | TFB<br>S | TFBS | 853      | 86<br>0  | 0.99956<br>5985 | + | . | TF=HOXC4;class=Homeo<br>domain<br>factors;sequence=ATC<br>ATTAA |
| NOX4 NM_016931    | TFB<br>S | TFBS | 853      | 86<br>0  | 0.99956<br>5985 | + | . | TF=HOXC4;class=Homeo<br>domain<br>factors;sequence=ATC<br>ATTAA |
| NOX4 NM_001143836 | TFB<br>S | TFBS | 853      | 86<br>0  | 0.99956<br>5985 | + | . | TF=HOXC4;class=Homeo<br>domain<br>factors;sequence=ATC<br>ATTAA |
| NOX4 NR_120406    | TFB<br>S | TFBS | 853      | 86<br>0  | 0.99956<br>5985 | + | . | TF=HOXC4;class=Homeo<br>domain<br>factors;sequence=ATC<br>ATTAA |
| NOX4 NM_001300995 | TFB<br>S | TFBS | 169<br>7 | 17<br>04 | 0.99933<br>1142 | + | . | TF=HOXD4;class=Homeo<br>domain<br>factors;sequence=ATC<br>ATTAA |
| NOX4 NM_001291929 | TFB<br>S | TFBS | 238      | 24<br>5  | 0.99933<br>1142 | + | . | TF=HOXD4;class=Homeo<br>domain<br>factors;sequence=ATC<br>ATTAA |
| NOX4 NM_001291927 | TFB<br>S | TFBS | 456      | 46<br>3  | 0.99933<br>1142 | + | . | TF=HOXD4;class=Homeo<br>domain<br>factors;sequence=ATC<br>ATTAA |
| NOX4 NM_001291926 | TFB<br>S | TFBS | 853      | 86<br>0  | 0.99933<br>1142 | + | . | TF=HOXD4;class=Homeo<br>domain<br>factors;sequence=ATC<br>ATTAA |
| NOX4 NM_016931    | TFB<br>S | TFBS | 853      | 86<br>0  | 0.99933<br>1142 | + | . | TF=HOXD4;class=Homeo<br>domain<br>factors;sequence=ATC<br>ATTAA |

|                   |          |      |          |          |                 |   |   |                                                                 |
|-------------------|----------|------|----------|----------|-----------------|---|---|-----------------------------------------------------------------|
| NOX4 NM_001143836 | TFB<br>S | TFBS | 853      | 86<br>0  | 0.99933<br>1142 | + | · | TF=HOXD4;class=Homeo<br>domain<br>factors;sequence=ATC<br>ATTAA |
| NOX4 NR_120406    | TFB<br>S | TFBS | 853      | 86<br>0  | 0.99933<br>1142 | + | · | TF=HOXD4;class=Homeo<br>domain<br>factors;sequence=ATC<br>ATTAA |
| NOX4 NM_001300995 | TFB<br>S | TFBS | 1        | 7        | 0.99912<br>7731 | - | · | TF=MEIS1;class=Homeo<br>domain<br>factors;sequence=ATG<br>ACAG  |
| NOX4 NM_001300995 | TFB<br>S | TFBS | 169<br>7 | 17<br>04 | 0.99905<br>3421 | + | · | TF=HOXB4;class=Homeo<br>domain<br>factors;sequence=ATC<br>ATTAA |
| NOX4 NM_001291929 | TFB<br>S | TFBS | 238      | 24<br>5  | 0.99905<br>3421 | + | · | TF=HOXB4;class=Homeo<br>domain<br>factors;sequence=ATC<br>ATTAA |
| NOX4 NM_001291927 | TFB<br>S | TFBS | 456      | 46<br>3  | 0.99905<br>3421 | + | · | TF=HOXB4;class=Homeo<br>domain<br>factors;sequence=ATC<br>ATTAA |
| NOX4 NM_001291926 | TFB<br>S | TFBS | 853      | 86<br>0  | 0.99905<br>3421 | + | · | TF=HOXB4;class=Homeo<br>domain<br>factors;sequence=ATC<br>ATTAA |
| NOX4 NM_0016931   | TFB<br>S | TFBS | 853      | 86<br>0  | 0.99905<br>3421 | + | · | TF=HOXB4;class=Homeo<br>domain<br>factors;sequence=ATC<br>ATTAA |
| NOX4 NM_001143836 | TFB<br>S | TFBS | 853      | 86<br>0  | 0.99905<br>3421 | + | · | TF=HOXB4;class=Homeo<br>domain<br>factors;sequence=ATC<br>ATTAA |
| NOX4 NR_120406    | TFB<br>S | TFBS | 853      | 86<br>0  | 0.99905<br>3421 | + | · | TF=HOXB4;class=Homeo<br>domain<br>factors;sequence=ATC<br>ATTAA |
| NOX4 NM_001300995 | TFB<br>S | TFBS | 746      | 75<br>3  | 0.99895<br>0001 | - | · | TF=ISX;class=Homeo<br>domain<br>factors;sequence=CCA<br>ATTAA   |

|                   |          |      |          |          |                 |   |   |                                                                                              |
|-------------------|----------|------|----------|----------|-----------------|---|---|----------------------------------------------------------------------------------------------|
| NOX4 NM_001300995 | TFB<br>S | TFBS | 171<br>8 | 17<br>25 | 0.99895<br>0001 | - | . | TF=ISX;class=Homeo<br>domain<br>factors;sequence=CCA<br>ATTAA                                |
| NOX4 NM_001291929 | TFB<br>S | TFBS | 259      | 26<br>6  | 0.99895<br>0001 | - | . | TF=ISX;class=Homeo<br>domain<br>factors;sequence=CCA<br>ATTAA                                |
| NOX4 NM_001291927 | TFB<br>S | TFBS | 477      | 48<br>4  | 0.99895<br>0001 | - | . | TF=ISX;class=Homeo<br>domain<br>factors;sequence=CCA<br>ATTAA                                |
| NOX4 NM_001291926 | TFB<br>S | TFBS | 874      | 88<br>1  | 0.99895<br>0001 | - | . | TF=ISX;class=Homeo<br>domain<br>factors;sequence=CCA<br>ATTAA                                |
| NOX4 NM_016931    | TFB<br>S | TFBS | 874      | 88<br>1  | 0.99895<br>0001 | - | . | TF=ISX;class=Homeo<br>domain<br>factors;sequence=CCA<br>ATTAA                                |
| NOX4 NM_001143836 | TFB<br>S | TFBS | 874      | 88<br>1  | 0.99895<br>0001 | - | . | TF=ISX;class=Homeo<br>domain<br>factors;sequence=CCA<br>ATTAA                                |
| NOX4 NR_120406    | TFB<br>S | TFBS | 874      | 88<br>1  | 0.99895<br>0001 | - | . | TF=ISX;class=Homeo<br>domain<br>factors;sequence=CCA<br>ATTAA                                |
| NOX4 NM_001143837 | TFB<br>S | TFBS | 115<br>8 | 11<br>65 | 0.99894<br>6347 | - | . | TF=RHOF1;class=Homeo<br>domain<br>factors;sequence=ATA<br>ATCCA                              |
| NOX4 NM_001143837 | TFB<br>S | TFBS | 135<br>0 | 13<br>57 | 0.99893<br>1566 | + | . | TF=NR2C2(var.2);clas<br>s=Nuclear receptors<br>with C4 zinc<br>fingers;sequence=GAG<br>GTCAC |
| NOX4 NM_001300995 | TFB<br>S | TFBS | 147      | 15<br>4  | 0.99888<br>8511 | + | . | TF=HOXD4;class=Homeo<br>domain<br>factors;sequence=GTC<br>ATTAA                              |
| NOX4 NM_001291929 | TFB<br>S | TFBS | 191<br>9 | 19<br>26 | 0.99888<br>8511 | + | . | TF=HOXD4;class=Homeo<br>domain<br>factors;sequence=GTC                                       |

|                   |          |      |          |          |                 |   |   |                                                                                        |
|-------------------|----------|------|----------|----------|-----------------|---|---|----------------------------------------------------------------------------------------|
| NOX4 NM_001143837 | TFB<br>S | TFBS | 510      | 51<br>7  | 0.99822<br>7995 | + | · | ATTAA<br>TF=PITX2;class=Homeo<br>domain<br>factors;sequence=TTA<br>ATCCC               |
| NOX4 NM_001143837 | TFB<br>S | TFBS | 134<br>9 | 13<br>57 | 0.99818<br>8349 | + | · | TF=NR2C1;class=Nucle<br>ar receptors with C4<br>zinc<br>fingers;sequence=AGA<br>GGTCAC |
| NOX4 NM_001300995 | TFB<br>S | TFBS | 147      | 15<br>4  | 0.99810<br>6843 | + | · | TF=HOXB4;class=Homeo<br>domain<br>factors;sequence=GTC<br>ATTAA                        |
| NOX4 NM_001291929 | TFB<br>S | TFBS | 191<br>9 | 19<br>26 | 0.99810<br>6843 | + | · | TF=HOXB4;class=Homeo<br>domain<br>factors;sequence=GTC<br>ATTAA                        |
| NOX4 NM_001143837 | TFB<br>S | TFBS | 185<br>2 | 18<br>59 | 0.99785<br>3614 | + | · | TF=TLX2;class=Homeo<br>domain<br>factors;sequence=TCA<br>ATTAG                         |
| NOX4 NM_001300995 | TFB<br>S | TFBS | 746      | 75<br>3  | 0.99735<br>684  | - | · | TF=MSX1;class=Homeo<br>domain<br>factors;sequence=CCA<br>ATTAA                         |
| NOX4 NM_001300995 | TFB<br>S | TFBS | 171<br>8 | 17<br>25 | 0.99735<br>684  | - | · | TF=MSX1;class=Homeo<br>domain<br>factors;sequence=CCA<br>ATTAA                         |
| NOX4 NM_001291929 | TFB<br>S | TFBS | 259      | 26<br>6  | 0.99735<br>684  | - | · | TF=MSX1;class=Homeo<br>domain<br>factors;sequence=CCA<br>ATTAA                         |
| NOX4 NM_001291927 | TFB<br>S | TFBS | 477      | 48<br>4  | 0.99735<br>684  | - | · | TF=MSX1;class=Homeo<br>domain<br>factors;sequence=CCA<br>ATTAA                         |
| NOX4 NM_001291926 | TFB<br>S | TFBS | 874      | 88<br>1  | 0.99735<br>684  | - | · | TF=MSX1;class=Homeo<br>domain<br>factors;sequence=CCA<br>ATTAA                         |
| NOX4 NM_016931    | TFB<br>S | TFBS | 874      | 88<br>1  | 0.99735<br>684  | - | · | TF=MSX1;class=Homeo<br>domain                                                          |

|                       |          |      |          |          |                 |   |   |                                                                                                                               |
|-----------------------|----------|------|----------|----------|-----------------|---|---|-------------------------------------------------------------------------------------------------------------------------------|
|                       |          |      |          |          |                 |   |   | factors;sequence=CCA<br>ATTAA<br>TF=MSX1;class=Homeo<br>domain                                                                |
| NOX4 NM_00<br>1143836 | TFB<br>S | TFBS | 874      | 88<br>1  | 0.99735<br>684  | - | . | factors;sequence=CCA<br>ATTAA<br>TF=MSX1;class=Homeo<br>domain                                                                |
| NOX4 NR_12<br>0406    | TFB<br>S | TFBS | 874      | 88<br>1  | 0.99735<br>684  | - | . | factors;sequence=CCA<br>ATTAA<br>TF=RBPJ;class=Rel<br>homology region (RHR)                                                   |
| NOX4 NM_00<br>1143837 | TFB<br>S | TFBS | 149<br>0 | 14<br>99 | 0.99727<br>8284 | + | . | factors;sequence=CCT<br>GGGAACG<br>TF=HOXD4;class=Homeo<br>domain                                                             |
| NOX4 NM_00<br>1143837 | TFB<br>S | TFBS | 131<br>6 | 13<br>23 | 0.99684<br>8455 | + | . | factors;sequence=ATA<br>ATTAG<br>TF=NR2C2(var.2);clas<br>s=Nuclear receptors<br>with C4 zinc<br>fingers;sequence=AGG<br>GTCAA |
| NOX4 NM_00<br>1291929 | TFB<br>S | TFBS | 139<br>5 | 14<br>02 | 0.99655<br>8046 | - | . | TF=NR2C2(var.2);clas<br>s=Nuclear receptors<br>with C4 zinc<br>fingers;sequence=AGG<br>GTCAA                                  |
| NOX4 NM_00<br>1291927 | TFB<br>S | TFBS | 161<br>3 | 16<br>20 | 0.99655<br>8046 | - | . | TF=CREB1;class=Basic<br>leucine zipper<br>factors<br>(bZIP);sequence=TGGT<br>GATGTCATT                                        |
| NOX4 NM_00<br>1291929 | TFB<br>S | TFBS | 191<br>2 | 19<br>24 | 0.99648<br>563  | + | . | TF=NR2C1;class=Nucle<br>ar receptors with C4<br>zinc<br>fingers;sequence=AGA<br>GGTCAT                                        |
| NOX4 NM_00<br>1300995 | TFB<br>S | TFBS | 181<br>5 | 18<br>23 | 0.99639<br>3595 | + | . | TF=FOXL1;class=Fork<br>head / winged helix<br>factors;sequence=ATA<br>AACA                                                    |
| NOX4 NM_00<br>1300995 | TFB<br>S | TFBS | 154<br>3 | 15<br>49 | 0.99630<br>5873 | + | . | TF=FOXL1;class=Fork<br>head / winged helix                                                                                    |

|                       |          |      |          |          |                 |   |   |                                                                                                            |
|-----------------------|----------|------|----------|----------|-----------------|---|---|------------------------------------------------------------------------------------------------------------|
|                       |          |      |          |          |                 |   |   | factors;sequence=ATA<br>AACA<br>TF=FOXL1;class=Fork<br>head / winged helix<br>factors;sequence=ATA<br>AACA |
| NOX4 NM_00<br>1143837 | TFB<br>S | TFBS | 289      | 29<br>5  | 0.99630<br>5873 | - | . | TF=FOXL1;class=Fork<br>head / winged helix<br>factors;sequence=ATA<br>AACA                                 |
| NOX4 NM_00<br>1291929 | TFB<br>S | TFBS | 84       | 90       | 0.99630<br>5873 | + | . | TF=FOXL1;class=Fork<br>head / winged helix<br>factors;sequence=ATA<br>AACA                                 |
| NOX4 NM_00<br>1291927 | TFB<br>S | TFBS | 302      | 30<br>8  | 0.99630<br>5873 | + | . | TF=FOXL1;class=Fork<br>head / winged helix<br>factors;sequence=ATA<br>AACA                                 |
| NOX4 NM_00<br>1291926 | TFB<br>S | TFBS | 699      | 70<br>5  | 0.99630<br>5873 | + | . | TF=FOXL1;class=Fork<br>head / winged helix<br>factors;sequence=ATA<br>AACA                                 |
| NOX4 NM_01<br>6931    | TFB<br>S | TFBS | 699      | 70<br>5  | 0.99630<br>5873 | + | . | TF=FOXL1;class=Fork<br>head / winged helix<br>factors;sequence=ATA<br>AACA                                 |
| NOX4 NM_00<br>1143836 | TFB<br>S | TFBS | 699      | 70<br>5  | 0.99630<br>5873 | + | . | TF=FOXL1;class=Fork<br>head / winged helix<br>factors;sequence=ATA<br>AACA                                 |
| NOX4 NR_12<br>0406    | TFB<br>S | TFBS | 699      | 70<br>5  | 0.99630<br>5873 | + | . | TF=FOXL1;class=Fork<br>head / winged helix<br>factors;sequence=ATA<br>AACA                                 |
| NOX4 NM_00<br>1300995 | TFB<br>S | TFBS | 177<br>8 | 17<br>85 | 0.99617<br>9597 | - | . | TF=HOXD4;class=Homeo<br>domain<br>factors;sequence=ATA<br>ATTAA                                            |
| NOX4 NM_00<br>1143837 | TFB<br>S | TFBS | 182<br>8 | 18<br>35 | 0.99617<br>9597 | - | . | TF=HOXD4;class=Homeo<br>domain<br>factors;sequence=ATA<br>ATTAA                                            |
| NOX4 NM_00<br>1291929 | TFB<br>S | TFBS | 319      | 32<br>6  | 0.99617<br>9597 | - | . | TF=HOXD4;class=Homeo<br>domain<br>factors;sequence=ATA<br>ATTAA                                            |
| NOX4 NM_00<br>1291927 | TFB<br>S | TFBS | 537      | 54<br>4  | 0.99617<br>9597 | - | . | TF=HOXD4;class=Homeo<br>domain                                                                             |

|                       |          |      |          |          |                 |   |   |                                                                 |
|-----------------------|----------|------|----------|----------|-----------------|---|---|-----------------------------------------------------------------|
|                       |          |      |          |          |                 |   |   | factors;sequence=ATA<br>ATTAA<br>TF=HOXD4;class=Homeo<br>domain |
| NOX4 NM_00<br>1291926 | TFB<br>S | TFBS | 934      | 94<br>1  | 0.99617<br>9597 | — | · | factors;sequence=ATA<br>ATTAA<br>TF=HOXD4;class=Homeo<br>domain |
| NOX4 NM_01<br>6931    | TFB<br>S | TFBS | 934      | 94<br>1  | 0.99617<br>9597 | — | · | factors;sequence=ATA<br>ATTAA<br>TF=HOXD4;class=Homeo<br>domain |
| NOX4 NM_00<br>1143836 | TFB<br>S | TFBS | 934      | 94<br>1  | 0.99617<br>9597 | — | · | factors;sequence=ATA<br>ATTAA<br>TF=HOXD4;class=Homeo<br>domain |
| NOX4 NR_12<br>0406    | TFB<br>S | TFBS | 934      | 94<br>1  | 0.99617<br>9597 | — | · | factors;sequence=ATA<br>ATTAA<br>TF=HOXD4;class=Homeo<br>domain |
| NOX4 NM_00<br>1300995 | TFB<br>S | TFBS | 746      | 75<br>3  | 0.99571<br>388  | — | · | factors;sequence=CCA<br>ATTAA<br>TF=PRRX1;class=Homeo<br>domain |
| NOX4 NM_00<br>1300995 | TFB<br>S | TFBS | 171<br>8 | 17<br>25 | 0.99571<br>388  | — | · | factors;sequence=CCA<br>ATTAA<br>TF=PRRX1;class=Homeo<br>domain |
| NOX4 NM_00<br>1291929 | TFB<br>S | TFBS | 259      | 26<br>6  | 0.99571<br>388  | — | · | factors;sequence=CCA<br>ATTAA<br>TF=PRRX1;class=Homeo<br>domain |
| NOX4 NM_00<br>1291927 | TFB<br>S | TFBS | 477      | 48<br>4  | 0.99571<br>388  | — | · | factors;sequence=CCA<br>ATTAA<br>TF=PRRX1;class=Homeo<br>domain |
| NOX4 NM_00<br>1291926 | TFB<br>S | TFBS | 874      | 88<br>1  | 0.99571<br>388  | — | · | factors;sequence=CCA<br>ATTAA<br>TF=PRRX1;class=Homeo<br>domain |
| NOX4 NM_01<br>6931    | TFB<br>S | TFBS | 874      | 88<br>1  | 0.99571<br>388  | — | · | factors;sequence=CCA<br>ATTAA<br>TF=PRRX1;class=Homeo<br>domain |
| NOX4 NM_00<br>1143836 | TFB<br>S | TFBS | 874      | 88<br>1  | 0.99571<br>388  | — | · | factors;sequence=CCA<br>ATTAA<br>TF=PRRX1;class=Homeo<br>domain |



|                   |      |      |      |      |             |   |   |                                                                   |
|-------------------|------|------|------|------|-------------|---|---|-------------------------------------------------------------------|
| NOX4 NR_120406    | TFBS | TFBS | 874  | 881  | 0.99571388  | - | . | TF=PRRX1;class=Homeodomain<br>factors;sequence=CCATTAA            |
| NOX4 NM_001300995 | TFBS | TFBS | 746  | 753  | 0.995684226 | - | . | TF=DLX6;class=Homeodomain<br>factors;sequence=CCATTAA             |
| NOX4 NM_001300995 | TFBS | TFBS | 1718 | 1725 | 0.995684226 | - | . | TF=DLX6;class=Homeodomain<br>factors;sequence=CCATTAA             |
| NOX4 NM_001291929 | TFBS | TFBS | 259  | 266  | 0.995684226 | - | . | TF=DLX6;class=Homeodomain<br>factors;sequence=CCATTAA             |
| NOX4 NM_001291927 | TFBS | TFBS | 477  | 484  | 0.995684226 | - | . | TF=DLX6;class=Homeodomain<br>factors;sequence=CCATTAA             |
| NOX4 NM_001291926 | TFBS | TFBS | 874  | 881  | 0.995684226 | - | . | TF=DLX6;class=Homeodomain<br>factors;sequence=CCATTAA             |
| NOX4 NM_0016931   | TFBS | TFBS | 874  | 881  | 0.995684226 | - | . | TF=DLX6;class=Homeodomain<br>factors;sequence=CCATTAA             |
| NOX4 NM_001143836 | TFBS | TFBS | 874  | 881  | 0.995684226 | - | . | TF=DLX6;class=Homeodomain<br>factors;sequence=CCATTAA             |
| NOX4 NR_120406    | TFBS | TFBS | 874  | 881  | 0.995684226 | - | . | TF=DLX6;class=Homeodomain<br>factors;sequence=CCATTAA             |
| NOX4 NM_001143837 | TFBS | TFBS | 1327 | 1336 | 0.995411894 | + | . | TF=POU6F1(var.2);class=Homeodomain<br>factors;sequence=ATGATGAGGA |
| NOX4 NM_001300995 | TFBS | TFBS | 147  | 154  | 0.9953249   | + | . | TF=HOXA4;class=Homeodomain                                        |

|                       |          |      |          |          |                 |   |   |                                                                                                                               |
|-----------------------|----------|------|----------|----------|-----------------|---|---|-------------------------------------------------------------------------------------------------------------------------------|
|                       |          |      |          |          |                 |   |   | factors;sequence=GTC<br>ATTAA<br>TF=HOXA4;class=Homeo<br>domain                                                               |
| NOX4 NM_00<br>1291929 | TFB<br>S | TFBS | 191<br>9 | 19<br>26 | 0.99532<br>49   | + | . | factors;sequence=GTC<br>ATTAA<br>TF=TEAD3;class=TEA<br>domain                                                                 |
| NOX4 NM_00<br>1300995 | TFB<br>S | TFBS | 692      | 69<br>9  | 0.99531<br>1515 | + | . | factors;sequence=GCA<br>TTCCA<br>TF=NR2C2(var.2);clas<br>s=Nuclear receptors<br>with C4 zinc<br>fingers;sequence=GAG<br>GTCAG |
| NOX4 NM_00<br>1300995 | TFB<br>S | TFBS | 232      | 23<br>9  | 0.99523<br>7296 | + | . | TF=NR2C2(var.2);clas<br>s=Nuclear receptors<br>with C4 zinc<br>fingers;sequence=GAG<br>GTCAG                                  |
| NOX4 NM_00<br>1300995 | TFB<br>S | TFBS | 218<br>8 | 21<br>95 | 0.99523<br>7296 | + | . | TF=NR2C2(var.2);clas<br>s=Nuclear receptors<br>with C4 zinc<br>fingers;sequence=GAG<br>GTCAG                                  |
| NOX4 NM_00<br>1143837 | TFB<br>S | TFBS | 218<br>8 | 21<br>95 | 0.99523<br>7296 | + | . | TF=NR2C2(var.2);clas<br>s=Nuclear receptors<br>with C4 zinc<br>fingers;sequence=GAG<br>GTCAG                                  |
| NOX4 NM_00<br>1291929 | TFB<br>S | TFBS | 218<br>8 | 21<br>95 | 0.99523<br>7296 | + | . | TF=NR2C2(var.2);clas<br>s=Nuclear receptors<br>with C4 zinc<br>fingers;sequence=GAG<br>GTCAG                                  |
| NOX4 NM_00<br>1291927 | TFB<br>S | TFBS | 218<br>8 | 21<br>95 | 0.99523<br>7296 | + | . | TF=NR2C2(var.2);clas<br>s=Nuclear receptors<br>with C4 zinc<br>fingers;sequence=GAG<br>GTCAG                                  |
| NOX4 NM_00<br>1291926 | TFB<br>S | TFBS | 218<br>8 | 21<br>95 | 0.99523<br>7296 | + | . | TF=NR2C2(var.2);clas<br>s=Nuclear receptors<br>with C4 zinc<br>fingers;sequence=GAG<br>GTCAG                                  |
| NOX4 NM_01<br>6931    | TFB<br>S | TFBS | 218<br>8 | 21<br>95 | 0.99523<br>7296 | + | . | TF=NR2C2(var.2);clas<br>s=Nuclear receptors<br>with C4 zinc<br>fingers;sequence=GAG                                           |

|                   |          |      |          |          |                 |   |   |                                                                                          |
|-------------------|----------|------|----------|----------|-----------------|---|---|------------------------------------------------------------------------------------------|
| NOX4 NM_001143836 | TFB<br>S | TFBS | 218<br>8 | 21<br>95 | 0.99523<br>7296 | + | . | GTCAG<br>TF=NR2C2(var.2);class=Nuclear receptors with C4 zinc fingers;sequence=GAG GTCAG |
| NOX4 NM_001300995 | TFB<br>S | TFBS | 311      | 31<br>9  | 0.99511<br>3409 | - | . | TF=NFIX;class=SMAD/NF-1 DNA-binding domain factors;sequence=TGT GCCAAC                   |
| NOX4 NM_001143837 | TFB<br>S | TFBS | 156<br>6 | 15<br>72 | 0.99498<br>9704 | + | . | TF=MEIS1;class=Homeo domain factors;sequence=CTG ACAG                                    |
| NOX4 NM_001291929 | TFB<br>S | TFBS | 828      | 83<br>4  | 0.99498<br>9704 | - | . | TF=MEIS1;class=Homeo domain factors;sequence=CTG ACAG                                    |
| NOX4 NM_001291927 | TFB<br>S | TFBS | 104<br>6 | 10<br>52 | 0.99498<br>9704 | - | . | TF=MEIS1;class=Homeo domain factors;sequence=CTG ACAG                                    |
| NOX4 NM_001291926 | TFB<br>S | TFBS | 144<br>3 | 14<br>49 | 0.99498<br>9704 | - | . | TF=MEIS1;class=Homeo domain factors;sequence=CTG ACAG                                    |
| NOX4 NM_0016931   | TFB<br>S | TFBS | 144<br>3 | 14<br>49 | 0.99498<br>9704 | - | . | TF=MEIS1;class=Homeo domain factors;sequence=CTG ACAG                                    |
| NOX4 NM_001143836 | TFB<br>S | TFBS | 144<br>3 | 14<br>49 | 0.99498<br>9704 | - | . | TF=MEIS1;class=Homeo domain factors;sequence=CTG ACAG                                    |
| NOX4 NR_120406    | TFB<br>S | TFBS | 144<br>3 | 14<br>49 | 0.99498<br>9704 | - | . | TF=MEIS1;class=Homeo domain factors;sequence=CTG ACAG                                    |
| NOX4 NM_001143837 | TFB<br>S | TFBS | 737      | 74<br>8  | 0.99491<br>4257 | + | . | TF=ZNF384;class=C2H2 zinc finger factors;sequence=TTA AAAAAAAAAA                         |
| NOX4 NM_001143837 | TFB<br>S | TFBS | 738      | 74       | 0.99483         | + | . | TF=ZNF384;class=C2H2                                                                     |

|                       |          |      |          |          |                 |   |   |                                                                          |
|-----------------------|----------|------|----------|----------|-----------------|---|---|--------------------------------------------------------------------------|
| 1143837               | S        |      |          | 9        | 2864            |   |   | zinc finger<br>factors;sequence=TAA<br>AAAAAAAAA<br>TF=ZNF384;class=C2H2 |
| NOX4 NM_00<br>1143837 | TFB<br>S | TFBS | 485      | 49<br>6  | 0.99483<br>2864 | - | . | zinc finger<br>factors;sequence=TAA<br>AAAAAAAAA<br>TF=ZNF384;class=C2H2 |
| NOX4 NM_00<br>1143837 | TFB<br>S | TFBS | 586      | 59<br>7  | 0.99483<br>2864 | - | . | zinc finger<br>factors;sequence=TAA<br>AAAAAAAAA<br>TF=PITX1;class=Homeo |
| NOX4 NM_00<br>1143837 | TFB<br>S | TFBS | 510      | 51<br>7  | 0.99477<br>8353 | + | . | domain<br>factors;sequence=TTA<br>ATCCC<br>TF=HOXC4;class=Homeo          |
| NOX4 NM_00<br>1300995 | TFB<br>S | TFBS | 177<br>8 | 17<br>85 | 0.99407<br>1307 | - | . | domain<br>factors;sequence=ATA<br>ATTAA<br>TF=HOXC4;class=Homeo          |
| NOX4 NM_00<br>1143837 | TFB<br>S | TFBS | 182<br>8 | 18<br>35 | 0.99407<br>1307 | - | . | domain<br>factors;sequence=ATA<br>ATTAA<br>TF=HOXC4;class=Homeo          |
| NOX4 NM_00<br>1291929 | TFB<br>S | TFBS | 319      | 32<br>6  | 0.99407<br>1307 | - | . | domain<br>factors;sequence=ATA<br>ATTAA<br>TF=HOXC4;class=Homeo          |
| NOX4 NM_00<br>1291927 | TFB<br>S | TFBS | 537      | 54<br>4  | 0.99407<br>1307 | - | . | domain<br>factors;sequence=ATA<br>ATTAA<br>TF=HOXC4;class=Homeo          |
| NOX4 NM_00<br>1291926 | TFB<br>S | TFBS | 934      | 94<br>1  | 0.99407<br>1307 | - | . | domain<br>factors;sequence=ATA<br>ATTAA<br>TF=HOXC4;class=Homeo          |
| NOX4 NM_01<br>6931    | TFB<br>S | TFBS | 934      | 94<br>1  | 0.99407<br>1307 | - | . | domain<br>factors;sequence=ATA<br>ATTAA<br>TF=HOXC4;class=Homeo          |
| NOX4 NM_00<br>1143836 | TFB<br>S | TFBS | 934      | 94<br>1  | 0.99407<br>1307 | - | . | domain<br>factors;sequence=ATA<br>ATTAA<br>TF=HOXC4;class=Homeo          |
| NOX4 NR_12            | TFB      | TFBS | 934      | 94       | 0.99407         | - | . | TF=HOXC4;class=Homeo                                                     |

|                       |          |      |          |          |                 |   |   |                                                                                  |
|-----------------------|----------|------|----------|----------|-----------------|---|---|----------------------------------------------------------------------------------|
| 0406                  | S        |      |          | 1        | 1307            |   |   | domain<br>factors;sequence=ATA<br>ATTAA<br>TF=ZNF354C;class=C2H<br>2 zinc finger |
| NOX4 NM_00<br>1300995 | TFB<br>S | TFBS | 383      | 38<br>8  | 0.99404<br>8003 | - | . | factors;sequence=CTC<br>CAC<br>TF=ZNF354C;class=C2H<br>2 zinc finger             |
| NOX4 NM_00<br>1300995 | TFB<br>S | TFBS | 146<br>0 | 14<br>65 | 0.99404<br>8003 | - | . | factors;sequence=CTC<br>CAC<br>TF=ZNF354C;class=C2H<br>2 zinc finger             |
| NOX4 NM_00<br>1291929 | TFB<br>S | TFBS | 565      | 57<br>0  | 0.99404<br>8003 | + | . | factors;sequence=CTC<br>CAC<br>TF=ZNF354C;class=C2H<br>2 zinc finger             |
| NOX4 NM_00<br>1291929 | TFB<br>S | TFBS | 1        | 6        | 0.99404<br>8003 | - | . | factors;sequence=CTC<br>CAC<br>TF=ZNF354C;class=C2H<br>2 zinc finger             |
| NOX4 NM_00<br>1291929 | TFB<br>S | TFBS | 180<br>0 | 18<br>05 | 0.99404<br>8003 | - | . | factors;sequence=CTC<br>CAC<br>TF=ZNF354C;class=C2H<br>2 zinc finger             |
| NOX4 NM_00<br>1291927 | TFB<br>S | TFBS | 783      | 78<br>8  | 0.99404<br>8003 | + | . | factors;sequence=CTC<br>CAC<br>TF=ZNF354C;class=C2H<br>2 zinc finger             |
| NOX4 NM_00<br>1291927 | TFB<br>S | TFBS | 219      | 22<br>4  | 0.99404<br>8003 | - | . | factors;sequence=CTC<br>CAC<br>TF=ZNF354C;class=C2H<br>2 zinc finger             |
| NOX4 NM_00<br>1291926 | TFB<br>S | TFBS | 118<br>0 | 11<br>85 | 0.99404<br>8003 | + | . | factors;sequence=CTC<br>CAC<br>TF=ZNF354C;class=C2H<br>2 zinc finger             |
| NOX4 NM_00<br>1291926 | TFB<br>S | TFBS | 616      | 62<br>1  | 0.99404<br>8003 | - | . | factors;sequence=CTC<br>CAC<br>TF=ZNF354C;class=C2H<br>2 zinc finger             |
| NOX4 NM_01<br>6931    | TFB<br>S | TFBS | 118<br>0 | 11<br>85 | 0.99404<br>8003 | + | . | factors;sequence=CTC<br>CAC<br>TF=ZNF354C;class=C2H<br>2 zinc finger             |
| NOX4 NM_01            | TFB      | TFBS | 616      | 62       | 0.99404         | - | . | TF=ZNF354C;class=C2H                                                             |

|                       |          |      |          |          |                 |   |   |                                                                                                                                                                              |
|-----------------------|----------|------|----------|----------|-----------------|---|---|------------------------------------------------------------------------------------------------------------------------------------------------------------------------------|
| 6931                  | S        |      |          | 1        | 8003            |   |   | 2 zinc finger<br>factors;sequence=CTC<br>CAC<br>TF=ZNF354C;class=C2H                                                                                                         |
| NOX4 NM_00<br>1143836 | TFB<br>S | TFBS | 118<br>0 | 11<br>85 | 0.99404<br>8003 | + | . | 2 zinc finger<br>factors;sequence=CTC<br>CAC<br>TF=ZNF354C;class=C2H                                                                                                         |
| NOX4 NM_00<br>1143836 | TFB<br>S | TFBS | 616      | 62<br>1  | 0.99404<br>8003 | - | . | 2 zinc finger<br>factors;sequence=CTC<br>CAC<br>TF=ZNF354C;class=C2H                                                                                                         |
| NOX4 NR_12<br>0406    | TFB<br>S | TFBS | 118<br>0 | 11<br>85 | 0.99404<br>8003 | + | . | 2 zinc finger<br>factors;sequence=CTC<br>CAC<br>TF=ZNF354C;class=C2H                                                                                                         |
| NOX4 NR_12<br>0406    | TFB<br>S | TFBS | 616      | 62<br>1  | 0.99404<br>8003 | - | . | 2 zinc finger<br>factors;sequence=CTC<br>CAC<br>TF=ZNF354C;class=C2H                                                                                                         |
| NOX4 NM_00<br>1300995 | TFB<br>S | TFBS | 314      | 32<br>3  | 0.99393<br>8771 | + | . | TF=MXI1;class=Basic<br>helix-loop-helix<br>factors<br>(bHLH);sequence=GGCA<br>CATGCC<br>TF=MXI1;class=Basic<br>helix-loop-helix<br>factors<br>(bHLH);sequence=GGCA<br>CATGCC |
| NOX4 NM_00<br>1143837 | TFB<br>S | TFBS | 165<br>7 | 16<br>66 | 0.99393<br>8771 | + | . | TF=HOXB4;class=Homeo<br>domain<br>factors;sequence=ATA<br>ATTAG<br>TF=ZNF384;class=C2H2                                                                                      |
| NOX4 NM_00<br>1143837 | TFB<br>S | TFBS | 588      | 59<br>9  | 0.99381<br>0188 | - | . | zinc finger<br>factors;sequence=ACT<br>AAAAAAAAA<br>TF=PITX2;class=Homeo<br>domain                                                                                           |
| NOX4 NM_00<br>1300995 | TFB<br>S | TFBS | 190      | 19<br>7  | 0.99371<br>8358 | + | . | factors;sequence=GTA<br>ATCCC<br>TF=PITX2;class=Homeo<br>domain                                                                                                              |
| NOX4 NM_00<br>1300995 | TFB<br>S | TFBS | 214<br>6 | 21<br>53 | 0.99371<br>8358 | + | . | factors;sequence=GTA                                                                                                                                                         |

|                   |          |      |          |          |                 |   |   |                                                                          |
|-------------------|----------|------|----------|----------|-----------------|---|---|--------------------------------------------------------------------------|
| NOX4 NM_001300995 | TFB<br>S | TFBS | 108<br>4 | 10<br>91 | 0.99371<br>8358 | - | . | ATCCC<br>TF=PITX2;class=Homeo<br>domain<br>factors;sequence=GTA<br>ATCCC |
| NOX4 NM_001143837 | TFB<br>S | TFBS | 214<br>6 | 21<br>53 | 0.99371<br>8358 | + | . | TF=PITX2;class=Homeo<br>domain<br>factors;sequence=GTA<br>ATCCC          |
| NOX4 NM_001291929 | TFB<br>S | TFBS | 214<br>6 | 21<br>53 | 0.99371<br>8358 | + | . | TF=PITX2;class=Homeo<br>domain<br>factors;sequence=GTA<br>ATCCC          |
| NOX4 NM_001291927 | TFB<br>S | TFBS | 214<br>6 | 21<br>53 | 0.99371<br>8358 | + | . | TF=PITX2;class=Homeo<br>domain<br>factors;sequence=GTA<br>ATCCC          |
| NOX4 NM_001291926 | TFB<br>S | TFBS | 214<br>6 | 21<br>53 | 0.99371<br>8358 | + | . | TF=PITX2;class=Homeo<br>domain<br>factors;sequence=GTA<br>ATCCC          |
| NOX4 NM_001291926 | TFB<br>S | TFBS | 240      | 24<br>7  | 0.99371<br>8358 | - | . | TF=PITX2;class=Homeo<br>domain<br>factors;sequence=GTA<br>ATCCC          |
| NOX4 NM_016931    | TFB<br>S | TFBS | 214<br>6 | 21<br>53 | 0.99371<br>8358 | + | . | TF=PITX2;class=Homeo<br>domain<br>factors;sequence=GTA<br>ATCCC          |
| NOX4 NM_016931    | TFB<br>S | TFBS | 240      | 24<br>7  | 0.99371<br>8358 | - | . | TF=PITX2;class=Homeo<br>domain<br>factors;sequence=GTA<br>ATCCC          |
| NOX4 NM_001143836 | TFB<br>S | TFBS | 214<br>6 | 21<br>53 | 0.99371<br>8358 | + | . | TF=PITX2;class=Homeo<br>domain<br>factors;sequence=GTA<br>ATCCC          |
| NOX4 NM_001143836 | TFB<br>S | TFBS | 240      | 24<br>7  | 0.99371<br>8358 | - | . | TF=PITX2;class=Homeo<br>domain<br>factors;sequence=GTA<br>ATCCC          |
| NOX4 NR_120406    | TFB<br>S | TFBS | 240      | 24<br>7  | 0.99371<br>8358 | - | . | TF=PITX2;class=Homeo<br>domain<br>factors;sequence=GTA                   |

|                   |          |      |          |          |                 |   |   |                                                                          |
|-------------------|----------|------|----------|----------|-----------------|---|---|--------------------------------------------------------------------------|
| NOX4 NM_001143837 | TFB<br>S | TFBS | 131<br>6 | 13<br>23 | 0.99371<br>7508 | + | · | ATCCC<br>TF=HOXC4;class=Homeo<br>domain<br>factors;sequence=ATA<br>ATTAG |
| NOX4 NM_001300995 | TFB<br>S | TFBS | 536      | 54<br>3  | 0.99370<br>4332 | + | · | TF=HOXC4;class=Homeo<br>domain<br>factors;sequence=CTC<br>ATTAA          |
| NOX4 NM_001300995 | TFB<br>S | TFBS | 540      | 54<br>7  | 0.99370<br>4332 | - | · | TF=HOXC4;class=Homeo<br>domain<br>factors;sequence=CTC<br>ATTAA          |
| NOX4 NM_001143837 | TFB<br>S | TFBS | 716      | 72<br>3  | 0.99370<br>4332 | + | · | TF=HOXC4;class=Homeo<br>domain<br>factors;sequence=CTC<br>ATTAA          |
| NOX4 NR_120406    | TFB<br>S | TFBS | 232<br>5 | 23<br>32 | 0.99370<br>4332 | + | · | TF=HOXC4;class=Homeo<br>domain<br>factors;sequence=CTC<br>ATTAA          |
| NOX4 NM_001300995 | TFB<br>S | TFBS | 187<br>1 | 18<br>78 | 0.99335<br>0533 | + | · | TF=HOXC4;class=Homeo<br>domain<br>factors;sequence=CTC<br>ATTAG          |
| NOX4 NM_001291929 | TFB<br>S | TFBS | 412      | 41<br>9  | 0.99335<br>0533 | + | · | TF=HOXC4;class=Homeo<br>domain<br>factors;sequence=CTC<br>ATTAG          |
| NOX4 NM_001291927 | TFB<br>S | TFBS | 630      | 63<br>7  | 0.99335<br>0533 | + | · | TF=HOXC4;class=Homeo<br>domain<br>factors;sequence=CTC<br>ATTAG          |
| NOX4 NM_001291926 | TFB<br>S | TFBS | 102<br>7 | 10<br>34 | 0.99335<br>0533 | + | · | TF=HOXC4;class=Homeo<br>domain<br>factors;sequence=CTC<br>ATTAG          |
| NOX4 NM_016931    | TFB<br>S | TFBS | 102<br>7 | 10<br>34 | 0.99335<br>0533 | + | · | TF=HOXC4;class=Homeo<br>domain<br>factors;sequence=CTC<br>ATTAG          |
| NOX4 NM_001143836 | TFB<br>S | TFBS | 102<br>7 | 10<br>34 | 0.99335<br>0533 | + | · | TF=HOXC4;class=Homeo<br>domain<br>factors;sequence=CTC                   |



|                       |          |      |          |          |                 |   |   |                                                                                                                                                                                                                                                                                                                                                                                                                                                                                                                                                                                                                                                                                                                                                                                                   |
|-----------------------|----------|------|----------|----------|-----------------|---|---|---------------------------------------------------------------------------------------------------------------------------------------------------------------------------------------------------------------------------------------------------------------------------------------------------------------------------------------------------------------------------------------------------------------------------------------------------------------------------------------------------------------------------------------------------------------------------------------------------------------------------------------------------------------------------------------------------------------------------------------------------------------------------------------------------|
| NOX4 NR_12<br>0406    | TFB<br>S | TFBS | 102<br>7 | 10<br>34 | 0.99335<br>0533 | + | . | ATTAG<br>TF=HOXC4;class=Homeo<br>domain<br>factors;sequence=CTC<br>ATTAG<br>TF=SRY;class=High-mo<br>bility group (HMG)<br>domain<br>factors;sequence=TTA<br>ACAAT<br>TF=ZNF384;class=C2H2<br>zinc finger<br>factors;sequence=AAA<br>AAAAAAAAA<br>TF=ZNF384;class=C2H2<br>zinc finger<br>factors;sequence=AAA<br>AAAAAAAAA<br>TF=ZNF384;class=C2H2<br>zinc finger<br>factors;sequence=AAA<br>AAAAAAAAA<br>TF=ZNF384;class=C2H2<br>zinc finger<br>factors;sequence=AAA<br>AAAAAAAAA<br>TF=ZNF384;class=C2H2<br>zinc finger<br>factors;sequence=AAA<br>AAAAAAAAA<br>TF=ZNF384;class=C2H2<br>zinc finger<br>factors;sequence=AAA<br>AAAAAAAAA<br>TF=ZNF384;class=C2H2<br>zinc finger<br>factors;sequence=AAA<br>AAAAAAAAA<br>TF=ZNF384;class=C2H2<br>zinc finger<br>factors;sequence=AAA<br>AAAAAAAAA |
| NOX4 NM_00<br>1300995 | TFB<br>S | TFBS | 151      | 15<br>9  | 0.99324<br>2305 | + | . |                                                                                                                                                                                                                                                                                                                                                                                                                                                                                                                                                                                                                                                                                                                                                                                                   |
| NOX4 NM_00<br>1300995 | TFB<br>S | TFBS | 241<br>4 | 24<br>25 | 0.99323<br>0986 | + | . |                                                                                                                                                                                                                                                                                                                                                                                                                                                                                                                                                                                                                                                                                                                                                                                                   |
| NOX4 NM_00<br>1300995 | TFB<br>S | TFBS | 241<br>5 | 24<br>26 | 0.99323<br>0986 | + | . |                                                                                                                                                                                                                                                                                                                                                                                                                                                                                                                                                                                                                                                                                                                                                                                                   |
| NOX4 NM_00<br>1300995 | TFB<br>S | TFBS | 241<br>6 | 24<br>27 | 0.99323<br>0986 | + | . |                                                                                                                                                                                                                                                                                                                                                                                                                                                                                                                                                                                                                                                                                                                                                                                                   |
| NOX4 NM_00<br>1300995 | TFB<br>S | TFBS | 241<br>7 | 24<br>28 | 0.99323<br>0986 | + | . |                                                                                                                                                                                                                                                                                                                                                                                                                                                                                                                                                                                                                                                                                                                                                                                                   |
| NOX4 NM_00<br>1300995 | TFB<br>S | TFBS | 241<br>8 | 24<br>29 | 0.99323<br>0986 | + | . |                                                                                                                                                                                                                                                                                                                                                                                                                                                                                                                                                                                                                                                                                                                                                                                                   |
| NOX4 NM_00<br>1300995 | TFB<br>S | TFBS | 241<br>9 | 24<br>30 | 0.99323<br>0986 | + | . |                                                                                                                                                                                                                                                                                                                                                                                                                                                                                                                                                                                                                                                                                                                                                                                                   |
| NOX4 NM_00<br>1300995 | TFB<br>S | TFBS | 242<br>0 | 24<br>31 | 0.99323<br>0986 | + | . |                                                                                                                                                                                                                                                                                                                                                                                                                                                                                                                                                                                                                                                                                                                                                                                                   |
| NOX4 NM_00<br>1300995 | TFB<br>S | TFBS | 242<br>1 | 24<br>32 | 0.99323<br>0986 | + | . |                                                                                                                                                                                                                                                                                                                                                                                                                                                                                                                                                                                                                                                                                                                                                                                                   |
| NOX4 NM_00<br>1300995 | TFB<br>S | TFBS | 242<br>2 | 24<br>33 | 0.99323<br>0986 | + | . |                                                                                                                                                                                                                                                                                                                                                                                                                                                                                                                                                                                                                                                                                                                                                                                                   |

|                       |          |      |          |          |                 |   |   |                                                                          |
|-----------------------|----------|------|----------|----------|-----------------|---|---|--------------------------------------------------------------------------|
|                       |          |      |          |          |                 |   |   | factors;sequence=AAA<br>AAAAAAAAA<br>TF=ZNF384;class=C2H2<br>zinc finger |
| NOX4 NM_00<br>1300995 | TFB<br>S | TFBS | 242<br>3 | 24<br>34 | 0.99323<br>0986 | + | . | factors;sequence=AAA<br>AAAAAAAAA<br>TF=ZNF384;class=C2H2<br>zinc finger |
| NOX4 NM_00<br>1300995 | TFB<br>S | TFBS | 242<br>4 | 24<br>35 | 0.99323<br>0986 | + | . | factors;sequence=AAA<br>AAAAAAAAA<br>TF=ZNF384;class=C2H2<br>zinc finger |
| NOX4 NM_00<br>1300995 | TFB<br>S | TFBS | 242<br>5 | 24<br>36 | 0.99323<br>0986 | + | . | factors;sequence=AAA<br>AAAAAAAAA<br>TF=ZNF384;class=C2H2<br>zinc finger |
| NOX4 NM_00<br>1300995 | TFB<br>S | TFBS | 242<br>6 | 24<br>37 | 0.99323<br>0986 | + | . | factors;sequence=AAA<br>AAAAAAAAA<br>TF=ZNF384;class=C2H2<br>zinc finger |
| NOX4 NM_00<br>1300995 | TFB<br>S | TFBS | 242<br>7 | 24<br>38 | 0.99323<br>0986 | + | . | factors;sequence=AAA<br>AAAAAAAAA<br>TF=ZNF384;class=C2H2<br>zinc finger |
| NOX4 NM_00<br>1300995 | TFB<br>S | TFBS | 820      | 83<br>1  | 0.99323<br>0986 | - | . | factors;sequence=AAA<br>AAAAAAAAA<br>TF=ZNF384;class=C2H2<br>zinc finger |
| NOX4 NM_00<br>1143837 | TFB<br>S | TFBS | 739      | 75<br>0  | 0.99323<br>0986 | + | . | factors;sequence=AAA<br>AAAAAAAAA<br>TF=ZNF384;class=C2H2<br>zinc finger |
| NOX4 NM_00<br>1143837 | TFB<br>S | TFBS | 241<br>4 | 24<br>25 | 0.99323<br>0986 | + | . | factors;sequence=AAA<br>AAAAAAAAA<br>TF=ZNF384;class=C2H2<br>zinc finger |
| NOX4 NM_00<br>1143837 | TFB<br>S | TFBS | 241<br>5 | 24<br>26 | 0.99323<br>0986 | + | . | factors;sequence=AAA<br>AAAAAAAAA<br>TF=ZNF384;class=C2H2<br>zinc finger |
| NOX4 NM_00<br>1143837 | TFB<br>S | TFBS | 241<br>6 | 24<br>27 | 0.99323<br>0986 | + | . | factors;sequence=AAA<br>AAAAAAAAA<br>TF=ZNF384;class=C2H2<br>zinc finger |
| NOX4 NM_00<br>1143837 | TFB<br>S | TFBS | 241<br>7 | 24<br>28 | 0.99323<br>0986 | + | . | TF=ZNF384;class=C2H2<br>zinc finger                                      |

|                       |          |      |          |          |                 |   |   |                                                                          |
|-----------------------|----------|------|----------|----------|-----------------|---|---|--------------------------------------------------------------------------|
|                       |          |      |          |          |                 |   |   | factors;sequence=AAA<br>AAAAAAAAA<br>TF=ZNF384;class=C2H2<br>zinc finger |
| NOX4 NM_00<br>1143837 | TFB<br>S | TFBS | 241<br>8 | 24<br>29 | 0.99323<br>0986 | + | . | factors;sequence=AAA<br>AAAAAAAAA<br>TF=ZNF384;class=C2H2<br>zinc finger |
| NOX4 NM_00<br>1143837 | TFB<br>S | TFBS | 241<br>9 | 24<br>30 | 0.99323<br>0986 | + | . | factors;sequence=AAA<br>AAAAAAAAA<br>TF=ZNF384;class=C2H2<br>zinc finger |
| NOX4 NM_00<br>1143837 | TFB<br>S | TFBS | 242<br>0 | 24<br>31 | 0.99323<br>0986 | + | . | factors;sequence=AAA<br>AAAAAAAAA<br>TF=ZNF384;class=C2H2<br>zinc finger |
| NOX4 NM_00<br>1143837 | TFB<br>S | TFBS | 242<br>1 | 24<br>32 | 0.99323<br>0986 | + | . | factors;sequence=AAA<br>AAAAAAAAA<br>TF=ZNF384;class=C2H2<br>zinc finger |
| NOX4 NM_00<br>1143837 | TFB<br>S | TFBS | 242<br>2 | 24<br>33 | 0.99323<br>0986 | + | . | factors;sequence=AAA<br>AAAAAAAAA<br>TF=ZNF384;class=C2H2<br>zinc finger |
| NOX4 NM_00<br>1143837 | TFB<br>S | TFBS | 242<br>3 | 24<br>34 | 0.99323<br>0986 | + | . | factors;sequence=AAA<br>AAAAAAAAA<br>TF=ZNF384;class=C2H2<br>zinc finger |
| NOX4 NM_00<br>1143837 | TFB<br>S | TFBS | 242<br>4 | 24<br>35 | 0.99323<br>0986 | + | . | factors;sequence=AAA<br>AAAAAAAAA<br>TF=ZNF384;class=C2H2<br>zinc finger |
| NOX4 NM_00<br>1143837 | TFB<br>S | TFBS | 242<br>5 | 24<br>36 | 0.99323<br>0986 | + | . | factors;sequence=AAA<br>AAAAAAAAA<br>TF=ZNF384;class=C2H2<br>zinc finger |
| NOX4 NM_00<br>1143837 | TFB<br>S | TFBS | 242<br>6 | 24<br>37 | 0.99323<br>0986 | + | . | factors;sequence=AAA<br>AAAAAAAAA<br>TF=ZNF384;class=C2H2<br>zinc finger |
| NOX4 NM_00<br>1143837 | TFB<br>S | TFBS | 242<br>7 | 24<br>38 | 0.99323<br>0986 | + | . | factors;sequence=AAA<br>AAAAAAAAA<br>TF=ZNF384;class=C2H2<br>zinc finger |
| NOX4 NM_00<br>1143837 | TFB<br>S | TFBS | 484      | 49<br>5  | 0.99323<br>0986 | - | . | TF=ZNF384;class=C2H2<br>zinc finger                                      |

|                       |          |      |     |         |                 |   |   |                                                                          |
|-----------------------|----------|------|-----|---------|-----------------|---|---|--------------------------------------------------------------------------|
|                       |          |      |     |         |                 |   |   | factors;sequence=AAA<br>AAAAAAAAA<br>TF=ZNF384;class=C2H2<br>zinc finger |
| NOX4 NM_00<br>1143837 | TFB<br>S | TFBS | 575 | 58<br>6 | 0.99323<br>0986 | - | . | factors;sequence=AAA<br>AAAAAAAAA<br>TF=ZNF384;class=C2H2<br>zinc finger |
| NOX4 NM_00<br>1143837 | TFB<br>S | TFBS | 576 | 58<br>7 | 0.99323<br>0986 | - | . | factors;sequence=AAA<br>AAAAAAAAA<br>TF=ZNF384;class=C2H2<br>zinc finger |
| NOX4 NM_00<br>1143837 | TFB<br>S | TFBS | 577 | 58<br>8 | 0.99323<br>0986 | - | . | factors;sequence=AAA<br>AAAAAAAAA<br>TF=ZNF384;class=C2H2<br>zinc finger |
| NOX4 NM_00<br>1143837 | TFB<br>S | TFBS | 578 | 58<br>9 | 0.99323<br>0986 | - | . | factors;sequence=AAA<br>AAAAAAAAA<br>TF=ZNF384;class=C2H2<br>zinc finger |
| NOX4 NM_00<br>1143837 | TFB<br>S | TFBS | 579 | 59<br>0 | 0.99323<br>0986 | - | . | factors;sequence=AAA<br>AAAAAAAAA<br>TF=ZNF384;class=C2H2<br>zinc finger |
| NOX4 NM_00<br>1143837 | TFB<br>S | TFBS | 580 | 59<br>1 | 0.99323<br>0986 | - | . | factors;sequence=AAA<br>AAAAAAAAA<br>TF=ZNF384;class=C2H2<br>zinc finger |
| NOX4 NM_00<br>1143837 | TFB<br>S | TFBS | 581 | 59<br>2 | 0.99323<br>0986 | - | . | factors;sequence=AAA<br>AAAAAAAAA<br>TF=ZNF384;class=C2H2<br>zinc finger |
| NOX4 NM_00<br>1143837 | TFB<br>S | TFBS | 582 | 59<br>3 | 0.99323<br>0986 | - | . | factors;sequence=AAA<br>AAAAAAAAA<br>TF=ZNF384;class=C2H2<br>zinc finger |
| NOX4 NM_00<br>1143837 | TFB<br>S | TFBS | 583 | 59<br>4 | 0.99323<br>0986 | - | . | factors;sequence=AAA<br>AAAAAAAAA<br>TF=ZNF384;class=C2H2<br>zinc finger |
| NOX4 NM_00<br>1143837 | TFB<br>S | TFBS | 584 | 59<br>5 | 0.99323<br>0986 | - | . | factors;sequence=AAA<br>AAAAAAAAA<br>TF=ZNF384;class=C2H2<br>zinc finger |
| NOX4 NM_00<br>1143837 | TFB<br>S | TFBS | 585 | 59<br>6 | 0.99323<br>0986 | - | . | zinc finger                                                              |

|                       |          |      |          |          |                 |   |   |                                                                          |
|-----------------------|----------|------|----------|----------|-----------------|---|---|--------------------------------------------------------------------------|
|                       |          |      |          |          |                 |   |   | factors;sequence=AAA<br>AAAAAAAAA<br>TF=ZNF384;class=C2H2<br>zinc finger |
| NOX4 NM_00<br>1291929 | TFB<br>S | TFBS | 241<br>4 | 24<br>25 | 0.99323<br>0986 | + | . | factors;sequence=AAA<br>AAAAAAAAA<br>TF=ZNF384;class=C2H2<br>zinc finger |
| NOX4 NM_00<br>1291929 | TFB<br>S | TFBS | 241<br>5 | 24<br>26 | 0.99323<br>0986 | + | . | factors;sequence=AAA<br>AAAAAAAAA<br>TF=ZNF384;class=C2H2<br>zinc finger |
| NOX4 NM_00<br>1291929 | TFB<br>S | TFBS | 241<br>6 | 24<br>27 | 0.99323<br>0986 | + | . | factors;sequence=AAA<br>AAAAAAAAA<br>TF=ZNF384;class=C2H2<br>zinc finger |
| NOX4 NM_00<br>1291929 | TFB<br>S | TFBS | 241<br>7 | 24<br>28 | 0.99323<br>0986 | + | . | factors;sequence=AAA<br>AAAAAAAAA<br>TF=ZNF384;class=C2H2<br>zinc finger |
| NOX4 NM_00<br>1291929 | TFB<br>S | TFBS | 241<br>8 | 24<br>29 | 0.99323<br>0986 | + | . | factors;sequence=AAA<br>AAAAAAAAA<br>TF=ZNF384;class=C2H2<br>zinc finger |
| NOX4 NM_00<br>1291929 | TFB<br>S | TFBS | 241<br>9 | 24<br>30 | 0.99323<br>0986 | + | . | factors;sequence=AAA<br>AAAAAAAAA<br>TF=ZNF384;class=C2H2<br>zinc finger |
| NOX4 NM_00<br>1291929 | TFB<br>S | TFBS | 242<br>0 | 24<br>31 | 0.99323<br>0986 | + | . | factors;sequence=AAA<br>AAAAAAAAA<br>TF=ZNF384;class=C2H2<br>zinc finger |
| NOX4 NM_00<br>1291929 | TFB<br>S | TFBS | 242<br>1 | 24<br>32 | 0.99323<br>0986 | + | . | factors;sequence=AAA<br>AAAAAAAAA<br>TF=ZNF384;class=C2H2<br>zinc finger |
| NOX4 NM_00<br>1291929 | TFB<br>S | TFBS | 242<br>2 | 24<br>33 | 0.99323<br>0986 | + | . | factors;sequence=AAA<br>AAAAAAAAA<br>TF=ZNF384;class=C2H2<br>zinc finger |
| NOX4 NM_00<br>1291929 | TFB<br>S | TFBS | 242<br>3 | 24<br>34 | 0.99323<br>0986 | + | . | factors;sequence=AAA<br>AAAAAAAAA<br>TF=ZNF384;class=C2H2<br>zinc finger |
| NOX4 NM_00<br>1291929 | TFB<br>S | TFBS | 242<br>4 | 24<br>35 | 0.99323<br>0986 | + | . | TF=ZNF384;class=C2H2<br>zinc finger                                      |

|                       |          |      |          |          |                 |   |   |                                                                          |
|-----------------------|----------|------|----------|----------|-----------------|---|---|--------------------------------------------------------------------------|
|                       |          |      |          |          |                 |   |   | factors;sequence=AAA<br>AAAAAAAAA<br>TF=ZNF384;class=C2H2<br>zinc finger |
| NOX4 NM_00<br>1291929 | TFB<br>S | TFBS | 242<br>5 | 24<br>36 | 0.99323<br>0986 | + | . | factors;sequence=AAA<br>AAAAAAAAA<br>TF=ZNF384;class=C2H2<br>zinc finger |
| NOX4 NM_00<br>1291929 | TFB<br>S | TFBS | 242<br>6 | 24<br>37 | 0.99323<br>0986 | + | . | factors;sequence=AAA<br>AAAAAAAAA<br>TF=ZNF384;class=C2H2<br>zinc finger |
| NOX4 NM_00<br>1291929 | TFB<br>S | TFBS | 242<br>7 | 24<br>38 | 0.99323<br>0986 | + | . | factors;sequence=AAA<br>AAAAAAAAA<br>TF=ZNF384;class=C2H2<br>zinc finger |
| NOX4 NM_00<br>1291927 | TFB<br>S | TFBS | 241<br>4 | 24<br>25 | 0.99323<br>0986 | + | . | factors;sequence=AAA<br>AAAAAAAAA<br>TF=ZNF384;class=C2H2<br>zinc finger |
| NOX4 NM_00<br>1291927 | TFB<br>S | TFBS | 241<br>5 | 24<br>26 | 0.99323<br>0986 | + | . | factors;sequence=AAA<br>AAAAAAAAA<br>TF=ZNF384;class=C2H2<br>zinc finger |
| NOX4 NM_00<br>1291927 | TFB<br>S | TFBS | 241<br>6 | 24<br>27 | 0.99323<br>0986 | + | . | factors;sequence=AAA<br>AAAAAAAAA<br>TF=ZNF384;class=C2H2<br>zinc finger |
| NOX4 NM_00<br>1291927 | TFB<br>S | TFBS | 241<br>7 | 24<br>28 | 0.99323<br>0986 | + | . | factors;sequence=AAA<br>AAAAAAAAA<br>TF=ZNF384;class=C2H2<br>zinc finger |
| NOX4 NM_00<br>1291927 | TFB<br>S | TFBS | 241<br>8 | 24<br>29 | 0.99323<br>0986 | + | . | factors;sequence=AAA<br>AAAAAAAAA<br>TF=ZNF384;class=C2H2<br>zinc finger |
| NOX4 NM_00<br>1291927 | TFB<br>S | TFBS | 241<br>9 | 24<br>30 | 0.99323<br>0986 | + | . | factors;sequence=AAA<br>AAAAAAAAA<br>TF=ZNF384;class=C2H2<br>zinc finger |
| NOX4 NM_00<br>1291927 | TFB<br>S | TFBS | 242<br>0 | 24<br>31 | 0.99323<br>0986 | + | . | factors;sequence=AAA<br>AAAAAAAAA<br>TF=ZNF384;class=C2H2<br>zinc finger |
| NOX4 NM_00<br>1291927 | TFB<br>S | TFBS | 242<br>1 | 24<br>32 | 0.99323<br>0986 | + | . | TF=ZNF384;class=C2H2<br>zinc finger                                      |

|                       |          |      |          |          |                 |   |   |                                                                          |
|-----------------------|----------|------|----------|----------|-----------------|---|---|--------------------------------------------------------------------------|
|                       |          |      |          |          |                 |   |   | factors;sequence=AAA<br>AAAAAAAAA<br>TF=ZNF384;class=C2H2<br>zinc finger |
| NOX4 NM_00<br>1291927 | TFB<br>S | TFBS | 242<br>2 | 24<br>33 | 0.99323<br>0986 | + | . | factors;sequence=AAA<br>AAAAAAAAA<br>TF=ZNF384;class=C2H2<br>zinc finger |
| NOX4 NM_00<br>1291927 | TFB<br>S | TFBS | 242<br>3 | 24<br>34 | 0.99323<br>0986 | + | . | factors;sequence=AAA<br>AAAAAAAAA<br>TF=ZNF384;class=C2H2<br>zinc finger |
| NOX4 NM_00<br>1291927 | TFB<br>S | TFBS | 242<br>4 | 24<br>35 | 0.99323<br>0986 | + | . | factors;sequence=AAA<br>AAAAAAAAA<br>TF=ZNF384;class=C2H2<br>zinc finger |
| NOX4 NM_00<br>1291927 | TFB<br>S | TFBS | 242<br>5 | 24<br>36 | 0.99323<br>0986 | + | . | factors;sequence=AAA<br>AAAAAAAAA<br>TF=ZNF384;class=C2H2<br>zinc finger |
| NOX4 NM_00<br>1291927 | TFB<br>S | TFBS | 242<br>6 | 24<br>37 | 0.99323<br>0986 | + | . | factors;sequence=AAA<br>AAAAAAAAA<br>TF=ZNF384;class=C2H2<br>zinc finger |
| NOX4 NM_00<br>1291927 | TFB<br>S | TFBS | 242<br>7 | 24<br>38 | 0.99323<br>0986 | + | . | factors;sequence=AAA<br>AAAAAAAAA<br>TF=ZNF384;class=C2H2<br>zinc finger |
| NOX4 NM_00<br>1291926 | TFB<br>S | TFBS | 241<br>4 | 24<br>25 | 0.99323<br>0986 | + | . | factors;sequence=AAA<br>AAAAAAAAA<br>TF=ZNF384;class=C2H2<br>zinc finger |
| NOX4 NM_00<br>1291926 | TFB<br>S | TFBS | 241<br>5 | 24<br>26 | 0.99323<br>0986 | + | . | factors;sequence=AAA<br>AAAAAAAAA<br>TF=ZNF384;class=C2H2<br>zinc finger |
| NOX4 NM_00<br>1291926 | TFB<br>S | TFBS | 241<br>6 | 24<br>27 | 0.99323<br>0986 | + | . | factors;sequence=AAA<br>AAAAAAAAA<br>TF=ZNF384;class=C2H2<br>zinc finger |
| NOX4 NM_00<br>1291926 | TFB<br>S | TFBS | 241<br>7 | 24<br>28 | 0.99323<br>0986 | + | . | factors;sequence=AAA<br>AAAAAAAAA<br>TF=ZNF384;class=C2H2<br>zinc finger |
| NOX4 NM_00<br>1291926 | TFB<br>S | TFBS | 241<br>8 | 24<br>29 | 0.99323<br>0986 | + | . | TF=ZNF384;class=C2H2<br>zinc finger                                      |

|                       |          |      |          |          |                 |   |   |                                                                          |
|-----------------------|----------|------|----------|----------|-----------------|---|---|--------------------------------------------------------------------------|
|                       |          |      |          |          |                 |   |   | factors;sequence=AAA<br>AAAAAAAAA<br>TF=ZNF384;class=C2H2<br>zinc finger |
| NOX4 NM_00<br>1291926 | TFB<br>S | TFBS | 241<br>9 | 24<br>30 | 0.99323<br>0986 | + | . | factors;sequence=AAA<br>AAAAAAAAA<br>TF=ZNF384;class=C2H2<br>zinc finger |
| NOX4 NM_00<br>1291926 | TFB<br>S | TFBS | 242<br>0 | 24<br>31 | 0.99323<br>0986 | + | . | factors;sequence=AAA<br>AAAAAAAAA<br>TF=ZNF384;class=C2H2<br>zinc finger |
| NOX4 NM_00<br>1291926 | TFB<br>S | TFBS | 242<br>1 | 24<br>32 | 0.99323<br>0986 | + | . | factors;sequence=AAA<br>AAAAAAAAA<br>TF=ZNF384;class=C2H2<br>zinc finger |
| NOX4 NM_00<br>1291926 | TFB<br>S | TFBS | 242<br>2 | 24<br>33 | 0.99323<br>0986 | + | . | factors;sequence=AAA<br>AAAAAAAAA<br>TF=ZNF384;class=C2H2<br>zinc finger |
| NOX4 NM_00<br>1291926 | TFB<br>S | TFBS | 242<br>3 | 24<br>34 | 0.99323<br>0986 | + | . | factors;sequence=AAA<br>AAAAAAAAA<br>TF=ZNF384;class=C2H2<br>zinc finger |
| NOX4 NM_00<br>1291926 | TFB<br>S | TFBS | 242<br>4 | 24<br>35 | 0.99323<br>0986 | + | . | factors;sequence=AAA<br>AAAAAAAAA<br>TF=ZNF384;class=C2H2<br>zinc finger |
| NOX4 NM_00<br>1291926 | TFB<br>S | TFBS | 242<br>5 | 24<br>36 | 0.99323<br>0986 | + | . | factors;sequence=AAA<br>AAAAAAAAA<br>TF=ZNF384;class=C2H2<br>zinc finger |
| NOX4 NM_00<br>1291926 | TFB<br>S | TFBS | 242<br>6 | 24<br>37 | 0.99323<br>0986 | + | . | factors;sequence=AAA<br>AAAAAAAAA<br>TF=ZNF384;class=C2H2<br>zinc finger |
| NOX4 NM_00<br>1291926 | TFB<br>S | TFBS | 242<br>7 | 24<br>38 | 0.99323<br>0986 | + | . | factors;sequence=AAA<br>AAAAAAAAA<br>TF=ZNF384;class=C2H2<br>zinc finger |
| NOX4 NM_01<br>6931    | TFB<br>S | TFBS | 241<br>4 | 24<br>25 | 0.99323<br>0986 | + | . | factors;sequence=AAA<br>AAAAAAAAA<br>TF=ZNF384;class=C2H2<br>zinc finger |
| NOX4 NM_01<br>6931    | TFB<br>S | TFBS | 241<br>5 | 24<br>26 | 0.99323<br>0986 | + | . | TF=ZNF384;class=C2H2<br>zinc finger                                      |



|                    |          |      |          |          |                 |   |   |  |                                                                          |
|--------------------|----------|------|----------|----------|-----------------|---|---|--|--------------------------------------------------------------------------|
|                    |          |      |          |          |                 |   |   |  | factors;sequence=AAA<br>AAAAAAAAA<br>TF=ZNF384;class=C2H2<br>zinc finger |
| NOX4 NM_01<br>6931 | TFB<br>S | TFBS | 241<br>6 | 24<br>27 | 0.99323<br>0986 | + | . |  | factors;sequence=AAA<br>AAAAAAAAA<br>TF=ZNF384;class=C2H2<br>zinc finger |
| NOX4 NM_01<br>6931 | TFB<br>S | TFBS | 241<br>7 | 24<br>28 | 0.99323<br>0986 | + | . |  | factors;sequence=AAA<br>AAAAAAAAA<br>TF=ZNF384;class=C2H2<br>zinc finger |
| NOX4 NM_01<br>6931 | TFB<br>S | TFBS | 241<br>8 | 24<br>29 | 0.99323<br>0986 | + | . |  | factors;sequence=AAA<br>AAAAAAAAA<br>TF=ZNF384;class=C2H2<br>zinc finger |
| NOX4 NM_01<br>6931 | TFB<br>S | TFBS | 241<br>9 | 24<br>30 | 0.99323<br>0986 | + | . |  | factors;sequence=AAA<br>AAAAAAAAA<br>TF=ZNF384;class=C2H2<br>zinc finger |
| NOX4 NM_01<br>6931 | TFB<br>S | TFBS | 242<br>0 | 24<br>31 | 0.99323<br>0986 | + | . |  | factors;sequence=AAA<br>AAAAAAAAA<br>TF=ZNF384;class=C2H2<br>zinc finger |
| NOX4 NM_01<br>6931 | TFB<br>S | TFBS | 242<br>1 | 24<br>32 | 0.99323<br>0986 | + | . |  | factors;sequence=AAA<br>AAAAAAAAA<br>TF=ZNF384;class=C2H2<br>zinc finger |
| NOX4 NM_01<br>6931 | TFB<br>S | TFBS | 242<br>2 | 24<br>33 | 0.99323<br>0986 | + | . |  | factors;sequence=AAA<br>AAAAAAAAA<br>TF=ZNF384;class=C2H2<br>zinc finger |
| NOX4 NM_01<br>6931 | TFB<br>S | TFBS | 242<br>3 | 24<br>34 | 0.99323<br>0986 | + | . |  | factors;sequence=AAA<br>AAAAAAAAA<br>TF=ZNF384;class=C2H2<br>zinc finger |
| NOX4 NM_01<br>6931 | TFB<br>S | TFBS | 242<br>4 | 24<br>35 | 0.99323<br>0986 | + | . |  | factors;sequence=AAA<br>AAAAAAAAA<br>TF=ZNF384;class=C2H2<br>zinc finger |
| NOX4 NM_01<br>6931 | TFB<br>S | TFBS | 242<br>5 | 24<br>36 | 0.99323<br>0986 | + | . |  | factors;sequence=AAA<br>AAAAAAAAA<br>TF=ZNF384;class=C2H2<br>zinc finger |
| NOX4 NM_01<br>6931 | TFB<br>S | TFBS | 242<br>6 | 24<br>37 | 0.99323<br>0986 | + | . |  | TF=ZNF384;class=C2H2<br>zinc finger                                      |

|                       |          |      |          |          |                 |   |   |                                                                          |
|-----------------------|----------|------|----------|----------|-----------------|---|---|--------------------------------------------------------------------------|
|                       |          |      |          |          |                 |   |   | factors;sequence=AAA<br>AAAAAAAAA<br>TF=ZNF384;class=C2H2<br>zinc finger |
| NOX4 NM_01<br>6931    | TFB<br>S | TFBS | 242<br>7 | 24<br>38 | 0.99323<br>0986 | + | . | factors;sequence=AAA<br>AAAAAAAAA<br>TF=ZNF384;class=C2H2<br>zinc finger |
| NOX4 NM_00<br>1143836 | TFB<br>S | TFBS | 241<br>4 | 24<br>25 | 0.99323<br>0986 | + | . | factors;sequence=AAA<br>AAAAAAAAA<br>TF=ZNF384;class=C2H2<br>zinc finger |
| NOX4 NM_00<br>1143836 | TFB<br>S | TFBS | 241<br>5 | 24<br>26 | 0.99323<br>0986 | + | . | factors;sequence=AAA<br>AAAAAAAAA<br>TF=ZNF384;class=C2H2<br>zinc finger |
| NOX4 NM_00<br>1143836 | TFB<br>S | TFBS | 241<br>6 | 24<br>27 | 0.99323<br>0986 | + | . | factors;sequence=AAA<br>AAAAAAAAA<br>TF=ZNF384;class=C2H2<br>zinc finger |
| NOX4 NM_00<br>1143836 | TFB<br>S | TFBS | 241<br>7 | 24<br>28 | 0.99323<br>0986 | + | . | factors;sequence=AAA<br>AAAAAAAAA<br>TF=ZNF384;class=C2H2<br>zinc finger |
| NOX4 NM_00<br>1143836 | TFB<br>S | TFBS | 241<br>8 | 24<br>29 | 0.99323<br>0986 | + | . | factors;sequence=AAA<br>AAAAAAAAA<br>TF=ZNF384;class=C2H2<br>zinc finger |
| NOX4 NM_00<br>1143836 | TFB<br>S | TFBS | 241<br>9 | 24<br>30 | 0.99323<br>0986 | + | . | factors;sequence=AAA<br>AAAAAAAAA<br>TF=ZNF384;class=C2H2<br>zinc finger |
| NOX4 NM_00<br>1143836 | TFB<br>S | TFBS | 242<br>0 | 24<br>31 | 0.99323<br>0986 | + | . | factors;sequence=AAA<br>AAAAAAAAA<br>TF=ZNF384;class=C2H2<br>zinc finger |
| NOX4 NM_00<br>1143836 | TFB<br>S | TFBS | 242<br>1 | 24<br>32 | 0.99323<br>0986 | + | . | factors;sequence=AAA<br>AAAAAAAAA<br>TF=ZNF384;class=C2H2<br>zinc finger |
| NOX4 NM_00<br>1143836 | TFB<br>S | TFBS | 242<br>2 | 24<br>33 | 0.99323<br>0986 | + | . | factors;sequence=AAA<br>AAAAAAAAA<br>TF=ZNF384;class=C2H2<br>zinc finger |
| NOX4 NM_00<br>1143836 | TFB<br>S | TFBS | 242<br>3 | 24<br>34 | 0.99323<br>0986 | + | . | TF=ZNF384;class=C2H2<br>zinc finger                                      |

|                       |          |      |          |          |                 |   |   |                                                                          |
|-----------------------|----------|------|----------|----------|-----------------|---|---|--------------------------------------------------------------------------|
|                       |          |      |          |          |                 |   |   | factors;sequence=AAA<br>AAAAAAAAA<br>TF=ZNF384;class=C2H2<br>zinc finger |
| NOX4 NM_00<br>1143836 | TFB<br>S | TFBS | 242<br>4 | 24<br>35 | 0.99323<br>0986 | + | · | factors;sequence=AAA<br>AAAAAAAAA<br>TF=ZNF384;class=C2H2<br>zinc finger |
| NOX4 NM_00<br>1143836 | TFB<br>S | TFBS | 242<br>5 | 24<br>36 | 0.99323<br>0986 | + | · | factors;sequence=AAA<br>AAAAAAAAA<br>TF=ZNF384;class=C2H2<br>zinc finger |
| NOX4 NM_00<br>1143836 | TFB<br>S | TFBS | 242<br>6 | 24<br>37 | 0.99323<br>0986 | + | · | factors;sequence=AAA<br>AAAAAAAAA<br>TF=ZNF384;class=C2H2<br>zinc finger |
| NOX4 NM_00<br>1143836 | TFB<br>S | TFBS | 242<br>7 | 24<br>38 | 0.99323<br>0986 | + | · | factors;sequence=AAA<br>AAAAAAAAA<br>TF=ZNF384;class=C2H2<br>zinc finger |
| NOX4 NM_00<br>1300995 | TFB<br>S | TFBS | 187<br>1 | 18<br>78 | 0.99317<br>1445 | + | · | TF=GSX2;class=Homeo<br>domain<br>factors;sequence=CTC<br>ATTAG           |
| NOX4 NM_00<br>1291929 | TFB<br>S | TFBS | 412      | 41<br>9  | 0.99317<br>1445 | + | · | TF=GSX2;class=Homeo<br>domain<br>factors;sequence=CTC<br>ATTAG           |
| NOX4 NM_00<br>1291927 | TFB<br>S | TFBS | 630      | 63<br>7  | 0.99317<br>1445 | + | · | TF=GSX2;class=Homeo<br>domain<br>factors;sequence=CTC<br>ATTAG           |
| NOX4 NM_00<br>1291926 | TFB<br>S | TFBS | 102<br>7 | 10<br>34 | 0.99317<br>1445 | + | · | TF=GSX2;class=Homeo<br>domain<br>factors;sequence=CTC<br>ATTAG           |
| NOX4 NM_01<br>6931    | TFB<br>S | TFBS | 102<br>7 | 10<br>34 | 0.99317<br>1445 | + | · | TF=GSX2;class=Homeo<br>domain<br>factors;sequence=CTC<br>ATTAG           |
| NOX4 NM_00<br>1143836 | TFB<br>S | TFBS | 102<br>7 | 10<br>34 | 0.99317<br>1445 | + | · | TF=GSX2;class=Homeo<br>domain<br>factors;sequence=CTC<br>ATTAG           |
| NOX4 NR_12<br>0406    | TFB<br>S | TFBS | 102<br>7 | 10<br>34 | 0.99317<br>1445 | + | · | TF=GSX2;class=Homeo<br>domain                                            |

|                       |          |      |          |          |                 |   |   |                                                                 |
|-----------------------|----------|------|----------|----------|-----------------|---|---|-----------------------------------------------------------------|
|                       |          |      |          |          |                 |   |   | factors;sequence=CTC<br>ATTAG<br>TF=HOXB6;class=Homeo<br>domain |
| NOX4 NM_00<br>1300995 | TFB<br>S | TFBS | 147      | 15<br>4  | 0.99289<br>7745 | — | · | factors;sequence=TTA<br>ATGAC<br>TF=HOXB6;class=Homeo<br>domain |
| NOX4 NM_00<br>1291929 | TFB<br>S | TFBS | 191<br>9 | 19<br>26 | 0.99289<br>7745 | — | · | factors;sequence=TTA<br>ATGAC<br>TF=HOXB4;class=Homeo<br>domain |
| NOX4 NM_00<br>1300995 | TFB<br>S | TFBS | 177<br>8 | 17<br>85 | 0.99288<br>7021 | — | · | factors;sequence=ATA<br>ATTAA<br>TF=HOXB4;class=Homeo<br>domain |
| NOX4 NM_00<br>1143837 | TFB<br>S | TFBS | 182<br>8 | 18<br>35 | 0.99288<br>7021 | — | · | factors;sequence=ATA<br>ATTAA<br>TF=HOXB4;class=Homeo<br>domain |
| NOX4 NM_00<br>1291929 | TFB<br>S | TFBS | 319      | 32<br>6  | 0.99288<br>7021 | — | · | factors;sequence=ATA<br>ATTAA<br>TF=HOXB4;class=Homeo<br>domain |
| NOX4 NM_00<br>1291927 | TFB<br>S | TFBS | 537      | 54<br>4  | 0.99288<br>7021 | — | · | factors;sequence=ATA<br>ATTAA<br>TF=HOXB4;class=Homeo<br>domain |
| NOX4 NM_00<br>1291926 | TFB<br>S | TFBS | 934      | 94<br>1  | 0.99288<br>7021 | — | · | factors;sequence=ATA<br>ATTAA<br>TF=HOXB4;class=Homeo<br>domain |
| NOX4 NM_01<br>6931    | TFB<br>S | TFBS | 934      | 94<br>1  | 0.99288<br>7021 | — | · | factors;sequence=ATA<br>ATTAA<br>TF=HOXB4;class=Homeo<br>domain |
| NOX4 NM_00<br>1143836 | TFB<br>S | TFBS | 934      | 94<br>1  | 0.99288<br>7021 | — | · | factors;sequence=ATA<br>ATTAA<br>TF=HOXB4;class=Homeo<br>domain |
| NOX4 NR_12<br>0406    | TFB<br>S | TFBS | 934      | 94<br>1  | 0.99288<br>7021 | — | · | factors;sequence=ATA<br>ATTAA<br>TF=DRGX;class=Homeo<br>domain  |
| NOX4 NM_00<br>1143837 | TFB<br>S | TFBS | 131<br>6 | 13<br>23 | 0.99279<br>5264 | — | · |                                                                 |

|                       |          |      |          |          |                 |   |   |                                                                                      |
|-----------------------|----------|------|----------|----------|-----------------|---|---|--------------------------------------------------------------------------------------|
|                       |          |      |          |          |                 |   |   | factors;sequence=CTA<br>ATTAT<br>TF=NFIA;class=SMAD/N<br>F-1 DNA-binding<br>domain   |
| NOX4 NM_00<br>1300995 | TFB<br>S | TFBS | 244<br>1 | 24<br>50 | 0.99278<br>1701 | - | . | factors;sequence=AGT<br>GCCAATT<br>TF=NFIA;class=SMAD/N<br>F-1 DNA-binding<br>domain |
| NOX4 NM_00<br>1143837 | TFB<br>S | TFBS | 244<br>1 | 24<br>50 | 0.99278<br>1701 | - | . | factors;sequence=AGT<br>GCCAATT<br>TF=NFIA;class=SMAD/N<br>F-1 DNA-binding<br>domain |
| NOX4 NM_00<br>1291929 | TFB<br>S | TFBS | 244<br>1 | 24<br>50 | 0.99278<br>1701 | - | . | factors;sequence=AGT<br>GCCAATT<br>TF=NFIA;class=SMAD/N<br>F-1 DNA-binding<br>domain |
| NOX4 NM_00<br>1291927 | TFB<br>S | TFBS | 244<br>1 | 24<br>50 | 0.99278<br>1701 | - | . | factors;sequence=AGT<br>GCCAATT<br>TF=NFIA;class=SMAD/N<br>F-1 DNA-binding<br>domain |
| NOX4 NM_00<br>1291926 | TFB<br>S | TFBS | 244<br>1 | 24<br>50 | 0.99278<br>1701 | - | . | factors;sequence=AGT<br>GCCAATT<br>TF=NFIA;class=SMAD/N<br>F-1 DNA-binding<br>domain |
| NOX4 NM_01<br>6931    | TFB<br>S | TFBS | 244<br>1 | 24<br>50 | 0.99278<br>1701 | - | . | factors;sequence=AGT<br>GCCAATT<br>TF=NFIA;class=SMAD/N<br>F-1 DNA-binding<br>domain |
| NOX4 NM_00<br>1143836 | TFB<br>S | TFBS | 244<br>1 | 24<br>50 | 0.99278<br>1701 | - | . | factors;sequence=AGT<br>GCCAATT<br>TF=UNCX;class=Homeo<br>domain                     |
| NOX4 NM_00<br>1300995 | TFB<br>S | TFBS | 746      | 75<br>3  | 0.99252<br>567  | - | . | factors;sequence=CCA<br>ATTAA<br>TF=UNCX;class=Homeo<br>domain                       |
| NOX4 NM_00<br>1300995 | TFB<br>S | TFBS | 171<br>8 | 17<br>25 | 0.99252<br>567  | - | . | factors;sequence=CCA                                                                 |

|                   |          |      |          |          |                 |   |   |                                                                                         |
|-------------------|----------|------|----------|----------|-----------------|---|---|-----------------------------------------------------------------------------------------|
| NOX4 NM_001291929 | TFB<br>S | TFBS | 259      | 26<br>6  | 0.99252<br>567  | - | . | ATTAA<br>TF=UNCX;class=Homeo<br>domain<br>factors;sequence=CCA<br>ATTAA                 |
| NOX4 NM_001291927 | TFB<br>S | TFBS | 477      | 48<br>4  | 0.99252<br>567  | - | . | TF=UNCX;class=Homeo<br>domain<br>factors;sequence=CCA<br>ATTAA                          |
| NOX4 NM_001291926 | TFB<br>S | TFBS | 874      | 88<br>1  | 0.99252<br>567  | - | . | TF=UNCX;class=Homeo<br>domain<br>factors;sequence=CCA<br>ATTAA                          |
| NOX4 NM_016931    | TFB<br>S | TFBS | 874      | 88<br>1  | 0.99252<br>567  | - | . | TF=UNCX;class=Homeo<br>domain<br>factors;sequence=CCA<br>ATTAA                          |
| NOX4 NM_001143836 | TFB<br>S | TFBS | 874      | 88<br>1  | 0.99252<br>567  | - | . | TF=UNCX;class=Homeo<br>domain<br>factors;sequence=CCA<br>ATTAA                          |
| NOX4 NR_120406    | TFB<br>S | TFBS | 874      | 88<br>1  | 0.99252<br>567  | - | . | TF=UNCX;class=Homeo<br>domain<br>factors;sequence=CCA<br>ATTAA                          |
| NOX4 NM_001143837 | TFB<br>S | TFBS | 509      | 51<br>8  | 0.99190<br>7541 | + | . | TF=GSC2;class=Homeo<br>domain<br>factors;sequence=CTT<br>AATCCCC                        |
| NOX4 NM_001291929 | TFB<br>S | TFBS | 107<br>3 | 10<br>80 | 0.99186<br>3024 | - | . | TF=SOX18;class=High-<br>mobility group (HMG)<br>domain<br>factors;sequence=AAC<br>AATGC |
| NOX4 NM_001291927 | TFB<br>S | TFBS | 129<br>1 | 12<br>98 | 0.99186<br>3024 | - | . | TF=SOX18;class=High-<br>mobility group (HMG)<br>domain<br>factors;sequence=AAC<br>AATGC |
| NOX4 NM_001291926 | TFB<br>S | TFBS | 168<br>8 | 16<br>95 | 0.99186<br>3024 | - | . | TF=SOX18;class=High-<br>mobility group (HMG)<br>domain<br>factors;sequence=AAC<br>AATGC |

|                   |          |      |          |          |                 |   |   |                                                                            |
|-------------------|----------|------|----------|----------|-----------------|---|---|----------------------------------------------------------------------------|
| NOX4 NM_016931    | TFB<br>S | TFBS | 168<br>8 | 16<br>95 | 0.99186<br>3024 | - | . | TF=SOX18;class=High-mobility group (HMG) domain factors;sequence=AAC AATGC |
| NOX4 NM_001143836 | TFB<br>S | TFBS | 168<br>8 | 16<br>95 | 0.99186<br>3024 | - | . | TF=SOX18;class=High-mobility group (HMG) domain factors;sequence=AAC AATGC |
| NOX4 NR_0406      | TFB<br>S | TFBS | 168<br>8 | 16<br>95 | 0.99186<br>3024 | - | . | TF=SOX18;class=High-mobility group (HMG) domain factors;sequence=AAC AATGC |
| NOX4 NM_001143837 | TFB<br>S | TFBS | 131<br>6 | 13<br>23 | 0.99170<br>1267 | - | . | TF=VSX2;class=Homeo domain factors;sequence=CTA ATTAT                      |
| NOX4 NM_001300995 | TFB<br>S | TFBS | 190      | 19<br>7  | 0.99155<br>1227 | + | . | TF=RHOXF1;class=Homeo domain factors;sequence=GTA ATCCC                    |
| NOX4 NM_001300995 | TFB<br>S | TFBS | 214<br>6 | 21<br>53 | 0.99155<br>1227 | + | . | TF=RHOXF1;class=Homeo domain factors;sequence=GTA ATCCC                    |
| NOX4 NM_001300995 | TFB<br>S | TFBS | 108<br>4 | 10<br>91 | 0.99155<br>1227 | - | . | TF=RHOXF1;class=Homeo domain factors;sequence=GTA ATCCC                    |
| NOX4 NM_001143837 | TFB<br>S | TFBS | 214<br>6 | 21<br>53 | 0.99155<br>1227 | + | . | TF=RHOXF1;class=Homeo domain factors;sequence=GTA ATCCC                    |
| NOX4 NM_001291929 | TFB<br>S | TFBS | 214<br>6 | 21<br>53 | 0.99155<br>1227 | + | . | TF=RHOXF1;class=Homeo domain factors;sequence=GTA ATCCC                    |
| NOX4 NM_001291927 | TFB<br>S | TFBS | 214<br>6 | 21<br>53 | 0.99155<br>1227 | + | . | TF=RHOXF1;class=Homeo domain factors;sequence=GTA ATCCC                    |
| NOX4 NM_00        | TFB      | TFBS | 214      | 21       | 0.99155         | + | . | TF=RHOXF1;class=Home                                                       |

|                       |          |      |          |          |                 |   |   |                                                                   |
|-----------------------|----------|------|----------|----------|-----------------|---|---|-------------------------------------------------------------------|
| 1291926               | S        |      | 6        | 53       | 1227            |   |   | o domain<br>factors;sequence=GTA<br>ATCCC<br>TF=RHOXF1;class=Home |
| NOX4 NM_00<br>1291926 | TFB<br>S | TFBS | 240      | 24<br>7  | 0.99155<br>1227 | - | . | o domain<br>factors;sequence=GTA<br>ATCCC<br>TF=RHOXF1;class=Home |
| NOX4 NM_01<br>6931    | TFB<br>S | TFBS | 214<br>6 | 21<br>53 | 0.99155<br>1227 | + | . | o domain<br>factors;sequence=GTA<br>ATCCC<br>TF=RHOXF1;class=Home |
| NOX4 NM_01<br>6931    | TFB<br>S | TFBS | 240      | 24<br>7  | 0.99155<br>1227 | - | . | o domain<br>factors;sequence=GTA<br>ATCCC<br>TF=RHOXF1;class=Home |
| NOX4 NM_00<br>1143836 | TFB<br>S | TFBS | 214<br>6 | 21<br>53 | 0.99155<br>1227 | + | . | o domain<br>factors;sequence=GTA<br>ATCCC<br>TF=RHOXF1;class=Home |
| NOX4 NM_00<br>1143836 | TFB<br>S | TFBS | 240      | 24<br>7  | 0.99155<br>1227 | - | . | o domain<br>factors;sequence=GTA<br>ATCCC<br>TF=RHOXF1;class=Home |
| NOX4 NR_12<br>0406    | TFB<br>S | TFBS | 240      | 24<br>7  | 0.99155<br>1227 | - | . | o domain<br>factors;sequence=GTA<br>ATCCC<br>TF=HOXA4;class=Homeo |
| NOX4 NM_00<br>1300995 | TFB<br>S | TFBS | 169<br>7 | 17<br>04 | 0.99152<br>8411 | + | . | domain<br>factors;sequence=ATC<br>ATTAA<br>TF=HOXA4;class=Homeo   |
| NOX4 NM_00<br>1291929 | TFB<br>S | TFBS | 238      | 24<br>5  | 0.99152<br>8411 | + | . | domain<br>factors;sequence=ATC<br>ATTAA<br>TF=HOXA4;class=Homeo   |
| NOX4 NM_00<br>1291927 | TFB<br>S | TFBS | 456      | 46<br>3  | 0.99152<br>8411 | + | . | domain<br>factors;sequence=ATC<br>ATTAA<br>TF=HOXA4;class=Homeo   |
| NOX4 NM_00<br>1291926 | TFB<br>S | TFBS | 853      | 86<br>0  | 0.99152<br>8411 | + | . | domain<br>factors;sequence=ATC<br>ATTAA<br>TF=HOXA4;class=Homeo   |
| NOX4 NM_01            | TFB      | TFBS | 853      | 86       | 0.99152         | + | . | TF=HOXA4;class=Homeo                                              |



|                       |          |      |          |          |                 |   |   |                                                                                                     |
|-----------------------|----------|------|----------|----------|-----------------|---|---|-----------------------------------------------------------------------------------------------------|
| 6931                  | S        |      |          | 0        | 8411            |   |   | domain<br>factors;sequence=ATC<br>ATTAA<br>TF=HOXA4;class=Homeo                                     |
| NOX4 NM_00<br>1143836 | TFB<br>S | TFBS | 853      | 86<br>0  | 0.99152<br>8411 | + | . | domain<br>factors;sequence=ATC<br>ATTAA<br>TF=HOXA4;class=Homeo                                     |
| NOX4 NR_12<br>0406    | TFB<br>S | TFBS | 853      | 86<br>0  | 0.99152<br>8411 | + | . | domain<br>factors;sequence=ATC<br>ATTAA<br>TF=GSX2;class=Homeo                                      |
| NOX4 NM_00<br>1300995 | TFB<br>S | TFBS | 147      | 15<br>4  | 0.99152<br>4102 | + | . | domain<br>factors;sequence=GTC<br>ATTAA<br>TF=GSX2;class=Homeo                                      |
| NOX4 NM_00<br>1291929 | TFB<br>S | TFBS | 191<br>9 | 19<br>26 | 0.99152<br>4102 | + | . | domain<br>factors;sequence=GTC<br>ATTAA<br>TF=BHLHE22(var. 2);cl<br>ass=Basic                       |
| NOX4 NM_00<br>1143837 | TFB<br>S | TFBS | 149<br>8 | 15<br>07 | 0.99147<br>9147 | - | . | helix-loop-helix<br>factors<br>(bHLH);sequence=GCCA<br>GCTGCG<br>TF=BHLHE22(var. 2);cl<br>ass=Basic |
| NOX4 NM_00<br>1143837 | TFB<br>S | TFBS | 149<br>8 | 15<br>07 | 0.99147<br>0498 | + | . | helix-loop-helix<br>factors<br>(bHLH);sequence=CGCA<br>GCTGGC<br>TF=PDX1;class=Homeo                |
| NOX4 NM_00<br>1143837 | TFB<br>S | TFBS | 131<br>6 | 13<br>23 | 0.99144<br>1186 | + | . | domain<br>factors;sequence=ATA<br>ATTAG<br>TF=MYB;class=Tryptop<br>han cluster                      |
| NOX4 NM_00<br>1143837 | TFB<br>S | TFBS | 164<br>1 | 16<br>50 | 0.99143<br>7632 | - | . | factors;sequence=CCC<br>AACTGCT<br>TF=HOXD4;class=Homeo                                             |
| NOX4 NM_00<br>1300995 | TFB<br>S | TFBS | 187<br>1 | 18<br>78 | 0.99130<br>7845 | + | . | domain<br>factors;sequence=CTC<br>ATTAG<br>TF=HOXD4;class=Homeo                                     |
| NOX4 NM_00            | TFB      | TFBS | 412      | 41       | 0.99130         | + | . |                                                                                                     |

|                       |          |      |          |          |                 |   |   |                                                                 |
|-----------------------|----------|------|----------|----------|-----------------|---|---|-----------------------------------------------------------------|
| 1291929               | S        |      |          | 9        | 7845            |   |   | domain<br>factors;sequence=CTC<br>ATTAG<br>TF=HOXD4;class=Homeo |
| NOX4 NM_00<br>1291927 | TFB<br>S | TFBS | 630      | 63<br>7  | 0.99130<br>7845 | + | . | domain<br>factors;sequence=CTC<br>ATTAG<br>TF=HOXD4;class=Homeo |
| NOX4 NM_00<br>1291926 | TFB<br>S | TFBS | 102<br>7 | 10<br>34 | 0.99130<br>7845 | + | . | domain<br>factors;sequence=CTC<br>ATTAG<br>TF=HOXD4;class=Homeo |
| NOX4 NM_01<br>6931    | TFB<br>S | TFBS | 102<br>7 | 10<br>34 | 0.99130<br>7845 | + | . | domain<br>factors;sequence=CTC<br>ATTAG<br>TF=HOXD4;class=Homeo |
| NOX4 NM_00<br>1143836 | TFB<br>S | TFBS | 102<br>7 | 10<br>34 | 0.99130<br>7845 | + | . | domain<br>factors;sequence=CTC<br>ATTAG<br>TF=HOXD4;class=Homeo |
| NOX4 NR_12<br>0406    | TFB<br>S | TFBS | 102<br>7 | 10<br>34 | 0.99130<br>7845 | + | . | domain<br>factors;sequence=CTC<br>ATTAG<br>TF=TLX2;class=Homeo  |
| NOX4 NM_00<br>1300995 | TFB<br>S | TFBS | 746      | 75<br>3  | 0.99127<br>9322 | - | . | domain<br>factors;sequence=CCA<br>ATTAA<br>TF=TLX2;class=Homeo  |
| NOX4 NM_00<br>1300995 | TFB<br>S | TFBS | 171<br>8 | 17<br>25 | 0.99127<br>9322 | - | . | domain<br>factors;sequence=CCA<br>ATTAA<br>TF=TLX2;class=Homeo  |
| NOX4 NM_00<br>1291929 | TFB<br>S | TFBS | 259      | 26<br>6  | 0.99127<br>9322 | - | . | domain<br>factors;sequence=CCA<br>ATTAA<br>TF=TLX2;class=Homeo  |
| NOX4 NM_00<br>1291927 | TFB<br>S | TFBS | 477      | 48<br>4  | 0.99127<br>9322 | - | . | domain<br>factors;sequence=CCA<br>ATTAA<br>TF=TLX2;class=Homeo  |
| NOX4 NM_00<br>1291926 | TFB<br>S | TFBS | 874      | 88<br>1  | 0.99127<br>9322 | - | . | domain<br>factors;sequence=CCA<br>ATTAA<br>TF=TLX2;class=Homeo  |
| NOX4 NM_01            | TFB      | TFBS | 874      | 88       | 0.99127         | - | . | TF=TLX2;class=Homeo                                             |

|                       |          |      |          |          |                 |   |   |                                                                 |
|-----------------------|----------|------|----------|----------|-----------------|---|---|-----------------------------------------------------------------|
| 6931                  | S        |      |          | 1        | 9322            |   |   | domain<br>factors;sequence=CCA<br>ATTAA<br>TF=TLX2;class=Homeo  |
| NOX4 NM_00<br>1143836 | TFB<br>S | TFBS | 874      | 88<br>1  | 0.99127<br>9322 | - | . | domain<br>factors;sequence=CCA<br>ATTAA<br>TF=TLX2;class=Homeo  |
| NOX4 NR_12<br>0406    | TFB<br>S | TFBS | 874      | 88<br>1  | 0.99127<br>9322 | - | . | domain<br>factors;sequence=CCA<br>ATTAA<br>TF=BARX1;class=Homeo |
| NOX4 NM_00<br>1300995 | TFB<br>S | TFBS | 746      | 75<br>3  | 0.99126<br>4087 | - | . | domain<br>factors;sequence=CCA<br>ATTAA<br>TF=BARX1;class=Homeo |
| NOX4 NM_00<br>1300995 | TFB<br>S | TFBS | 171<br>8 | 17<br>25 | 0.99126<br>4087 | - | . | domain<br>factors;sequence=CCA<br>ATTAA<br>TF=BARX1;class=Homeo |
| NOX4 NM_00<br>1291929 | TFB<br>S | TFBS | 259      | 26<br>6  | 0.99126<br>4087 | - | . | domain<br>factors;sequence=CCA<br>ATTAA<br>TF=BARX1;class=Homeo |
| NOX4 NM_00<br>1291927 | TFB<br>S | TFBS | 477      | 48<br>4  | 0.99126<br>4087 | - | . | domain<br>factors;sequence=CCA<br>ATTAA<br>TF=BARX1;class=Homeo |
| NOX4 NM_00<br>1291926 | TFB<br>S | TFBS | 874      | 88<br>1  | 0.99126<br>4087 | - | . | domain<br>factors;sequence=CCA<br>ATTAA<br>TF=BARX1;class=Homeo |
| NOX4 NM_01<br>6931    | TFB<br>S | TFBS | 874      | 88<br>1  | 0.99126<br>4087 | - | . | domain<br>factors;sequence=CCA<br>ATTAA<br>TF=BARX1;class=Homeo |
| NOX4 NM_00<br>1143836 | TFB<br>S | TFBS | 874      | 88<br>1  | 0.99126<br>4087 | - | . | domain<br>factors;sequence=CCA<br>ATTAA<br>TF=BARX1;class=Homeo |
| NOX4 NR_12<br>0406    | TFB<br>S | TFBS | 874      | 88<br>1  | 0.99126<br>4087 | - | . | domain<br>factors;sequence=CCA<br>ATTAA<br>TF=BARX1;class=Homeo |
| NOX4 NM_00            | TFB      | TFBS | 182      | 18       | 0.99122         | - | . | TF=MNX1;class=Homeo                                             |

|                       |          |      |          |          |                 |   |   |                                                                                        |
|-----------------------|----------|------|----------|----------|-----------------|---|---|----------------------------------------------------------------------------------------|
| 1143837               | S        |      | 7        | 36       | 8646            |   |   | domain<br>factors;sequence=GAT<br>AATTAAA<br>TF=RHOXF1;class=Home<br>o domain          |
| NOX4 NM_00<br>1300995 | TFB<br>S | TFBS | 325      | 33<br>2  | 0.99107<br>5076 | + | . | factors;sequence=GTG<br>ATCCC<br>TF=NR2C1;class=Nucle<br>ar receptors with C4<br>zinc  |
| NOX4 NM_00<br>1300995 | TFB<br>S | TFBS | 231      | 23<br>9  | 0.99077<br>1625 | + | . | fingers;sequence=TGA<br>GGTCAG<br>TF=NR2C1;class=Nucle<br>ar receptors with C4<br>zinc |
| NOX4 NM_00<br>1300995 | TFB<br>S | TFBS | 218<br>7 | 21<br>95 | 0.99077<br>1625 | + | . | fingers;sequence=TGA<br>GGTCAG<br>TF=NR2C1;class=Nucle<br>ar receptors with C4<br>zinc |
| NOX4 NM_00<br>1143837 | TFB<br>S | TFBS | 218<br>7 | 21<br>95 | 0.99077<br>1625 | + | . | fingers;sequence=TGA<br>GGTCAG<br>TF=NR2C1;class=Nucle<br>ar receptors with C4<br>zinc |
| NOX4 NM_00<br>1291929 | TFB<br>S | TFBS | 218<br>7 | 21<br>95 | 0.99077<br>1625 | + | . | fingers;sequence=TGA<br>GGTCAG<br>TF=NR2C1;class=Nucle<br>ar receptors with C4<br>zinc |
| NOX4 NM_00<br>1291927 | TFB<br>S | TFBS | 218<br>7 | 21<br>95 | 0.99077<br>1625 | + | . | fingers;sequence=TGA<br>GGTCAG<br>TF=NR2C1;class=Nucle<br>ar receptors with C4<br>zinc |
| NOX4 NM_00<br>1291926 | TFB<br>S | TFBS | 218<br>7 | 21<br>95 | 0.99077<br>1625 | + | . | fingers;sequence=TGA<br>GGTCAG<br>TF=NR2C1;class=Nucle<br>ar receptors with C4<br>zinc |
| NOX4 NM_01<br>6931    | TFB<br>S | TFBS | 218<br>7 | 21<br>95 | 0.99077<br>1625 | + | . | fingers;sequence=TGA<br>GGTCAG<br>TF=NR2C1;class=Nucle<br>ar receptors with C4<br>zinc |
| NOX4 NM_00<br>1143836 | TFB<br>S | TFBS | 218<br>7 | 21<br>95 | 0.99077<br>1625 | + | . | TF=NR2C1;class=Nucle<br>ar receptors with C4                                           |

|                       |          |      |          |          |                 |   |   |  |                                                                          |
|-----------------------|----------|------|----------|----------|-----------------|---|---|--|--------------------------------------------------------------------------|
|                       |          |      |          |          |                 |   |   |  | zinc<br>fingers;sequence=TGA<br>GGTCAG<br>TF=HOXD4;class=Homeo<br>domain |
| NOX4 NM_00<br>1300995 | TFB<br>S | TFBS | 536      | 54<br>3  | 0.99063<br>8987 | + | . |  | factors;sequence=CTC<br>ATTAA<br>TF=HOXD4;class=Homeo<br>domain          |
| NOX4 NM_00<br>1300995 | TFB<br>S | TFBS | 540      | 54<br>7  | 0.99063<br>8987 | - | . |  | factors;sequence=CTC<br>ATTAA<br>TF=HOXD4;class=Homeo<br>domain          |
| NOX4 NM_00<br>1143837 | TFB<br>S | TFBS | 716      | 72<br>3  | 0.99063<br>8987 | + | . |  | factors;sequence=CTC<br>ATTAA<br>TF=HOXD4;class=Homeo<br>domain          |
| NOX4 NR_12<br>0406    | TFB<br>S | TFBS | 232<br>5 | 23<br>32 | 0.99063<br>8987 | + | . |  | factors;sequence=CTC<br>ATTAA<br>TF=HOXD4;class=Homeo<br>domain          |
| NOX4 NM_00<br>1143837 | TFB<br>S | TFBS | 510      | 51<br>7  | 0.99053<br>1244 | + | . |  | factors;sequence=CTC<br>ATTAA<br>TF=OTX1;class=Homeo<br>domain           |
| NOX4 NM_00<br>1143837 | TFB<br>S | TFBS | 178<br>7 | 17<br>94 | 0.99049<br>7575 | - | . |  | factors;sequence=TTA<br>ATCCC<br>TF=RHOXF1;class=Home<br>o domain        |
| NOX4 NM_00<br>1300995 | TFB<br>S | TFBS | 241<br>2 | 24<br>23 | 0.99032<br>6324 | + | . |  | factors;sequence=GTA<br>ATCCA<br>TF=ZNF384;class=C2H2<br>zinc finger     |
| NOX4 NM_00<br>1300995 | TFB<br>S | TFBS | 822      | 83<br>3  | 0.99032<br>6324 | - | . |  | factors;sequence=TCA<br>AAAAAAAAA<br>TF=ZNF384;class=C2H2<br>zinc finger |
| NOX4 NM_00<br>1143837 | TFB<br>S | TFBS | 241<br>2 | 24<br>23 | 0.99032<br>6324 | + | . |  | factors;sequence=TCA<br>AAAAAAAAA<br>TF=ZNF384;class=C2H2<br>zinc finger |
| NOX4 NM_00<br>1291929 | TFB<br>S | TFBS | 241<br>2 | 24<br>23 | 0.99032<br>6324 | + | . |  | factors;sequence=TCA<br>AAAAAAAAA<br>TF=ZNF384;class=C2H2<br>zinc finger |
| NOX4 NM_00            | TFB      | TFBS | 241      | 24       | 0.99032         | + | . |  | factors;sequence=TCA<br>AAAAAAAAA<br>TF=ZNF384;class=C2H2                |

|                       |          |      |          |          |                 |   |   |                                                                              |
|-----------------------|----------|------|----------|----------|-----------------|---|---|------------------------------------------------------------------------------|
| 1291927               | S        |      | 2        | 23       | 6324            |   |   | zinc finger<br>factors;sequence=TCA<br>AAAAAAAAA                             |
| NOX4 NM_00<br>1291926 | TFB<br>S | TFBS | 241<br>2 | 24<br>23 | 0.99032<br>6324 | + | . | TF=ZNF384;class=C2H2<br>zinc finger<br>factors;sequence=TCA<br>AAAAAAAAA     |
| NOX4 NM_01<br>6931    | TFB<br>S | TFBS | 241<br>2 | 24<br>23 | 0.99032<br>6324 | + | . | TF=ZNF384;class=C2H2<br>zinc finger<br>factors;sequence=TCA<br>AAAAAAAAA     |
| NOX4 NM_00<br>1143836 | TFB<br>S | TFBS | 241<br>2 | 24<br>23 | 0.99032<br>6324 | + | . | TF=ZNF384;class=C2H2<br>zinc finger<br>factors;sequence=TCA<br>AAAAAAAAA     |
| NOX4 NM_00<br>1291929 | TFB<br>S | TFBS | 171<br>6 | 17<br>23 | 0.99032<br>5926 | + | . | TF=GATA3;class=Other<br>C4 zinc finger-type<br>factors;sequence=AGA<br>TAACA |
| NOX4 NM_00<br>1291927 | TFB<br>S | TFBS | 193<br>4 | 19<br>41 | 0.99032<br>5926 | + | . | TF=GATA3;class=Other<br>C4 zinc finger-type<br>factors;sequence=AGA<br>TAACA |
| NOX4 NM_00<br>1143837 | TFB<br>S | TFBS | 131<br>6 | 13<br>23 | 0.99025<br>0825 | - | . | TF=PRRX2;class=Homeo<br>domain<br>factors;sequence=CTA<br>ATTAT              |
| NOX4 NM_00<br>1300995 | TFB<br>S | TFBS | 154<br>3 | 15<br>50 | 0.99019<br>2875 | + | . | TF=FOXG1;class=Fork<br>head / winged helix<br>factors;sequence=ATA<br>AACAA  |
| NOX4 NM_00<br>1143837 | TFB<br>S | TFBS | 288      | 29<br>5  | 0.99019<br>2875 | - | . | TF=FOXG1;class=Fork<br>head / winged helix<br>factors;sequence=ATA<br>AACAA  |
| NOX4 NM_00<br>1291929 | TFB<br>S | TFBS | 84       | 91       | 0.99019<br>2875 | + | . | TF=FOXG1;class=Fork<br>head / winged helix<br>factors;sequence=ATA<br>AACAA  |
| NOX4 NM_00<br>1291927 | TFB<br>S | TFBS | 302      | 30<br>9  | 0.99019<br>2875 | + | . | TF=FOXG1;class=Fork<br>head / winged helix<br>factors;sequence=ATA<br>AACAA  |
| NOX4 NM_00            | TFB      | TFBS | 699      | 70       | 0.99019         | + | . | TF=FOXG1;class=Fork                                                          |

|                       |          |      |          |          |                 |   |   |                                                                             |
|-----------------------|----------|------|----------|----------|-----------------|---|---|-----------------------------------------------------------------------------|
| 1291926               | S        |      |          | 6        | 2875            |   |   | head / winged helix<br>factors;sequence=ATA<br>AACAA<br>TF=FOXG1;class=Fork |
| NOX4 NM_01<br>6931    | TFB<br>S | TFBS | 699      | 70<br>6  | 0.99019<br>2875 | + | . | head / winged helix<br>factors;sequence=ATA<br>AACAA<br>TF=FOXG1;class=Fork |
| NOX4 NM_00<br>1143836 | TFB<br>S | TFBS | 699      | 70<br>6  | 0.99019<br>2875 | + | . | head / winged helix<br>factors;sequence=ATA<br>AACAA<br>TF=FOXG1;class=Fork |
| NOX4 NR_12<br>0406    | TFB<br>S | TFBS | 699      | 70<br>6  | 0.99019<br>2875 | + | . | head / winged helix<br>factors;sequence=ATA<br>AACAA<br>TF=FOXG1;class=Fork |
| NOX4 NM_00<br>1300995 | TFB<br>S | TFBS | 746      | 75<br>3  | 0.99013<br>5478 | - | . | domain<br>factors;sequence=CCA<br>ATTAA<br>TF=LHX9;class=Homeo              |
| NOX4 NM_00<br>1300995 | TFB<br>S | TFBS | 171<br>8 | 17<br>25 | 0.99013<br>5478 | - | . | domain<br>factors;sequence=CCA<br>ATTAA<br>TF=LHX9;class=Homeo              |
| NOX4 NM_00<br>1291929 | TFB<br>S | TFBS | 259      | 26<br>6  | 0.99013<br>5478 | - | . | domain<br>factors;sequence=CCA<br>ATTAA<br>TF=LHX9;class=Homeo              |
| NOX4 NM_00<br>1291927 | TFB<br>S | TFBS | 477      | 48<br>4  | 0.99013<br>5478 | - | . | domain<br>factors;sequence=CCA<br>ATTAA<br>TF=LHX9;class=Homeo              |
| NOX4 NM_00<br>1291926 | TFB<br>S | TFBS | 874      | 88<br>1  | 0.99013<br>5478 | - | . | domain<br>factors;sequence=CCA<br>ATTAA<br>TF=LHX9;class=Homeo              |
| NOX4 NM_01<br>6931    | TFB<br>S | TFBS | 874      | 88<br>1  | 0.99013<br>5478 | - | . | domain<br>factors;sequence=CCA<br>ATTAA<br>TF=LHX9;class=Homeo              |
| NOX4 NM_00<br>1143836 | TFB<br>S | TFBS | 874      | 88<br>1  | 0.99013<br>5478 | - | . | domain<br>factors;sequence=CCA<br>ATTAA<br>TF=LHX9;class=Homeo              |
| NOX4 NR_12            | TFB      | TFBS | 874      | 88       | 0.99013         | - | . | TF=LHX9;class=Homeo                                                         |

|                       |          |      |          |          |                 |   |   |                                                                             |
|-----------------------|----------|------|----------|----------|-----------------|---|---|-----------------------------------------------------------------------------|
| 0406                  | S        |      |          | 1        | 5478            |   |   | domain<br>factors;sequence=CCA<br>ATTAA<br>TF=RHOXF1;class=Home<br>o domain |
| NOX4 NM_00<br>1300995 | TFB<br>S | TFBS | 105<br>2 | 10<br>59 | 0.99002<br>1423 | + | · | factors;sequence=GTG<br>ATCCA<br>TF=RHOXF1;class=Home<br>o domain           |
| NOX4 NM_00<br>1300995 | TFB<br>S | TFBS | 222      | 22<br>9  | 0.99002<br>1423 | - | · | factors;sequence=GTG<br>ATCCA<br>TF=RHOXF1;class=Home<br>o domain           |
| NOX4 NM_00<br>1291926 | TFB<br>S | TFBS | 208      | 21<br>5  | 0.99002<br>1423 | + | · | factors;sequence=GTG<br>ATCCA<br>TF=RHOXF1;class=Home<br>o domain           |
| NOX4 NM_01<br>6931    | TFB<br>S | TFBS | 208      | 21<br>5  | 0.99002<br>1423 | + | · | factors;sequence=GTG<br>ATCCA<br>TF=RHOXF1;class=Home<br>o domain           |
| NOX4 NM_00<br>1143836 | TFB<br>S | TFBS | 208      | 21<br>5  | 0.99002<br>1423 | + | · | factors;sequence=GTG<br>ATCCA<br>TF=RHOXF1;class=Home<br>o domain           |
| NOX4 NR_12<br>0406    | TFB<br>S | TFBS | 208      | 21<br>5  | 0.99002<br>1423 | + | · | factors;sequence=GTG<br>ATCCA<br>TF=RHOXF1;class=Home<br>o domain           |
| NOX4 NR_12<br>0406    | TFB<br>S | TFBS | 216<br>6 | 21<br>73 | 0.99002<br>1423 | - | · | factors;sequence=GTG<br>ATCCA                                               |

---
