# Supplementary material for: Development of a Ferroptosis-Related lncRNA Signature to Predict the Prognosis and Immune Landscape of Bladder Cancer
Source: Hindawi journal article supplement (doi:10.1155/2021/1031906), 2021-06-20
Supplement: f1 [file 1031906.f1.zip]

Supplementary Table S7. The prediction of the transcription factors of AC090825.1.

| seqname                  | source | feature | start | end  | score | strand | frame | attributes                                                          |
|--------------------------|--------|---------|-------|------|-------|--------|-------|---------------------------------------------------------------------|
| AC090825.1 N<br>R_135737 | TFBS   | TFBS    | 565   | 570  | 1     | -      | .     | TF=ZNF354C;class=C2H2 zinc finger factors;sequence=ATCACAC          |
| AC090825.1 N<br>R_135737 | TFBS   | TFBS    | 2021  | 2026 | 1     | -      | .     | TF=ZNF354C;class=C2H2 zinc finger factors;sequence=ATCACAC          |
| AC090825.1 N<br>R_135737 | TFBS   | TFBS    | 1588  | 1594 | 1     | +      | .     | TF=NFATC2;class=Rel homology region (RHR) factors;sequence=TTT TCCA |
| AC090825.1 N<br>R_135737 | TFBS   | TFBS    | 1947  | 1956 | 1     | +      | .     | TF=KLF5;class=C2H2 zinc finger factors;sequence=GCC CCGCCCC         |
| AC090825.1 N<br>R_135737 | TFBS   | TFBS    | 1952  | 1961 | 1     | +      | .     | TF=KLF5;class=C2H2 zinc finger factors;sequence=GCC CCGCCCC         |
| AC090825.1 N<br>R_135737 | TFBS   | TFBS    | 2261  | 2268 | 1     | -      | .     | TF=LBX1;class=Homeo domain factors;sequence=TTA ATTAG               |
| AC090825.1 N<br>R_135737 | TFBS   | TFBS    | 2260  | 2269 | 1     | +      | .     | TF=ALX3;class=Homeo domain factors;sequence=TCT AATTAAA             |
| AC090825.1 N<br>R_135737 | TFBS   | TFBS    | 2261  | 2268 | 1     | +      | .     | TF=ISX;class=Homeo domain factors;sequence=CTA ATTAA                |
| AC090825.1 N<br>R_135737 | TFBS   | TFBS    | 2261  | 2268 | 1     | +      | .     | TF=NKX6-2;class=Homeo domain factors;sequence=CTA ATTAA             |
| AC090825.1 N<br>R_135737 | TFBS   | TFBS    | 292   | 300  | 1     | -      | .     | TF=PITX3;class=Homeo domain factors;sequence=CTT AATCCC             |
| AC090825.1 N             | TFBS   | TFBS    | 226   | 22   | 1     | +      | .     | TF=PRRX1;class=Homeo                                                |

|                          |        |          |      |          |          |   |   |   |                                                                                    |
|--------------------------|--------|----------|------|----------|----------|---|---|---|------------------------------------------------------------------------------------|
| R_135737                 | S      |          |      | 1        | 68       |   |   |   | domain<br>factors;sequence=CTA<br>ATTAA<br>TF=UNCX;class=Homeo                     |
| AC090825.1  <br>R_135737 | N<br>S | TFB<br>S | TFBS | 226<br>1 | 22<br>68 | 1 | + | . | domain<br>factors;sequence=CTA<br>ATTAA<br>TF=MEIS1;class=Homeo                    |
| AC090825.1  <br>R_135737 | N<br>S | TFB<br>S | TFBS | 148<br>7 | 14<br>93 | 1 | + | . | domain<br>factors;sequence=TTG<br>ACAG<br>TF=MEIS3;class=Homeo                     |
| AC090825.1  <br>R_135737 | N<br>S | TFB<br>S | TFBS | 148<br>7 | 14<br>94 | 1 | + | . | domain<br>factors;sequence=TTG<br>ACAGG<br>TF=RBPJ;class=Rel                       |
| AC090825.1  <br>R_135737 | N<br>S | TFB<br>S | TFBS | 981      | 99<br>0  | 1 | - | . | homology region (RHR)<br>factors;sequence=CCT<br>GGGAAAG<br>TF=ZNF384;class=C2H2   |
| AC090825.1  <br>R_135737 | N<br>S | TFB<br>S | TFBS | 301      | 31<br>2  | 1 | + | . | zinc finger<br>factors;sequence=TTT<br>AAAAAAAAA<br>TF=VDR;class=Nuclear           |
| AC090825.1  <br>R_135737 | N<br>S | TFB<br>S | TFBS | 711      | 71<br>8  | 1 | - | . | receptors with C4<br>zinc<br>fingers;sequence=TGA<br>GTTCA<br>TF=VDR;class=Nuclear |
| AC090825.1  <br>R_135737 | N<br>S | TFB<br>S | TFBS | 238<br>9 | 23<br>96 | 1 | - | . | receptors with C4<br>zinc<br>fingers;sequence=TGA<br>GTTCA<br>TF=ARGFX;class=Homeo |
| AC090825.1  <br>R_135737 | N<br>S | TFB<br>S | TFBS | 226<br>0 | 22<br>69 | 1 | + | . | domain<br>factors;sequence=TCT<br>AATTAAA<br>TF=KLF15;class=C2H2                   |
| AC090825.1  <br>R_135737 | N<br>S | TFB<br>S | TFBS | 195<br>2 | 19<br>62 | 1 | + | . | zinc finger<br>factors;sequence=GCC<br>CCGCCCCC<br>TF=ZNF460;class=C2H2            |
| AC090825.1  <br>R_135737 | N<br>S | TFB<br>S | TFBS | 114<br>2 | 11<br>57 | 1 | + | . | zinc finger<br>factors;sequence=GCC                                                |

|                |     |      |     |    |        |   |   |  |                                                         |
|----------------|-----|------|-----|----|--------|---|---|--|---------------------------------------------------------|
| AC090825.1   N | TFB | TFBS | 226 | 22 |        |   |   |  | TCAGCCTCCCGAG                                           |
| R_135737       | S   |      | 1   | 68 | 1      | + | . |  | TF=LHX9;class=Homeo domain factors;sequence=CTA ATTAA   |
| AC090825.1   N | TFB | TFBS | 226 | 22 |        |   |   |  | TF=PRRX2;class=Homeo domain factors;sequence=CTA ATTAA  |
| R_135737       | S   |      | 1   | 68 | 1      | + | . |  |                                                         |
| AC090825.1   N | TFB | TFBS | 292 | 29 | 0.9998 |   |   |  | TF=RHOXF1;class=Homeo domain factors;sequence=TTA ATCCC |
| R_135737       | S   |      |     | 9  | 52312  | - | . |  |                                                         |
| AC090825.1   N | TFB | TFBS | 226 | 22 | 0.9992 |   |   |  | TF=SHOX;class=Homeo domain factors;sequence=TTA ATTAG   |
| R_135737       | S   |      | 1   | 68 | 22304  | - | . |  |                                                         |
| AC090825.1   N | TFB | TFBS | 130 | 13 | 0.9991 |   |   |  | TF=MEIS1;class=Homeo domain factors;sequence=ATG ACAG   |
| R_135737       | S   |      | 0   | 06 | 27731  | + | . |  |                                                         |
| AC090825.1   N | TFB | TFBS | 143 | 14 | 0.9991 |   |   |  | TF=MEIS1;class=Homeo domain factors;sequence=ATG ACAG   |
| R_135737       | S   |      | 4   | 40 | 27731  | + | . |  |                                                         |
| AC090825.1   N | TFB | TFBS | 168 | 16 | 0.9991 |   |   |  | TF=MEIS1;class=Homeo domain factors;sequence=ATG ACAG   |
| R_135737       | S   |      | 0   | 86 | 27731  | + | . |  |                                                         |
| AC090825.1   N | TFB | TFBS | 226 | 22 | 0.9990 |   |   |  | TF=RAX2;class=Homeo domain factors;sequence=CTA ATTAA   |
| R_135737       | S   |      | 1   | 68 | 94201  | + | . |  |                                                         |
| AC090825.1   N | TFB | TFBS | 226 | 22 | 0.9988 |   |   |  | TF=NKX6-1;class=Homeo domain factors;sequence=CTA ATTAA |
| R_135737       | S   |      | 1   | 68 | 97959  | + | . |  |                                                         |
| AC090825.1   N | TFB | TFBS | 211 | 21 | 0.9987 |   |   |  | TF=RHOXF1;class=Homeo domain factors;sequence=TTA ATCCA |
| R_135737       | S   |      | 1   | 18 | 98659  | - | . |  |                                                         |
| AC090825.1   N | TFB | TFBS | 226 | 22 | 0.9987 |   |   |  | TF=LHX5;class=Homeo domain factors;sequence=CTA         |
| R_135737       | S   |      | 1   | 68 | 12673  | + | . |  |                                                         |

|                |     |      |     |    |        |   |   |                                                                                |
|----------------|-----|------|-----|----|--------|---|---|--------------------------------------------------------------------------------|
| AC090825.1   N | TFB | TFBS | 226 | 22 | 0.9986 | - | · | ATTAA                                                                          |
| R_135737       | S   |      | 1   | 68 | 36203  |   |   | TF=TLX2;class=Homeo domain factors;sequence=TTAATTAG                           |
| AC090825.1   N | TFB | TFBS | 226 | 22 | 0.9984 | + | · | TF=MIXL1;class=Homeo domain factors;sequence=TCTAATTAAA                        |
| R_135737       | S   |      | 0   | 69 | 79883  |   |   | TF=MEIS2;class=Homeo domain factors;sequence=TTGACAGG                          |
| AC090825.1   N | TFB | TFBS | 148 | 14 | 0.9983 | + | · | TF=PITX2;class=Homeo domain factors;sequence=TTAATCCC                          |
| R_135737       | S   |      | 7   | 94 | 31277  |   |   | TF=MYB;class=Tryptophan cluster factors;sequence=ACCAACTGTA                    |
| AC090825.1   N | TFB | TFBS | 777 | 78 | 0.9956 | - | · | TF=NR2C2(var.2);class=Nuclear receptors with C4 zinc fingers;sequence=GAGGTCAG |
| R_135737       | S   |      | 7   | 64 | 37296  |   |   | TF=NR2C2(var.2);class=Nuclear receptors with C4 zinc fingers;sequence=GAGGTCAG |
| AC090825.1   N | TFB | TFBS | 139 | 13 | 0.9952 | - | · | TF=MEIS1;class=Homeo domain factors;sequence=CTGACAG                           |
| R_135737       | S   |      | 1   | 98 | 37296  |   |   | TF=MEIS1;class=Homeo domain factors;sequence=CTGACAG                           |
| AC090825.1   N | TFB | TFBS | 683 | 68 | 0.9949 | + | · | TF=ZNF384;class=C2H2 zinc finger factors;sequence=TTAAAAAAAAAA                 |
| R_135737       | S   |      | 9   | 9  | 89704  |   |   | TF=NR2C1;class=Nucle                                                           |
| AC090825.1   N | TFB | TFBS | 173 | 17 | 0.9949 | - | · |                                                                                |
| R_135737       | S   |      | 4   | 40 | 89704  |   |   |                                                                                |
| AC090825.1   N | TFB | TFBS | 302 | 31 | 0.9949 | + | · |                                                                                |
| R_135737       | S   |      | 3   | 3  | 14257  |   |   |                                                                                |
| AC090825.1   N | TFB | TFBS | 125 | 12 | 0.9948 | - | · |                                                                                |

|                          |        |          |      |          |          |                 |   |                                                                                                                                                                                                                                                                                                                                                                                                                                                                                                                                                                                                                                                                                                                                                                                                    |
|--------------------------|--------|----------|------|----------|----------|-----------------|---|----------------------------------------------------------------------------------------------------------------------------------------------------------------------------------------------------------------------------------------------------------------------------------------------------------------------------------------------------------------------------------------------------------------------------------------------------------------------------------------------------------------------------------------------------------------------------------------------------------------------------------------------------------------------------------------------------------------------------------------------------------------------------------------------------|
| R_135737                 | S      |          | 7    | 65       | 46925    |                 |   | ar receptors with C4<br>zinc<br>fingers;sequence=CGA<br>GGTCAG<br>TF=NR2C1;class=Nucle<br>ar receptors with C4<br>zinc<br>fingers;sequence=CGA<br>GGTCAG<br>TF=ZNF384;class=C2H2<br>zinc finger<br>factors;sequence=TAA<br>AAAAAAAAA<br>TF=PITX1;class=Homeo<br>domain<br>factors;sequence=TTA<br>ATCCC<br>TF=ZNF354C;class=C2H<br>2 zinc finger<br>factors;sequence=CTC<br>CAC<br>TF=TEAD3;class=TEA<br>domain<br>factors;sequence=ACA<br>TTCCT<br>TF=HOXC4;class=Homeo<br>domain<br>factors;sequence=CTC<br>ATTAA<br>TF=DRGX;class=Homeo<br>domain<br>factors;sequence=TTA<br>ATTAG<br>TF=PDX1;class=Homeo<br>domain<br>factors;sequence=CTA<br>ATTAA<br>TF=ZNF384;class=C2H2<br>zinc finger<br>factors;sequence=AAA<br>AAAAAAAAA<br>TF=ZNF384;class=C2H2<br>zinc finger<br>factors;sequence=AAA |
| AC090825.1  <br>R_135737 | N<br>S | TFB<br>S | TFBS | 139<br>1 | 13<br>99 | 0.9948<br>46925 | - | .                                                                                                                                                                                                                                                                                                                                                                                                                                                                                                                                                                                                                                                                                                                                                                                                  |
| AC090825.1  <br>R_135737 | N<br>S | TFB<br>S | TFBS | 303      | 31<br>4  | 0.9948<br>32864 | + | .                                                                                                                                                                                                                                                                                                                                                                                                                                                                                                                                                                                                                                                                                                                                                                                                  |
| AC090825.1  <br>R_135737 | N<br>S | TFB<br>S | TFBS | 292      | 29<br>9  | 0.9947<br>78353 | - | .                                                                                                                                                                                                                                                                                                                                                                                                                                                                                                                                                                                                                                                                                                                                                                                                  |
| AC090825.1  <br>R_135737 | N<br>S | TFB<br>S | TFBS | 181<br>1 | 18<br>16 | 0.9940<br>48003 | + | .                                                                                                                                                                                                                                                                                                                                                                                                                                                                                                                                                                                                                                                                                                                                                                                                  |
| AC090825.1  <br>R_135737 | N<br>S | TFB<br>S | TFBS | 823      | 83<br>0  | 0.9937<br>95438 | - | .                                                                                                                                                                                                                                                                                                                                                                                                                                                                                                                                                                                                                                                                                                                                                                                                  |
| AC090825.1  <br>R_135737 | N<br>S | TFB<br>S | TFBS | 121      | 12<br>8  | 0.9937<br>04332 | + | .                                                                                                                                                                                                                                                                                                                                                                                                                                                                                                                                                                                                                                                                                                                                                                                                  |
| AC090825.1  <br>R_135737 | N<br>S | TFB<br>S | TFBS | 226<br>1 | 22<br>68 | 0.9936<br>95647 | - | .                                                                                                                                                                                                                                                                                                                                                                                                                                                                                                                                                                                                                                                                                                                                                                                                  |
| AC090825.1  <br>R_135737 | N<br>S | TFB<br>S | TFBS | 226<br>1 | 22<br>68 | 0.9934<br>80683 | + | .                                                                                                                                                                                                                                                                                                                                                                                                                                                                                                                                                                                                                                                                                                                                                                                                  |
| AC090825.1  <br>R_135737 | N<br>S | TFB<br>S | TFBS | 304      | 31<br>5  | 0.9932<br>30986 | + | .                                                                                                                                                                                                                                                                                                                                                                                                                                                                                                                                                                                                                                                                                                                                                                                                  |
| AC090825.1  <br>R_135737 | N<br>S | TFB<br>S | TFBS | 305      | 31<br>6  | 0.9932<br>30986 | + | .                                                                                                                                                                                                                                                                                                                                                                                                                                                                                                                                                                                                                                                                                                                                                                                                  |

|                |     |      |     |    |        |   |   |                                                                                       |
|----------------|-----|------|-----|----|--------|---|---|---------------------------------------------------------------------------------------|
| AC090825.1   N | TFB | TFBS | 306 | 31 | 0.9932 | + | · | AAAAAAAAA<br>TF=ZNF384;class=C2H2<br>zinc finger<br>factors;sequence=AAA<br>AAAAAAAAA |
| R_135737       | S   |      |     | 7  | 30986  |   |   |                                                                                       |
| AC090825.1   N | TFB | TFBS | 103 | 10 | 0.9932 | - | · | TF=ZNF384;class=C2H2<br>zinc finger<br>factors;sequence=AAA<br>AAAAAAAAA              |
| R_135737       | S   |      | 2   | 43 | 30986  |   |   |                                                                                       |
| AC090825.1   N | TFB | TFBS | 103 | 10 | 0.9932 | - | · | TF=ZNF384;class=C2H2<br>zinc finger<br>factors;sequence=AAA<br>AAAAAAAAA              |
| R_135737       | S   |      | 3   | 44 | 30986  |   |   |                                                                                       |
| AC090825.1   N | TFB | TFBS | 103 | 10 | 0.9932 | - | · | TF=ZNF384;class=C2H2<br>zinc finger<br>factors;sequence=AAA<br>AAAAAAAAA              |
| R_135737       | S   |      | 4   | 45 | 30986  |   |   |                                                                                       |
| AC090825.1   N | TFB | TFBS | 103 | 10 | 0.9932 | - | · | TF=ZNF384;class=C2H2<br>zinc finger<br>factors;sequence=AAA<br>AAAAAAAAA              |
| R_135737       | S   |      | 5   | 46 | 30986  |   |   |                                                                                       |
| AC090825.1   N | TFB | TFBS | 103 | 10 | 0.9932 | - | · | TF=ZNF384;class=C2H2<br>zinc finger<br>factors;sequence=AAA<br>AAAAAAAAA              |
| R_135737       | S   |      | 6   | 47 | 30986  |   |   |                                                                                       |
| AC090825.1   N | TFB | TFBS | 194 | 19 | 0.9931 | + | · | TF=KLF15;class=C2H2<br>zinc finger<br>factors;sequence=GCC<br>CCGCCCCG                |
| R_135737       | S   |      | 7   | 57 | 84677  |   |   |                                                                                       |
| AC090825.1   N | TFB | TFBS | 226 | 22 | 0.9929 | - | · | TF=MIXL1;class=Homeo<br>domain<br>factors;sequence=TTT<br>AATTAGA                     |
| R_135737       | S   |      | 0   | 69 | 52069  |   |   |                                                                                       |
| AC090825.1   N | TFB | TFBS | 226 | 22 | 0.9928 | + | · | TF=DRGX;class=Homeo<br>domain<br>factors;sequence=CTA<br>ATTAA                        |
| R_135737       | S   |      | 1   | 68 | 6404   |   |   |                                                                                       |
| AC090825.1   N | TFB | TFBS | 226 | 22 | 0.9922 | + | · | TF=GSX2;class=Homeo<br>domain<br>factors;sequence=CTA<br>ATTAA                        |
| R_135737       | S   |      | 1   | 68 | 69432  |   |   |                                                                                       |
| AC090825.1   N | TFB | TFBS | 226 | 22 | 0.9920 | + | · | TF=TLX2;class=Homeo<br>domain<br>factors;sequence=CTA                                 |
| R_135737       | S   |      | 1   | 68 | 6191   |   |   |                                                                                       |

|                          |          |      |          |          |                 |   |   |                                                                                                                                                                                                                                                                                                                                                                                                                                                                                                                                                      |
|--------------------------|----------|------|----------|----------|-----------------|---|---|------------------------------------------------------------------------------------------------------------------------------------------------------------------------------------------------------------------------------------------------------------------------------------------------------------------------------------------------------------------------------------------------------------------------------------------------------------------------------------------------------------------------------------------------------|
| AC090825.1 N<br>R_135737 | TFB<br>S | TFBS | 226<br>1 | 22<br>68 | 0.9915<br>4001  | + | · | ATTAATF=DLX6;class=Homeo<br>domain<br>factors;sequence=CTA<br>ATTAATF=NFATC4;class=Rel<br>homology region (RHR)<br>factors;sequence=GAT<br>GGAAAAATTF=HOXD4;class=Homeo<br>domain<br>factors;sequence=CTC<br>ATTAATF=MNX1;class=Homeo<br>domain<br>factors;sequence=TCT<br>AATTAAATF=OTX1;class=Homeo<br>domain<br>factors;sequence=TTA<br>ATCCCTF=ZNF384;class=C2H2<br>zinc finger<br>factors;sequence=TCA<br>AAAAAAAAATF=EMX1;class=Homeo<br>domain<br>factors;sequence=TTA<br>ATTAGTF=MEIS1;class=Homeo<br>domain<br>factors;sequence=TTG<br>ACAA |
| AC090825.1 N<br>R_135737 | TFB<br>S | TFBS | 158<br>7 | 15<br>96 | 0.9909<br>14365 | - | · |                                                                                                                                                                                                                                                                                                                                                                                                                                                                                                                                                      |
| AC090825.1 N<br>R_135737 | TFB<br>S | TFBS | 121      | 12<br>8  | 0.9906<br>38987 | + | · |                                                                                                                                                                                                                                                                                                                                                                                                                                                                                                                                                      |
| AC090825.1 N<br>R_135737 | TFB<br>S | TFBS | 226<br>0 | 22<br>69 | 0.9905<br>91174 | + | · |                                                                                                                                                                                                                                                                                                                                                                                                                                                                                                                                                      |
| AC090825.1 N<br>R_135737 | TFB<br>S | TFBS | 292      | 29<br>9  | 0.9905<br>31244 | - | · |                                                                                                                                                                                                                                                                                                                                                                                                                                                                                                                                                      |
| AC090825.1 N<br>R_135737 | TFB<br>S | TFBS | 103<br>8 | 10<br>49 | 0.9903<br>26324 | - | · |                                                                                                                                                                                                                                                                                                                                                                                                                                                                                                                                                      |
| AC090825.1 N<br>R_135737 | TFB<br>S | TFBS | 226<br>1 | 22<br>68 | 0.9901<br>78233 | - | · |                                                                                                                                                                                                                                                                                                                                                                                                                                                                                                                                                      |
| AC090825.1 N<br>R_135737 | TFB<br>S | TFBS | 224<br>7 | 22<br>53 | 0.9901<br>62411 | + | · |                                                                                                                                                                                                                                                                                                                                                                                                                                                                                                                                                      |
