# Supplementary material for: Development of a Ferroptosis-Related lncRNA Signature to Predict the Prognosis and Immune Landscape of Bladder Cancer
Source: Hindawi journal article supplement (doi:10.1155/2021/1031906), 2021-06-20
Supplement: f1 [file 1031906.f1.zip]

Supplementary Table S4. Enrichment results from LncSEA website.

| Class                | Sub_Class                                   | Sim<br>pson | P-value      | FDR          | Bonferroni   | Jaccard         | Input_<br>number |
|----------------------|---------------------------------------------|-------------|--------------|--------------|--------------|-----------------|------------------|
| Disease              | LncRNADisease2.0                            | 0.5         | 3.21<br>E-07 | 0.00<br>0124 | 0.000<br>124 | 0.0<br>789      | 36               |
| Disease              | Lnc2Cancer2.0                               | 0.3<br>33   | 9.78<br>E-05 | 0.01<br>47   | 0.014<br>8   | 0.0<br>513      | 36               |
| Disease              | Lnc2Cancer2.0                               | 0.1<br>11   | 0.00<br>0195 | 0.01<br>47   | 0.029<br>4   | 0.0<br>28       | 36               |
| Cancer_Hallmark      | —                                           | 0.0<br>833  | 0.00<br>431  | 0.03<br>02   | 0.030<br>2   | 0.0<br>189      | 36               |
| Cancer_Ph<br>enotype | Malignant_neoplasm_of_<br>colon_with_rectum | 0.1<br>11   | 2.62<br>E-05 | 0.00<br>0393 | 0.000<br>393 | 0.0<br>408      | 36               |
| Cancer_Ph<br>enotype | Breast_Carcinoma                            | 0.2<br>86   | 0.00<br>0137 | 0.01<br>01   | 0.010<br>1   | 0.0<br>5        | 36               |
| Cancer_Ph<br>enotype | Esophageal_carcinoma                        | 0.2<br>22   | 0.00<br>0234 | 0.00<br>515  | 0.005<br>15  | 0.0<br>476      | 36               |
| Cancer_Ph<br>enotype | Malignant_neoplasm_of_<br>colon_with_rectum | 0.0<br>833  | 0.00<br>0659 | 0.00<br>494  | 0.009<br>88  | 0.0<br>306      | 36               |
| Cancer_Ph<br>enotype | Stomach_Carcinoma                           | 0.1<br>25   | 0.00<br>077  | 0.01<br>86   | 0.029<br>3   | 0.0<br>408      | 36               |
| Cancer_Ph<br>enotype | Stomach_Carcinoma                           | 0.1<br>11   | 0.00<br>0979 | 0.01<br>86   | 0.037<br>2   | 0.0<br>392      | 36               |
| Cancer_Ph<br>enotype | Malignant_neoplasm_of_<br>colon_with_rectum | 0.1<br>39   | 0.00<br>213  | 0.00<br>979  | 0.032<br>13  | 0.0<br>13       | 36               |
| Cancer_Ph<br>enotype | Malignant_neoplasm_of_<br>colon_with_rectum | 0.1<br>39   | 0.00<br>261  | 0.00<br>979  | 0.039<br>2   | 0.0<br>124      | 36               |
| Cancer_Ph<br>enotype | Carcinoma_of_bladder                        | 0.1<br>67   | 0.00<br>297  | 0.01<br>15   | 0.026<br>7   | 0.0<br>102      | 36               |
| Cancer_Ph<br>enotype | Carcinoma_of_bladder                        | 0.1<br>67   | 0.00<br>321  | 0.01<br>15   | 0.028<br>9   | 0.0<br>1        | 36               |
| Cancer_Ph<br>enotype | Carcinoma_of_bladder                        | 0.1<br>67   | 0.00<br>384  | 0.01<br>15   | 0.034<br>6   | 0.0<br>096<br>8 | 36               |
| Cancer_Ph<br>enotype | Colorectal_Carcinoma                        | 0.5         | 0.00<br>519  | 0.00<br>519  | 0.005<br>19  | 0.0<br>278      | 36               |
