# Supplementary figures and images for: Development of a Ferroptosis-Related lncRNA Signature to Predict the Prognosis and Immune Landscape of Bladder Cancer
Source: Hindawi journal article supplement (doi:10.1155/2021/1031906), 2021-06-20

**a**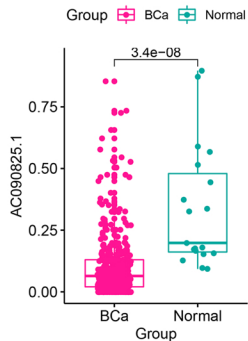**b**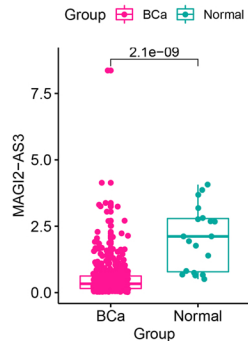**c**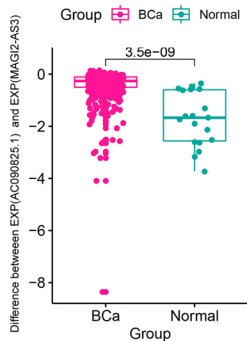**d**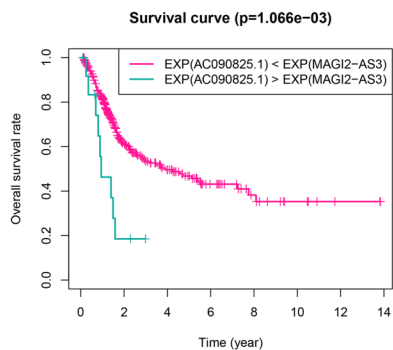**e**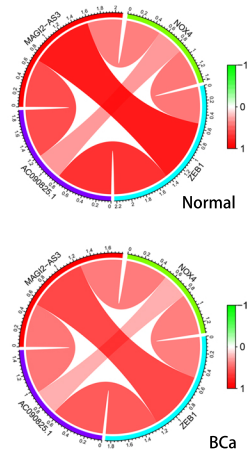**f**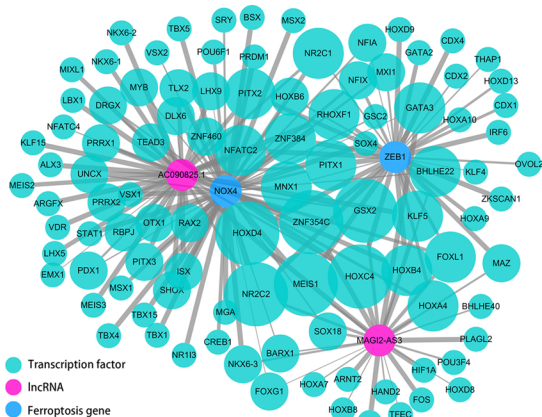**g**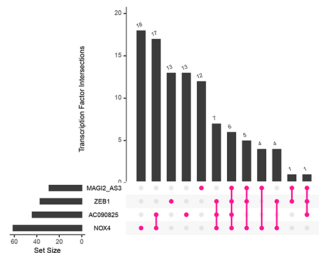**h**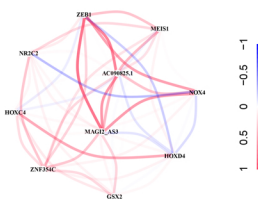

Supplement: f1 [file 1031906.f1.zip]

a

Survival curve ( $p=1.216e-11$ )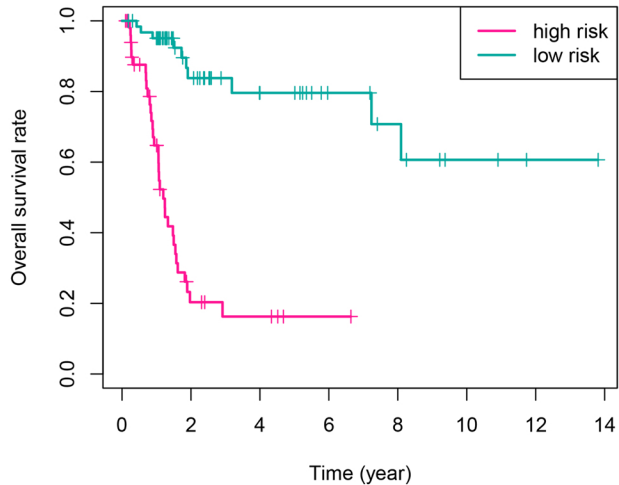

b

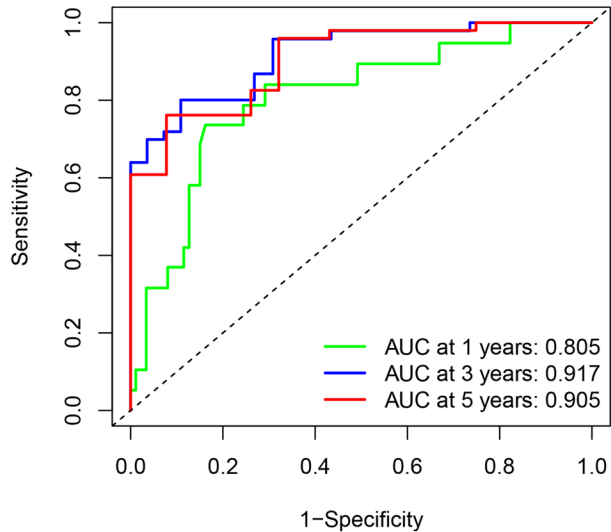

Supplement: f1 [file 1031906.f1.zip]

**a****Age $\leq$ 64 ( $p=4.375e-04$ )**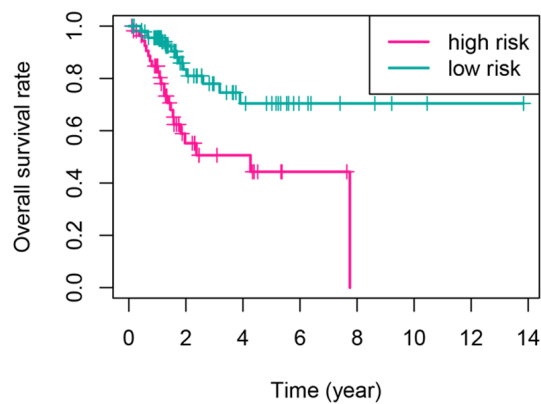**b****Age $>$ 64 ( $p=1.665e-15$ )**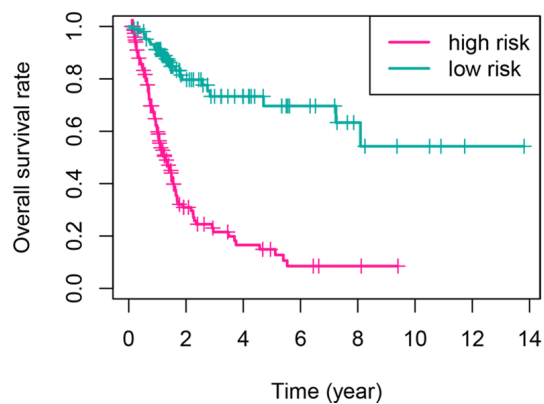**c****Male ( $p=0e+00$ )**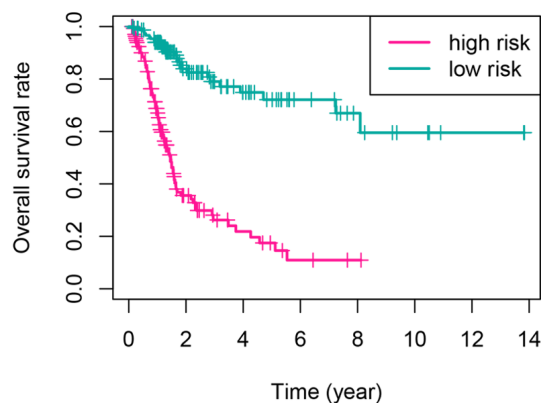**d****Female ( $p=5.7e-04$ )**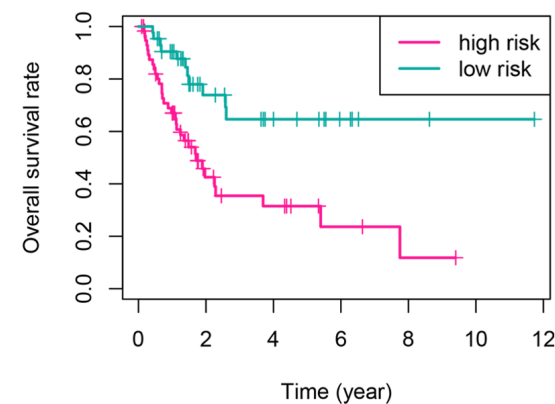**e****T 1-2 ( $p=4.534e-05$ )**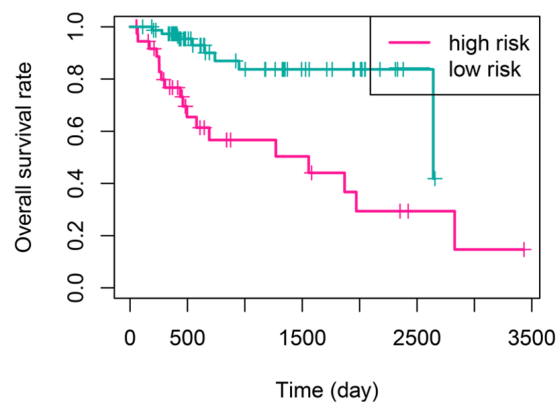**f****T 3-4 ( $p=6.558e-11$ )**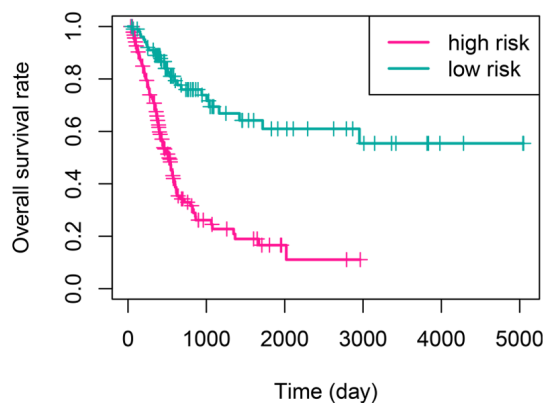**g****N0 ( $p=6.804e-11$ )**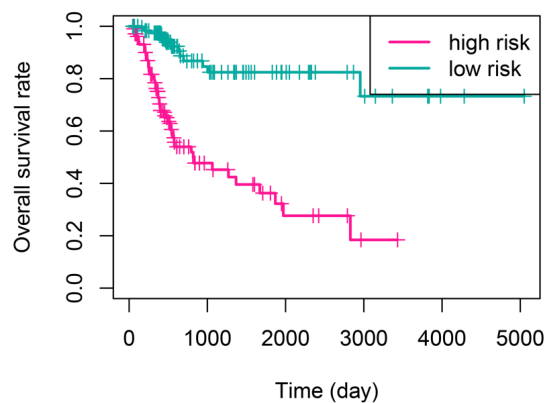**h****N1-3 ( $p=2.906e-07$ )**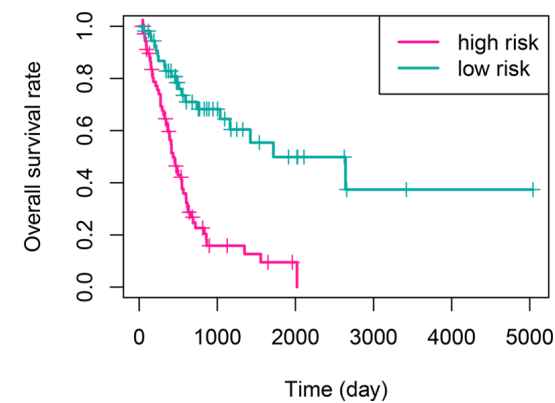**i****M0 stage ( $p=2.461e-12$ )**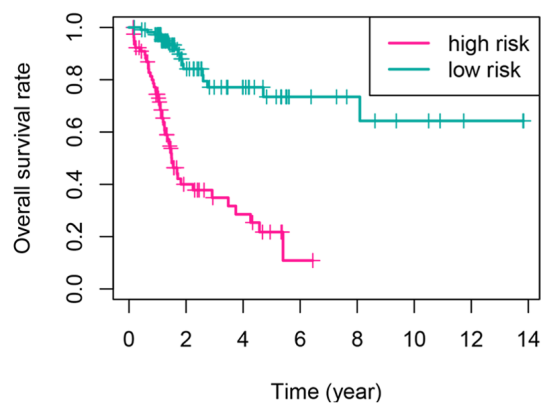**j****M1 stage ( $p=4.025e-02$ )**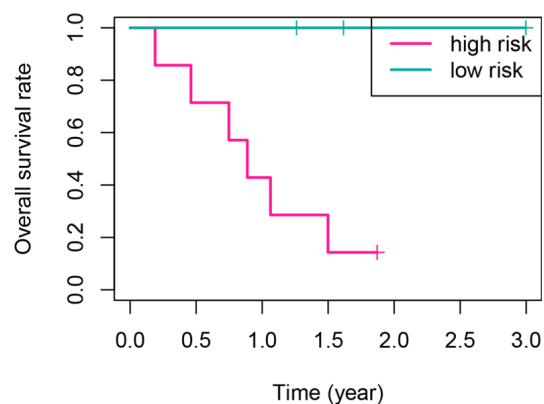

Supplement: f1 [file 1031906.f1.zip]
